# Supplementary material for: Data-driven approach towards identifying dyesensitizer molecules for higher power conversion efficiency in solar cells
Source: Royal Society of Chemistry journal article supplement (doi:10.1039/d1nj05498h), 2022-01-01
Supplement: d1nj05498h1.xlsx [file d1nj05498h1.xlsx]

## Sheet: ML dataset with SMILES and Refr
Code	nCl	nBr	ATSC3c	ATSC4c	ATSC7c	ATSC4e	AATSC5i	AATSC8i	AATSC0s	MATS3c	MATS7c	MATS4v	MATS4p	MATS4i	MATS5i	MATS8s	GATS6c	GATS4v	GATS4p	GATS4i	GATS5i	GATS6i	GATS3s	GATS4s	GATS5s	CrippenLogP	VE1_Dt	nsOm	nsCl	nsBr	SHCsatu	SsNH2	SdssS	SsCl	minHBint2	minHBint4	minHsOH	minHCsats	minHCsatu	minsssCH	minsF	minsCl	maxHCsatu	maxtsC	maxtN	ETA_Epsilon_2	ETA_Epsilon_4	ETA_dEpsilon_C	n4Ring
d1	0	0	0.214864	-0.770965	-0.295144	-0.697333	-0.243611	-0.037383	2.35906	0.078142	-0.107339	0.053489	0.005406	0.069862	-0.146049	0.090743	0.667915	0.952211	0.968528	0.91433	1.10629	0.925481	0.863811	0.749029	0.606189	5.98617	0	0	0	0	1.70504	0	0	0	6.91353	0	0.612106	0.285072	0.852522	0	0	0	0.852522	0	0	0.85969	0.57985	-0.1377	0
d2	0	0	-0.32043	0.244192	0.029216	1.4397	-0.249921	-0.177442	1.19582	-0.14675	0.012023	-0.130704	-0.117004	-0.108434	-0.169672	-0.041708	0.866285	1.09006	1.05143	1.07722	1.15601	0.922636	0.560695	0.599962	0.845327	12.7168	0.10621	0	0	0	0	0	0	0	7.15623	0	0.632634	0.48063	0	0	0	0	0	1.77719	9.16298	0.77097	0.49864	-0.05102	0
d3	0	0	-0.280167	0.383015	-0.844169	1.6001	0.015248	0.082878	1.23714	-0.109782	-0.272859	0.057669	0.073563	0.083752	0.010125	0.212771	0.715069	0.884453	0.875219	0.984125	1.02061	0.946602	0.63765	0.707614	0.734952	7.66418	0.043842	0	0	0	0	0	0	0	6.75923	4.58648	0.47587	0.308968	0	-0.621676	0	0	0	0	0	0.81667	0.51986	-0.0744	0
d4	0	0	-0.180503	0.222369	-0.098973	-0.151253	-0.257184	-0.255329	2.87686	-0.093933	-0.066048	-0.195112	-0.178134	-0.096167	-0.132527	-0.093982	0.743852	1.1603	1.17308	1.09968	1.05784	0.886552	0.681493	0.825579	0.827004	4.67664	0.169254	0	0	0	0	0	0	0	7.72855	0	0.70656	0.393932	0	0	14.4761	0	0	1.49996	8.82526	0.86603	0.56125	-0.12171	0
d5	0	0	-0.1241	0.027428	-0.07971	0.056294	-0.039487	0.171673	1.26496	-0.072594	-0.046327	-0.043429	0.02311	0.055081	-0.024871	0.079099	0.775386	0.978995	0.884717	0.934039	0.985063	1.07367	0.514897	0.547323	0.510042	9.02325	0.463419	0	0	0	0	0	0	0	7.3932	0	0.660173	0	0	0	0	0	0	1.72149	9.06627	0.77907	0.51237	-0.06536	0
d6	0	0	-0.225195	-0.080721	0.030629	0.895275	-0.073302	-0.145443	0.93667	-0.140416	0.021854	0.051544	0.063809	0.080278	-0.050176	-0.042144	0.730647	0.947768	0.899607	0.907617	1.01648	0.945542	0.571369	0.514298	0.598025	13.3616	0.167383	0	0	0	0	0	0	0	7.18515	0	0.638051	0.345637	0	0	0	0	0	1.78126	9.12438	0.74906	0.4763	-0.03401	0
d7	0	0	-0.163011	0.030218	-0.088115	0.498386	-0.00049	-0.019744	0.856643	-0.090201	-0.035863	0.043223	0.049932	0.101311	-0.00034	-0.007127	0.688218	0.916143	0.95754	0.882881	0.948188	1.04183	0.494255	0.49175	0.539363	14.1136	0.027386	0	0	0	0.537567	0	0	0	6.2151	0	0.517437	0.29048	0.537567	0	0	0	0.537567	1.94931	9.7371	0.74194	0.47792	-0.0303	0
d8	0	0	-0.211476	-0.405184	-0.207281	-0.103855	0.120387	-0.024084	1.03875	-0.061647	-0.048062	0.085228	0.086291	0.077318	0.084011	0.003266	1.04373	0.907781	0.915606	0.967226	0.951223	1.07241	0.616533	0.820041	0.942505	19.5791	0.208633	0	0	0	0	0	0	0	6.65573	0	0.568446	0.280189	0	0.279381	0	0	0	1.82151	9.48	0.77984	0.49337	-0.05188	0
d9	0	0	-0.272844	0.242912	-0.217346	1.41366	-0.037503	-0.045832	1.29399	-0.186424	-0.126813	0.22032	0.192459	0.180638	-0.025634	0.001328	0.810087	0.792796	0.802196	0.806408	1.01538	1.15643	0.553776	0.389133	1.1647	8.01754	0.062797	0	0	0	1.08374	0	0	0	6.76868	0	0.589241	0.397788	0.513805	0	0	0	0.569933	1.85384	9.30858	0.76667	0.48774	-0.04633	0
d10	0	0	-0.163127	-0.033649	0.045977	0.338988	-0.186786	-0.02419	1.1202	-0.108214	0.029346	-0.106074	-0.073833	-0.025066	-0.124649	-0.006888	0.753729	1.06245	1.01019	0.997949	1.08246	0.967595	0.518967	0.513557	0.571127	9.65533	0.339417	0	0	0	0	0	0	0	7.24009	0	0.645795	0.449732	0	0	0	0	0	1.79047	9.08707	0.76099	0.4952	-0.04716	0
d11	0	0	-0.126812	0.020487	0.008491	1.00353	0.069031	-0.069989	0.740476	-0.07122	0.003673	0.091736	0.106041	0.115243	0.047092	-0.055359	0.64203	0.941743	1.01552	0.926253	0.984803	1.06435	0.458914	0.471525	0.5177	16.8935	0.734658	0	0	0	1.40142	0	0	0	5.95378	0	0.494961	0.263636	0.459698	0.653094	0	0	0.475271	1.99678	9.76023	0.75137	0.47763	-0.03659	0
d12	0	0	-0.045657	0.161149	-0.187077	0.565263	0.20724	0.190294	1.76046	-0.02361	-0.081285	0.033877	-0.000999	-0.040839	0.149153	0.035561	0.710764	0.97766	1.00232	1.02924	0.871516	1.34594	0.552479	0.512279	0.566539	3.47844	0.102081	0	0	0	0	0	0	0	7.48397	0	0.691135	0.385853	0	0	0	0	0	0	0	0.8284	0.52646	-0.08246	0
d13	0	0	-0.045657	0.161149	-0.187077	0.565263	0.20724	0.190294	1.76046	-0.02361	-0.081285	0.033877	-0.000999	-0.040839	0.149153	0.035561	0.710764	0.97766	1.00232	1.02924	0.871516	1.34594	0.552479	0.512279	0.566539	3.47844	0.102081	0	0	0	0	0	0	0	7.48397	0	0.691135	0.385853	0	0	0	0	0	0	0	0.8284	0.52646	-0.08246	0
d14	0	0	-0.177506	0.150822	0.160168	-0.321031	-0.05143	0.004779	1.12905	-0.093091	0.085207	-0.095028	-0.05592	-0.002433	-0.032939	-0.029819	0.932581	1.01237	0.994452	1.06265	1.01645	0.926471	0.617167	0.912935	0.731252	6.39818	0.11238	0	0	0	0	0	0	0	7.10738	0	0.625083	0.392223	0	-0.430639	0	0	0	0	0	0.81143	0.52099	-0.07362	0
d15	0	0	-0.148225	0.065362	-0.099722	0.809455	-0.101389	-0.416582	1.63601	-0.129624	-0.0897	0.145941	0.14174	0.183084	-0.063126	-0.016185	0.695612	0.861353	0.944898	0.82317	1.0511	1.08107	0.487494	0.542954	0.59723	6.53965	0.077398	0	0	0	0.422395	0	0	0	7.24972	0	0.652494	0.248007	0.422395	0	0	0	0.422395	1.81217	9.01206	0.79762	0.52116	-0.08116	0
d16	0	0	-0.212661	-0.131648	0.221749	-0.133058	0.044663	0.084163	1.0651	-0.101699	0.10756	0.084989	0.12088	0.147369	0.029869	-0.035816	0.866117	0.891714	0.831062	0.858009	0.955527	1.03037	0.581906	0.632187	0.616381	12.8545	0.245483	0	0	0	0	0	0	0	7.13932	0	0.631745	0.269821	0	0	0	0	0	1.82177	9.16189	0.79167	0.50345	-0.06227	0
d17	0	0	-0.299519	-0.110384	-0.139929	0.949671	0.09651	-0.078128	1.08211	-0.078083	-0.029266	0.122692	0.134096	0.120186	0.066002	-0.031212	0.768684	0.886641	0.951505	0.949496	1.00754	1.08712	0.500928	0.556471	0.583002	20.7454	0.127427	0	0	0	1.13415	0	0	0	5.73615	0	0.464716	0.283684	0.566476	0	0	0	0.567672	1.96911	9.99904	0.78492	0.4987	-0.0587	0
d18	0	0	-0.194867	-0.107424	-0.016936	0.176112	-0.057533	-0.10299	1.10184	-0.092791	-0.005232	-0.027549	0.003753	0.038395	-0.040324	0.015559	0.607511	1.03196	1.01167	0.995072	1.04707	1.08837	0.510608	0.501491	0.395538	10.4245	0.07463	0	0	0	0	0	0	0	6.70325	0	0.575153	0.329994	0	0	0	0	0	1.82984	9.43943	0.78593	0.497	-0.05526	0
d19	0	0	-0.632669	0.2325	-0.197355	3.27179	-0.057592	0.136173	1.68527	-0.370454	-0.111783	0.034002	0.041919	0.073728	-0.039357	0.060201	0.71542	0.957648	0.951649	0.923888	1.01905	1.02137	0.806949	0.491332	0.468592	5.27898	0.181481	0	0	0	0	0	0	0	1.3331	7.61913	0	0.250025	0	0	0	0	0	0	0	0.8129	0.51486	-0.07554	0
d20	0	0	-0.366529	0.151056	-0.265807	0.819613	-0.065809	0.082546	1.87624	-0.15354	-0.090767	-0.00511	0.031124	0.123127	-0.043466	0.0821	0.653087	0.987828	1.05859	0.889337	0.991094	1.04834	0.552098	0.540382	0.467793	10.3637	0.088048	0	0	0	0	0	0	0	7.18039	0	0.631517	0	0	0	0	0	0	1.72464	9.19942	0.79067	0.51333	-0.07048	0
d21	0	0	-0.201729	-0.057211	0.140603	0.057627	-0.060245	0.112743	0.850174	-0.102997	0.054725	0.066181	0.07983	0.142326	-0.03998	-0.018828	0.726998	0.891359	0.935704	0.889071	1.00208	1.08299	0.514311	0.507169	0.559453	15.7511	0.598429	0	0	0	0.533054	0	0	0	6.51547	0	0.551146	0.291831	0.533054	0	0	0	0.533054	1.89763	9.58114	0.75397	0.48452	-0.03715	0
d22	0	0	-0.222402	-0.257498	0.212372	-0.360551	0.133375	-0.219455	1.55684	-0.118307	0.100518	-0.147918	-0.093065	-0.00472	0.086464	-0.037426	0.811921	1.0783	1.03736	1.02595	0.875089	1.06875	0.634854	0.60347	0.412535	5.96835	0.202471	0	0	0	0	0	0	0	7.56753	0	0.67978	0	0	0	0	0	0	1.67637	9.00669	0.82549	0.53822	-0.09354	0
d23	0	0	0.082296	-0.086157	-0.012759	-0.515198	0.052452	-0.141756	1.34334	0.054372	-0.008996	0.01014	0.021456	0.004465	0.033651	-0.074398	0.551011	0.960584	0.928801	0.999726	0.948633	0.972348	0.545728	0.907025	0.845068	7.80735	0.125665	0	0	0	0	0	0	0	7.37633	0	0.670337	0.266862	0	0	0	0	0	2.44087	9.9555	0.78571	0.50732	-0.0659	0
d24	0	0	-0.176784	0.014409	-0.118417	0.481685	-0.306857	-0.471737	1.95916	-0.135227	-0.144611	0.071737	0.063664	0.149479	-0.18324	-0.044778	0.851368	0.963589	1.11736	0.870138	1.16588	1.11686	0.469133	0.536482	0.661444	4.27577	0.263617	0	0	0	0	0	0	0	7.4487	0	0.680371	0.289269	0	0	0	0	0	1.77623	8.87876	0.82464	0.54626	-0.10472	0
d25	0	0	-0.061307	0.030346	-0.172707	0.200753	-0.04142	-0.206074	1.30709	-0.037965	-0.093272	0.065179	0.098053	0.084923	-0.025989	0.001883	0.791569	0.844559	0.843387	0.959214	1.05711	1.13619	0.499093	0.553492	0.596654	9.26764	0.36338	0	0	0	0	0	0	0	7.15309	0	0.63259	0.336059	0	0	0	0	0	1.81812	9.16666	0.78167	0.51648	-0.06833	0
d26	0	0	-0.105633	0.051866	-0.099478	0.750422	-0.018568	0.099983	0.893783	-0.060486	-0.055758	0.106761	0.100926	0.147039	-0.012829	0.039495	0.576318	0.899581	0.982287	0.882797	1.01804	1.06761	0.431846	0.461254	0.447532	12.9573	0.688652	0	0	0	0	0	0	0	6.97959	0	0.612733	0.228954	0	0.611625	0	0	0	1.79912	9.23038	0.752	0.48226	-0.03733	0
d27	0	0	-0.190598	-0.091215	-0.059445	-0.185187	-0.020958	0.045451	1.08744	-0.094237	-0.022778	-0.049367	0.003752	0.073671	-0.014614	0.085726	0.660417	0.98577	0.93977	0.908196	0.953274	1.07892	0.598706	0.605946	0.483293	11.4631	0.210863	0	0	0	0	0	0	0	7.34408	0	0.652614	0	0	0	0	0	0	3.45554	9.10748	0.77436	0.49271	-0.04826	0
d28	0	0	-0.174048	-0.016234	0.008431	0.461097	-0.322241	-0.205716	0.979404	-0.107348	0.004788	-0.113618	-0.077627	-0.064536	-0.217135	-0.070821	0.809941	1.0795	1.03984	1.03823	1.18808	0.925936	0.520947	0.502618	0.562847	13.0966	0.280404	0	0	0	0	0	0	0	7.0372	0	0.618093	0.460824	0	0	0	0	0	1.82753	9.22923	0.75309	0.48821	-0.04026	0
d29	0	0	-0.185545	0.015105	-0.165671	0.461097	-0.315263	-0.069105	0.979404	-0.11437	-0.102584	-0.113618	-0.077627	-0.064536	-0.212433	-0.018686	0.676714	1.0795	1.03984	1.03823	1.17554	0.954142	0.522216	0.498013	0.579082	13.0966	0.289136	0	0	0	0	0	0	0	7.04158	0	0.618507	0.445049	0	0	0	0	0	1.82723	9.22876	0.75309	0.48821	-0.04026	0
d30	0	0	-0.30141	0.028955	-0.127525	1.12587	-0.065912	-0.095975	1.96778	-0.123551	-0.050049	0.042285	0.072499	0.128322	-0.042073	0.09723	0.618579	0.954524	0.950125	0.880093	1.0146	0.994017	0.47316	0.496786	0.541833	9.63493	0	0	0	0	0	0	0	0	7.08844	0	0.624199	0.260381	0	0	0	0	0	1.79046	9.19902	0.80667	0.528	-0.08627	0
d31	0	0	-0.123806	0.026735	0.017023	0.866488	-0.033637	-0.176948	0.830611	-0.074049	0.009014	0.097558	0.110814	0.129544	-0.022517	-0.077556	0.668568	0.932294	1.04691	0.917375	1.06154	1.03001	0.467399	0.499377	0.568578	14.9852	0.671172	0	0	0	1.40142	0	0	0	6.28984	0	0.531612	0.263636	0.459698	0	0	0	0.475271	1.9583	9.59976	0.75697	0.48346	-0.04152	0
d32	0	0	-0.163945	0.053025	-0.039429	0.410834	0.125972	-0.206288	1.47167	-0.123347	-0.028708	-0.015232	0.014175	0.062029	0.083059	0.099125	0.617361	0.964967	0.956369	0.927801	0.890691	1.04537	0.524066	0.51273	0.568128	6.70607	0.373434	0	0	0	0.465123	0	0	0	7.27456	0	0.648484	0	0.465123	0	0	0	0.465123	1.78803	9.09113	0.77647	0.50769	-0.05987	0
d33	0	0	-0.104185	0.020417	-0.125841	1.07075	0.036757	0.074793	0.559349	-0.050593	-0.04514	0.052206	0.051999	0.061962	0.025452	0.049633	0.719215	0.960866	0.999305	0.949926	0.973279	0.968945	0.472675	0.50774	0.526747	25.937	0.290709	0	0	0	0.507908	0	0	0	6.48888	0	0.551615	0.251217	0.507908	0	0	0	0.507908	1.91513	9.54006	0.73261	0.46936	-0.02448	0
d34	0	0	-0.143027	-0.158265	-0.067918	-0.082726	0.047788	-0.115602	1.40833	-0.081423	-0.030886	0.004466	0.013266	0.099312	0.031357	0.084718	0.779579	0.945688	0.936996	0.944889	0.934318	0.997606	0.59693	0.580586	0.47823	7.32114	0.021193	0	0	0	0	0	0	0	7.50901	0	0.671556	0.54797	0	0	0	0	0	1.6696	9.04449	0.79722	0.51566	-0.07166	0
d35	0	0	-0.30948	-0.010448	-0.188022	0.641415	-0.23716	-0.151233	1.09686	-0.098237	-0.041143	-0.150813	-0.114021	-0.082901	-0.159918	0.06511	0.634983	1.10442	1.06635	1.06441	1.13121	0.965684	0.46232	0.464329	0.482124	21.3165	0	0	0	0	0	0	0	0	6.63132	0	0.566116	0.427087	0	0	0	0	0	1.86072	9.4913	0.75843	0.48977	-0.04327	0
d36	0	0	-0.239534	0.203211	-0.268437	-0.058442	-0.093733	0.010897	1.42359	-0.078582	-0.082787	-0.131479	-0.095751	-0.027569	-0.063483	-0.099465	0.82386	1.10687	1.08833	1.02938	1.01682	0.937661	0.583574	0.770317	0.67766	9.83075	0	0	0	0	0	0	0	0	7.11223	0	0.619717	0.39753	0	0	0	0	0	1.72364	9.28258	0.8	0.50667	-0.06414	0
d37	0	0	-0.239534	0.203211	-0.268437	-0.058442	-0.093733	0.010897	1.42359	-0.078582	-0.082787	-0.131479	-0.095751	-0.027569	-0.063483	-0.099465	0.82386	1.10687	1.08833	1.02938	1.01682	0.937661	0.583574	0.770317	0.67766	9.83075	0	0	0	0	0	0	0	0	7.11223	0	0.619717	0.39753	0	0	0	0	0	1.72364	9.28258	0.8	0.50667	-0.06414	0
d38	0	0	-0.239534	0.203211	-0.268437	-0.058442	-0.093733	0.010897	1.42359	-0.078582	-0.082787	-0.131479	-0.095751	-0.027569	-0.063483	-0.099465	0.82386	1.10687	1.08833	1.02938	1.01682	0.937661	0.583574	0.770317	0.67766	9.83075	0	0	0	0	0	0	0	0	7.11223	0	0.619717	0.39753	0	0	0	0	0	1.72364	9.28258	0.8	0.50667	-0.06414	0
d39	0	0	-0.236902	0.348942	-0.757936	0.766277	-0.324062	0.270549	1.36624	-0.08693	-0.295837	0.022115	0.071052	0.121506	-0.20807	0.190604	0.772432	0.909999	0.87346	0.927563	1.20021	0.817451	0.602746	0.697712	0.754515	5.76696	0.282364	0	0	0	0	0	0	0	6.77442	4.59948	0.477084	0.444583	0	-0.601591	0	0	0	0	0	0.82281	0.53651	-0.08451	0
d40	0	0	-0.145434	0.159031	0.200971	0.081042	0.111588	0.081448	0.989795	-0.071535	0.082924	0.051586	0.066036	0.076898	0.073764	0.011752	0.912123	0.889095	0.878988	0.990618	0.953404	1.04353	0.578859	0.862687	0.706769	7.95858	0.087513	0	0	0	0	0	0	0	7.00308	0	0.61199	0.304555	0	-0.432653	0	0	0	0	0	0.8	0.50968	-0.06388	0
d41	0	0	-0.164616	0.159873	0.066486	0.710514	-0.0752	-0.246743	2.23717	-0.156142	0.113143	-0.128417	-0.124538	-0.057177	-0.049516	-0.2259	0.748106	1.13047	1.11118	1.00055	0.933795	0.736502	0.608128	0.553225	0.667768	2.57095	0.16797	0	0	0	0	0	0	0	7.87108	0	0.745203	0	0	0	0	0	0	1.61546	8.55257	0.82963	0.52698	-0.09365	0
d42	0	0	0.047186	0.061861	-0.042431	0.369378	0.018165	-0.195159	0.452221	0.043467	-0.055478	-0.087596	-0.047637	-0.121014	0.010499	0.043911	0.973336	1.08326	1.00375	1.0771	0.953369	1.02049	0.864323	0.763477	0.948201	3.32878	0.012162	0	0	0	0	0	0	0	0	0	0	0.595237	0	0	0	0	0	0	0	0.81449	0.5415	-0.09546	0
d43	0	0	-0.511088	0.731351	-0.332833	1.43314	-0.239371	0.048674	2.6776	-0.168264	-0.096577	0.024603	0.040537	0.154772	-0.125921	0.098627	0.530181	1.01841	0.923982	0.787767	0.991421	0.928909	0.758412	0.670546	0.729984	6.36812	0	0	0	0	0	0	0	0	-1.03865	0	0	0	0	0	0	0	0	1.85811	9.24088	0.82909	0.57453	-0.13259	0
d44	0	0	-0.274629	-0.039144	-0.041753	0.063389	0.002177	0.063066	0.841095	-0.106957	-0.014413	0.117064	0.122584	0.075651	0.001489	-0.006493	0.947424	0.869012	0.870722	0.97178	1.06	1.09022	0.595783	0.616506	0.568649	16.1287	0.313181	0	0	0	0	0	0	0	6.9724	0	0.602749	0.279997	0	0	0	0	0	1.77377	9.36323	0.77795	0.49417	-0.05209	0
d45	0	0	-0.213991	0.160333	-0.115265	1.95173	-0.045667	-0.10422	0.874324	-0.081288	-0.03135	0.07134	0.072033	0.03958	-0.030231	0.003355	1.02666	0.901989	0.898877	0.974382	1.04208	1.01591	0.530023	0.576208	0.697316	16.1654	0.228563	0	0	0	0	0	0	0	6.57135	0	0.554738	0.307935	0	0	0	0	0	1.87154	9.59589	0.78	0.50129	-0.05764	0
d46	0	0	-0.16858	-0.097067	0.027668	-0.458424	-0.125266	0.344108	0.961442	-0.091242	0.012598	-0.028114	0.023206	0.139381	-0.082463	0.137027	0.715502	0.94645	0.917919	0.881285	0.994189	1.16616	0.53242	0.54063	0.575422	14.2254	0	0	0	0	0	0	0	0	7.05503	0	0.616056	0	0	0	0	0	0	1.81112	9.27823	0.75965	0.49124	-0.04222	0
d47	0	0	-0.07633	0.135983	-0.12456	0.613897	-0.155433	-0.091938	1.05267	-0.034017	-0.045438	-0.044668	-0.029788	0.017181	-0.104347	0.083308	0.836283	1.01576	1.0767	0.978912	1.05944	1.03789	0.615751	0.529468	0.519624	11.3763	0.16795	0	0	0	0	0	0	0	6.95273	0	0.604686	0.495261	0	0	0	0	0	1.7977	9.31247	0.78	0.50465	-0.057	0
d48	0	0	-0.195652	0.065726	-0.024061	0.875152	0.02398	0.014774	0.810362	-0.100139	-0.010134	0.120887	0.107123	0.0882	0.015709	-0.059869	0.807633	0.883896	1.02267	0.980054	1.05051	1.11442	0.522219	0.570147	0.650978	15.5073	0.063425	0	0	0	1.05475	0	0	0	6.23223	0	0.520055	0.283426	0.517319	0	0	0	0.537426	1.9451	9.71519	0.76455	0.49004	-0.04767	0
d49	0	0	-0.270929	0.025965	-0.218684	1.40218	-0.007727	-0.159416	1.36601	-0.100136	-0.068679	0.098385	0.095746	0.145238	-0.005014	-0.021919	0.611368	0.914567	1.00698	0.884948	1.00163	1.0043	0.45667	0.480219	0.531031	16.5573	0	0	0	0	0.994034	0	0	0	6.66417	0	0.572804	0.278726	0.497017	0	0	0	0.497017	1.87649	9.43193	0.78205	0.50614	-0.06406	0
d50	0	0	-0.184578	0.005078	-0.12414	0.687116	-0.012075	-0.249234	1.34365	-0.129023	-0.103847	-0.035132	0.005628	0.018973	-0.007521	-0.042394	0.564213	1.03843	0.991573	0.950602	0.952025	0.881423	0.517347	0.477351	0.507828	7.84524	0.200002	0	0	0	0.446047	0	0	0	7.2229	0	0.646408	0.341588	0.446047	0.579586	0	0	0.446047	1.81078	9.06123	0.78704	0.51382	-0.06982	0
d51	0	0	0.004611	-0.245516	-0.174477	0.075587	0.18733	-0.042448	0.902431	0.001845	-0.053866	0.053985	0.05936	0.070377	0.125816	0.018694	0.732397	0.923463	0.918681	0.972215	0.89215	1.04304	0.495712	0.544759	0.429094	14.635	0.362953	0	0	0	0	0	0	0	7.16061	0	0.623674	0.292189	0	0.562298	0	0	0	1.73152	9.28992	0.77414	0.49784	-0.05284	0
d52	0	0	-0.113423	-0.004131	-0.104048	0.055919	-0.026476	0.214583	1.24109	-0.067034	-0.058476	-0.029352	0.039172	0.078555	-0.016839	0.075496	0.740176	0.971989	0.880508	0.915344	0.955815	1.06385	0.537588	0.593136	0.530917	8.83564	0.444872	0	0	0	0	0	0	0	7.432	0	0.664904	0	0	0	0	0	0	3.34074	9.04781	0.77556	0.50777	-0.06143	0
d53	0	0	-0.134016	0.098977	-0.111281	1.30283	0.16737	-0.118222	0.752756	-0.077884	-0.062139	0.203172	0.176971	0.214685	0.106796	0.056199	0.948538	0.817005	0.936416	0.813726	1.00431	1.10254	0.475096	0.55536	0.524846	18.6762	0.298142	0	0	0	0	0	0	0	6.92392	0	0.603446	0.23765	0	0	0	0	0	3.64665	9.29678	0.7607	0.48821	-0.0479	0
d54	0	0	-0.105638	0.051823	-0.096018	0.562131	-0.068567	0.055019	1.05012	-0.064158	-0.056794	0.09994	0.091762	0.159166	-0.04644	0.028334	0.560502	0.903146	1.00252	0.87526	1.03907	1.09719	0.442553	0.470726	0.457699	10.6167	0.666902	0	0	0	0	0	0	0	7.10711	0	0.628884	0.266611	0	0.613535	0	0	0	1.78004	9.15678	0.75909	0.49057	-0.0439	0
d55	0	0	-0.344174	0.482981	-0.223954	0.956549	-0.185694	0.066106	2.28648	-0.162711	-0.093548	0.045706	0.058712	0.160262	-0.102196	0.106919	0.514853	0.957256	0.897449	0.799376	0.979102	0.95305	0.732945	0.658432	0.719822	6.16198	0	0	0	0	0	0	0	0	-0.996622	0	0	0	0	0	0	0	0	1.86604	9.14416	0.81318	0.55076	-0.10861	0
d56	0	0	-0.171557	0.022122	-0.149077	0.180247	-0.153995	0.053908	1.41445	-0.129706	-0.101775	0.005972	0.041043	0.142989	-0.099054	-0.002132	0.639834	0.941168	0.991364	0.879615	1.02083	1.06221	0.55941	0.583495	0.615181	8.94936	0.0244	0	0	0	0	0	0	0	7.29986	0	0.654134	0	0	0	0	0	0	1.79114	9.04634	0.77963	0.50556	-0.06156	0
d57	0	0	-0.109351	0.042348	-0.17097	0.274061	0.130784	0.089699	0.898185	-0.062664	-0.064237	0.052535	0.06241	0.096911	0.086528	0.111169	0.600328	0.90432	0.974939	0.951721	0.915956	1.05611	0.55998	0.538482	0.494134	15.7261	0.06642	0	0	0	1.0408	0	0	0	7.06363	0	0.619371	0.40921	0.520399	0.358269	0	0	0.520399	1.77764	9.23706	0.75537	0.48402	-0.03923	0
d58	0	0	-0.219971	0.009944	-0.164781	0.391693	-0.014006	0.009463	0.70933	-0.093494	-0.059275	0.081731	0.087787	0.148012	-0.00895	-0.036285	0.896532	0.91423	0.966385	0.921004	1.0662	1.09741	0.469413	0.523455	0.56933	18.6744	0.164215	0	0	0	0	0	0	0	6.84516	0	0.594212	0.270703	0	0	0	0	0	1.85924	9.34022	0.77353	0.49634	-0.05467	0
d59	0	0	0.070436	-0.388634	-0.165882	-0.620591	-0.18448	0.094113	1.74951	0.048427	-0.104384	0.049225	0.015076	0.107841	-0.114667	0.122812	0.648839	0.921201	0.972649	0.900247	1.04372	1.03755	0.94147	0.830935	0.659204	5.78658	0.033599	0	0	0	0.837824	0	0	0	7.18514	0	0.64974	0	0.837824	0	0	0	0.837824	0	0	0.8172	0.53237	-0.08984	0
d60	0	0	-0.191274	0.086325	-0.059798	0.240865	-0.05923	0.096588	1.30446	-0.117658	-0.034591	-0.000321	0.055524	0.05661	-0.036976	0.065174	0.785442	0.944438	0.867068	0.936722	1.00662	1.05473	0.547721	0.561827	0.543356	8.83106	0.050865	0	0	0	0	0	0	0	7.41737	0	0.663923	0	0	0	0	0	0	1.71667	9.04442	0.78293	0.5129	-0.06777	0
d61	0	0	0.063729	-0.425539	-0.143941	-0.364418	-0.234193	0.084939	1.75815	0.041831	-0.122938	-0.021953	-0.038751	0.015044	-0.145567	0.141326	0.791093	1.03605	1.05547	0.970376	1.09122	1.08302	0.952608	0.859879	0.710716	5.80038	0.181462	0	0	0	0.833617	0	0	0	7.23942	0	0.658172	0	0.833617	0	0	0	0.833617	0	0	0.8172	0.53237	-0.08984	0
d62	0	0	0.070531	-0.047192	-0.043711	-0.036	-0.035973	-0.01732	0.873283	0.04521	-0.024247	0.071126	0.042158	0.08409	-0.024226	-0.032649	0.665586	0.944216	1.09895	0.949517	1.01808	1.06005	0.830355	0.441386	0.793139	10.1771	0.063666	0	0	0	1.25845	0	0	0	7.04584	0	0.635019	0.26668	0.47776	0	0	0	0.780686	0	0	0.765	0.48416	-0.0413	0
d63	0	0	0.112339	-0.102501	0.198024	-0.371351	-0.002057	-0.090968	0.703367	0.036581	0.050824	-0.005877	0.02809	0.083673	-0.001383	-0.028565	0.672081	0.977092	0.972262	0.952119	0.994341	1.05271	0.544519	0.562084	0.613708	21.7497	0.138244	0	0	0	0	0	0	0	6.59041	0	0.551466	0.320009	0	0	0	0	0	1.86976	9.67734	0.76349	0.48992	-0.04125	0
d64	0	0	0.042582	-0.249516	-0.218045	-0.033058	-0.296528	-0.215178	1.11258	0.020942	-0.070585	-0.074239	-0.076625	-0.00765	-0.187581	0.029018	0.73282	0.984388	0.982492	1.00641	1.1628	1.05493	0.808687	0.704252	0.524902	11.0557	0.398452	0	0	0	0.848764	0	0	0	6.89012	0	0.608124	0.456238	0.848764	0	0	0	0.848764	0	0	0.78693	0.51225	-0.06335	0
d65	0	0	0.042582	-0.249516	-0.218045	-0.033058	-0.296528	-0.215178	1.11258	0.020942	-0.070585	-0.074239	-0.076625	-0.00765	-0.187581	0.029018	0.73282	0.984388	0.982492	1.00641	1.1628	1.05493	0.808687	0.704252	0.524902	11.0557	0.398452	0	0	0	0.848764	0	0	0	6.89012	0	0.608124	0.456238	0.848764	0	0	0	0.848764	0	0	0.78693	0.51225	-0.06335	0
d66	0	0	-0.202885	-0.110545	-0.135769	-0.03265	0.054021	-0.03617	1.5864	-0.135822	-0.081648	0.009156	0.041879	0.123767	0.03617	0.157151	0.634408	0.929928	0.906659	0.894294	0.905771	1.06817	0.613448	0.601364	0.449295	6.75236	0.043651	0	0	0	0	0	0	0	7.69687	0	0.699091	0	0	0	0	0	0	1.6461	8.90661	0.8	0.51233	-0.0698	0
d67	0	0	-0.010135	-0.076141	-0.081531	-0.916927	0.003836	0.171648	0.676785	-0.004697	-0.039654	0.033282	0.063102	0.034414	0.002636	0.09705	0.700283	0.951431	0.908755	0.974591	0.998372	1.01596	0.619599	0.866609	0.76336	18.1002	0.266547	0	0	0	0	0	0	0	6.89236	0	0.599663	0.251768	0	0	0	0	0	0	0	0.76766	0.48217	-0.03886	0
d68	0	0	-0.271102	-0.223989	-0.007671	0.944669	-0.047117	-0.095695	0.963208	-0.147651	-0.00478	0.043331	0.040739	0.061469	-0.032942	-0.036357	0.815958	0.962326	0.954535	0.931565	1.00247	0.935495	0.616497	0.515065	0.446482	12.8932	0.167383	0	0	0	0	0	0	0	7.49123	0	0.669944	0.348817	0	0	0	0	0	1.66719	9.04516	0.75849	0.48	-0.03772	0
d69	0	0	-0.184662	-0.004845	-0.20047	-0.032586	-0.084188	0.102804	0.940632	-0.106058	-0.086252	0.042897	0.072102	0.163614	-0.055278	0.022884	0.641588	0.896139	0.956519	0.85847	0.971486	1.04875	0.572182	0.578018	0.590235	15.7993	0	0	0	0	0	0	0	0	6.93634	0	0.602977	0	0	0	0	0	0	1.84906	9.32517	0.75889	0.48989	-0.04354	0
d70	0	0	-0.213087	0.015882	0.050414	0.671473	-0.289884	-0.225491	1.01242	-0.13314	0.02831	-0.111782	-0.078483	-0.082419	-0.194722	-0.076696	0.830304	1.07848	1.02415	1.05204	1.16942	0.892224	0.516727	0.492951	0.559317	12.5828	0.257467	0	0	0	0	0	0	0	6.95884	0	0.607325	0.461825	0	0	0	0	0	1.84186	9.28847	0.75513	0.49086	-0.04229	0
d71	0	0	-0.081105	-0.083389	-0.112252	-0.494249	-0.089022	-0.016549	2.55471	-0.153027	-0.194146	-0.031995	-0.000706	0.006002	-0.057152	0.107828	0.994254	1.0462	0.998282	0.986329	1.03156	0.97007	0.54731	0.551066	0.420296	5.53087	0	2	0	0	0	0	0	0	0	0	0	0	0	0	0	0	0	0	0	0.84713	0.53333	-0.09357	0
d72	0	0	0.213501	-0.0489	-0.164029	-0.110451	-0.011144	0.062971	1.05491	0.059696	-0.038442	0.059145	0.068457	0.094461	-0.007677	-0.017859	0.793413	0.926694	0.987082	0.938296	1.00215	1.09445	0.633593	0.7721	0.724584	18.0121	0.362978	0	0	0	0	0	0	0	6.83171	0	0.57982	0.325839	0	0	0	0	0	0	0	0.80228	0.50716	-0.06472	0
d73	0	0	-0.176588	-0.059647	0.107449	0.442459	-0.147783	-0.067824	0.765728	-0.096228	0.05473	-0.079087	-0.063187	-0.033043	-0.102748	-0.076205	0.750247	1.06343	1.05721	1.02471	1.07709	1.00718	0.515665	0.527261	0.595613	16.4942	0.553168	0	0	0	0.50434	0	0	0	6.61184	0	0.565778	0.281987	0.50434	0	0	0	0.50434	1.87541	9.47206	0.73768	0.47257	-0.02654	0
d74	0	0	-0.171999	-0.119541	-0.211217	0.964222	0.033926	-0.043155	0.770682	-0.09063	-0.100576	0.120037	0.125393	0.137316	0.022899	4.4e-05	0.725275	0.876173	0.86362	0.865948	0.9607	1.03201	0.507471	0.487575	0.528074	16.9413	0.208788	0	0	0	0	0	0	0	6.855	0	0.595661	0.234747	0	0	0	0	0	1.85583	9.33041	0.75185	0.48017	-0.03617	0
d75	0	0	-0.118218	-0.029877	-0.109291	0.356887	-0.274759	-0.140621	1.34892	-0.077963	-0.090852	-0.043536	0.005649	0.076824	-0.175928	-0.024382	0.5851	1.02828	1.00241	0.912517	1.10659	0.91357	0.468624	0.511038	0.558417	7.84536	0.450947	0	0	0	0.912791	0	0	0	7.26688	0	0.651215	0.39377	0.456395	0	0	0	0.456395	1.80163	9.04796	0.77963	0.51057	-0.06363	0
d76	0	0	-0.010221	0.017984	-0.303588	-0.135549	-0.089276	0.07024	0.803285	-0.004493	-0.078414	-0.042885	-0.024935	-0.024185	-0.058063	-0.025962	0.75417	0.953329	0.959394	1.07869	1.08959	1.01419	0.523776	0.609302	0.610979	16.509	0.062931	0	0	0	0	0	0	0	6.76582	0	0.581784	0.455643	0	0	0	0	0	1.8627	9.42596	0.75648	0.48998	-0.04304	0
d77	0	0	0.165799	-0.170541	0.047006	1.14292	0.013111	-0.271795	1.96854	0.07192	0.015914	0.061153	0.040509	0.071358	0.008564	-0.031826	0.723003	0.873731	0.906933	0.998405	1.01283	0.941936	0.505672	0.551777	0.453667	6.54408	0.195147	0	0	0	0	0	0	0	7.23896	0	0.620324	0.335461	0	0	0	0	0	0	0	0.82929	0.54259	-0.09754	0
d78	0	0	-0.058808	0.222698	-0.169958	0.652326	-0.092053	-0.085372	1.12712	-0.01968	-0.049883	-0.026027	-0.004708	0.063032	-0.062674	-0.034382	0.664372	1.03059	1.12822	0.979807	1.06774	1.05201	0.617154	0.56369	0.477329	10.5952	0.321715	0	0	0	0	0	0	0	7.12713	0	0.627405	0.28389	0	0	0	0	0	1.7678	9.19989	0.81111	0.51905	-0.07437	0
d79	0	0	0.004047	-0.081577	-0.122631	0.716245	0.006715	0.002841	0.973294	0.002156	-0.056283	0.136045	0.133609	0.121703	0.004245	-0.059937	0.808303	0.857553	0.966615	0.933499	1.03436	1.10735	0.540717	0.567315	0.630915	14.0719	0.095098	0	0	0	0	0	0	0	6.81267	0	0.590055	0.27956	0	0	0	0	0	1.86664	9.36115	0.77421	0.49483	-0.05255	0
d80	0	0	-0.157145	-0.137364	-0.141046	0.220335	-0.105104	-0.177016	1.1162	-0.087925	-0.061129	-0.121672	-0.097776	-0.04827	-0.071054	0.013091	0.635447	1.06821	1.07975	1.03605	1.02826	0.980411	0.553631	0.513415	0.399196	10.7183	0.027113	0	0	0	0	0	0	0	7.3787	0	0.655284	0.401679	0	0	0	0	0	1.71149	9.11381	0.77163	0.49617	-0.05043	0
d81	0	0	-0.151538	-0.003332	-0.058052	0.254456	-0.127634	-0.127598	1.04818	-0.095769	-0.029321	-0.122854	-0.082861	-0.02822	-0.086663	0.094937	0.577753	1.07136	1.04069	1.00741	1.03369	0.997229	0.495361	0.508471	0.528644	11.7417	0.072827	0	0	0	0	0	0	0	7.01205	0	0.615443	0.393537	0	0	0	0	0	1.81993	9.23402	0.75417	0.48475	-0.03929	0
d82	0	0	-0.20788	-0.123847	-0.141835	0.894151	0.02294	-0.011696	0.796057	-0.111241	-0.068897	0.103559	0.112399	0.127775	0.015838	0.080944	0.727935	0.893456	0.879342	0.876905	0.974385	1.09749	0.512054	0.486305	0.521078	15.3649	0.470195	0	0	0	0	0	0	0	6.95149	0	0.608693	0.234767	0	0	0	0	0	1.82356	9.25619	0.75172	0.47584	-0.03438	0
d83	0	0	-0.509321	0.068612	-0.011604	1.00123	-0.087264	0.177356	2.2447	-0.23708	-0.004806	0.045435	0.080325	0.072597	-0.053323	-0.003329	0.696122	0.979109	0.932625	0.886773	1.01339	1.02651	0.964425	0.533612	0.483148	3.27666	0	0	0	0	0	0	0	0	1.23733	0	0	0	0	0	0	0	0	0	0	0.84476	0.55088	-0.10655	0
d84	0	0	-0.133336	0.080635	0.199647	0.236266	-0.012193	-0.018292	?	-0.112001	0.15697	0.085507	0.063887	0.109755	-0.019665	0	1.14129	0.908764	0.918329	0.915935	1.04762	1.23097	0	0	0	7.55994	0.581797	0	0	0	0	0	0	0	0	0	0	0	0	0	0	0	0	0	0	0.76042	0.58333	-0.13951	0
d85	0	0	-0.152423	-0.051212	-0.136802	0.28989	0.046979	-0.099789	1.22794	-0.086728	-0.053889	0.068133	0.108919	0.14583	0.031488	0.046513	0.601176	0.904125	0.877634	0.897448	0.973791	1.08646	0.481394	0.496987	0.48129	8.88785	0.091055	0	0	0	0	0	0	0	7.03066	0	0.616243	0.279411	0	0.405648	0	0	0	1.82174	9.24597	0.78633	0.50394	-0.06082	0
d86	0	0	-0.590546	0.21107	-0.082352	3.07014	-0.084816	-0.113885	1.61644	-0.340358	-0.049723	-0.015136	0.01131	0.067539	-0.056455	0.012659	0.690372	0.999999	0.9791	0.928146	1.01693	1.00432	0.808536	0.493983	0.486327	6.01368	0.165838	0	0	0	0	0	0	0	1.3393	7.67642	0	0.269391	0	0	0	0	0	0	0	0.8	0.51341	-0.06908	0
d87	0	0	0.039177	-0.449995	0.068236	-0.203898	-0.169176	-0.037056	1.82769	0.019883	0.033844	0.0417	0.052271	0.101323	-0.115525	-0.035074	0.721293	0.919693	0.917394	0.911504	1.07426	1.02525	0.735037	0.854527	0.567351	6.8126	0.037124	0	0	0	0.969439	0	0	0	7.10692	0	0.628765	0.391846	0.969439	0.453459	0	0	0.969439	0	0	0.80175	0.52171	-0.07269	0
d88	0	0	-0.142778	0.050184	-0.035294	0.988691	0.020346	-0.113536	0.926971	-0.085119	-0.01462	0.086696	0.097149	0.090273	0.014099	0.039667	0.691861	0.91051	0.854417	0.926919	1.01278	1.04121	0.437007	0.46425	0.496124	11.4087	0.058776	0	0	0	0	0	0	0	7.05988	0	0.622608	0.265044	0	0	0	0	0	3.50839	9.1897	0.75417	0.47869	-0.03751	0
d89	0	0	0.065997	-0.403054	-0.158426	-0.393882	-0.299358	-0.096034	2.08567	0.048396	-0.176263	-0.157849	-0.127681	-0.093588	-0.182478	0.108738	0.656387	1.15472	1.14037	1.08405	1.10401	0.850188	0.931164	0.832503	0.615105	3.16298	0.012703	0	0	0	0.818279	0	0	0	7.3023	0	0.671076	0.347413	0.818279	0	0	0	0.818279	0	0	0.85797	0.56191	-0.12459	0
d90	0	0	-0.140148	-0.017617	-0.073788	0.424218	-0.320861	-0.449249	1.7763	-0.098279	-0.074893	-0.014399	0.036344	0.117803	-0.203517	0.117307	0.583781	1.00698	0.967701	0.873655	1.13885	1.01582	0.447281	0.471388	0.553362	4.44986	0.411878	0	0	0	0.909882	0	0	0	7.37491	0	0.668321	0.392718	0.454941	0	0	0	0.454941	1.78077	8.94735	0.804	0.52909	-0.08416	0
d91	0	0	-0.047953	0.034237	-0.067546	0.049499	-0.090704	0.043257	0.999088	-0.027016	-0.027092	-0.109936	-0.071555	-0.049707	-0.059274	-0.011006	0.678523	1.03363	1.01895	1.07155	1.05772	1.02897	0.498974	0.5627	0.575805	11.8864	0.101035	0	0	0	0	0	0	0	7.01435	0	0.615706	0.401669	0	0	0	0	0	1.83213	9.23546	0.76164	0.49418	-0.04797	0
d92	0	0	-0.114733	-0.115503	-0.141756	-0.23175	-0.168696	-0.201841	1.72505	-0.098906	-0.159541	-0.157192	-0.129932	-0.121248	-0.108164	0.0989	0.749795	1.14954	1.13946	1.11417	1.04314	0.909463	0.638618	0.696443	0.641259	4.28196	0.042876	0	0	0	0	0	0	0	7.59449	0	0.715576	0.349898	0	0	0	0	0	2.29953	9.50253	0.804	0.51356	-0.07657	0
d93	0	0	-0.241274	0.053348	-0.186688	0.842276	0.026916	-0.03212	0.587099	-0.089837	-0.056644	0.109341	0.119336	0.153799	0.017932	-0.079795	0.951387	0.913117	0.993573	0.9276	1.08224	1.13558	0.474102	0.528263	0.578468	22.92	0.023041	0	0	0	0.493522	0	0	0	5.97	0	0.494443	0.270703	0.493522	0	0	0	0.493522	1.98985	9.79492	0.7625	0.485	-0.04465	0
d94	0	0	0.108202	-0.397262	-0.141577	-0.620591	-0.18448	0.094113	1.74951	0.078659	-0.094199	0.049225	0.015076	0.107841	-0.114667	0.122812	0.53733	0.921201	0.972649	0.900247	1.04372	1.03755	0.94147	0.830935	0.659204	5.78658	0.033599	0	0	0	0.837824	0	0	0	7.18514	0	0.64974	0	0.837824	0	0	0	0.837824	0	0	0.8172	0.53237	-0.08984	0
d95	0	0	-0.09432	0.019012	0.05858	0.791166	0.128634	-0.091809	0.870092	-0.03052	0.017565	0.181442	0.186515	0.128056	0.086911	0.148881	1.19068	0.818782	0.885071	0.912337	0.985648	1.05637	0.623987	0.710892	0.742494	16.7984	0.203163	0	0	0	0	0	0	0	6.39664	0	0.534669	0.277109	0	0	0	0	0	1.91402	9.69474	0.80154	0.50897	-0.06843	0
d96	0	0	-0.23803	-0.025497	-0.219917	-0.163326	-0.106285	0.328548	0.851215	-0.120979	-0.086702	-0.00224	0.03444	0.121363	-0.071929	0.110417	0.712548	0.945756	0.912406	0.90257	1.00418	1.09585	0.569392	0.556174	0.522733	16.8201	0	0	0	0	0	0	0	0	6.99761	0	0.605051	0	0	0	0	0	0	1.76967	9.36066	0.74896	0.47737	-0.03191	0
d97	0	0	-0.115701	-0.145877	-0.151872	-0.99456	-0.084522	-0.016935	1.32369	-0.039667	-0.042296	-0.037359	0.013899	0.084988	-0.057034	0.047771	0.482148	1.00648	0.966413	0.9443	1.02597	1.05061	0.538083	0.653071	0.574372	14.1094	0.205291	0	0	0	1.23933	0	0	0	6.9227	0	0.601605	0.453045	0.618889	0	0	0	0.62044	1.82172	9.32278	0.78548	0.50201	-0.05783	0
d98	0	0	0.265838	-0.825589	-0.362105	-0.471822	-0.127868	-0.078866	1.76426	0.081872	-0.109236	-0.035017	-0.047335	-0.020491	-0.080529	0.079616	0.691264	1.0348	1.02687	0.997243	1.05014	0.95861	0.790156	0.776337	0.699316	13.1142	0	0	0	0	1.70377	0	0	0	6.96899	0	0.61876	0.300543	0.851884	0	0	0	0.851884	2.39306	10.2633	0.80222	0.52691	-0.08473	0
d99	0	0	-0.350741	0.089075	-0.390218	1.19858	-0.098996	-0.211606	2.24599	-0.128434	-0.128812	0.044224	0.066829	0.081172	-0.060852	0.135138	0.69412	0.950574	0.92499	0.914795	1.02831	1.02283	0.515811	0.634669	0.663004	9.21797	0	0	0	0	0	0	0	0	7.2653	0	0.64661	0.295957	0	0	0	0	0	2.29969	9.93224	0.8098	0.53636	-0.09759	0
d100	0	0	0.070436	-0.388634	-0.165882	-0.620591	-0.18448	0.094113	1.74951	0.048427	-0.104384	0.049225	0.015076	0.107841	-0.114667	0.122812	0.648839	0.921201	0.972649	0.900247	1.04372	1.03755	0.94147	0.830935	0.659204	5.78658	0.033599	0	0	0	0.837824	0	0	0	7.18514	0	0.64974	0	0.837824	0	0	0	0.837824	0	0	0.8172	0.53237	-0.08984	0
d101	0	0	0.070436	-0.388634	-0.165882	-0.620591	-0.18448	0.094113	1.74951	0.048427	-0.104384	0.049225	0.015076	0.107841	-0.114667	0.122812	0.648839	0.921201	0.972649	0.900247	1.04372	1.03755	0.94147	0.830935	0.659204	5.78658	0.033599	0	0	0	0.837824	0	0	0	7.18514	0	0.64974	0	0.837824	0	0	0	0.837824	0	0	0.8172	0.53237	-0.08984	0
d102	0	0	-0.39203	-0.064417	-0.208352	0.23672	-0.056056	0.106344	1.26155	-0.115063	-0.052769	0.071204	0.101439	0.159791	-0.036358	-0.03218	0.701006	0.905804	0.925681	0.864604	1.00833	1.05089	0.557295	0.583425	0.577624	19.0455	0	0	0	0	0	0	0	0	6.91251	0	0.5997	0.288133	0	0	0	0	0	1.83223	9.34013	0.79083	0.50887	-0.06601	0
d103	0	0	-0.150705	0.05186	-0.000796	0.729245	-0.065297	0.002813	?	-0.199424	-0.000986	0.205713	0.130644	0.207014	-0.135791	0	0.627889	0.506917	0.624111	0.591919	1.00308	0.998862	0	0	0	9.50426	0.072333	0	0	0	0	0	0	0	0	0	0	0	0	0	0	0	0	0	0	0.73939	0.55439	-0.10772	0
d104	0	0	-0.059655	-0.057837	-0.061958	-0.197674	-0.310387	-0.520876	2.02767	-0.163417	-0.315881	-0.298434	-0.280046	-0.231143	-0.215969	0.062129	0.769671	1.35365	1.37213	1.28804	1.12073	0.786917	0.519956	0.558355	0.405838	2.98358	0.060664	1	0	0	0	0	0	0	0	0	0	0.342825	0	0	0	0	0	0	0	0.84583	0.51833	-0.085	0
d105	0	0	-0.197305	-0.006532	-0.102267	0.358114	-0.108926	-0.239181	1.31395	-0.151176	-0.07138	0.011492	0.043929	0.11094	-0.070335	-0.051171	0.802145	0.964277	0.982701	0.905393	1.01461	0.990282	0.57573	0.566546	0.584873	9.0054	0.09857	0	0	0	0.875243	0	0	0	7.26149	0	0.649134	0	0.437622	0	0	0	0.437622	1.79597	9.06819	0.77544	0.50074	-0.05734	0
d106	0	0	-0.164243	0.070806	-0.055262	0.166968	-0.086793	-0.217304	1.39277	-0.103676	-0.033849	-0.020581	0.043464	0.043848	-0.052535	0.071313	0.707099	0.939886	0.889818	0.943998	1.03329	1.0037	0.530896	0.572813	0.636743	7.85555	0.270447	0	0	0	0	0	0	0	7.25441	0	0.642191	0	0	0	0	0	0	1.79057	9.15284	0.79167	0.52868	-0.08053	0
d107	0	0	-0.126549	-0.075884	-0.101595	0.058194	-0.035589	-0.185411	1.33892	-0.076797	-0.059171	-0.077553	-0.019712	0.043699	-0.023531	0.052616	0.546132	1.04211	1.011	0.966275	0.994931	1.02617	0.524367	0.562571	0.556047	8.21276	0.132965	0	0	0	0	0	0	0	7.20839	0	0.640168	0.318378	0	0	0	0	0	1.79381	9.1252	0.79099	0.50881	-0.06512	0
d108	0	0	-0.252933	-0.107961	-0.259382	1.10309	0.101762	0.043855	1.02485	-0.066063	-0.050588	0.128895	0.139475	0.140439	0.070398	0.031683	0.660934	0.875265	0.875929	0.901689	0.972451	1.00022	0.48337	0.515147	0.512183	22.8025	0	0	0	0	0	0	0	0	6.20313	0	0.514335	0.265983	0	0	0	0	0	1.9047	9.76938	0.77652	0.49235	-0.05155	0
d109	0	0	-0.161352	0.085961	-0.234169	0.483375	-0.071296	-0.066143	?	-0.11893	-0.151842	0.076015	0.060114	0.038773	-0.131021	0	1.1565	0.878865	0.790327	1.08947	1.39802	1.64331	0	0	0	16.0321	0.026958	0	0	0	0	0	0	0	0	0	0	0	0	0	0	0	0	0	0	0.73506	0.56561	-0.1169	0
d110	0	0	-0.221566	-0.116852	0.022034	0.354414	0.030548	0.011604	1.93951	-0.166087	0.021021	-0.226959	-0.199058	-0.124033	0.019644	-0.06875	0.737834	1.20444	1.19757	1.14643	0.909673	0.930451	0.56002	0.577935	0.404901	3.29506	0.104439	0	0	0	0	0	0	0	7.72284	0	0.711118	0.36299	0	0	0	0	0	1.6522	8.79036	0.82424	0.53537	-0.09787	0
d111	0	0	-0.23068	-0.137715	-0.072331	0.340516	-0.115319	-0.00728	1.14587	-0.130879	-0.031648	-0.120121	-0.100831	-0.04956	-0.079578	0.033113	0.69841	1.08108	1.06849	1.04452	1.04857	1.01621	0.550158	0.506683	0.384354	9.74404	0.033559	0	0	0	0	0	0	0	7.48867	0	0.670884	0.40394	0	0	0	0	0	1.67415	9.03107	0.77045	0.49167	-0.0474	0
d112	0	0	-0.053709	-0.067439	-0.136978	0.629003	0.105002	-0.035116	0.833165	-0.018003	-0.041399	0.150222	0.155653	0.149545	0.073278	0.12392	1.04926	0.851874	0.904214	0.888188	0.974321	1.05917	0.625588	0.69369	0.703279	17.8843	0.219695	0	0	0	0	0	0	0	6.41091	0	0.53676	0.275918	0	0	0	0	0	1.90674	9.67783	0.7899	0.49715	-0.05673	0
d113	0	0	-0.151379	-0.08592	-0.123042	0.009233	-0.090413	0.006355	0.953203	-0.083955	-0.05478	0.006293	0.04242	0.121152	-0.060363	0.093396	0.622151	0.958049	0.931732	0.911384	1.02467	1.06002	0.49513	0.521415	0.531037	12.3089	0.088107	0	0	0	1.18856	0	0	0	6.99137	0	0.6123	0.283245	0.593506	0	0	0	0.595057	1.82659	9.25469	0.75769	0.4845	-0.04005	0
d114	0	0	-0.135312	-0.082114	-0.052537	-0.234335	-0.080804	0.026398	1.14554	-0.058611	-0.018314	0.005302	0.047296	0.124753	-0.053994	0.088672	0.599702	0.964208	0.930593	0.908737	1.02128	1.05663	0.532658	0.544815	0.541765	11.2813	0.085999	0	0	0	1.20509	0	0	0	6.99402	0	0.503395	0.389459	0.60177	0	0	0	0.603322	1.81752	9.25624	0.77107	0.49205	-0.04783	0
d115	0	0	-0.155199	0.01447	-0.151595	0.118393	-0.164394	0.037117	1.29707	-0.113505	-0.100522	-0.00423	0.021021	0.129375	-0.105561	-0.004083	0.640952	0.94778	1.02649	0.889689	1.0221	1.02426	0.560315	0.593587	0.615389	10.6779	0.057979	0	0	0	0	0	0	0	7.23161	0	0.645025	0	0	0	0	0	0	1.80933	9.09012	0.77642	0.50561	-0.06048	0
d116	0	0	-0.273404	-0.046788	-0.014307	0.064165	-0.163832	0.542777	1.06215	-0.147911	-0.00737	-0.035865	-0.003117	0.075364	-0.107869	0.058002	0.708869	1.00917	0.979024	0.932065	1.04864	1.06712	0.526504	0.498189	0.484066	10.7119	0	0	0	0	1.06651	0	0	0	7.13583	0	0.626135	0.43909	0.533257	0.370102	0	0	0.533257	1.75762	9.2269	0.76812	0.49226	-0.04623	0
d117	0	0	-0.350066	0.340091	0.209295	2.00193	-0.007097	0.002162	0.789562	-0.115916	0.063903	0.092192	0.102143	0.102436	-0.004947	0.011058	1.13253	0.896675	0.880041	0.913262	1.01373	0.994571	0.632152	0.645636	0.72673	19.5929	0	0	0	0	0	0	0	0	6.74409	0	0.578341	0.279282	0	0	0	0	0	1.87608	9.45244	0.78241	0.49296	-0.05179	0
d118	0	0	-0.239539	0.116435	-0.144943	-0.145413	-0.105267	-0.028999	1.35792	-0.077386	-0.044169	-0.130163	-0.078782	-0.02322	-0.07019	-0.081715	0.777225	1.09945	1.07463	1.02024	1.02384	0.949333	0.585334	0.780928	0.725554	11.1468	0	0	0	0	0	0	0	0	7.05503	0	0.615978	0.39751	0	0	0	0	0	1.78413	9.27404	0.79652	0.50663	-0.06331	0
d119	0	0	-0.239539	0.116435	-0.144943	-0.145413	-0.105267	-0.028999	1.35792	-0.077386	-0.044169	-0.130163	-0.078782	-0.02322	-0.07019	-0.081715	0.777225	1.09945	1.07463	1.02024	1.02384	0.949333	0.585334	0.780928	0.725554	11.1468	0	0	0	0	0	0	0	0	7.05503	0	0.615978	0.39751	0	0	0	0	0	1.78413	9.27404	0.79652	0.50663	-0.06331	0
d120	0	0	-0.239539	0.116435	-0.144943	-0.145413	-0.105267	-0.028999	1.35792	-0.077386	-0.044169	-0.130163	-0.078782	-0.02322	-0.07019	-0.081715	0.777225	1.09945	1.07463	1.02024	1.02384	0.949333	0.585334	0.780928	0.725554	11.1468	0	0	0	0	0	0	0	0	7.05503	0	0.615978	0.39751	0	0	0	0	0	1.78413	9.27404	0.79652	0.50663	-0.06331	0
d121	0	0	-0.286759	0.226508	-0.272677	0.861585	-0.187932	0.006923	2.10236	-0.150692	-0.175134	-0.112936	0.008165	0.029332	-0.113301	-0.0734	0.864513	1.04462	0.942748	0.959159	1.0571	0.84799	0.614707	0.729262	0.828335	4.83575	0.126753	0	0	0	0	0	0	0	7.4439	0	0.671235	0.385763	0	0	0	0	0	1.73487	8.98162	0.84546	0.56471	-0.12277	0
d122	0	0	-0.189621	0.200946	-0.032484	2.2504	0.055637	-0.023397	0.60117	-0.075032	-0.007941	0.164499	0.155829	0.143299	0.038434	-0.015202	0.98287	0.835916	0.844381	0.930761	1.04991	1.02895	0.437415	0.464544	0.490464	21.9745	0.119015	0	0	0	0	0	0	0	6.14554	0	0.509269	0.273083	0	0	0	0	0	1.94604	9.78286	0.7475	0.47463	-0.03049	0
d123	0	0	0.123573	-0.380327	-0.123065	0.220539	-0.025648	-0.120928	0.940072	0.063503	-0.045219	0.060063	0.039961	0.044476	-0.017531	0.0278	0.636789	0.946326	0.937186	0.975268	1.03642	1.02323	0.718556	0.647183	0.512269	12.6054	0.000874	0	0	0	0.836074	0	0	0	6.77479	0	0.596967	0.264269	0.836074	0	0	0	0.836074	0	0	0.76987	0.49089	-0.04842	0
d124	0	0	-0.151973	0.109501	0.10222	1.15458	0.082072	-0.151369	1.27369	-0.076226	0.050675	0.175735	0.212758	0.187115	0.054067	-0.075642	1.1869	0.800494	0.740419	0.809299	0.958805	1.02918	0.562888	0.604243	0.656937	9.53975	0.228213	0	0	0	0	0	0	0	7.01838	0	0.613107	0.271415	0	0	0	0	0	1.84187	9.2789	0.81579	0.52273	-0.08199	0
d125	0	0	0.035046	-0.242808	-0.160111	-0.864456	0.033355	-0.251828	1.49924	0.022145	-0.12837	-0.153008	-0.114566	-0.122643	0.020338	-0.035964	0.726458	1.11337	1.12835	1.13101	0.911956	0.922305	0.603625	0.968385	0.71811	5.53166	0.2785	0	0	0	0	0	0	0	7.28032	0	0.649744	0.358009	0	0	0	0	0	2.37717	9.78494	0.80625	0.525	-0.08278	0
d126	0	0	-0.133874	0.059275	-0.144288	0.250295	-0.032916	0.245275	1.29855	-0.101421	-0.104034	-0.022949	0.000394	0.096652	-0.021567	0.078559	0.60961	0.982972	0.97593	0.910235	0.951466	1.09576	0.558162	0.570951	0.510983	10.2656	0.034281	0	0	0	0	0	0	0	7.38769	0	0.664517	0	0	0	0	0	0	1.73971	9.00614	0.77167	0.50071	-0.05525	0
d127	0	0	-0.000609	-0.231565	-0.131108	0.095658	0.00522	0.001651	0.982526	-0.000241	-0.044948	0.069567	0.09305	0.07972	0.003345	-0.056938	0.744058	0.930119	1.00607	0.9818	1.03559	1.10539	0.577198	0.611331	0.590495	14.6315	0.008319	0	0	0	0	0	0	0	6.79134	0	0.586583	0.283693	0	0	0	0	0	1.86591	9.38587	0.79591	0.50633	-0.06471	0
d128	0	0	-0.025765	-0.166223	-0.181842	-0.901002	-0.024398	0.106992	1.35009	-0.014209	-0.089138	0.001944	0.026629	0.068397	-0.016282	0.286907	0.694028	0.899007	0.89422	0.963238	0.973007	1.00678	0.655761	0.98012	0.818049	10.0309	0.420337	0	0	0	0	0	0	0	7.0157	0	0.607149	0	0	0	0	0	0	0	0	0.7814	0.507	-0.05743	0
d129	0	0	-0.033193	-0.072296	0.365701	-0.319781	-0.051121	0.00989	1.09601	-0.012216	0.127049	0.088413	0.129103	0.148466	-0.034286	-0.119583	0.859783	0.902883	0.950905	0.895397	1.04652	1.0263	0.659331	0.661815	0.652868	11.8169	0.441173	0	0	0	0	0	0	0	7.02865	0	0.607043	0.290895	0	0	0	0	0	1.81728	9.37714	0.8141	0.51913	-0.07666	0
d130	0	0	-0.171557	0.022122	-0.149077	0.180247	-0.153995	0.053908	1.41445	-0.129706	-0.101775	0.005972	0.041043	0.142989	-0.099054	-0.002132	0.639834	0.941168	0.991364	0.879615	1.02083	1.06221	0.55941	0.583495	0.615181	8.94936	0.0244	0	0	0	0	0	0	0	7.29986	0	0.654134	0	0	0	0	0	0	1.79114	9.04634	0.77963	0.50556	-0.06156	0
d131	0	0	-0.244351	-0.097212	0.017623	0.138336	0.082814	-0.028213	1.1214	-0.113422	0.006857	0.0503	0.060182	0.089088	0.054125	0.027448	0.778704	0.882959	0.891287	0.976665	0.97615	1.1146	0.615316	0.642165	0.5404	10.8722	0.051746	0	0	0	0.477187	0	0	0	7.41888	0	0.653398	0.306881	0.477187	0	0	0	0.477187	1.68094	9.18133	0.80133	0.51425	-0.07139	0
d132	0	0	-0.245712	0.012455	-0.200145	0.429576	-0.226699	-0.11407	1.55393	-0.124586	-0.078649	-0.125123	-0.081056	-0.005523	-0.14536	0.095644	0.623721	1.07937	1.04578	0.967446	1.0718	0.965412	0.452232	0.476473	0.451363	9.7801	0.183123	0	0	0	0	0	0	0	7.02023	0	0.615594	0.412804	0	0	0	0	0	1.92755	9.23899	0.77083	0.50545	-0.06217	0
d133	0	0	-0.403698	-0.148367	-0.111336	0.211579	-0.024951	0.068118	1.2282	-0.115823	-0.028835	0.029706	0.065681	0.110404	-0.016925	0.053813	0.760017	0.95475	0.933354	0.908053	0.993608	1.04872	0.554693	0.576938	0.529291	18.4906	0.008616	0	0	0	0	0	0	0	6.98936	0	0.608498	0.284521	0	0	0	0	0	1.80245	9.30329	0.78186	0.49724	-0.05553	0
d134	0	0	-0.036197	-0.102465	-0.292647	-1.60897	-0.148038	-0.168902	2.52984	-0.017263	-0.129354	-0.07855	0.003968	0.089222	-0.092912	0.09226	0.375044	1.04542	1.00698	0.904708	1.00517	0.973527	0.571544	0.854246	0.709304	7.05624	0.164291	0	0	0	0	0	0	0	7.13501	0	0.63174	0	0	0	0	0	0	1.90294	9.00017	0.82593	0.54589	-0.10471	0
d135	0	0	-0.263346	-0.152317	-0.098841	0.346054	0.073775	0.01011	1.2209	-0.071669	-0.023123	0.148952	0.176485	0.167893	0.0469	-0.031187	0.740304	0.826893	0.858512	0.881642	0.962221	1.01997	0.536389	0.592654	0.58722	21.2001	0.207447	0	0	0	0	0	0	0	6.53195	0	0.551672	0.280361	0	0	0	0	0	1.88841	9.59437	0.79558	0.51649	-0.07277	0
d136	0	0	-0.162376	-0.05453	-0.238283	1.03932	0.048541	-0.201305	1.12454	-0.110685	-0.145869	0.168334	0.156508	0.175978	0.0319	-0.019417	0.677953	0.845871	0.836111	0.815625	0.928847	1.09744	0.533832	0.46568	0.513458	10.5603	0.234556	0	0	0	0	0	0	0	7.09937	0	0.627379	0.362621	0	0	0	0	0	1.82221	9.17401	0.76515	0.49679	-0.05013	0
d137	0	0	-0.162376	-0.05453	-0.238283	1.03932	0.048541	-0.201305	1.12454	-0.110685	-0.145869	0.168334	0.156508	0.175978	0.0319	-0.019417	0.677953	0.845871	0.836111	0.815625	0.928847	1.09744	0.533832	0.46568	0.513458	10.5603	0.234556	0	0	0	0	0	0	0	7.09937	0	0.627379	0.362621	0	0	0	0	0	1.82221	9.17401	0.76515	0.49679	-0.05013	0
d138	0	0	-0.151711	-0.017434	-0.077039	-0.006759	0.08531	-0.063674	1.12238	-0.074209	-0.034879	0.075181	0.116076	0.078696	0.053784	0.08461	0.760884	0.891438	0.846975	0.917575	0.937844	1.00667	0.521917	0.595836	0.617272	10.4507	0.013629	0	0	0	0	0	0	0	7.14463	0	0.627525	0.273211	0	0.583642	0	0	0	1.80347	9.22475	0.79048	0.51652	-0.07133	0
d139	0	0	-0.168864	0.10065	-0.086278	0.754115	-0.188671	-0.442959	1.45527	-0.145086	-0.081542	0.157614	0.16044	0.199913	-0.11039	0.027189	0.888845	0.853731	0.973264	0.831558	1.19845	1.23778	0.501802	0.600696	0.663026	9.00055	0.053473	0	0	0	0	0	0	0	7.19951	0	0.646029	0.229655	0	0	0	0	0	1.82797	9.0415	0.80707	0.53241	-0.09346	0
d140	0	0	-0.124632	-0.037911	0.09847	0.557789	0.080441	-0.124439	0.759012	-0.050392	0.030055	0.158203	0.165288	0.176797	0.056136	-0.011728	0.964898	0.819549	0.826564	0.830226	0.9368	0.988362	0.539516	0.597949	0.607143	18.8325	0.143694	0	0	0	0.921766	0	0	0	6.44022	0	0.539781	0.278016	0.460883	0	0	0	0.460883	1.89848	9.66734	0.75662	0.48215	-0.03688	0
d141	0	0	0.149908	-0.163504	0.013835	0.863753	0.005447	-0.340941	1.96943	0.066494	0.004631	0.056914	0.05463	0.115706	0.003523	-0.038376	0.732138	0.833016	0.850208	0.941093	0.983016	0.900528	0.544799	0.575332	0.47414	7.07568	0.202166	0	0	0	0	0	0	0	7.23778	0	0.617235	0	0	0	0	0	0	0	0	0.82191	0.54035	-0.09298	0
d142	0	0	0.112684	-0.425208	-0.167621	-0.594446	-0.195599	0.010862	1.66925	0.079457	-0.110569	-0.013014	-0.025961	0.055199	-0.122949	0.107047	0.578992	0.978938	1.00333	0.945943	1.05743	1.01484	0.929417	0.829976	0.645418	6.24687	0.031168	0	0	0	0.839911	0	0	0	7.1508	0	0.64483	0	0.839911	0	0	0	0.839911	0	0	0.8101	0.52444	-0.08251	0
d143	0	0	-0.186357	0.045269	0.006578	0.567772	-0.069955	0.025856	1.24162	-0.130157	0.003857	0.096956	0.102332	0.158316	-0.046575	-0.027838	0.675057	0.897641	0.991979	0.876761	1.03846	1.08125	0.504071	0.505348	0.566902	8.80125	0.148764	0	0	0	0.497791	0	0	0	6.94325	0	0.608102	0.272722	0.497791	0	0	0	0.497791	1.83955	9.25561	0.77027	0.49121	-0.05026	0
d144	0	0	-0.171557	0.022122	-0.149077	0.180247	-0.153995	0.053908	1.41445	-0.129706	-0.101775	0.005972	0.041043	0.142989	-0.099054	-0.002132	0.639834	0.941168	0.991364	0.879615	1.02083	1.06221	0.55941	0.583495	0.615181	8.94936	0.0244	0	0	0	0	0	0	0	7.29986	0	0.654134	0	0	0	0	0	0	1.79114	9.04634	0.77963	0.50556	-0.06156	0
d145	0	0	-0.147516	0.028808	-0.162079	0.18898	-0.074441	-0.029208	1.29855	-0.105693	-0.096539	-0.032805	0.00349	0.077682	-0.048776	-0.005426	0.620764	0.966464	0.998647	0.943287	0.992949	1.01468	0.542538	0.570187	0.590648	9.72195	0.150442	0	0	0	0	0	0	0	7.24407	0	0.645789	0	0	0	0	0	0	1.7998	9.09303	0.77167	0.50071	-0.05525	0
d146	0	0	-0.215214	-0.078089	0.026124	0.731326	0.10532	-0.158243	0.760844	-0.095282	0.005572	0.120205	0.128179	0.134696	0.074894	0.016194	0.828467	0.819158	0.817235	0.843902	0.884991	0.975183	0.576219	0.471358	0.354533	14.1629	0	0	0	0	3.06708	0	0	0	6.34282	0	0.52079	0	0.501537	0	0	0	0.516	1.83577	9.85215	0.74079	0.47632	-0.0273	0
d147	0	0	-0.057808	-0.074981	-0.12883	-0.11297	-0.049145	-0.157944	1.12995	-0.03046	-0.046764	0.037735	0.051503	0.070058	-0.032999	0.076761	0.483359	0.953947	0.944963	0.9239	0.999678	0.956127	0.429465	0.59793	0.51716	13.3326	0.07657	0	0	0	0	0	0	0	6.47312	0	0.551696	0.282844	0	0	0	0	0	2.02823	9.35586	0.75769	0.4874	-0.04494	0
d148	0	0	-0.182167	-0.065116	0.0222	0.346785	-0.180492	-0.017684	0.854744	-0.104259	0.012109	-0.127924	-0.096755	-0.062966	-0.125356	0.007775	0.704526	1.09723	1.03699	1.03627	1.08513	1.02469	0.529746	0.532156	0.58942	14.9139	0	0	0	0	0	0	0	0	7.09696	0	0.624875	0.447409	0	0	0	0	0	1.79603	9.20228	0.74127	0.47707	-0.0297	0
d149	0	0	-0.210801	-0.08439	-0.054832	-0.017436	0.064684	0.13985	0.883313	-0.092807	-0.022076	0.097929	0.126815	0.157342	0.045525	0.078681	0.860275	0.879341	0.856871	0.849395	0.934416	1.05517	0.588758	0.623251	0.552528	15.4471	0.383613	0	0	0	0	0	0	0	7.36719	0	0.656085	0.279035	0	0	0	0	0	3.38466	9.08697	0.76042	0.47967	-0.03745	0
d150	0	0	-0.107519	-0.023025	-0.158115	-0.097251	-0.064944	0.160802	0.765341	-0.050402	-0.061499	0.003956	0.03908	0.105931	-0.043757	0.088296	0.808019	0.950447	0.937364	0.908263	0.999626	1.06623	0.517595	0.542345	0.501425	17.0804	0.037207	0	0	0	0	0	0	0	6.70171	0	0.571544	0.294753	0	0	0	0	0	1.84669	9.49882	0.74658	0.48011	-0.03189	0
d151	0	0	-0.182398	-0.19107	-0.205427	0.209646	0.068635	-0.106554	1.26115	-0.091261	-0.071158	0.048877	0.054611	0.099138	0.047545	0.05978	0.67746	0.924835	0.931032	0.951351	0.960096	1.07397	0.522317	0.506716	0.357754	8.88785	0.091055	0	0	0	0	0	0	0	7.34318	0	0.648136	0.286205	0	0.361088	0	0	0	1.70766	9.16675	0.79915	0.50932	-0.0662	0
d152	0	0	-0.133037	0.020737	0.053299	1.65825	0.02578	-0.109434	0.75633	-0.066429	0.020965	0.145272	0.149342	0.115888	0.016839	-0.02784	0.648918	0.875267	0.946229	0.907206	0.992637	0.976485	0.445612	0.497211	0.568695	19.5647	0.145407	0	0	0	1.01708	0	0	0	5.98545	0	0.493849	0.258223	0.500122	0.631642	0	0	0.516955	1.99334	9.83075	0.76995	0.49744	-0.05327	0
d153	0	0	-0.172607	-0.01925	-0.067589	0.364214	-0.185731	-0.189054	1.49197	-0.118764	-0.048308	0.037555	0.074587	0.15736	-0.120678	0.124812	0.676052	0.945597	0.919236	0.853885	1.06523	1.05685	0.470734	0.501229	0.55002	6.56688	0.221754	0	0	0	0.950938	0	0	0	7.26606	0	0.651438	0.365737	0.417076	0.541354	0	0	0.533863	1.79216	9.04215	0.78387	0.51127	-0.06539	0
d154	0	0	-0.09492	0.227807	-0.017484	0.232103	0.072005	0.02107	0.762809	-0.037892	-0.005106	0.073218	0.090747	0.084468	0.045209	0.016689	0.879554	0.873541	0.854949	0.947448	0.952062	1.02008	0.631179	0.609674	0.718816	19.8369	0.007846	0	0	0	0	0	0	0	-0.913012	0	0	0.322716	0	0.449736	0	0	0	1.97375	9.49462	0.75625	0.49211	-0.04532	0
d155	0	0	0.053598	-0.1586	-0.192103	-0.66665	0.052083	-0.111731	1.32599	0.030575	-0.110333	-0.025573	-0.012672	-0.02734	0.033774	-0.021245	0.646728	0.998898	0.96551	1.03654	0.946217	0.998207	0.577938	0.909714	0.793696	7.81595	0.048258	0	0	0	0	0	0	0	7.36308	0	0.667567	0.273806	0	0	0	0	0	2.43822	10.0316	0.8018	0.51589	-0.07494	0
d156	0	0	-0.200936	0.01273	-0.121694	0.749663	-0.032045	-0.272158	1.47622	-0.1439	-0.107706	-0.04883	-0.004694	0.004205	-0.020214	-0.047662	0.562113	1.05388	0.994348	0.961607	0.957447	0.916508	0.508728	0.454676	0.492781	6.65915	0.211197	0	0	0	0.448574	0	0	0	7.28001	0	0.655065	0.342629	0.448574	0.557544	0	0	0.448574	1.79447	9.011	0.79247	0.51502	-0.07249	0
d157	0	0	-0.18056	0.057493	-0.027905	0.200557	-0.232652	0.131902	1.31395	-0.138032	-0.0164	0.011655	0.008659	0.116167	-0.150226	-0.184755	0.657345	0.970579	1.16022	0.928507	1.10557	1.13353	0.580248	0.542191	0.58947	8.46299	0.033692	0	0	0	0.959591	0	0	0	7.10128	0	0.628509	0	0.476116	0	0	0	0.483474	1.82199	9.15976	0.77544	0.50074	-0.05734	0
d158	0	0	-0.244795	0.013825	-0.197588	0.668982	0.017902	-0.038284	0.632143	-0.099644	-0.067467	0.089842	0.099061	0.141827	0.011727	-0.053531	0.930825	0.915797	0.964944	0.925276	1.06373	1.11658	0.476133	0.530451	0.582955	21.009	0.097233	0	0	0	0.478202	0	0	0	6.59929	0	0.565643	0.270574	0.478202	0	0	0	0.478202	1.89425	9.46109	0.76579	0.4883	-0.04756	0
d159	0	0	-0.193707	0.01392	-0.18913	0.019029	-0.074596	0.087351	0.940632	-0.111308	-0.084658	0.047808	0.106435	0.171094	-0.04898	-0.039451	0.690612	0.896139	0.956519	0.85847	0.976386	1.05234	0.577258	0.576473	0.604534	15.2569	0	0	0	0	0	0	0	0	6.46765	0	0.542788	0	0	0	0	0	0	1.92687	9.65899	0.75889	0.48989	-0.04354	0
d160	0	0	-0.161964	-0.028152	-0.209724	-0.093801	-0.076001	0.136263	0.858537	-0.088795	-0.09087	0.030181	0.067664	0.148646	-0.049745	0.003398	0.639361	0.907998	0.996869	0.873186	0.967211	1.00478	0.583052	0.600414	0.612177	18.7139	0	0	0	0	0	0	0	0	6.82623	0	0.589294	0	0	0	0	0	0	1.87353	9.39243	0.7581	0.49202	-0.04465	0
d161	0	0	-0.202765	0.070915	-0.05276	0.289098	-0.059541	0.003797	1.05442	-0.116397	-0.027163	0.084805	0.086619	0.077566	-0.036898	0.037427	0.751005	0.87272	0.955912	0.985899	1.07412	1.0498	0.558933	0.614273	0.671751	11.2617	0.015154	0	0	0	0	0	0	0	7.03543	0	0.61381	0.292017	0	0	0	0	0	1.81812	9.28705	0.77974	0.50734	-0.06266	0
d162	0	0	-0.305808	0.005066	0.019783	1.42655	-0.204169	-0.098563	2.32231	-0.156684	0.009098	0.022617	-0.018699	-0.053334	-0.086078	0.008607	0.773316	0.899618	1.07171	1.09442	1.18748	1.07087	0.639993	0.834319	0.993766	8.59914	0.058634	0	0	0	0	0	0	0	7.36586	0	0.652717	0	0	0	15.9054	0	0	1.66692	9.12158	0.83394	0.55095	-0.10522	0
d163	0	0	-0.171884	0.040093	0.007104	1.68486	0.070567	-0.085266	0.739348	-0.08401	0.002607	0.179362	0.17745	0.148587	0.046209	-0.027332	0.671976	0.83605	0.917576	0.877505	0.965096	0.995919	0.464389	0.499778	0.567763	21.0286	0.19039	0	0	0	1.0261	0	0	0	5.96437	0	0.491221	0.261494	0.506145	0.624753	0	0	0.51996	1.9935	9.84788	0.76622	0.49319	-0.04965	0
d164	0	0	-0.349595	0.136986	-0.246795	0.746811	-0.0708	0.104525	1.75909	-0.144077	-0.084533	-0.010016	0.022541	0.117128	-0.046457	0.090405	0.661004	0.987107	1.06412	0.892776	0.984946	1.01549	0.551089	0.545538	0.472912	12.0922	0.186928	0	0	0	0	0	0	0	7.11634	0	0.623288	0	0	0	0	0	0	1.7404	9.23932	0.78727	0.5127	-0.06891	0
d165	0	0	-0.169816	-0.082176	-0.236118	0.235597	-0.066479	-0.177313	1.04066	-0.100647	-0.106293	-0.153922	-0.118188	-0.085293	-0.043929	0.007689	0.707096	1.10934	1.1204	1.08148	1.01262	1.01121	0.505227	0.509342	0.444497	11.4854	0.012708	0	0	0	0	0	0	0	7.08174	0	0.620987	0.397547	0	0	0	0	0	1.78538	9.23711	0.7625	0.48974	-0.04429	0
d166	0	0	-0.123806	0.026735	0.017023	0.866488	-0.033637	-0.176948	0.830611	-0.074049	0.009014	0.097558	0.110814	0.129544	-0.022517	-0.077556	0.668568	0.932294	1.04691	0.917375	1.06154	1.03001	0.467399	0.499377	0.568578	14.9852	0.671172	0	0	0	1.40142	0	0	0	6.28984	0	0.531612	0.263636	0.459698	0	0	0	0.475271	1.9583	9.59976	0.75697	0.48346	-0.04152	0
d167	0	0	-0.123806	0.026735	0.017023	0.866488	-0.033637	-0.176948	0.830611	-0.074049	0.009014	0.097558	0.110814	0.129544	-0.022517	-0.077556	0.668568	0.932294	1.04691	0.917375	1.06154	1.03001	0.467399	0.499377	0.568578	14.9852	0.671172	0	0	0	1.40142	0	0	0	6.28984	0	0.531612	0.263636	0.459698	0	0	0	0.475271	1.9583	9.59976	0.75697	0.48346	-0.04152	0
d168	0	0	-0.186413	0.040112	-0.19526	0.439872	-0.140843	0.032683	1.21829	-0.116281	-0.104663	0.033056	0.061269	0.137224	-0.096535	-0.002984	0.766389	0.944535	0.91234	0.867458	1.03947	1.06729	0.482833	0.505106	0.458904	8.10765	0.213427	0	0	0	0.582669	0	0	0	7.108	0	0.626767	0.399764	0.582669	0.38864	0	0	0.582669	1.78455	9.18719	0.75983	0.48877	-0.04298	0
d169	0	0	-0.283852	0.042205	-0.051236	0.593202	0.231323	0.031029	1.27869	-0.084729	-0.011022	0.15035	0.184785	0.203459	0.158682	0.036471	0.594353	0.827992	0.80579	0.779612	0.822161	0.924516	0.490483	0.520941	0.510699	17.3433	0	0	0	0	0	0	0	0	6.34609	0	0.527733	0.292115	0	0.494438	0	0	0	1.89183	9.73876	0.77807	0.50185	-0.05709	0
d170	0	0	-0.187278	0.02864	-0.102846	0.243415	-0.141463	0.139169	1.56093	-0.14651	-0.072276	0.014882	0.058704	0.153033	-0.091656	0.132075	0.637466	0.93504	0.946858	0.871171	1.02435	1.10078	0.559674	0.573777	0.614343	6.67845	0.043651	0	0	0	0	0	0	0	7.39858	0	0.667198	0	0	0	0	0	0	1.76018	8.98583	0.78387	0.50548	-0.06295	0
d171	0	0	-0.108934	-0.018323	-0.133832	0.05144	0.197223	0.022778	1.26085	-0.076627	-0.083744	-0.028707	0.012299	0.113349	0.128115	0.068314	0.354393	0.993886	0.89136	0.888875	0.805048	1.01966	0.496682	0.647533	0.240564	9.49873	0.007551	0	0	0	0.450995	0	0	0	8.44395	0	0.878819	0.450995	0.450995	0	0	0	0.450995	1.37037	7.77482	0.77167	0.49252	-0.05217	0
d172	0	0	-0.192159	-0.130366	-0.188503	0.890271	0.025185	-0.025336	0.765889	-0.100835	-0.089924	0.110365	0.119854	0.137139	0.017058	0.006663	0.726014	0.885825	0.871895	0.867478	0.962677	1.067	0.519461	0.501215	0.53202	17.0934	0.345509	0	0	0	0	0	0	0	6.9576	0	0.609627	0.234747	0	0	0	0	0	1.83805	9.25288	0.75185	0.47792	-0.03554	0
d173	0	0	-0.213566	0.062454	-0.106931	0.877172	-0.294851	-0.163435	1.03991	-0.115091	-0.05179	-0.113338	-0.077093	-0.064951	-0.201386	0.063919	0.838389	1.082	1.02604	1.03945	1.18053	0.923783	0.555618	0.508878	0.575478	12.1143	0.257467	0	0	0	0	0	0	0	7.09938	0	0.6215	0.473307	0	0	0	0	0	1.7973	9.25326	0.76474	0.49489	-0.04632	0
d174	0	0	-0.158669	0.045437	-0.022229	0.733806	-0.074172	-0.057412	?	-0.222749	-0.041955	0.243512	0.152078	0.250814	-0.149814	0	0.745991	0.46105	0.573072	0.506646	0.884049	1.02397	0	0	0	8.62117	0	0	0	0	0	0	0	0	0	0	0	0	0	0	0	0	0	0	0	0.74063	0.54737	-0.10024	0
d175	0	0	-0.16064	-0.060859	-0.269031	1.18373	0.106681	-0.136219	0.828575	-0.0975	-0.137429	0.151553	0.148839	0.157242	0.072712	-0.091069	0.748774	0.860152	0.92187	0.857573	0.948015	1.1451	0.507161	0.477787	0.527242	14.8059	0.609992	0	0	0	0.982704	0	0	0	6.13281	0	0.513119	0.27148	0.483848	0	0	0	0.498856	1.97706	9.69586	0.75119	0.48048	-0.03689	0
d176	0	0	-0.16064	-0.060859	-0.269031	1.18373	0.106681	-0.136219	0.828575	-0.0975	-0.137429	0.151553	0.148839	0.157242	0.072712	-0.091069	0.748774	0.860152	0.92187	0.857573	0.948015	1.1451	0.507161	0.477787	0.527242	14.8059	0.609992	0	0	0	0.982704	0	0	0	6.13281	0	0.513119	0.27148	0.483848	0	0	0	0.498856	1.97706	9.69586	0.75119	0.48048	-0.03689	0
d177	0	0	-0.117502	0.064407	-0.060843	1.1579	0.050681	-0.135734	0.766447	-0.066347	-0.027662	0.144585	0.154513	0.146491	0.033556	-0.073609	0.721219	0.872431	0.984011	0.891165	1.00792	1.0713	0.480705	0.504441	0.557723	17.6769	0.745863	0	0	0	1.41723	0	0	0	6.13906	0	0.513787	0.268101	0.465864	0	0	0	0.480253	1.98145	9.69534	0.75313	0.48354	-0.03972	0
d178	0	0	-0.117502	0.064407	-0.060843	1.1579	0.050681	-0.135734	0.766447	-0.066347	-0.027662	0.144585	0.154513	0.146491	0.033556	-0.073609	0.721219	0.872431	0.984011	0.891165	1.00792	1.0713	0.480705	0.504441	0.557723	17.6769	0.745863	0	0	0	1.41723	0	0	0	6.13906	0	0.513787	0.268101	0.465864	0	0	0	0.480253	1.98145	9.69534	0.75313	0.48354	-0.03972	0
d179	0	0	-0.030853	0.024268	0.046642	1.55624	0.278056	-0.076856	0.816688	-0.012539	0.014543	0.153958	0.144241	0.145125	0.184998	0.009979	0.9786	0.822858	0.833163	0.865215	0.819158	1.01747	0.498864	0.647814	0.701433	16.8147	0.292465	0	0	0	0	0	0	0	6.32253	0	0.530203	0.270079	0	0.499391	0	0	0	1.95231	9.67148	0.77708	0.49827	-0.05445	0
d180	0	0	-0.135604	0.033235	-0.091043	1.05607	0.187006	-0.02965	0.811595	-0.068218	-0.037386	0.113936	0.119922	0.059522	0.120552	-0.083041	0.847325	0.880054	0.937911	0.997858	0.92971	1.03128	0.485129	0.548104	0.615915	16.4017	0.362943	0	0	0	0.517384	0	0	0	6.15905	0	0.513207	0.27596	0.517384	0.566502	0	0	0.517384	1.97757	9.73444	0.76989	0.49819	-0.054	0
d181	0	0	-0.186413	0.040112	-0.19526	0.439872	-0.140843	0.032683	1.21829	-0.116281	-0.104663	0.033056	0.061269	0.137224	-0.096535	-0.002984	0.766389	0.944535	0.91234	0.867458	1.03947	1.06729	0.482833	0.505106	0.458904	8.10765	0.213427	0	0	0	0.582669	0	0	0	7.108	0	0.626767	0.399764	0.582669	0.38864	0	0	0.582669	1.78455	9.18719	0.75983	0.48877	-0.04298	0
d182	0	0	-0.247445	0.223636	-0.223835	1.71759	-0.118381	-0.11829	1.60888	-0.18388	-0.189622	0.158378	0.108434	0.074828	-0.081574	-0.029547	0.865976	0.852003	0.88101	0.8456	1.06351	1.12826	0.551952	0.367212	1.22173	4.61374	0.189819	0	0	0	1.04386	0	0	0	6.9603	0	0.616932	0.381074	0.490637	0	0	0	0.55322	1.82689	9.14389	0.79333	0.50219	-0.0652	0
d183	0	0	-0.044943	0.022777	-0.184862	0.143032	-0.051398	-0.200304	1.20901	-0.027258	-0.098405	0.050732	0.074112	0.082564	-0.032183	-0.004259	0.790658	0.857021	0.884603	0.957859	1.05189	1.09465	0.505904	0.568984	0.603133	10.9961	0.415183	0	0	0	0	0	0	0	7.13135	0	0.63057	0.334656	0	0	0	0	0	1.82712	9.16984	0.77852	0.51533	-0.06657	0
d184	0	0	-0.242719	0.072149	0.015905	1.09265	0.088648	-0.098488	1.46111	-0.074849	0.003849	0.19856	0.206002	0.216186	0.060159	0.025481	0.778051	0.780884	0.799037	0.776893	0.93464	0.978268	0.472611	0.524906	0.550714	14.2975	0	0	0	0	0	0	0	0	6.58125	0	0.556536	0.278492	0	0	0	0	0	1.86309	9.57785	0.79271	0.51306	-0.06924	0
d185	0	0	-0.164208	-0.065551	0.040872	-0.094221	0.202505	-0.02578	0.691599	-0.063616	0.011194	0.126634	0.155361	0.173911	0.142059	0.022646	0.738092	0.85036	0.830193	0.824657	0.840959	0.944495	0.564932	0.608134	0.575164	21.8783	0.076287	0	0	0	0.936621	0	0	0	6.19867	0	0.510979	0.29166	0.468311	0.512012	0	0	0.468311	1.92722	9.82825	0.74863	0.47736	-0.03144	0
d186	0	0	-0.278321	-0.077926	-0.004498	0.141074	-0.003211	0.044948	0.860102	-0.110046	-0.001584	0.144818	0.167106	0.100495	-0.002152	0.005529	0.894421	0.83916	0.836535	0.950221	1.07172	1.08989	0.593805	0.636801	0.65078	16.1902	0.335086	0	0	0	0	0	0	0	6.75664	0	0.576647	0.279198	0	0	0	0	0	1.84943	9.49142	0.78333	0.49957	-0.05735	0
d187	0	0	-0.12163	0.039503	-0.04561	1.03024	0.023464	-0.133105	0.654366	-0.063348	-0.019796	0.150845	0.151062	0.177568	0.01545	-0.057053	0.725308	0.867271	0.992929	0.866201	1.00996	1.04034	0.50491	0.544154	0.579973	23.7574	0.043459	0	0	0	1.84433	0	0	0	6.16828	0	0.517164	0.264419	0.451633	0	0	0	0.476986	1.97689	9.67827	0.74917	0.47967	-0.03681	0
d188	0	0	0.108003	-0.388786	-0.05382	-0.547981	-0.097761	-0.03577	1.22531	0.069117	-0.02606	0.02423	0.010752	0.086809	-0.062509	0.054893	0.603465	0.915735	0.916548	0.88442	0.971161	0.981058	0.908819	0.805608	0.61873	11.2192	0.153774	0	0	0	0.855392	0	0	0	6.69978	0	0.583033	0	0.855392	0	0	0	0.855392	0	0	0.78503	0.51032	-0.06514	0
d189	0	0	-0.150356	-0.026757	-0.116286	-0.046702	-0.166303	-0.062464	1.38067	-0.098922	-0.061115	0.048341	0.136697	0.19056	-0.105739	0.07877	0.702127	0.906314	0.838316	0.857777	1.08814	1.00546	0.555826	0.579763	0.568318	7.32114	0.021193	0	0	0	0	0	0	0	7.20307	0	0.639663	0.502044	0	0	0	0	0	1.78368	9.12371	0.78333	0.50964	-0.06564	0
d190	0	0	-0.199499	0.103685	-0.127553	0.414153	-0.087747	0.192208	1.10596	-0.128486	-0.058678	0.033526	0.064623	0.130088	-0.06122	0.097734	0.694638	0.89851	0.871168	0.844658	0.970816	1.12902	0.529803	0.502516	0.452469	11.1328	0.087946	0	0	0	0	0	0	0	7.19374	0	0.633593	0	0	0	0	0	0	1.75142	9.19228	0.75072	0.48187	-0.03584	0
d191	0	0	-0.19022	0.047417	-0.003239	0.357774	-0.113636	0.141292	1.10693	-0.124546	-0.001568	0.004251	0.038206	0.107012	-0.077644	0.052543	0.649682	0.921503	0.870686	0.863285	0.986393	1.07622	0.53305	0.527627	0.562683	10.8636	0.096631	0	0	0	0	0	0	0	7.15688	0	0.631882	0	0	0	0	0	0	1.79469	9.17728	0.75532	0.48609	-0.04035	0
d192	0	0	-0.150356	-0.026757	-0.116286	-0.046702	-0.166303	-0.062464	1.38067	-0.098922	-0.061115	0.048341	0.136697	0.19056	-0.105739	0.07877	0.702127	0.906314	0.838316	0.857777	1.08814	1.00546	0.555826	0.579763	0.568318	7.86355	0.021193	0	0	0	0	0	0	0	7.20307	0	0.639663	0.502044	0	0	0	0	0	1.78368	9.12371	0.78333	0.50964	-0.06564	0
d193	0	0	-0.108506	0.010713	0.039395	1.62759	0.02667	-0.100139	0.75567	-0.053664	0.015366	0.153544	0.147726	0.124058	0.017171	-0.02562	0.651276	0.867305	0.953311	0.900217	0.991661	0.986876	0.45694	0.50194	0.564417	19.6145	0.173937	0	0	0	1.01047	0	0	0	5.96596	0	0.491835	0.256941	0.494617	0.634968	0	0	0.515852	1.99764	9.83942	0.77269	0.5002	-0.0562	0
d194	0	0	-0.162365	0.001746	-0.080057	0.312819	-0.18766	-0.180676	0.937537	-0.097173	-0.037016	-0.123001	-0.091138	-0.051875	-0.129333	0.080465	0.690989	1.06618	1.04121	1.02039	1.08713	1.00648	0.499423	0.509671	0.538903	13.3523	0.323316	0	0	0	0	0	0	0	6.9108	0	0.601281	0.411445	0	0	0	0	0	1.83376	9.31452	0.74643	0.48116	-0.03379	0
d195	0	0	-0.162365	0.001746	-0.080057	0.312819	-0.18766	-0.180676	0.937537	-0.097173	-0.037016	-0.123001	-0.091138	-0.051875	-0.129333	0.080465	0.690989	1.06618	1.04121	1.02039	1.08713	1.00648	0.499423	0.509671	0.538903	13.3523	0.323316	0	0	0	0	0	0	0	6.9108	0	0.601281	0.411445	0	0	0	0	0	1.83376	9.31452	0.74643	0.48116	-0.03379	0
d196	0	0	-0.175052	0.03123	-0.075379	1.21011	-0.047898	0.076977	0.56953	-0.081595	-0.025279	0.050106	0.044275	0.045065	-0.033225	0.043743	0.795099	0.961738	0.98143	0.973098	1.03899	1.00512	0.464429	0.489017	0.532283	25.4138	0.337184	0	0	0	0.510386	0	0	0	6.45589	0	0.547634	0.254132	0.510386	0	0	0	0.510386	1.91632	9.5599	0.73561	0.46962	-0.02535	0
d197	0	0	-0.264918	0.094894	-0.257873	0.250386	-0.022441	-0.216303	1.53203	-0.094497	-0.06732	0.063094	0.085708	0.140457	-0.013874	0.01293	0.643513	0.862792	0.9143	0.92244	1.00945	0.990122	0.524718	0.571303	0.592127	15.8424	0.043909	0	0	0	0	0	0	0	6.84987	0	0.590928	0.37303	0	0	0	0	0	1.84141	9.39216	0.79293	0.52132	-0.07626	0
d198	0	0	-0.152637	-0.078071	0.022145	-0.420057	-0.151951	0.045899	0.951976	-0.08258	0.01003	-0.024527	0.03587	0.122647	-0.098377	0.006914	0.77574	0.923378	0.915363	0.883939	1.02089	1.07815	0.52068	0.551236	0.582795	14.436	0.337017	0	0	0	0	0	0	0	6.98865	0	0.609183	0	0	0	0	0	0	1.84767	9.30064	0.76448	0.50095	-0.04939	0
d199	0	0	-0.213069	0.099129	-0.228935	-0.207728	-0.099138	-0.05367	1.29916	-0.067705	-0.068597	-0.122677	-0.063768	-0.015695	-0.065342	-0.129329	0.78347	1.0875	1.06364	1.00876	1.01512	0.933385	0.587459	0.788151	0.731152	12.9237	0	0	0	0	0	0	0	0	7.03179	0	0.614705	0.39761	0	0	0	0	0	1.80926	9.2676	0.79352	0.50659	-0.06259	0
d200	0	0	-0.213069	0.099129	-0.228935	-0.207728	-0.099138	-0.05367	1.29916	-0.067705	-0.068597	-0.122677	-0.063768	-0.015695	-0.065342	-0.129329	0.78347	1.0875	1.06364	1.00876	1.01512	0.933385	0.587459	0.788151	0.731152	12.9237	0	0	0	0	0	0	0	0	7.03179	0	0.614705	0.39761	0	0	0	0	0	1.80926	9.2676	0.79352	0.50659	-0.06259	0
d201	0	0	-0.213069	0.099129	-0.228935	-0.207728	-0.099138	-0.05367	1.29916	-0.067705	-0.068597	-0.122677	-0.063768	-0.015695	-0.065342	-0.129329	0.78347	1.0875	1.06364	1.00876	1.01512	0.933385	0.587459	0.788151	0.731152	12.9237	0	0	0	0	0	0	0	0	7.03179	0	0.614705	0.39761	0	0	0	0	0	1.80926	9.2676	0.79352	0.50659	-0.06259	0
d202	0	0	0.121158	-0.546038	-0.004165	-0.724857	-0.007344	-0.063612	2.43135	0.034758	-0.001253	-0.114819	-0.125161	-0.114125	-0.004422	-0.20743	0.749724	1.12519	1.20535	1.10188	0.977874	0.903203	0.925407	0.749587	0.895354	4.62313	0.492903	0	0	0	4.0101	0	0	0	6.54675	0	0.565281	0.366372	0.636853	-0.37102	0	0	0.871982	0	0	0.86994	0.58779	-0.14513	0
d203	0	0	-0.150316	0.136137	0.155446	0.661066	-0.018731	-0.332321	1.56454	-0.112652	0.126411	-0.091843	-0.073374	-0.005646	-0.012376	-0.19799	0.560519	1.10583	1.09302	0.982091	0.935451	0.897648	0.569065	0.508322	0.570197	4.05545	0	0	0	0	0	0	0	0	7.36891	0	0.66242	0	0	0	0	0	0	1.71153	9.00598	0.80123	0.50505	-0.06834	0
d204	0	0	-0.267503	-0.039329	0.196196	0.474113	-0.246449	0.189195	1.18612	-0.146976	0.103987	0.171706	0.160957	0.233739	-0.161536	-0.092774	0.70135	0.834881	0.884752	0.785099	1.16553	1.16955	0.618544	0.477081	0.594146	9.84174	0.135906	0	0	0	1.03703	0	0	0	6.78684	0	0.589871	0.339738	0.495211	0.520794	0	0	0.541818	1.89508	9.33303	0.78862	0.51088	-0.06574	0
d205	0	0	0.019564	-0.092817	-0.158283	0.197877	0.159191	-0.041302	0.875787	0.008724	-0.054445	0.059372	0.075349	0.088508	0.104544	0.02833	0.725427	0.917775	0.904401	0.952706	0.910374	1.03646	0.467262	0.534243	0.547969	15.1035	0.362953	0	0	0	0	0	0	0	6.84131	0	0.591781	0.286439	0	0.577105	0	0	0	1.8456	9.36913	0.76552	0.49424	-0.04924	0
d206	0	0	0.020724	-0.149189	-0.228313	0.757113	0.042294	-0.084522	0.970947	0.010835	-0.107294	0.145765	0.151561	0.138436	0.026781	-0.072861	0.807691	0.841914	0.907696	0.903461	0.998925	1.10245	0.550327	0.598247	0.664437	13.8906	0.163519	0	0	0	0	0	0	0	6.84335	0	0.593377	0.281644	0	0	0	0	0	3.68005	9.34964	0.77152	0.4921	-0.05016	0
d207	0	0	-0.031068	-0.090971	-0.221744	0.435145	-0.030402	-0.017626	0.92332	-0.018326	-0.098742	0.088803	0.09168	0.155737	-0.019325	0.011045	0.620116	0.874675	0.949189	0.848111	0.968903	1.05376	0.517189	0.558349	0.566958	17.1174	0.195072	0	0	0	0	0	0	0	6.62838	0	0.569602	0.295524	0	0	0	0	0	1.917	9.44134	0.76556	0.49952	-0.05318	0
d208	0	0	-0.178346	-0.020729	-0.179084	-0.037321	-0.061534	0.125922	0.897015	-0.100085	-0.078622	0.038783	0.085936	0.159781	-0.040314	0.00194	0.637205	0.902167	0.977736	0.865821	0.961848	1.02147	0.579894	0.589163	0.606842	16.9854	0	0	0	0	0	0	0	0	6.71786	0	0.574721	0	0	0	0	0	0	1.88789	9.47659	0.75846	0.49103	-0.04413	0
d209	0	0	-0.16429	-0.17676	0.064023	0.166279	0.027536	-0.055923	0.713144	-0.064792	0.020178	0.056452	0.070811	0.094777	0.019165	0.045555	0.714161	0.951393	0.967037	0.931474	0.982306	0.995487	0.550895	0.58483	0.565423	21.0099	0.188059	0	0	0	0	0	0	0	6.57927	0	0.562309	0.272503	0	0	0	0	0	1.88369	9.48529	0.75867	0.4801	-0.03792	0
d210	0	0	-0.150457	0.077596	-0.159055	0.036472	0.102894	0.045685	1.79502	-0.126056	-0.127271	0.059048	0.097815	0.081457	0.062094	0.133865	0.737753	0.861388	0.788118	1.00946	0.978356	0.926769	0.605173	0.691674	0.792748	5.25626	0.102132	0	0	0	0	0	0	0	7.54663	0	0.687041	0	0	0	0	0	0	1.72624	8.89825	0.81111	0.53	-0.08974	0
d211	0	0	-0.278026	-0.023407	-0.290597	0.547608	-0.232569	-0.158988	1.03	-0.08646	-0.063482	-0.147302	-0.104401	-0.080684	-0.154894	0.006817	0.645583	1.08992	1.04581	1.04982	1.11571	0.948294	0.471227	0.482738	0.498552	23.6887	0	0	0	0	0	0	0	0	6.71759	0	0.577133	0.423822	0	0	0	0	0	1.86517	9.43454	0.75791	0.49128	-0.04407	0
d212	0	0	-0.78013	0.551277	-0.429807	5.43874	-0.068866	-0.205978	2.74602	-0.210728	-0.104108	0.023818	0.075054	0.069634	-0.044601	0.125435	0.661529	0.96042	0.913102	0.935783	1.04089	1.06591	0.596869	0.597676	0.769044	8.34001	0	0	0	0	0	0	0	0	7.23597	5.88966	0.640958	0.300822	0	0	0	0	0	2.24904	9.93235	0.84843	0.55497	-0.11641	0
d213	0	0	-0.238382	0.059601	-0.142746	0.377099	-0.033834	0.025585	0.685749	-0.095651	-0.045796	0.077181	0.076263	0.140032	-0.021793	-0.108633	0.924818	0.933177	1.04032	0.943161	1.10308	1.13071	0.491979	0.519299	0.56651	18.7305	0.102621	0	0	0	0.493522	0	0	0	6.62903	0	0.568587	0.270703	0.493522	0	0	0	0.493522	1.89009	9.45364	0.77143	0.49412	-0.0527	0
d214	0	0	-0.138922	-0.004223	0.073356	0.222327	-0.225915	0.393443	1.4964	-0.114226	0.050792	0.006171	-0.002437	0.123256	-0.146944	-0.112706	0.532909	0.965408	1.10981	0.914949	1.081	1.06554	0.572811	0.5357	0.618421	7.36349	0.086825	0	0	0	0	0	0	0	7.28066	0	0.651573	0	0	0	0	0	0	1.77964	9.05513	0.78125	0.50263	-0.06041	0
d215	0	0	-0.236786	0.175448	-0.087362	1.78027	0.0427	-0.105577	1.02884	-0.097263	-0.027207	0.18823	0.170802	0.124889	0.027644	0.016472	1.10971	0.776046	0.809909	0.892897	0.99622	1.06348	0.555673	0.60893	0.752221	13.3116	0.063729	0	0	0	0	0	0	0	6.80208	0	0.582104	0.305408	0	0	0	0	0	1.84131	9.46509	0.7963	0.5127	-0.07059	0
d216	0	0	-0.119668	0.088162	-6.9e-05	0.73303	-0.051369	-0.038807	1.27408	-0.063544	-3.9e-05	0.029383	0.049662	0.02083	-0.031456	0.00523	0.845649	0.936029	0.886214	0.983736	1.02498	1.00301	0.479559	0.531401	0.537434	8.13255	0.260514	0	0	0	0	0	0	0	7.40981	0	0.662489	0.276139	0	0	0	0	0	1.71742	9.05463	0.79268	0.52444	-0.07931	0
d217	0	0	-0.200152	0.014313	-0.07946	0.340218	-0.119572	-0.056478	1.4964	-0.157765	-0.056571	0.014565	0.053306	0.129218	-0.077775	0.09159	0.721615	0.952422	0.953394	0.889656	1.02241	1.06083	0.567176	0.560875	0.5957	7.24888	0.005979	0	0	0	0.438663	0	0	0	7.37256	0	0.663738	0	0.438663	0	0	0	0.438663	1.76361	9.00097	0.78125	0.50263	-0.06041	0
d218	0	0	-0.13709	0.041743	0.216917	-0.264459	0.019772	0.020498	?	-0.083649	0.11055	0.009358	-0.010948	0.045616	0.033424	0	1.15609	1.10522	1.12563	1.0697	0.958593	1.17107	0	0	0	9.59132	0.658099	0	0	0	0	0	0	0	0	0	0	0	0	0	0	0	0	0	0	0.76429	0.59545	-0.15308	0
d219	0	0	-0.225199	-0.260552	0.216793	-0.559088	0.227254	-0.009811	1.25796	-0.107263	0.093266	0.051906	0.090822	0.107571	0.154369	-0.015048	0.718214	0.916795	0.890551	0.926872	0.857618	1.09431	0.633539	0.656402	0.495444	9.30434	0.223449	0	0	0	0	0	0	0	7.44045	0	0.663067	0.315572	0	0	0	0	0	1.69151	9.07892	0.80667	0.51333	-0.07298	0
d220	0	0	-0.139327	0.013723	-0.141981	0.043686	-0.232838	-0.173736	1.52708	-0.108957	-0.122135	-0.021915	0.047091	0.14901	-0.146574	-0.028271	0.744653	0.938941	0.997146	0.856947	1.08908	1.07159	0.536494	0.595784	0.647112	7.43144	0.475074	0	0	0	0	0	0	0	7.27628	0	0.651126	0	0	0	0	0	0	1.80651	9.06114	0.78952	0.52251	-0.07514	0
d221	0	0	-0.277309	0.399941	-0.516785	1.96357	0.191555	0.518987	1.79807	-0.124797	-0.181867	0.063882	0.004283	-0.004813	0.1276	0.250563	0.974168	0.942981	0.972385	0.975939	0.868017	1.25522	0.505942	0.513627	0.594456	4.38194	0.277559	0	0	0	0	0	0	0	7.01229	0	0.612714	0.396934	0	0	0	0	0	1.75289	9.26149	0.8181	0.53248	-0.08815	0
d222	0	0	-0.263386	0.037287	-0.312397	1.17242	0.084094	-0.020953	1.32681	-0.090281	-0.080573	0.05745	0.077676	0.133842	0.053869	-0.002506	0.615944	0.925347	0.916449	0.891505	0.932943	0.990577	0.451922	0.474263	0.48415	17.6773	0	0	0	0	0	0	0	0	6.80707	0	0.588805	0.290133	0	0.590859	0	0	0	1.85475	9.37099	0.78191	0.50823	-0.0639	0
d223	0	0	-0.239465	0.063846	0.043062	0.941845	0.021786	-0.210868	1.41757	-0.168663	0.038399	-0.009291	0.056574	0.033615	0.013433	-0.092041	0.734908	1.00578	0.799035	0.897499	0.929016	0.884361	0.510953	0.467728	0.517177	8.11425	0.073629	0	0	0	0.444482	0	0	0	7.17426	0	0.640025	0.340482	0.444482	0.567629	0	0	0.444482	1.84063	9.09343	0.79216	0.52018	-0.07549	0
d224	0	0	-0.163065	-0.039999	-0.058459	0.068298	-0.010734	0.098492	1.38874	-0.11498	-0.038914	-0.063347	0.00019	0.107428	-0.007063	0.044371	0.646461	1.00833	0.914255	0.91144	0.943957	1.07527	0.509254	0.534795	0.542453	7.15064	0.495795	0	0	0	1.08482	0	0	0	7.38838	0	0.666885	0.542407	0.542407	0	0	0	0.542407	1.75943	8.97825	0.77429	0.5	-0.05567	0
d225	0	0	-0.119033	-0.031158	-0.15494	0.180247	-0.153995	0.053908	1.41445	-0.09355	-0.109956	0.005972	0.041043	0.142989	-0.099054	-0.002132	0.531052	0.941168	0.991364	0.879615	1.02083	1.06221	0.55941	0.583495	0.615181	9.11237	0.0244	0	0	0	0	0	0	0	7.29986	0	0.654134	0	0	0	0	0	0	1.79114	9.04634	0.77963	0.50556	-0.06156	0
d226	0	0	-0.110053	0.048542	-0.094001	0.385537	-0.132633	0.279702	1.27489	-0.070527	-0.067235	0.073011	0.075231	0.16436	-0.08806	0.068762	0.552676	0.924033	0.966359	0.863639	1.04272	1.0802	0.44756	0.482879	0.465785	8.61487	0.49987	0	0	0	0	0	0	0	7.3708	0	0.663463	0.328546	0	0.618421	0	0	0	1.73748	8.9998	0.76842	0.50227	-0.05325	0
d227	0	0	-0.026961	-0.012064	0.425812	0.905382	-0.12774	-0.137784	0.955832	-0.011858	0.203857	0.050515	0.069058	0.075283	-0.087743	-0.156235	0.749658	0.958293	0.929915	0.920598	1.07078	0.955335	0.629845	0.520911	0.628195	13.1328	0.448107	0	0	0	0	0	0	0	7.05076	0	0.61008	0.350404	0	0	0	0	0	1.7917	9.35639	0.77251	0.49102	-0.04762	0
d228	0	0	0.170176	-0.774	-0.301095	-1.26004	-0.314773	0.07218	2.49213	0.066116	-0.108515	0.021799	-0.025645	0.073562	-0.18627	0.110254	0.640435	0.978774	1.01843	0.914711	1.11129	1.01331	0.969332	0.830055	0.655363	5.88967	0	0	0	0	1.70412	0	0	0	7.06513	0	0.631376	0	0.852061	0	0	0	0.852061	0	0	0.85969	0.57985	-0.1377	0
d229	0	0	-0.171557	0.022122	-0.149077	0.180247	-0.153995	0.053908	1.41445	-0.129706	-0.101775	0.005972	0.041043	0.142989	-0.099054	-0.002132	0.639834	0.941168	0.991364	0.879615	1.02083	1.06221	0.55941	0.583495	0.615181	8.94936	0.0244	0	0	0	0	0	0	0	7.29986	0	0.654134	0	0	0	0	0	0	1.79114	9.04634	0.77963	0.50556	-0.06156	0
d230	0	0	-0.192169	0.025308	-0.094057	-0.00777	-0.093907	0.050088	1.57595	-0.097464	-0.043342	-0.015491	0.001751	0.085001	-0.062368	-0.003721	0.725164	0.962901	1.00965	0.922404	0.991523	1.02628	0.59234	0.761399	0.777823	10.1174	0.074926	0	0	0	0	0	0	0	7.25617	0	0.644553	0	0	0	0	0	0	1.7685	9.11851	0.79362	0.51682	-0.07109	0
d231	0	0	0.180784	-0.845838	-0.315583	-0.712085	-0.266992	-0.023265	2.45732	0.064022	-0.11249	-0.013798	-0.034895	0.02663	-0.158473	0.073119	0.731925	1.04317	1.02741	0.941499	1.10973	1.06923	0.915645	0.775271	0.644298	5.19085	0.180429	0	0	0	2.35117	0	0	0	6.84924	0	0.604206	0.654236	0.654236	0	0	0	0.85183	0	0	0.85969	0.57985	-0.1377	0
d232	0	0	-0.345609	0.302631	0.326026	1.94011	0.045572	0.025639	0.754957	-0.112612	0.098887	0.097098	0.110398	0.113568	0.030797	-0.039926	1.14858	0.881028	0.845176	0.888575	0.959451	0.959125	0.637185	0.658646	0.736174	21.9937	0.508253	0	0	0	0	0	0	0	6.84198	0	0.592546	0.279205	0	0	0	0	0	1.88047	9.36456	0.78083	0.49626	-0.0534	0
d233	0	0	-1.40281	0.811675	-0.263121	8.19761	-0.106051	0.155735	2.52649	-0.432523	-0.066219	0.067817	0.053646	0.098244	-0.070906	-0.085678	0.879645	0.946081	0.957088	0.891331	1.07268	1.08881	0.816916	0.427881	0.623305	2.82236	0.059539	0	0	0	0.675659	0	0	0	1.26727	0.683692	0	0.273157	0.675659	0	0	0	0.675659	0	0	0.86098	0.56136	-0.12119	0
d234	0	0	-0.095346	0.141076	0.201837	0.186928	0.076852	0.008039	1.03075	-0.049506	0.080021	0.05416	0.07637	0.072436	0.049579	-0.004661	0.89829	0.852853	0.817137	0.983394	0.972245	0.980045	0.563641	0.626827	0.693304	13.5949	0.085815	0	0	0	0	0	0	0	6.95662	0	0.602638	0	0	0	0	0	0	1.84667	9.35533	0.76548	0.50051	-0.05314	0
d235	0	0	-0.175073	-0.05709	-0.232545	0.944475	-0.029707	-0.103549	1.10931	-0.119366	-0.1544	0.141576	0.140338	0.167049	-0.019539	-0.008498	0.660784	0.868111	0.854699	0.825495	0.974314	1.1034	0.548666	0.478047	0.533304	10.5074	0.165497	0	0	0	0	0	0	0	7.15637	0	0.635529	0.360207	0	0	0	0	0	1.81023	9.12866	0.76515	0.49308	-0.04882	0
d236	0	0	-0.237278	0.000746	-0.279974	0.637817	-0.107474	-0.200079	1.60501	-0.094658	-0.105964	-0.000576	0.017724	0.10925	-0.067014	-0.015471	0.62543	0.971104	1.02995	0.893057	1.01503	0.923861	0.501778	0.546238	0.569393	15.7687	0	0	0	0	0	0	0	0	7.0131	0	0.615297	0.281647	0	0	0	0	0	1.83679	9.24071	0.79312	0.52512	-0.07946	0
d237	0	0	-0.28224	-0.410011	-0.339793	0.890685	0.143309	0.01889	1.05883	-0.065076	-0.058502	0.121929	0.121773	0.116625	0.102326	0.039215	0.683245	0.881774	0.887946	0.927698	0.949679	1.01009	0.512431	0.528124	0.381382	21.8655	0	0	0	0	0	0	0	0	6.58667	0	0.550201	0.271457	0	0	0	0	0	1.77949	9.68029	0.78788	0.49694	-0.05614	0
d238	0	0	0.060304	-0.006555	-0.046367	-0.018427	0.042048	-0.100358	0.706989	0.034874	-0.01932	0.071827	0.082485	0.036561	0.02866	0.053125	0.62821	0.921536	0.88528	0.97875	0.991037	1.0181	0.479314	0.719926	0.633534	13.4507	0.152028	0	0	0	0	0	0	0	6.90771	0	0.604248	0.269595	0	0	0	0	0	3.58814	0	0.75556	0.48222	-0.03822	0
d239	0	0	-0.236443	0.013997	0.000945	0.850775	-0.043225	-0.116501	1.54089	-0.171332	0.000866	-0.08087	-0.042635	-0.036782	-0.028244	-0.029011	0.62206	1.08047	0.977736	0.989236	0.959119	0.940326	0.509076	0.445374	0.494772	5.14244	0.213015	0	0	0	0.449372	0	0	0	7.4107	0	0.674378	0.342762	0.449372	0.526342	0	0	0.449372	1.7531	8.90686	0.79286	0.50909	-0.06909	0
d240	0	0	-0.236443	0.013997	0.000945	0.850775	-0.043225	-0.116501	1.54089	-0.171332	0.000866	-0.08087	-0.042635	-0.036782	-0.028244	-0.029011	0.62206	1.08047	0.977736	0.989236	0.959119	0.940326	0.509076	0.445374	0.494772	5.14244	0.213015	0	0	0	0.449372	0	0	0	7.4107	0	0.674378	0.342762	0.449372	0.526342	0	0	0.449372	1.7531	8.90686	0.79286	0.50909	-0.06909	0
d241	0	0	0.065997	-0.403054	-0.158426	-0.393882	-0.299358	-0.096034	2.08567	0.048396	-0.176263	-0.157849	-0.127681	-0.093588	-0.182478	0.108738	0.656387	1.15472	1.14037	1.08405	1.10401	0.850188	0.931164	0.832503	0.615105	3.16298	0.012703	0	0	0	0.818279	0	0	0	7.3023	0	0.671076	0.347413	0.818279	0	0	0	0.818279	0	0	0.85797	0.56191	-0.12459	0
d242	0	0	-0.14643	-0.193281	-0.079581	0.206784	0.031005	0.009056	0.981218	-0.072751	-0.034018	0.037572	0.053657	0.104906	0.021162	0.065333	0.608026	0.934909	0.921934	0.916797	0.953607	1.02516	0.523069	0.533254	0.417589	13.3897	0.071162	0	0	0	0	0	0	0	7.28412	0	0.639914	0.265009	0	0	0	0	0	1.71539	9.21023	0.76731	0.48837	-0.04393	0
d243	0	0	-0.146491	-0.193465	-0.095456	0.072358	0.016255	-0.056486	1.02905	-0.074694	-0.041381	0.020346	0.041843	0.103082	0.011031	0.058622	0.601906	0.942747	0.926123	0.918582	0.957343	1.03263	0.536525	0.544625	0.423611	12.6096	0.06852	0	0	0	0	0	0	0	7.32522	0	0.645184	0.290038	0	0	0	0	0	1.70919	9.18622	0.77	0.49106	-0.04613	0
d244	0	0	-0.159317	-0.19291	-0.065633	0.237026	-0.015507	-0.114534	1.03097	-0.081302	-0.028826	0.069957	0.08522	0.133741	-0.010523	0.051027	0.670099	0.906331	0.89035	0.883101	0.97865	0.973954	0.55265	0.526045	0.423653	12.5317	0.064457	0	0	0	0	0	0	0	7.32149	0	0.64481	0.30921	0	0.633192	0	0	0	1.7082	9.18664	0.77	0.49106	-0.04613	0
d245	0	0	-0.194155	0.055708	-0.040999	0.495064	0.1381	0.047949	1.01604	-0.108021	-0.01926	0.132632	0.140979	0.096873	0.084625	-0.039557	0.763535	0.833312	0.896247	0.964515	0.954577	0.999438	0.542779	0.58735	0.64511	13.5463	0.055593	0	0	0	0	0	0	0	6.89445	0	0.597308	0.28878	0	0.563117	0	0	0	1.85892	9.35717	0.78025	0.51084	-0.06489	0
d246	0	0	-0.160305	0.01828	-0.197144	0.536998	-0.0718	0.039161	0.877596	-0.097497	-0.118963	0.052249	0.035315	0.095976	-0.046807	0.0526	0.81545	0.942455	1.03016	0.926015	1.01389	1.0335	0.49757	0.542562	0.494472	15.5671	0	0	0	0	0.758937	0	0	0	6.95086	0	0.603564	0.246891	0.379468	0	0	0	0.379468	1.79629	9.32779	0.75862	0.48732	-0.04411	0
d247	0	0	0.060362	-0.404293	-0.188285	-0.395587	-0.128879	0.014851	1.26189	0.036292	-0.088641	0.018244	0.001238	0.068502	-0.084774	0.094103	0.68928	0.950048	0.969828	0.922776	1.01234	1.05279	0.908131	0.797834	0.609912	9.08387	0.003907	0	0	0	0.848748	0	0	0	7.00503	0	0.623273	0	0.848748	0	0	0	0.848748	0	0	0.78074	0.50218	-0.05818	0
d248	0	0	0.111325	-0.420043	-0.137043	-0.428982	-0.082619	-0.059828	1.42344	0.076553	-0.086283	0.007489	-0.009073	0.057713	-0.053285	0.1208	0.5363	0.974982	0.99715	0.944629	0.994191	1.03821	0.926377	0.82471	0.646812	7.66537	0.024471	0	0	0	0.836992	0	0	0	7.14871	0	0.644892	0	0.836992	0	0	0	0.836992	0	0	0.79316	0.51136	-0.06824	0
d249	0	0	-0.178805	-0.023421	-0.054364	0.30842	-0.207132	0.255922	1.18539	-0.122283	-0.03625	-0.070562	-0.02794	0.042377	-0.139944	0.115306	0.700246	1.02576	1.01214	0.956712	1.08477	1.11829	0.546426	0.572676	0.60303	10.0124	0.01127	0	0	0	0	0	0	0	7.22099	0	0.640689	0	0	0	0	0	0	1.78551	9.13213	0.76047	0.48857	-0.04403	0
d250	0	0	-0.180148	0.032375	-0.135363	0.164867	-0.189749	-0.213945	1.4939	-0.141922	-0.099471	0.064293	0.110116	0.202058	-0.118331	-0.009307	0.699332	0.875982	0.969775	0.827086	1.06922	1.0506	0.56426	0.618985	0.641642	9.01086	0.004685	0	0	0	0	0	0	0	7.27458	0	0.651126	0	0	0	0	0	0	1.80354	9.05853	0.78952	0.51688	-0.07255	0
d251	0	0	-0.141565	0.048093	-0.04783	0.708903	-0.060187	-0.041446	?	-0.18504	-0.058323	0.190747	0.093093	0.208122	-0.129835	0	0.640812	0.549579	0.718454	0.600582	0.996968	0.997578	0	0	0	10.9868	0.104302	0	0	0	0	0	0	0	0	0	0	0	0	0	0	0	0	0	0	0.74038	0.5542	-0.10705	0
d252	0	0	-0.386151	0.029504	-0.053102	0.831824	-0.077965	-0.079738	2.00343	-0.171799	-0.020774	-0.027119	0.033961	0.110006	-0.049826	0.003364	0.670678	1.00224	0.909941	0.887821	0.990001	1.05888	0.564681	0.580036	0.623215	9.18181	0	0	0	0	0	0	0	0	7.3333	0	0.657386	0	0	0	0	0	0	1.74962	9.0356	0.80213	0.52264	-0.08129	0
d253	0	0	0.113857	-0.448516	-0.07699	-0.421573	-0.289754	-0.161614	1.29478	0.068027	-0.045471	-0.084052	-0.051032	-0.029446	-0.186594	0.011033	0.668641	1.04696	0.991646	0.993683	1.12949	0.935003	0.8397	0.698539	0.61715	9.09408	0.335276	0	0	0	0.837831	0	0	0	6.92779	0	0.614534	0.450648	0.837831	0	0	0	0.837831	0	0	0.78667	0.51683	-0.06807	0
d254	0	0	-0.190292	-0.056136	0.106663	0.288581	-0.020039	-0.001999	0.734818	-0.091074	0.039333	0.099452	0.108035	0.152487	-0.013324	-0.071577	0.744623	0.878182	0.95186	0.884761	0.999776	1.07642	0.507757	0.509897	0.566111	19.6024	0.589105	0	0	0	1.02176	0	0	0	6.2103	0	0.518527	0.284817	0.507349	0	0	0	0.514407	1.95474	9.71234	0.74955	0.4808	-0.03426	0
d255	0	0	-0.06241	0.03301	-0.185071	0.049134	0.040936	-0.164074	0.8685	-0.020684	-0.047779	0.092829	0.122213	0.143305	0.027319	-0.074676	0.526809	0.949026	1.06011	0.91538	1.02777	1.13325	0.56655	0.561001	0.608019	14.8189	0.585381	0	0	0	2.09671	0	0	0	6.05859	0	0.501971	0.407349	0.514617	0	0	0	0.545239	1.98249	9.78853	0.79798	0.50802	-0.06608	0
d256	0	0	-0.134174	-0.034186	-0.034993	0.702158	0.000741	-0.255845	1.41525	-0.095956	-0.025911	-0.023822	0.038171	0.053947	0.000472	-0.061176	0.604154	1.02399	0.926579	0.903587	0.938548	0.951555	0.570957	0.54866	0.58616	5.05247	0.033822	0	0	0	0	0	0	0	7.28299	0	0.652121	0	0	0	0	0	0	1.7727	9.04971	0.79375	0.50519	-0.06606	0
d257	0	0	-0.129212	0.03625	-0.105627	1.10637	0.205864	-0.051144	0.829614	-0.065799	-0.044848	0.140598	0.147754	0.085127	0.129935	-0.070114	0.863332	0.854942	0.915326	0.969095	0.92383	1.02948	0.490552	0.552967	0.616905	16.4632	0.361295	0	0	0	0.513754	0	0	0	6.15712	0	0.513313	0.269913	0.513754	0.583766	0	0	0.513754	1.98341	9.73072	0.77541	0.50423	-0.05985	0
d258	0	0	0.181221	-0.460284	-0.167729	-1.32139	-0.070124	-0.16269	1.23324	0.081546	-0.064692	0.02759	0.019488	0.047857	-0.044169	0.042527	0.76342	0.933088	0.942514	0.995476	1.04681	0.959636	0.911211	0.823389	0.645077	8.12486	0.262463	0	0	0	1.48729	0	0	0	7.01281	0	0.623664	0.34967	0.635282	0.108739	0	0	0.852005	0	0	0.81064	0.5243	-0.08079	0
d259	0	0	-0.096282	-0.09355	-0.162206	-0.246731	-0.262511	-0.106526	1.691	-0.106012	-0.308083	-0.257991	-0.229176	-0.171047	-0.189493	0.082843	0.757071	1.29821	1.29303	1.22116	1.10716	0.84048	0.673868	0.572773	0.41166	2.97498	0.060664	0	0	0	0	0	0	0	7.79391	0	0.75337	0.338259	0	0	0	0	0	0	0	0.82083	0.50325	-0.06992	0
d260	0	0	0.065997	-0.403054	-0.158426	-0.393882	-0.299358	-0.096034	2.08567	0.048396	-0.176263	-0.157849	-0.127681	-0.093588	-0.182478	0.108738	0.656387	1.15472	1.14037	1.08405	1.10401	0.850188	0.931164	0.832503	0.615105	3.16298	0.012703	0	0	0	0.818279	0	0	0	7.3023	0	0.671076	0.347413	0.818279	0	0	0	0.818279	0	0	0.85797	0.56191	-0.12459	0
d261	0	0	-0.253635	-0.13015	-0.080146	0.233677	0.052269	0.036045	1.49585	-0.167831	-0.046866	0.001224	0.024669	0.100859	0.03522	0.041583	0.779078	0.959682	0.934385	0.916763	0.912785	1.04818	0.63273	0.594939	0.42592	6.89024	0.000819	0	0	0	0	0	0	0	7.73379	0	0.705698	0	0	0	0	0	0	1.63458	8.86528	0.79394	0.50633	-0.06439	0
d262	0	0	-0.188529	-0.00658	-0.110589	0.394291	-0.074208	-0.03135	0.953133	-0.108427	-0.052038	-0.016897	-0.002511	0.036461	-0.049544	-0.005159	0.740274	0.995621	1.04846	0.98384	1.03322	1.07661	0.501388	0.52281	0.576679	13.0012	0.088255	0	0	0	0.51747	0	0	0	6.55532	0	0.558849	0.280806	0.51747	0	0	0	0.51747	1.90432	9.50983	0.75769	0.4845	-0.04005	0
d263	0	0	-0.217616	-0.28914	-0.010593	-0.306986	0.094558	-0.009551	1.12178	-0.094177	-0.004584	0.069619	0.086373	0.111566	0.067027	0.084666	0.78697	0.915087	0.906872	0.910833	0.936805	1.0533	0.611705	0.636834	0.472431	10.5967	0.085344	0	0	0	0	0	0	0	7.49996	0	0.66993	0.273937	0	0	0	0	0	1.67149	9.05585	0.80296	0.5039	-0.06437	0
d264	0	0	-0.200104	0.097307	-0.025009	0.434134	-0.077351	0.143785	1.18421	-0.137763	-0.013774	0.096714	0.1724	0.205098	-0.052091	0.119171	0.7211	0.813518	0.785692	0.76383	0.985673	1.14176	0.555993	0.587204	0.631958	9.98333	0.06676	0	0	0	0	0	0	0	7.21246	0	0.63723	0	0	0	0	0	0	3.54731	9.16949	0.76232	0.49333	-0.0473	0
d265	0	0	-0.113824	-0.168803	-0.086477	0.037025	0.021499	-0.103318	0.933616	-0.037995	-0.024575	0.078228	0.115422	0.112706	0.014782	0.016014	0.67478	0.931514	0.947956	0.920495	1.01289	1.00785	0.587662	0.664604	0.563783	19.7477	0.29871	0	0	0	0	0	0	0	4.91593	0	0.600778	0.273776	0	0	0	0	0	1.69088	9.34753	0.77523	0.49217	-0.04986	0
d266	0	0	-0.33705	0.291952	0.031103	1.95232	0.020375	-0.0124	0.764781	-0.110366	0.009397	0.095305	0.107497	0.109883	0.013976	-0.04089	1.0969	0.89148	0.884791	0.904835	0.984608	0.982861	0.63635	0.655383	0.730542	21.3214	0.384093	0	0	0	0	0	0	0	6.82975	0	0.590299	0.279382	0	0	0	0	0	1.86457	9.38001	0.78052	0.49372	-0.05178	0
d267	0	0	-0.165331	0.015155	-0.081106	0.330387	-0.178874	-0.180399	1.16301	-0.109582	-0.041026	-0.114444	-0.074774	-0.029349	-0.119969	0.092215	0.612914	1.06218	1.03347	1.01324	1.07689	0.981814	0.490769	0.491195	0.513357	10.0747	0.017521	0	0	0	0	0	0	0	7.05481	0	0.621236	0.395598	0	0	0	0	0	1.81446	9.20378	0.7619	0.4902	-0.04537	0
d268	0	0	-0.165331	0.015155	-0.081106	0.330387	-0.178874	-0.180399	1.16301	-0.109582	-0.041026	-0.114444	-0.074774	-0.029349	-0.119969	0.092215	0.612914	1.06218	1.03347	1.01324	1.07689	0.981814	0.490769	0.491195	0.513357	9.53225	0.017521	0	0	0	0	0	0	0	7.05481	0	0.621236	0.395598	0	0	0	0	0	1.81446	9.20378	0.7619	0.4902	-0.04537	0
d269	0	0	-0.029689	0.050443	0.355991	0.701303	-0.293712	-0.194739	0.97628	-0.012749	0.137129	-0.101748	-0.054844	-0.058739	-0.195818	-0.152652	0.823162	1.06508	0.991995	1.02381	1.17355	0.96416	0.585793	0.522469	0.604444	14.5832	0.016831	0	0	0	0	0	0	0	6.88373	0	0.589326	0.465396	0	0	0	0	0	1.85207	9.46332	0.7765	0.50615	-0.05645	0
d270	0	0	-0.269995	0.01605	-0.275297	0.778293	-0.09946	-0.195371	1.81241	-0.111013	-0.107589	0.009684	0.039298	0.121613	-0.062054	-0.013004	0.62421	0.96888	0.997863	0.883937	1.0154	0.962024	0.496146	0.529855	0.564124	12.3117	0	0	0	0	0	0	0	0	7.05625	0	0.620613	0.28217	0	0	0	0	0	1.81913	9.21525	0.80063	0.52874	-0.08452	0
d271	0	0	-0.277985	0.032402	-0.213024	1.75335	0.039827	-0.028523	1.11742	-0.094229	-0.05687	0.124727	0.123606	0.154053	0.026691	-0.012789	0.618888	0.893656	0.958943	0.882558	0.989154	1.00904	0.434194	0.454901	0.496441	21.0193	0	0	0	0	0.994034	0	0	0	6.44455	0	0.547335	0.251918	0.497017	0.439483	0	0	0.497017	1.90476	9.54659	0.77018	0.49315	-0.05241	0
d272	0	0	-0.269929	0.016277	-0.26343	0.978264	-0.067385	-0.089988	1.71922	-0.10786	-0.100478	0.039097	0.06124	0.128796	-0.042298	-0.006472	0.622897	0.950625	0.977168	0.878966	1.00151	0.951872	0.481332	0.516097	0.551293	13.0919	0	0	0	0	0	0	0	0	7.0248	0	0.616657	0.259602	0	0	0	0	0	1.82369	9.23324	0.79697	0.52404	-0.08025	0
d273	0	0	-0.141546	0.050929	-0.047596	0.826227	0.181535	-0.019336	0.922851	-0.074438	-0.02066	0.113043	0.124388	0.059362	0.113785	-0.031879	0.787503	0.865112	0.893499	0.991651	0.928349	0.977538	0.491035	0.548671	0.601139	13.8737	0.212775	0	0	0	0	0	0	0	6.80129	0	0.586795	0.27596	0	0.57044	0	0	0	1.87394	9.39751	0.77738	0.50724	-0.06178	0
d274	0	0	-0.121919	-0.00879	-0.19574	0.979809	0.099405	-0.080503	0.740476	-0.068476	-0.084686	0.080983	0.09732	0.105245	0.067812	-0.022516	0.667107	0.952413	1.02418	0.936174	0.961674	1.10977	0.455999	0.481305	0.52105	16.9483	0.677592	0	0	0	1.41211	0	0	0	5.6644	0	0.464322	0.263376	0.461198	0.602758	0	0	0.488714	2.04224	9.90013	0.75137	0.47763	-0.03659	0
d275	0	0	-0.179635	-0.193248	0.125691	0.103072	0.018542	-0.065305	0.719518	-0.078966	0.046868	0.001586	0.019433	0.061917	0.012579	-0.030661	0.847909	0.980268	0.96573	0.970766	0.983421	1.04947	0.485942	0.535623	0.516374	18.2509	0.007708	0	0	0	0	0	0	0	6.30507	0	0.520019	0.277168	0	0	0	0	0	1.88276	9.81588	0.74977	0.47741	-0.03177	0
d276	0	0	-0.155209	-0.099451	-0.057082	0.903806	0.041277	-0.125078	0.959436	-0.07961	-0.020099	0.072476	0.067473	0.064418	0.029575	0.03787	0.676558	0.943666	0.955351	0.980211	1.0191	1.06198	0.452093	0.456975	0.355298	11.5963	0.074063	0	0	0	0	0	0	0	7.11826	0	0.62317	0.26949	0	0	0	0	0	1.74444	9.24646	0.76739	0.48534	-0.04381	0
d277	0	0	0.006824	0.018522	-0.037423	0.313212	0.056691	-0.134958	0.350354	0.008528	-0.066807	0.027321	0.05483	-0.021785	0.033101	0.000956	1.00375	0.956938	0.894504	0.969685	0.943028	1.07251	0.634932	0.869487	1.13257	4.48248	0.012162	0	0	0	0	0	0	0	0	0	0	0.311869	0	0	0	0	0	0	0	0.78116	0.51699	-0.07096	0
d278	0	0	-0.234501	0.026074	-0.016779	0.820839	0.005636	-0.10593	1.3291	-0.156817	-0.009793	-0.000874	0.020532	0.025851	0.00373	0.009447	0.603869	0.994486	0.9187	0.951728	0.963537	1.0009	0.520718	0.445059	0.497902	6.91575	0.185131	0	0	0	1.08643	0	0	0	7.31528	0	0.659551	0.374591	0.477419	0.480808	0	0	0.60901	1.76826	8.98946	0.77647	0.49756	-0.05589	0
d279	0	0	-0.120101	-0.030236	-0.125586	0.058326	-0.108793	0.243813	1.50067	-0.087803	-0.088803	-0.041679	0.016533	0.138111	-0.071291	0.153767	0.624842	0.975905	0.952502	0.878787	0.994984	1.12614	0.516605	0.545519	0.557589	7.59576	0.50331	0	0	0	0	0	0	0	7.35626	0	0.660532	0	0	0	0	0	0	1.76922	9.02479	0.77879	0.50519	-0.06014	0
d280	0	0	-0.120101	-0.030236	-0.125586	0.058326	-0.108793	0.243813	1.50067	-0.087803	-0.088803	-0.041679	0.016533	0.138111	-0.071291	0.153767	0.624842	0.975905	0.952502	0.878787	0.994984	1.12614	0.516605	0.545519	0.557589	7.41305	0.50331	0	0	0	0	0	0	0	7.35626	0	0.660532	0	0	0	0	0	0	1.76922	9.02479	0.77879	0.50519	-0.06014	0
d281	0	0	0.040836	-0.410921	-0.256446	-0.348353	-0.211259	-0.348383	2.02088	0.025313	-0.204126	-0.10815	-0.057468	-0.070158	-0.123751	-0.013099	0.670927	1.08605	1.05768	1.03887	1.05457	0.864899	0.857362	0.868646	0.729297	4.46996	0.036725	0	0	0	0.832913	0	0	0	7.15845	0	0.64786	0.355139	0.832913	0	0	0	0.832913	2.3683	9.75738	0.83438	0.55522	-0.11609	0
d282	0	0	-0.103239	0.05442	-0.149014	0.252806	-0.050823	0.070186	1.25731	-0.074431	-0.102486	0.007672	0.043073	0.12831	-0.033078	0.061381	0.613761	0.951014	0.920078	0.875371	0.955854	1.03471	0.555259	0.577916	0.518122	11.4803	0.079129	0	0	0	0	0	0	0	7.31658	0	0.654449	0	0	0	0	0	0	1.75905	9.05834	0.77287	0.50539	-0.05838	0
d283	0	0	-0.143695	0.084309	-0.015873	0.730481	-0.014563	0.115179	0.986813	-0.088934	-0.008539	0.087869	0.087626	0.086648	-0.009335	0.024509	0.628243	0.902584	0.974045	0.931196	1.00637	1.03664	0.503632	0.529748	0.515737	13.5531	0.169458	0	0	0	0	0	0	0	7.19311	0	0.634494	0.259493	0	0	0	0	0	1.75565	9.18027	0.7679	0.49141	-0.04741	0
d284	0	0	-0.163013	-0.005742	-0.045657	0.070177	-0.330341	0.362276	1.29707	-0.1201	-0.031769	-0.081898	-0.058763	0.057551	-0.212121	0.080457	0.671796	1.00667	0.997644	0.930116	1.12344	1.09791	0.557216	0.578355	0.596743	10.1355	0.038856	0	0	0	0	0	0	0	7.22487	0	0.641981	0	0	0	0	0	0	1.7921	9.12047	0.77642	0.50561	-0.06048	0
d285	0	0	0.081787	-0.434697	-0.178068	-0.708776	-0.190646	0.124849	1.31632	0.044734	-0.095615	-0.048416	-0.046397	0.026621	-0.120985	0.09974	0.694255	1.0161	1.00818	0.967832	1.05398	1.02111	0.889527	0.788416	0.635962	9.01137	0.593268	0	0	0	0.848702	0	0	0	7.02638	0	0.625899	0	0.848702	0	0	0	0.848702	0	0	0.79167	0.51419	-0.06752	0
d286	0	0	-0.023096	-0.282173	0.054098	-0.480725	0.015844	-0.103704	0.743098	-0.009439	0.018922	0.08255	0.118009	0.11517	0.010718	0.009364	0.74362	0.923685	0.943457	0.906644	1.00246	0.996386	0.592996	0.731211	0.582807	20.1867	0.306684	0	0	0	0	0	0	0	4.79689	0	0	0.272815	0	0	0	0	0	1.87953	9.33544	0.76073	0.48582	-0.04338	0
d287	0	0	0.081787	-0.434697	-0.178068	-0.708776	-0.190646	0.124849	1.31632	0.044734	-0.095615	-0.048416	-0.046397	0.026621	-0.120985	0.09974	0.694255	1.0161	1.00818	0.967832	1.05398	1.02111	0.889527	0.788416	0.635962	9.01137	0.593268	0	0	0	0.848702	0	0	0	7.02638	0	0.625899	0	0.848702	0	0	0	0.848702	0	0	0.79167	0.51419	-0.06752	0
d288	0	0	-0.146638	-0.004733	-0.131344	0.269475	-0.187047	-0.172703	0.892841	-0.085863	-0.060061	-0.119938	-0.083464	-0.049969	-0.127789	0.008143	0.695603	1.05824	1.0346	1.01372	1.07976	0.991422	0.506118	0.524851	0.550851	15.0808	0.234554	0	0	0	0	0	0	0	6.95739	0	0.607805	0.408037	0	0	0	0	0	1.84042	9.27947	0.74699	0.483	-0.03512	0
d289	0	0	-0.146638	-0.004733	-0.131344	0.269475	-0.187047	-0.172703	0.892841	-0.085863	-0.060061	-0.119938	-0.083464	-0.049969	-0.127789	0.008143	0.695603	1.05824	1.0346	1.01372	1.07976	0.991422	0.506118	0.524851	0.550851	14.5384	0.234554	0	0	0	0	0	0	0	6.95739	0	0.607805	0.408037	0	0	0	0	0	1.84042	9.27947	0.74699	0.483	-0.03512	0
d290	0	0	-0.365453	-0.039068	-0.112228	1.26529	-0.051882	-0.035591	1.01961	-0.114499	-0.026234	0.02447	0.043811	0.077714	-0.035217	0.062993	0.640544	0.967482	0.950284	0.927884	1.00614	1.00895	0.475888	0.483197	0.49533	23.6802	0	0	0	0	0.939381	0	0	0	6.81226	0	0.587681	0.272022	0.469691	0	0	0	0.469691	1.83293	9.39156	0.75591	0.48355	-0.03992	0
d291	0	0	-0.086588	0.120622	-0.166438	0.308259	-0.204584	0.030931	1.39397	-0.044032	-0.06902	0.032789	0.058155	0.124822	-0.131963	0.008661	0.794181	0.909954	1.01438	0.899635	1.08664	1.0976	0.641048	0.586153	0.643434	9.22135	0.094592	0	0	0	0	0	0	0	7.22918	0	0.638925	0.741191	0	0	0	0	0	1.79638	9.16789	0.81	0.52667	-0.08121	0
d292	0	0	-0.125506	0.015682	-0.150901	0.28109	-0.129749	-0.145713	1.02298	-0.078408	-0.070364	-0.122772	-0.082834	-0.056283	-0.086877	0.008691	0.622634	1.05516	1.03167	1.03487	1.04796	0.943217	0.492382	0.511889	0.526875	12.4139	0.061469	0	0	0	0	0	0	0	7.02502	0	0.617173	0.400558	0	0	0	0	0	1.83187	9.22777	0.75621	0.48916	-0.0424	0
d293	0	0	-0.082578	-0.003105	-0.167054	1.2286	0.062882	-0.13912	0.558297	-0.040745	-0.070063	0.129997	0.140427	0.148991	0.042336	-0.065518	0.723768	0.911186	1.03609	0.908471	1.01924	1.05837	0.490323	0.548726	0.613006	26.5938	0.467528	0	0	0	2.75262	0	0	0	5.52185	0	0.448868	0.261701	0.447981	0	0	0	0.489024	2.06901	9.98605	0.7447	0.4747	-0.03277	0
d294	0	0	-0.11895	-0.003718	-0.1666	0.842772	0.008364	-0.144811	0.830611	-0.071149	-0.088226	0.083877	0.100018	0.117012	0.005599	-0.07973	0.686413	0.945852	1.05761	0.929795	1.03142	1.07807	0.4643	0.510272	0.574303	15.0399	0.629287	0	0	0	1.41211	0	0	0	6.07669	0	0.50788	0.263376	0.461198	0	0	0	0.488714	1.99533	9.7092	0.75697	0.48346	-0.04152	0
d295	0	0	-0.141835	-0.016513	-0.195432	0.577021	0.011327	-0.123128	0.96787	-0.090307	-0.107997	0.100943	0.116159	0.1687	0.007577	-0.082634	0.674311	0.909445	1.01045	0.879124	1.01213	1.11907	0.461167	0.505228	0.565846	11.4934	0.594197	0	0	0	1.95952	0	0	0	6.32483	0	0.535284	0.266351	0.471525	0	0	0	0.504052	1.95887	9.58631	0.76099	0.48841	-0.04489	0
d296	0	0	-0.141835	-0.016513	-0.195432	0.577021	0.011327	-0.123128	0.96787	-0.090307	-0.107997	0.100943	0.116159	0.1687	0.007577	-0.082634	0.674311	0.909445	1.01045	0.879124	1.01213	1.11907	0.461167	0.505228	0.565846	11.4934	0.594197	0	0	0	1.95952	0	0	0	6.32483	0	0.535284	0.266351	0.471525	0	0	0	0.504052	1.95887	9.58631	0.76099	0.48841	-0.04489	0
d297	0	0	-0.063223	0.219418	-0.16813	0.137989	-0.163992	-0.019876	1.31921	-0.022623	-0.058026	-0.14732	-0.079602	0.019399	-0.10956	-0.06021	0.688835	1.10633	1.12715	0.999791	1.07803	1.01995	0.666863	0.615746	0.50331	8.59327	0.176566	0	0	0	0	0	0	0	7.39312	0	0.661984	0.726976	0	0	0	0	0	1.72523	9.04291	0.82593	0.53432	-0.08798	0
d298	0	0	-0.181318	0.202382	-0.150282	0.400163	-0.138402	0.055064	1.45985	-0.146119	-0.109843	0.029353	0.083916	0.15214	-0.082199	0.058303	0.408089	0.924023	0.906234	0.840884	0.977745	1.01172	0.697133	0.643118	0.751734	7.73274	0.026924	0	0	0	0	0	0	0	-0.902764	0	0	0	0	0	0	0	0	1.90494	9.10795	0.78056	0.51358	-0.06958	0
d299	0	0	0.021727	-0.179922	-0.040358	-0.051279	0.083284	-0.050175	0.896088	0.007023	-0.011478	0.103013	0.150753	0.144408	0.05714	0.00318	0.910857	0.898813	0.903463	0.888545	0.953454	0.999774	0.572278	0.636708	0.617162	16.2445	0.168896	0	0	0	0	0	0	0	6.37026	0	0.531346	0.266382	0	0	0	0	0	1.92283	9.71555	0.79271	0.50214	-0.05991	0
d300	0	0	-0.175491	-0.063956	-0.010619	-0.169827	-0.184425	0.263622	1.17607	-0.112842	-0.005869	-0.06206	-0.04348	0.118535	-0.118866	0.136917	0.682953	0.960615	0.82415	0.891803	1.01475	1.11133	0.534841	0.545101	0.579025	11.3277	0.615915	0	0	0	0	0	0	0	7.20515	0	0.63805	0	0	0	0	0	0	1.79289	9.15055	0.76127	0.49769	-0.05135	0
d301	0	0	0.10125	-0.479295	-0.182779	-0.651184	-0.260675	0.028507	1.23836	0.052325	-0.094459	-7.7e-05	0.001968	0.085384	-0.166157	0.088681	0.589239	0.977708	0.952324	0.909882	1.09621	0.996681	0.79923	0.710227	0.573178	8.67947	0.580997	0	0	0	1.79238	0	0	0	6.98679	0	0.621684	0.408357	0.473803	0	0	0	0.844775	0	0	0.79167	0.51419	-0.06752	0
d302	0	0	-0.377028	-0.037446	-0.113312	1.26948	-0.019083	-0.065621	1.02214	-0.118214	-0.022715	0.026361	0.04489	0.078986	-0.012953	0.061919	0.602671	0.96551	0.945243	0.924009	0.98134	1.03588	0.478173	0.473046	0.466009	23.392	0	0	0	0	0.939381	0	0	0	6.79513	0	0.585723	0.295656	0.469691	0.568129	0	0	0.469691	1.83378	9.39912	0.75591	0.48355	-0.03992	0
d303	0	0	-0.092228	0.067488	-0.031497	0.32384	0.047729	-0.149641	0.96377	-0.047537	-0.013131	-0.008129	0.012484	-0.000685	0.031313	0.031128	0.927725	0.93365	0.939577	1.05235	1.00078	0.947242	0.548974	0.630778	0.658349	13.6951	0.104027	0	0	0	0.922498	0	0	0	6.86648	0	0.589114	0.370037	0.461249	0	0	0	0.461249	1.8304	9.44001	0.75965	0.49124	-0.04602	0
d304	0	0	-0.136509	-0.09573	-0.198931	0.424904	0.067077	-0.107848	0.987442	-0.07398	-0.093052	0.074391	0.093105	0.129394	0.044934	-0.078768	0.669987	0.935998	1.03093	0.91237	0.970737	1.10265	0.490776	0.524413	0.54226	12.1666	0.557119	0	0	0	0.988098	0	0	0	6.32075	0	0.533486	0.273595	0.48678	0	0	0	0.501319	1.95334	9.61026	0.77267	0.49372	-0.05086	0
d305	0	0	-0.215368	0.088893	-0.070833	0.478742	-0.073479	-0.049593	1.17076	-0.134587	-0.034382	0.015178	0.044969	0.111885	-0.047774	0.078663	0.662046	0.934661	0.930315	0.916025	1.03455	1.08601	0.513595	0.519741	0.570017	10.5341	0.014704	0	0	0	0	0	0	0	7.12635	0	0.628683	0.335159	0	0	0	0	0	1.80716	9.18636	0.77143	0.49604	-0.05121	0
d306	0	0	-0.14122	-0.022752	-0.169237	0.584326	-0.075245	-0.193766	1.00057	-0.091785	-0.103413	0.041814	0.070112	0.111199	-0.05049	-0.094836	0.644007	0.986085	1.07716	0.942179	1.07796	1.0674	0.452036	0.504492	0.558002	10.5242	0.578763	0	0	0	1.8481	0	0	0	6.37968	0	0.542745	0.260785	0.449436	0	0	0	0.484659	1.95266	9.53735	0.76667	0.49111	-0.04896	0
d307	0	0	-0.14122	-0.022752	-0.169237	0.584326	-0.075245	-0.193766	1.00057	-0.091785	-0.103413	0.041814	0.070112	0.111199	-0.05049	-0.094836	0.644007	0.986085	1.07716	0.942179	1.07796	1.0674	0.452036	0.504492	0.558002	10.5242	0.578763	0	0	0	1.8481	0	0	0	6.37968	0	0.542745	0.260785	0.449436	0	0	0	0.484659	1.95266	9.53735	0.76667	0.49111	-0.04896	0
d308	0	0	-0.142022	-0.10788	-0.060456	0.412893	-0.063907	-0.071625	1.20795	-0.079962	-0.02603	-0.049134	-0.041671	-0.021749	-0.044432	0.076501	0.703824	1.03704	1.0432	1.0613	1.06403	1.03456	0.474337	0.478349	0.358035	8.47555	0.164845	0	0	0	0	0	0	0	7.35027	0	0.652965	0.274694	0	0	0	0	0	1.70816	9.11037	0.78158	0.49891	-0.05552	0
d309	0	0	-0.221247	0.010025	-0.134628	0.795079	-0.009632	-0.153816	1.39492	-0.156527	-0.116133	-0.054195	-0.007587	-0.006813	-0.006133	-0.056812	0.64366	1.05466	0.961305	0.965836	0.944941	0.936446	0.517792	0.469331	0.510299	6.87094	0.210623	0	0	0	0.445964	0	0	0	7.30286	0	0.657964	0.341358	0.445964	0.553907	0	0	0.445964	1.78837	8.99889	0.78687	0.50866	-0.06672	0
d310	0	0	0.151887	-0.445796	-0.202765	-0.812972	-0.164908	-0.090294	1.64928	0.078656	-0.099088	0.022165	0.007749	0.052766	-0.104628	0.017778	0.743367	0.958861	0.966088	0.949886	1.07706	0.960239	0.902922	0.774469	0.589274	4.42557	0.211578	0	0	0	1.44689	0	0	0	7.08517	0	0.636848	0.338256	0.610577	0.117854	0	0	0.836316	0	0	0.8375	0.54571	-0.10349	0
d311	0	0	-0.037072	0.203254	-0.172751	0.0645	-0.163546	-0.051427	1.23432	-0.013044	-0.058485	-0.139532	-0.068638	0.022095	-0.107885	-0.044422	0.694879	1.09216	1.11926	0.98945	1.0654	0.986613	0.666762	0.624216	0.507831	10.3702	0.093124	0	0	0	0	0	0	0	7.34154	0	0.65575	0.72638	0	0	0	0	0	1.74032	9.06725	0.81867	0.53155	-0.08449	0
d312	0	0	-0.119033	-0.031158	-0.15494	0.180247	-0.153995	0.053908	1.41445	-0.09355	-0.109956	0.005972	0.041043	0.142989	-0.099054	-0.002132	0.531052	0.941168	0.991364	0.879615	1.02083	1.06221	0.55941	0.583495	0.615181	9.11237	0.0244	0	0	0	0	0	0	0	7.29986	0	0.654134	0	0	0	0	0	0	1.79114	9.04634	0.77963	0.50556	-0.06156	0
d313	0	0	-0.135021	-0.0029	0.027068	0.351781	-0.079376	-0.078641	1.36398	-0.098235	0.018005	0.058653	0.120147	0.18213	-0.050659	-0.034256	0.710629	0.897211	0.768645	0.818358	0.967977	1.03154	0.556749	0.592722	0.642284	9.92826	0.193899	0	0	0	0	0	0	0	7.18532	0	0.638723	0	0	0	0	0	0	1.83873	9.12435	0.78034	0.51049	-0.06469	0
d314	0	0	-0.1758	-0.138018	-0.191022	0.881531	0.026235	-0.022167	0.738874	-0.090454	-0.089472	0.115184	0.123511	0.143969	0.017509	0.00542	0.724165	0.880727	0.870432	0.861337	0.95468	1.03756	0.526395	0.515464	0.54084	18.2795	0.17206	0	0	0	0	0	0	0	6.96103	0	0.610016	0.234847	0	0	0	0	0	1.84549	9.25299	0.75196	0.47973	-0.03657	0
d315	0	0	0.104675	-0.606152	0.046316	-1.67423	-0.121228	0.276538	0.869858	0.044983	0.016364	-0.019203	0.01516	0.122637	-0.078287	0.075388	0.694582	0.936732	0.911835	0.887649	0.976186	1.12855	0.839343	0.740127	0.632583	18.022	0.128282	0	0	0	0.853539	0	0	0	6.74643	0	0.587941	0	0.853539	0	0	0	0.853539	0	0	0.768	0.49943	-0.04868	0
d316	0	0	-0.18066	0.02203	0.12246	0.626834	-0.257014	-0.18494	0.813165	-0.093877	0.053453	-0.040773	0.006149	-0.005603	-0.175783	-0.14526	0.92035	1.03056	1.09727	1.00845	1.18527	1.00106	0.484939	0.495951	0.571928	15.9558	0.046212	0	0	0	2.37585	0	0	0	5.94174	0	0.488231	0.442286	0.588855	0.35349	0	0	0.601902	2.02318	9.87316	0.74343	0.48523	-0.03351	0
d317	0	0	-0.354057	0.077273	-0.222214	0.59766	-0.071447	-0.048663	2.03224	-0.156811	-0.079572	0.051725	0.150958	0.211126	-0.044933	0.03533	0.583209	0.905105	0.928889	0.805468	0.979	1.03866	0.559835	0.571313	0.597059	10.4867	0.075555	0	0	0	0	0	0	0	6.98288	0	0.607687	0	0	0	0	0	0	1.80272	9.30563	0.80556	0.53111	-0.08783	0
d318	0	0	-0.144198	0.00399	-0.212187	0.077811	-0.108301	0.161551	1.33058	-0.098558	-0.124991	-0.056207	0.018511	0.068358	-0.069072	0.128388	0.591909	0.991715	0.959346	0.957167	1.02779	1.01288	0.552725	0.56498	0.580051	8.08914	0.004954	0	0	0	0	0	0	0	7.29928	0	0.652136	0	0	0	0	0	0	1.77619	9.06965	0.78108	0.50227	-0.05858	0
d319	0	0	-0.137098	-0.002439	-0.200155	0.686598	0.068461	-0.110933	0.98223	-0.08692	-0.109191	0.107354	0.114035	0.15288	0.045644	-0.092272	0.694635	0.899032	1.00928	0.884574	0.96603	1.10483	0.469986	0.498729	0.559952	12.1579	0.620369	0	0	0	0.979536	0	0	0	6.33636	0	0.535753	0.270825	0.481678	0	0	0	0.497858	1.95383	9.59402	0.75972	0.48701	-0.04372	0
d320	0	0	-0.106938	0.018985	-0.008912	0.682204	-0.100389	-0.209344	0.911163	-0.066085	-0.005106	0.06944	0.084641	0.114922	-0.064966	-0.080772	0.667125	0.935742	1.0293	0.907962	1.0607	0.995015	0.479297	0.529174	0.5698	14.5909	0.379244	0	0	0	0.932413	0	0	0	6.57174	0	0.563725	0.262611	0.45779	0	0	0	0.474623	1.9214	9.45771	0.76296	0.49231	-0.04831	0
d321	0	0	-0.106938	0.018985	-0.008912	0.682204	-0.100389	-0.209344	0.911163	-0.066085	-0.005106	0.06944	0.084641	0.114922	-0.064966	-0.080772	0.667125	0.935742	1.0293	0.907962	1.0607	0.995015	0.479297	0.529174	0.5698	14.5909	0.379244	0	0	0	0.932413	0	0	0	6.57174	0	0.563725	0.262611	0.45779	0	0	0	0.474623	1.9214	9.45771	0.76296	0.49231	-0.04831	0
d322	0	0	-0.111682	0.026939	0.01686	1.00044	-0.000487	-0.167238	0.708324	-0.062271	0.008166	0.116477	0.127707	0.141866	-0.000327	-0.068923	0.683611	0.918689	1.03915	0.90989	1.05027	1.03017	0.474665	0.511735	0.580536	18.8365	0.633233	0	0	0	1.84851	0	0	0	6.08075	0	0.508217	0.262479	0.453331	0	0	0	0.474623	1.98838	9.70939	0.75152	0.47952	-0.03758	0
d323	0	0	-0.111682	0.026939	0.01686	1.00044	-0.000487	-0.167238	0.708324	-0.062271	0.008166	0.116477	0.127707	0.141866	-0.000327	-0.068923	0.683611	0.918689	1.03915	0.90989	1.05027	1.03017	0.474665	0.511735	0.580536	18.8365	0.633233	0	0	0	1.84851	0	0	0	6.08075	0	0.508217	0.262479	0.453331	0	0	0	0.474623	1.98838	9.70939	0.75152	0.47952	-0.03758	0
d324	0	0	-0.111682	0.026939	0.01686	1.00044	-0.000487	-0.167238	0.708324	-0.062271	0.008166	0.116477	0.127707	0.141866	-0.000327	-0.068923	0.683611	0.918689	1.03915	0.90989	1.05027	1.03017	0.474665	0.511735	0.580536	18.8365	0.633233	0	0	0	1.84851	0	0	0	6.08075	0	0.508217	0.262479	0.453331	0	0	0	0.474623	1.98838	9.70939	0.75152	0.47952	-0.03758	0
d325	0	0	-0.215368	0.088893	-0.070833	0.478742	-0.073479	-0.049593	1.17076	-0.134587	-0.034382	0.015178	0.044969	0.111885	-0.047774	0.078663	0.662046	0.934661	0.930315	0.916025	1.03455	1.08601	0.513595	0.519741	0.570017	10.5341	0.014704	0	0	0	0	0	0	0	7.12635	0	0.628683	0.335159	0	0	0	0	0	1.80716	9.18636	0.77143	0.49604	-0.05121	0
d326	0	0	-0.127575	-0.063306	-0.037669	0.0352	-0.275861	-0.023128	0.798436	-0.066161	-0.015183	-0.17452	-0.134993	-0.110385	-0.184863	0.000495	0.70726	1.11971	1.07965	1.08528	1.14517	0.969839	0.474587	0.511846	0.547568	16.6475	0.082495	0	0	0	0	0	0	0	6.84541	0	0.593762	0.389639	0	0	0	0	0	1.85586	9.34647	0.74876	0.48333	-0.03527	0
d327	0	0	-0.251593	0.263576	-0.082229	0.620353	-0.065228	0.005053	1.70077	-0.134997	-0.039959	-0.018285	-0.040173	0.06658	-0.043658	0.011573	0.747281	0.980064	1.0932	0.953377	0.989457	0.998817	0.603604	0.743551	0.736269	7.85782	0.009125	0	0	0	0	0	0	0	7.4441	0	0.669328	0	0	0	0	0	0	1.69646	9.00134	0.79841	0.51581	-0.07098	0
d328	0	0	-0.251593	0.263576	-0.082229	0.620353	-0.065228	0.005053	1.70077	-0.134997	-0.039959	-0.018285	-0.040173	0.06658	-0.043658	0.011573	0.747281	0.980064	1.0932	0.953377	0.989457	0.998817	0.603604	0.743551	0.736269	7.85782	0.009125	0	0	0	0	0	0	0	7.4441	0	0.669328	0	0	0	0	0	0	1.69646	9.00134	0.79841	0.51581	-0.07098	0
d329	0	0	0.050924	-0.512719	0.162771	-0.251242	-0.08742	-0.0312	1.26316	0.021448	0.056756	0.068568	0.086094	0.145132	-0.059892	-0.045815	0.721256	0.899278	0.888124	0.875461	1.02233	1.02716	0.70591	0.816402	0.549263	11.8225	0	0	0	0	1.59983	0	0	0	6.47574	0	0.546985	0.411547	0.602546	0.407962	0	0	0.997286	0	0	0.77485	0.50199	-0.051	0
d330	0	0	-0.139981	0.052447	-0.064636	0.940952	0.005209	-0.127912	0.925116	-0.08303	-0.026319	0.078668	0.084531	0.08299	0.003624	0.04927	0.658912	0.93426	0.928173	0.954252	1.03306	1.04898	0.423493	0.445172	0.476679	11.5963	0.074063	0	0	0	0	0	0	0	6.80079	0	0.591277	0.262696	0	0	0	0	0	1.85851	9.32568	0.75652	0.48103	-0.0395	0
d331	0	0	0.154555	-0.452078	-0.196054	-0.493599	-0.303675	0.135427	2.19992	0.076048	-0.109008	0.036301	0.000279	0.075293	-0.186959	0.008389	0.790847	0.966062	0.97138	0.917285	1.12441	0.971694	0.970532	0.724496	0.694916	2.99127	0.255481	0	0	0	1.44689	0	0	0	7.17837	0	0.337659	0.610577	0.610577	-0.451544	0	0	0.836316	0	0	0.85172	0.5623	-0.11909	0
d332	0	0	0.170857	-0.440914	-0.160939	-0.592359	-0.002327	-0.060681	1.05743	0.071384	-0.060813	0.053952	0.032727	0.035914	-0.001516	0.048267	0.859251	0.923436	0.935824	0.993422	1.00245	0.942729	0.846534	0.769947	0.63778	10.4655	0.187841	0	0	0	1.48729	0	0	0	6.94501	0	0.615013	0.245776	0.635282	0.10887	0	0	0.852005	0	0	0.79811	0.5112	-0.06892	0
d333	0	0	-0.275631	0.07536	-0.199034	1.57381	-0.048682	-0.200289	1.54898	-0.108447	-0.059142	0.029968	0.046994	0.076863	-0.031638	0.015427	0.52872	0.96531	0.961887	0.902647	0.98392	0.926148	0.4508	0.467194	0.481569	13.1081	0	0	0	0	0	0	0	0	6.87326	0	0.599069	0.276795	0	0	0	0	0	1.84472	9.30073	0.78362	0.51136	-0.06833	0
d334	0	0	-0.187278	0.02864	-0.102846	0.243415	-0.141463	0.139169	1.56093	-0.14651	-0.072276	0.014882	0.058704	0.153033	-0.091656	0.132075	0.637466	0.93504	0.946858	0.871171	1.02435	1.10078	0.559674	0.573777	0.614343	7.22086	0.043651	0	0	0	0	0	0	0	7.39858	0	0.667198	0	0	0	0	0	0	1.76018	8.98583	0.78387	0.50548	-0.06295	0
d335	0	0	-0.171557	0.022122	-0.149077	0.180247	-0.153995	0.053908	1.41445	-0.129706	-0.101775	0.005972	0.041043	0.142989	-0.099054	-0.002132	0.639834	0.941168	0.991364	0.879615	1.02083	1.06221	0.55941	0.583495	0.615181	7.86454	0.0244	0	0	0	0	0	0	0	7.29986	0	0.654134	0	0	0	0	0	0	1.79114	9.04634	0.77963	0.50556	-0.06156	0
d336	1	0	-0.1942	-0.061006	-0.012078	1.6577	0.054439	-0.082939	0.609057	-0.07895	-0.004206	0.082439	0.112014	0.119946	0.038054	0.006003	0.723693	0.923001	0.944803	0.91774	0.995439	1.03326	0.631753	0.800507	0.515228	20.8391	0.305002	0	1	0	0	0	0	0.390632	6.23386	0.203511	0.520978	0.270788	0	0	0	0.390632	0	0	0	0.77265	0.48906	-0.0462	0
d337	0	0	-0.175395	0.023776	-0.139057	0.188939	-0.1623	0.083475	1.38542	-0.128644	-0.089587	0.018418	0.054186	0.151547	-0.104018	0.008625	0.611769	0.935864	0.973332	0.87809	1.03328	1.06586	0.539507	0.568629	0.602594	8.70394	0.0244	0	0	0	0.999695	0	0	0	7.28373	0	0.652498	0.46877	0.46877	0	0	0	0.530926	1.79483	9.04961	0.77963	0.50556	-0.06156	0
d338	0	0	-0.131073	-0.003904	-0.167546	0.6963	-0.031883	-0.147926	1.01765	-0.084929	-0.099203	0.04741	0.066896	0.09338	-0.021256	-0.095353	0.675922	0.973285	1.07411	0.945656	1.04057	1.09331	0.460781	0.50209	0.566827	11.1887	0.625216	0	0	0	0.960723	0	0	0	6.39126	0	0.543214	0.265259	0.470094	0	0	0	0.490629	1.94761	9.54506	0.76515	0.48951	-0.04757	0
d339	0	0	-0.155803	0.046897	-0.02596	0.097976	-0.094149	-0.072029	1.39277	-0.098381	-0.015906	-0.009518	0.056953	0.076477	-0.056988	0.073878	0.709268	0.929014	0.876561	0.911932	1.02106	1.05539	0.530298	0.575021	0.632533	7.85555	0.285073	0	0	0	0	0	0	0	7.25962	0	0.643014	0	0	0	0	0	0	1.78985	9.14776	0.79167	0.52868	-0.08053	0
d340	0	0	-0.173645	-0.037669	-0.185135	0.992682	-0.010421	-0.084785	0.762805	-0.078804	-0.068265	0.067036	0.054752	0.073578	-0.006806	-0.011965	0.79945	0.915106	0.890886	0.908947	0.97969	0.998479	0.4525	0.560914	0.587695	23.0397	0.208825	0	0	0	0.770395	0	0	0	6.72869	0	0.579242	0.251207	0.385197	0	0	0	0.385197	2.67092	10.9012	0.74981	0.48635	-0.04074	0
d341	0	0	-0.173645	-0.037669	-0.185135	0.992682	-0.010421	-0.084785	0.762805	-0.078804	-0.068265	0.067036	0.054752	0.073578	-0.006806	-0.011965	0.79945	0.915106	0.890886	0.908947	0.97969	0.998479	0.4525	0.560914	0.587695	23.0397	0.208825	0	0	0	0.770395	0	0	0	6.72869	0	0.579242	0.251207	0.385197	0	0	0	0.385197	2.67092	10.9012	0.74981	0.48635	-0.04074	0
d342	0	0	-0.173645	-0.037669	-0.185135	0.992682	-0.010421	-0.084785	0.762805	-0.078804	-0.068265	0.067036	0.054752	0.073578	-0.006806	-0.011965	0.79945	0.915106	0.890886	0.908947	0.97969	0.998479	0.4525	0.560914	0.587695	23.0397	0.208825	0	0	0	0.770395	0	0	0	6.72869	0	0.579242	0.251207	0.385197	0	0	0	0.385197	2.67092	10.9012	0.74981	0.48635	-0.04074	0
d343	0	0	-0.173645	-0.037669	-0.185135	0.992682	-0.010421	-0.084785	0.762805	-0.078804	-0.068265	0.067036	0.054752	0.073578	-0.006806	-0.011965	0.79945	0.915106	0.890886	0.908947	0.97969	0.998479	0.4525	0.560914	0.587695	23.0397	0.208825	0	0	0	0.770395	0	0	0	6.72869	0	0.579242	0.251207	0.385197	0	0	0	0.385197	2.67092	10.9012	0.74981	0.48635	-0.04074	0
d344	0	0	-0.108716	0.003311	-0.123163	0.682204	-0.063734	-0.184289	0.911163	-0.067181	-0.070568	0.06944	0.084641	0.114922	-0.041245	-0.038096	0.627374	0.935742	1.0293	0.907962	1.03721	1.02725	0.478798	0.527928	0.56919	14.5909	0.692648	0	0	0	0.913616	0	0	0	6.68649	0	0.57737	0.262479	0.453331	0	0	0	0.460284	1.89933	9.3946	0.76296	0.49231	-0.04831	0
d345	0	0	-0.143302	-0.056826	0.013618	0.076358	-0.281943	-0.012444	0.831822	-0.075709	0.005542	-0.178132	-0.146311	-0.113293	-0.190965	0.063344	0.702048	1.13287	1.10271	1.0992	1.15946	0.984816	0.466919	0.496778	0.534725	14.919	0.147212	0	0	0	0	0	0	0	6.75781	0	0.582318	0.389901	0	0	0	0	0	1.85503	9.40553	0.74839	0.4817	-0.03408	0
d346	0	0	-0.141676	-0.111934	-0.18487	0.316378	0.012419	-0.118352	0.974342	-0.076768	-0.087187	0.069534	0.095902	0.145483	0.008355	-0.081495	0.643531	0.946159	1.03292	0.907886	1.01552	1.11786	0.481217	0.53026	0.547527	11.5021	0.533924	0	0	0	1.99606	0	0	0	6.30924	0	0.533017	0.269121	0.476627	0	0	0	0.519677	1.95838	9.60255	0.77415	0.49524	-0.05217	0
d347	0	0	-0.17388	0.19461	-0.098962	2.21866	0.049466	-0.028059	0.587001	-0.067839	-0.024118	0.161659	0.151532	0.146053	0.033654	-0.054423	0.982743	0.83194	0.842345	0.92057	1.03636	1.00957	0.444385	0.47699	0.500088	23.703	0.131868	0	0	0	0	0	0	0	6.42292	0	0.542012	0.273001	0	0	0	0	0	1.91866	9.60883	0.74784	0.47623	-0.03155	0
d348	0	0	-0.141676	-0.111934	-0.18487	0.316378	0.012419	-0.118352	0.974342	-0.076768	-0.087187	0.069534	0.095902	0.145483	0.008355	-0.081495	0.643531	0.946159	1.03292	0.907886	1.01552	1.11786	0.481217	0.53026	0.547527	11.5021	0.533924	0	0	0	1.99606	0	0	0	6.30924	0	0.533017	0.269121	0.476627	0	0	0	0.519677	1.95838	9.60255	0.77415	0.49524	-0.05217	0
d349	0	0	-0.111144	-0.033015	-0.078028	0.006918	-0.080946	0.148574	1.29866	-0.067728	-0.044196	-0.012526	0.059839	0.104213	-0.050112	0.102042	0.649773	0.940926	0.884803	0.897782	0.984732	1.06267	0.540218	0.620443	0.627527	8.89714	0.421511	0	0	0	0	0	0	0	7.30199	0	0.64811	0	0	0	0	0	0	3.35516	9.12714	0.78333	0.51701	-0.07034	0
d350	0	0	-0.049766	0.175805	-0.19206	0.138003	-0.116899	-0.00139	1.3076	-0.018167	-0.068896	-0.146959	-0.084273	0.015462	-0.074909	-0.031572	0.697976	1.1111	1.15627	1.00301	1.04909	1.05568	0.687984	0.643848	0.517901	8.88495	0.107942	0	0	0	0	0	-2.9078	0	7.33984	0	0.655853	0.711522	0	0	0	0	0	1.74595	9.06487	0.82917	0.54423	-0.09654	0
d351	0	0	0.100034	-0.39365	-0.000484	-0.59141	-0.141254	0.020991	1.57556	0.069177	-0.000317	-0.049023	-0.073786	0.016461	-0.089661	0.003694	0.532976	1.01719	1.05533	0.985975	1.01962	0.981522	0.93193	0.824704	0.68328	6.72926	0.074142	0	0	0	0.83399	0	0	0	7.19761	0	0.652394	0	0.83399	0	0	0	0.83399	0	0	0.80381	0.5177	-0.07628	0
d352	0	0	-0.155199	0.01447	-0.151595	0.118393	-0.164394	0.037117	1.29707	-0.113505	-0.100522	-0.00423	0.021021	0.129375	-0.105561	-0.004083	0.640952	0.94778	1.02649	0.889689	1.0221	1.02426	0.560315	0.593587	0.615389	10.6779	0.057979	0	0	0	0	0	0	0	7.23161	0	0.645025	0	0	0	0	0	0	1.80933	9.09012	0.77642	0.50561	-0.06048	0
d353	0	0	-0.102168	0.124957	0.286436	-0.665899	-0.225345	0.277746	1.08861	-0.04717	0.144506	0.017014	0.062904	0.115153	-0.144154	-0.058383	0.993483	0.913394	0.878924	0.934834	1.13335	0.922421	0.544559	0.856166	0.732184	6.06136	0.246528	0	0	0	0	0	0	0	7.01983	0	0.613526	0.438763	0	-0.412568	0	0	0	0	0	0.80541	0.5253	-0.07272	0
d354	0	0	-0.101289	0.106404	-0.013248	0.579077	0.044999	-0.135422	1.01125	-0.051344	-0.005513	0.045751	0.057168	0.036472	0.028743	0.018465	0.997359	0.890503	0.809538	0.983568	0.967778	0.922655	0.529289	0.57913	0.54212	11.4636	0.46177	0	0	0	1.91492	0	0	0	7.00978	0	0.608828	0.401886	0.436616	0.476269	0	0	0.589283	1.78182	9.32269	0.7679	0.50376	-0.05582	0
d355	0	0	-0.20489	0.002353	-0.1346	0.739029	0.009087	-0.142706	1.27853	-0.141352	-0.110003	-0.038381	0.006713	0.010858	0.005711	-0.047924	0.642878	1.0394	0.963692	0.954655	0.940928	0.900396	0.525598	0.490681	0.523565	8.05703	0.203271	0	0	0	0.444561	0	0	0	7.23177	0	0.647398	0.340805	0.444561	0.568552	0	0	0.444561	1.80801	9.05812	0.78246	0.50833	-0.06494	0
d356	0	0	-0.17492	0.046344	-0.027365	0.749503	-0.008189	-0.108189	0.9715	-0.110599	-0.014344	0.127069	0.132774	0.167678	-0.005478	-0.090545	0.68579	0.884177	1.00179	0.875912	1.02665	1.07372	0.490157	0.497784	0.56011	12.6525	0.177284	0	0	0	0.962619	0	0	0	6.54617	0	0.560459	0.269315	0.479145	0	0	0	0.483474	1.91308	9.4731	0.75972	0.48389	-0.04271	0
d357	0	0	-0.257816	0.211317	-0.190015	1.8816	0.012287	-0.034733	0.735937	-0.081103	-0.053207	0.094343	0.102369	0.112541	0.008338	-0.063443	1.14735	0.8985	0.926643	0.910764	0.99858	0.997689	0.635814	0.673809	0.844397	21.6681	0.201759	0	0	0	0.597298	0	0	0	5.62053	0	0.453856	0.280394	0.597298	0	0	0	0.597298	2.0788	10.0476	0.77886	0.49439	-0.05178	0
d358	0	0	-0.334011	-0.052104	-0.204689	1.19888	-0.055972	-0.060867	0.96317	-0.102396	-0.04745	0.026876	0.046689	0.08082	-0.037413	-0.003923	0.644942	0.959896	0.947583	0.920366	0.996733	0.985582	0.484335	0.500128	0.508686	27.1372	0	0	0	0	0.937665	0	0	0	6.81803	0	0.589302	0.27227	0.468832	0	0	0	0.468832	1.85044	9.37747	0.75566	0.48551	-0.04095	0
d359	0	0	-0.202009	-0.149957	0.018877	-0.12856	0.012491	0.079154	1.09148	-0.097361	0.009098	0.079308	0.113895	0.139919	0.008585	0.065291	0.805593	0.910528	0.905603	0.886325	0.992455	1.06189	0.581319	0.62609	0.606654	10.5967	0.085344	0	0	0	0	0	0	0	7.19346	0	0.638037	0.270394	0	0	0	0	0	1.78556	9.13507	0.79185	0.4994	-0.05986	0
d360	0	0	-0.122803	-0.010452	-0.176885	0.177877	-0.192928	0.000452	1.04066	-0.072803	-0.078748	-0.133892	-0.079214	-0.049388	-0.127485	0.065708	0.630206	1.07995	1.03685	1.04674	1.09429	1.00529	0.496893	0.51001	0.521738	10.9429	0.011058	0	0	0	0	0	0	0	7.067	0	0.621393	0.402317	0	0	0	0	0	1.81061	9.21634	0.7625	0.48974	-0.04429	0
d361	0	0	-0.098704	-0.003446	-0.195384	0.181389	-0.148247	0.004942	0.982682	-0.056608	-0.081494	-0.142947	-0.093793	-0.074074	-0.098709	0.055284	0.63164	1.08096	1.04201	1.07124	1.07423	0.982987	0.491403	0.514279	0.522469	12.0961	0.101105	0	0	0	0	0	0	0	7.02276	0	0.615175	0.410686	0	0	0	0	0	1.81692	9.25108	0.75769	0.4874	-0.04092	0
d362	0	0	-0.143276	-0.041418	-0.044543	-0.075751	0.085595	0.008863	1.12238	-0.070103	-0.020172	0.081687	0.124882	0.100833	0.053963	0.090611	0.763548	0.88501	0.838275	0.895705	0.929549	1.04267	0.521425	0.597631	0.61387	10.4507	0.001742	0	0	0	0	0	0	0	7.15889	0	0.629534	0.271608	0	0.590474	0	0	0	1.80168	9.21376	0.79048	0.51652	-0.07133	0
d363	0	0	-0.154918	-0.025315	-0.110522	0.962791	-0.018851	-0.051387	0.78239	-0.071232	-0.040057	0.065724	0.050271	0.071045	-0.012565	-0.011641	0.776757	0.931535	0.96177	0.933817	0.995488	0.994378	0.449443	0.552542	0.581063	21.1527	0.193445	0	0	0	0.8111	0	0	0	6.76757	0	0.584302	0.256553	0.40555	0	0	0	0.40555	2.65579	10.85	0.74691	0.481	-0.037	0
d364	0	0	-0.154918	-0.025315	-0.110522	0.962791	-0.018851	-0.051387	0.78239	-0.071232	-0.040057	0.065724	0.050271	0.071045	-0.012565	-0.011641	0.776757	0.931535	0.96177	0.933817	0.995488	0.994378	0.449443	0.552542	0.581063	21.1527	0.193445	0	0	0	0.8111	0	0	0	6.76757	0	0.584302	0.256553	0.40555	0	0	0	0.40555	2.65579	10.85	0.74691	0.481	-0.037	0
d365	0	0	-0.154918	-0.025315	-0.110522	0.962791	-0.018851	-0.051387	0.78239	-0.071232	-0.040057	0.065724	0.050271	0.071045	-0.012565	-0.011641	0.776757	0.931535	0.96177	0.933817	0.995488	0.994378	0.449443	0.552542	0.581063	21.1527	0.193445	0	0	0	0.8111	0	0	0	6.76757	0	0.584302	0.256553	0.40555	0	0	0	0.40555	2.65579	10.85	0.74691	0.481	-0.037	0
d366	0	0	-0.154918	-0.025315	-0.110522	0.962791	-0.018851	-0.051387	0.78239	-0.071232	-0.040057	0.065724	0.050271	0.071045	-0.012565	-0.011641	0.776757	0.931535	0.96177	0.933817	0.995488	0.994378	0.449443	0.552542	0.581063	21.1527	0.193445	0	0	0	0.8111	0	0	0	6.76757	0	0.584302	0.256553	0.40555	0	0	0	0.40555	2.65579	10.85	0.74691	0.481	-0.037	0
d367	0	0	-0.160723	0.072903	-0.119906	0.327684	-0.116822	-0.052367	1.10769	-0.098043	-0.063043	-0.026187	0.00898	0.087989	-0.075193	-0.000476	0.704841	0.962799	0.964674	0.926165	1.04594	1.07095	0.498894	0.52639	0.575664	11.768	0.407676	0	0	0	0	0	0	0	7.11224	0	0.627746	0.333276	0	0	0	0	0	1.82351	9.18511	0.7695	0.50061	-0.05257	0
d368	0	0	-0.164814	-0.003934	-0.143071	0.998936	0.131279	-0.0769	0.745914	-0.083924	-0.049894	0.098997	0.097197	0.077368	0.090342	0.000799	0.83327	0.894721	0.901291	0.965667	0.953757	1.00207	0.457884	0.498036	0.491774	17.2399	0.018935	0	0	0	0.932642	0	0	0	6.51705	0	0.552263	0.267312	0.464976	0	0	0	0.467666	1.89419	9.56518	0.74688	0.47546	-0.03164	0
d369	0	0	-0.113907	0.148465	0.013203	0.206319	0.112232	0.030227	0.781721	-0.041461	0.003516	0.069699	0.059322	0.068613	0.071392	0.089814	0.917241	0.876099	0.876954	0.963368	0.928804	1.03962	0.657741	0.640446	0.67036	19.3684	0.007846	0	0	0	0	0	0	0	-1.03288	0	0	0.33069	0	0.405176	0	0	0	1.92919	9.45941	0.7625	0.49474	-0.04795	0
d370	0	0	0.247031	-0.735999	-0.192549	-1.46433	-0.201909	-0.061313	1.92202	0.071214	-0.048856	-0.10287	-0.088523	-0.063613	-0.126697	0.062733	0.795477	1.10133	1.09268	1.07815	1.08709	0.937988	0.917917	0.822288	0.628224	7.35185	0.033836	0	0	0	1.71413	0	0	0	6.84894	0	0.602861	0.397036	0.85444	0	0	0	0.859695	0	0	0.86923	0.56909	-0.13042	0
d371	0	0	0.095552	-0.365703	0.025611	-0.607337	-0.123466	0.096578	1.64312	0.068122	0.016944	0.004544	-0.038772	0.062588	-0.077608	0.008421	0.491282	0.967517	1.02993	0.946148	1.00236	1.00242	0.944517	0.824472	0.698295	6.26897	0.00727	0	0	0	0.832354	0	0	0	7.22488	0	0.656346	0	0.832354	0	0	0	0.832354	0	0	0.8101	0.52444	-0.08251	0
d372	0	0	-0.207728	0.013119	-0.041839	0.349544	-0.033909	-0.015381	1.46941	-0.159728	-0.028431	0.01397	0.059581	0.133951	-0.022152	0.022379	0.676049	0.942307	0.88187	0.8785	0.959321	1.06834	0.564307	0.581832	0.630707	7.43265	0.000819	0	0	0	0	0	0	0	7.43765	0	0.673805	0	0	0	0	0	0	1.74866	8.9445	0.77879	0.5	-0.05806	0
d373	0	0	0.037597	-0.448079	-0.196091	-0.71342	-0.102019	0.018898	1.1192	0.020286	-0.085253	0.023333	0.01716	0.099296	-0.06633	0.10235	0.679397	0.939806	0.948541	0.915498	0.996976	1.03954	0.905546	0.794725	0.616085	11.6623	0.099507	0	0	0	0.850923	0	0	0	6.978	0	0.619206	0	0.850923	0	0	0	0.850923	0	0	0.77756	0.49867	-0.05422	0
d374	0	0	-0.211072	0.224913	-0.218004	1.43069	0.056316	-0.074545	1.17761	-0.133374	-0.114374	0.160483	0.135202	0.117453	0.038774	-0.011163	0.825732	0.844919	0.855719	0.877627	0.962937	1.06018	0.519664	0.412399	1.23465	8.94384	0.252722	0	0	0	1.66618	0	0	0	6.51127	0	0.561861	0.376637	0.531005	0.182988	0	0	0.583865	1.90946	9.39628	0.75983	0.48488	-0.04176	0
d375	0	0	-0.207728	0.013119	-0.041839	0.349544	-0.033909	-0.015381	1.46941	-0.159728	-0.028431	0.01397	0.059581	0.133951	-0.022152	0.022379	0.676049	0.942307	0.88187	0.8785	0.959321	1.06834	0.564307	0.581832	0.630707	7.43265	0.000819	0	0	0	0	0	0	0	7.43765	0	0.673805	0	0	0	0	0	0	1.74866	8.9445	0.77879	0.5	-0.05806	0
d376	0	0	-0.209208	-0.025594	0.025255	0.02807	0.035321	0.009042	1.06428	-0.108132	0.011971	0.116596	0.167634	0.184734	0.022873	-0.06558	0.820083	0.854176	0.849408	0.830547	0.954669	1.0467	0.575844	0.593004	0.608584	12.7438	0.090457	0	0	0	0	0	0	0	6.79336	0	0.581688	0.275301	0	0	0	0	0	1.8755	9.46533	0.78067	0.50196	-0.05703	0
d377	0	0	-0.236274	0.009298	0.167737	0.666974	-0.27491	-0.174082	0.979404	-0.146207	0.094012	-0.121869	-0.097332	-0.096055	-0.185242	-0.050152	0.833662	1.08818	1.01827	1.06313	1.16318	0.884329	0.525291	0.49822	0.570307	12.7945	0.201393	0	0	0	0	0	0	0	7.0987	0	0.626452	0.460958	0	0	0	0	0	1.80927	9.18446	0.75309	0.48821	-0.04026	0
d378	0	0	-0.200622	-0.03455	-0.224426	1.27722	-0.02362	-0.08747	0.904312	-0.099001	-0.083433	0.103998	0.103984	0.100134	-0.015969	-0.006447	0.740491	0.895559	0.873679	0.888767	0.995697	1.03331	0.483721	0.512358	0.547916	16.5875	0.286629	0	0	0	0	0	0	0	6.86711	0	0.597379	0.283826	0	0	0	0	0	2.62019	10.7161	0.74876	0.48112	-0.03781	0
d379	0	0	-0.200622	-0.03455	-0.224426	1.27722	-0.02362	-0.08747	0.904312	-0.099001	-0.083433	0.103998	0.103984	0.100134	-0.015969	-0.006447	0.740491	0.895559	0.873679	0.888767	0.995697	1.03331	0.483721	0.512358	0.547916	16.5875	0.286629	0	0	0	0	0	0	0	6.86711	0	0.597379	0.283826	0	0	0	0	0	2.62019	10.7161	0.74876	0.48112	-0.03781	0
d380	0	0	-0.200622	-0.03455	-0.224426	1.27722	-0.02362	-0.08747	0.904312	-0.099001	-0.083433	0.103998	0.103984	0.100134	-0.015969	-0.006447	0.740491	0.895559	0.873679	0.888767	0.995697	1.03331	0.483721	0.512358	0.547916	16.5875	0.286629	0	0	0	0	0	0	0	6.86711	0	0.597379	0.283826	0	0	0	0	0	2.62019	10.7161	0.74876	0.48112	-0.03781	0
d381	0	0	-0.200622	-0.03455	-0.224426	1.27722	-0.02362	-0.08747	0.904312	-0.099001	-0.083433	0.103998	0.103984	0.100134	-0.015969	-0.006447	0.740491	0.895559	0.873679	0.888767	0.995697	1.03331	0.483721	0.512358	0.547916	16.5875	0.286629	0	0	0	0	0	0	0	6.86711	0	0.597379	0.283826	0	0	0	0	0	2.62019	10.7161	0.74876	0.48112	-0.03781	0
d382	0	0	-0.080557	-0.003663	-0.254852	0.9425	0.051646	-0.118849	0.787955	-0.032989	-0.088822	0.113796	0.107009	0.128373	0.034567	-0.074708	0.768993	0.914228	1.07286	0.926775	1.01088	1.09233	0.534252	0.610076	0.667319	16.6	0.585381	0	0	0	2.4283	0	0	0	5.93925	0	0.491207	0.274539	0.484174	0	0	0	0.723415	2.00803	9.81006	0.77475	0.49342	-0.05148	0
d383	0	0	-0.12678	-0.032707	-0.08975	0.875051	0.070756	-0.057996	0.750864	-0.059957	-0.03219	0.133426	0.152959	0.162984	0.048204	-0.049819	0.704746	0.884505	0.935073	0.892069	0.997541	1.04856	0.467308	0.50553	0.513293	17.9061	0.484065	0	0	0	0.970611	0	0	0	6.22294	0	0.522797	0.253044	0.485148	0.438821	0	0	0.485463	1.96224	9.65649	0.76	0.48344	-0.04136	0
d384	0	0	-1.21737	0.524541	-0.276588	5.26569	-0.140032	-0.059049	2.99832	-0.423634	-0.091667	0.011608	0.068154	0.137433	-0.087843	0.020776	0.721342	0.986329	0.938582	0.848855	1.05476	1.02654	0.906406	0.509204	0.507151	2.13317	0	0	0	0	0	0	0	0	1.32488	7.84339	0	0.347254	0	0	0	0	0	0	0	0.87838	0.58919	-0.1455	0
d385	0	0	-0.082505	0.017254	0.773667	2.01832	0.160505	0.772832	3.89851	-0.028547	0.199772	0.063793	-0.061208	-0.143952	0.062294	-0.433969	1.07708	0.981355	1.06201	0.950546	0.914288	1.27495	0.446939	0.523281	0.71129	4.37093	0.131177	0	0	0	0	0	0	0	7.46875	0	0.662914	0.46943	0	0	14.4068	0	0	1.32452	9.05133	0.91847	0.60462	-0.16268	0
d386	0	0	-0.126793	0.044037	-0.069649	0.537992	-0.112695	-0.074927	1.17089	-0.083188	-0.034944	-0.041838	-0.016871	-0.002336	-0.075769	0.092159	0.684019	1.02473	1.00432	1.0295	1.08368	1.02432	0.439493	0.462894	0.480654	8.47555	0.164845	0	0	0	0	0	0	0	7.04046	0	0.621072	0.2679	0	0	0	0	0	1.82223	9.18958	0.76842	0.49348	-0.05008	0
d387	0	0	-0.112701	0.003043	-0.067136	-0.565204	-0.234436	-0.213592	1.9826	-0.075934	-0.047172	-0.08846	0.025315	0.059462	-0.141034	0.106916	0.993829	1.0212	1.0792	1.00472	1.17038	1.03267	0.706859	0.725603	0.739424	3.27985	0.136535	0	0	0	0	0	0	0	7.5129	0	0.681333	0	0	0	0	0	0	1.74311	8.93396	0.86296	0.57636	-0.1361	0
d388	0	0	-0.277055	-0.025955	-0.325526	0.764534	0.103496	-0.127182	0.831935	-0.112025	-0.108823	0.13638	0.116385	0.099912	0.073659	-0.03218	1.00633	0.84822	0.87291	0.914824	0.953961	0.971623	0.515688	0.61851	0.590886	14.353	0.238457	0	0	0	0	0	0	0	7.04873	0	0.614577	0.289243	0	0	0	0	0	3.56745	9.28321	0.76995	0.48143	-0.04201	0
d389	0	0	0.032	0.139265	-0.030919	0.224493	-0.170384	0.159257	1.33014	0.015609	-0.012385	-0.002559	0.005829	0.080523	-0.113345	0.085165	0.811292	0.966851	1.10233	0.948178	1.07872	1.0733	0.644051	0.552469	0.536403	8.27966	0.068278	0	0	0	0	0	0	0	7.37621	0	0.657789	0.748605	0	0	0	0	0	1.72673	9.07854	0.80081	0.51614	-0.07101	0
d390	0	0	-0.0621	-0.051553	-0.188218	0.43115	-0.076147	-0.066405	0.963947	-0.039596	-0.088278	0.077687	0.084153	0.144721	-0.049178	0.023897	0.59268	0.902892	1.0338	0.88452	1.02323	1.11254	0.516088	0.546699	0.556563	14.688	0.054528	0	0	0	0	0	0	0	6.89275	0	0.6019	0.296474	0	0	0	0	0	1.86424	9.28763	0.76296	0.49231	-0.04831	0
d391	0	0	0.104839	-0.430485	-0.191764	-0.672037	-0.218233	0.072906	1.57823	0.073376	-0.125063	0.019706	0.02782	0.096694	-0.13509	0.045655	0.457643	0.942901	0.984779	0.91223	1.05593	1.03568	0.932974	0.83023	0.695361	7.56348	0.02756	0	0	0	0.831612	0	0	0	7.08558	0	0.636676	0	0.831612	0	0	0	0.831612	0	0	0.80833	0.52875	-0.08475	0
d392	0	0	0.180952	-0.504122	-0.281433	-2.28835	0.035287	-0.041336	0.816823	0.076846	-0.100504	-0.05685	-0.008914	0.079632	0.022804	-0.000509	0.670438	0.989929	1.015	0.963197	0.941079	1.06094	0.696086	0.946705	0.58902	13.7979	0.008013	0	0	0	0	0	0	0	6.58112	0	0.552121	0	0	0	0	0	0	0	0	0.78525	0.50699	-0.05911	0
d393	0	0	-0.204947	0.010724	-0.039341	0.424246	-0.073294	-0.235788	1.47104	-0.119895	-0.021624	-0.031153	-0.005177	0.04456	-0.049754	0.062066	0.816019	0.996527	0.989359	0.951499	1.0031	0.974054	0.622451	0.785532	0.731814	8.63306	0.196916	0	0	0	0.89619	0	0	0	7.24115	0	0.64226	0	0.448095	0	0	0	0.448095	1.74188	9.12725	0.77163	0.4997	-0.05396	0
d394	0	0	-0.181066	0.130084	-0.063678	1.7155	0.054689	-0.120728	0.915434	-0.070458	-0.017929	0.135831	0.118395	0.125151	0.035963	-0.013025	1.16937	0.829471	0.921063	0.927932	0.987504	1.07269	0.613527	0.684889	0.726636	16.6004	0.167101	0	0	0	0	0	0	0	6.61164	0	0.559095	0.30819	0	0	0	0	0	1.86137	9.57811	0.78387	0.49737	-0.05484	0
d395	0	0	0.093138	-0.480758	-0.189034	-0.849181	-0.189233	0.128529	1.07381	0.042698	-0.08831	-0.096249	-0.081384	-0.014552	-0.121569	0.091509	0.728582	1.06382	1.03646	1.00398	1.0618	1.01314	0.864789	0.779745	0.638893	11.4258	0	0	0	0	0.85958	0	0	0	6.85963	0	0.602058	0	0.85958	0	0	0	0.85958	0	0	0.77778	0.50476	-0.05574	0
d396	1	0	-0.099421	-0.14491	0.000175	0.065331	0.026223	-0.102577	0.739997	-0.03658	5.5e-05	0.086378	0.122887	0.122112	0.018082	0.020543	0.692995	0.919458	0.933314	0.909712	1.00868	0.999301	0.551428	0.598355	0.512873	20.9497	0.29871	0	1	0	0	0	0	0.422958	6.76634	0	0.579865	0.27252	0	0	0	0.422958	0	1.83405	9.45272	0.77413	0.49278	-0.05047	0
d397	0	0	-0.192646	-0.049978	-0.158134	0.383629	-0.076548	-0.077347	1.02968	-0.12412	-0.092487	-0.034957	1.3e-05	0.053319	-0.051627	-0.010512	0.743447	1.01289	1.02387	0.958782	1.00703	1.04057	0.575512	0.611352	0.611644	12.1645	0.123798	0	0	0	0	0	0	0	7.13823	0	0.630604	0	0	0	0	0	0	1.8119	9.17506	0.75513	0.4849	-0.04045	0
d398	0	0	-0.039912	0.079411	0.019969	0.361255	-0.186385	-0.030037	0.770754	-0.017545	0.006624	-0.118062	-0.099472	-0.108512	-0.125807	0.042087	0.862178	1.05007	1.03811	1.11569	1.13792	0.971739	0.498663	0.561246	0.614646	18.2779	0.246309	0	0	0	0	0	0	0	6.60296	0	0.556774	0.402279	0	0	0	0	0	1.86365	9.60515	0.74533	0.48251	-0.03473	0
d399	0	0	-0.202596	0.006096	-0.20933	1.07563	-0.023286	-0.118347	0.911144	-0.116427	-0.103171	0.107975	0.111987	0.136307	-0.015342	-0.013672	0.722956	0.885517	0.87133	0.865358	0.997842	1.09574	0.536662	0.488913	0.543009	14.3629	0.163276	0	0	0	0	0	0	0	6.99753	0	0.613549	0.333276	0	0	0	0	0	1.83585	9.24611	0.75939	0.48856	-0.04286	0
d400	0	0	-0.108458	0.007226	-0.103292	0.682204	-0.071708	-0.217474	0.911163	-0.067022	-0.058511	0.06944	0.084641	0.114922	-0.046405	-0.003334	0.623846	0.935742	1.0293	0.907962	1.04232	1.00789	0.478798	0.529386	0.566637	14.5909	0.363198	0	0	0	0.911094	0	0	0	6.84778	0	0.596905	0.262611	0.453304	0	0	0	0.45779	1.87283	9.30533	0.76296	0.49231	-0.04831	0
d401	0	0	-0.244836	0.390447	-0.53779	2.03176	0.114323	0.225678	1.17848	-0.099889	-0.153373	0.039462	0.008331	0.011372	0.079014	0.290339	0.873711	0.96912	1.03725	0.994509	0.930646	1.16333	0.486423	0.529875	0.559826	10.9534	0.287344	0	0	0	0	0	0	0	6.05919	0	0.496877	0.309852	0	0	0	0	0	1.88661	9.86943	0.77515	0.49798	-0.05228	0
d402	0	0	-0.146725	-0.157556	-0.043983	-0.277684	0.128452	0.103606	0.921836	-0.065428	-0.017218	0.073647	0.106669	0.122448	0.087748	-0.004093	0.766279	0.914476	0.906941	0.891084	0.892475	1.04699	0.552953	0.638119	0.609606	15.0306	0.313075	0	0	0	0	0	0	0	7.07302	0	0.623431	0.258684	0	0.579709	0	0	0	1.8185	9.19638	0.78	0.4927	-0.05257	0
d403	0	0	-0.157633	0.149874	-0.07543	0.510728	0.121683	-0.082714	1.53674	-0.118152	-0.053867	0.048613	0.039182	0.095394	0.077525	0.008084	0.465998	0.963557	1.10029	0.962675	0.958943	1.15514	0.698097	0.499649	0.571433	5.39566	0.067535	0	0	0	0.890343	0	0	0	7.17934	0	0.655184	0.264317	0.890343	-1.03632	0	0	0.890343	1.82183	8.88987	0.80617	0.51693	-0.08022	0
d404	0	0	-0.130031	0.061629	-0.110134	1.27412	0.073213	-0.219054	0.795346	-0.084115	-0.066025	0.164298	0.163378	0.176097	0.048424	-0.022051	0.69073	0.868108	0.984567	0.863902	1.00392	1.0487	0.467524	0.508538	0.564034	16.4198	0.087684	0	0	0	1.66334	0	0	0	6.61729	0	0.570783	0.237651	0.378871	0	0	0	0.442075	1.91024	9.40667	0.75833	0.48465	-0.04465	0
d405	0	0	-0.188213	0.038014	-0.084447	0.820797	0.159807	0.009991	0.886588	-0.098922	-0.036826	0.136741	0.137979	0.092469	0.100776	-0.105455	0.820637	0.848702	0.937164	0.967792	0.944465	1.04928	0.523331	0.571531	0.645438	15.6691	0.095486	0	0	0	0.521035	0	0	0	6.26006	0	0.52372	0.283849	0.521035	0.559179	0	0	0.521035	1.96254	9.6941	0.77222	0.50095	-0.05637	0
d406	0	0	0.180952	-0.504122	-0.281433	-2.28835	0.035287	-0.041336	0.816823	0.076846	-0.100504	-0.05685	-0.008914	0.079632	0.022804	-0.000509	0.670438	0.989929	1.015	0.963197	0.941079	1.06094	0.696086	0.946705	0.58902	13.7979	0.008013	0	0	0	0	0	0	0	6.58112	0	0.552121	0	0	0	0	0	0	0	0	0.78525	0.50699	-0.05911	0
d407	0	2	0.134076	-0.411385	-0.03557	-0.876012	-0.082135	-0.051995	1.41861	0.085743	-0.020827	-0.005792	-0.029984	0.066418	-0.054551	0.104411	0.564473	0.984904	1.02217	0.932525	0.980539	1.02526	0.922991	0.817213	0.653235	9.19037	0.033019	0	0	2	0.835697	0	0	0	7.00937	0	0.625782	0	0.835697	0	0	0	0.835697	0	0	0.79187	0.52161	-0.079	0
d408	0	0	-0.223474	0.141915	-0.065375	1.76827	0.056525	-0.10167	1.02366	-0.091946	-0.021245	0.194957	0.182239	0.142537	0.036587	-0.026663	1.01598	0.770454	0.805066	0.871015	0.970826	1.05036	0.562081	0.629076	0.759183	13.1239	0.112843	0	0	0	0	0	0	0	6.84854	0	0.587158	0.308039	0	0	0	0	0	3.50374	9.44635	0.79286	0.50909	-0.06732	0
d409	0	0	-0.23511	0.218257	-0.203685	1.44651	0.012109	-0.024073	1.26934	-0.153802	-0.117484	0.183836	0.157237	0.146677	0.00832	-0.003508	0.841566	0.823847	0.833845	0.833405	0.986954	1.10819	0.525078	0.404142	1.2738	8.17125	0.062797	0	0	0	1.64872	0	0	0	6.59079	0	0.572296	0.372163	0.52653	0.195613	0	0	0.577895	1.89842	9.33784	0.76667	0.48774	-0.04633	0
d410	0	0	-0.109275	-0.125435	0.191189	1.20772	0.208816	0.033765	0.715747	-0.034111	0.050772	0.160107	0.158608	0.151942	0.143096	0.015403	1.03117	0.828495	0.841644	0.860308	0.867715	1.02564	0.582426	0.727865	0.744755	23.1463	0.329076	0	0	0	0	0	0	0	6.22709	0	0.518466	0.253714	0	0.476265	0	0	0	1.95829	9.73958	0.78083	0.49428	-0.05268	0
d411	0	0	-0.377259	-0.188562	-0.090284	-0.174518	-0.12062	0.01631	1.49447	-0.12197	-0.023882	-0.086001	-0.014904	0.071571	-0.078725	0.077829	0.616801	1.04343	1.0066	0.941106	1.02545	1.07117	0.581903	0.584097	0.542736	15.1519	0	0	0	0	0	0	0	0	7.12132	0	0.625065	0	0	0	0	0	0	1.78437	9.22705	0.79902	0.51477	-0.07161	0
d412	0	0	-0.036197	-0.102465	-0.292647	-1.60897	-0.148038	-0.168902	2.52984	-0.017263	-0.129354	-0.07855	0.003968	0.089222	-0.092912	0.09226	0.375044	1.04542	1.00698	0.904708	1.00517	0.973527	0.571544	0.854246	0.709304	7.05624	0.164291	0	0	0	0	0	0	0	7.13501	0	0.63174	0	0	0	0	0	0	1.90294	9.00017	0.82593	0.54589	-0.10471	0
d413	0	0	-0.336101	0.065228	-0.211089	0.533466	-0.081315	0.01866	1.89286	-0.145903	-0.075757	0.035824	0.115749	0.192498	-0.051191	0.032164	0.590163	0.915374	0.965925	0.819881	0.977194	1.00387	0.556989	0.573954	0.598085	12.2152	0.162837	0	0	0	0	0	0	0	6.9092	0	0.598577	0	0	0	0	0	0	1.82091	9.34942	0.80063	0.52874	-0.08452	0
d414	0	0	0.001268	-0.085569	0.049625	-0.922945	0.021902	0.186146	0.680823	0.000577	0.023158	0.040052	0.071121	0.046809	0.015038	0.008927	0.666962	0.943476	0.901202	0.957364	0.972918	1.01057	0.628282	0.89233	0.763912	17.459	0.334968	0	0	0	0	0	0	0	7.12292	0	0.629572	0.252574	0	0	0	0	0	3.27888	0	0.7657	0.48052	-0.03752	0
d415	0	0	-0.171923	0.069707	0.086889	0.518751	0.083598	-0.094977	1.08289	-0.102419	0.04061	0.100117	0.143215	0.153804	0.053744	-0.001311	0.778934	0.880913	0.862329	0.868556	0.951715	1.07062	0.498122	0.505508	0.516221	12.0119	0.002711	0	0	0	0	0	0	0	6.75458	0	0.582539	0.2791	0	0.622252	0	0	0	1.88814	9.40242	0.77259	0.49691	-0.05291	0
d416	0	0	-0.274148	0.042558	0.152944	0.871137	-0.318956	-0.175226	1.00612	-0.147355	0.074459	-0.119818	-0.087534	-0.071308	-0.218435	-0.079319	0.85889	1.091	1.02375	1.04506	1.20002	0.920718	0.559256	0.513267	0.589957	12.3261	0.201393	0	0	0	0	0	0	0	7.19124	0	0.635941	0.472439	0	0	0	0	0	1.78076	9.1609	0.76235	0.49205	-0.04411	0
d417	0	0	0.061168	0.101183	0.214249	-0.114795	-0.106108	0.091082	1.67715	0.037021	0.096998	-0.014531	0.048356	0.011968	-0.066109	-0.120508	0.776185	0.920282	0.916462	1.076	1.14442	1.0108	0.665565	0.677945	0.80821	5.23184	0.231422	0	0	0	0	0	0	0	7.42527	0	0.65907	0	0	0	0	0	0	1.71867	9.11628	0.84624	0.54902	-0.10969	0
d418	0	0	-0.345586	-0.050482	-0.205773	1.20406	-0.026271	-0.083378	0.965601	-0.106021	-0.041217	0.027957	0.046593	0.081005	-0.01756	0.004066	0.609542	0.957961	0.940579	0.916553	0.973351	1.01158	0.486544	0.490313	0.480283	26.849	0	0	0	0	0.937665	0	0	0	6.80579	0	0.587903	0.295794	0.468832	0.578762	0	0	0.468832	1.85094	9.38278	0.75566	0.48551	-0.04095	0
d419	0	0	-0.184431	0.007795	-0.12569	0.277015	-0.127697	-0.111519	1.36236	-0.140397	-0.086796	0.010901	0.044124	0.126475	-0.082267	-0.029345	0.719447	0.953559	0.985901	0.8931	1.01703	1.02523	0.567446	0.573496	0.599058	8.97738	0.062041	0	0	0	0.437622	0	0	0	7.28071	0	0.651634	0	0.437622	0	0	0	0.437622	1.79356	9.05726	0.77748	0.50307	-0.05938	0
d420	0	0	-0.209254	-0.098283	-0.164257	0.527595	-0.082192	-0.018411	0.695267	-0.102749	-0.064843	-0.068614	-0.043387	-0.030288	-0.056715	-0.000191	0.649144	1.05835	1.03059	1.02189	1.02469	0.951274	0.550115	0.571478	0.552215	18.4237	0	0	0	0	4.98933	0	0	0	6.90183	0	0.600035	0.427405	0.461724	0	0	0	0.5905	1.84559	9.3241	0.73675	0.47205	-0.02626	0
d421	0	0	-0.085872	0.159547	0.083787	0.174219	0.063984	-0.081763	1.00907	-0.043996	0.033046	0.071732	0.102817	0.097862	0.041038	-0.023025	0.913121	0.833087	0.784727	0.955148	0.972977	0.961142	0.561733	0.633061	0.696766	14.8096	0.266559	0	0	0	0	0	0	0	6.84337	0	0.588962	0	0	0	0	0	0	1.88364	9.42075	0.76667	0.50395	-0.05552	0
d422	0	0	-0.171434	0.07101	-0.204625	1.43096	0.049199	-0.094313	0.652994	-0.078374	-0.082314	0.11046	0.128269	0.133086	0.033668	-0.079001	0.838037	0.929828	1.03383	0.924471	1.02648	1.05826	0.514691	0.55865	0.618215	22.2837	0.519456	0	0	0	1.87653	0	0	0	5.76074	0	0.473577	0.253382	0.457748	0	0	0	0.49068	2.03568	9.87243	0.75631	0.47961	-0.03866	0
d423	0	0	-0.171434	0.07101	-0.204625	1.43096	0.049199	-0.094313	0.652994	-0.078374	-0.082314	0.11046	0.128269	0.133086	0.033668	-0.079001	0.838037	0.929828	1.03383	0.924471	1.02648	1.05826	0.514691	0.55865	0.618215	22.2837	0.519456	0	0	0	1.87653	0	0	0	5.76074	0	0.473577	0.253382	0.457748	0	0	0	0.49068	2.03568	9.87243	0.75631	0.47961	-0.03866	0
d424	0	0	-0.171434	0.07101	-0.204625	1.43096	0.049199	-0.094313	0.652994	-0.078374	-0.082314	0.11046	0.128269	0.133086	0.033668	-0.079001	0.838037	0.929828	1.03383	0.924471	1.02648	1.05826	0.514691	0.55865	0.618215	22.2837	0.519456	0	0	0	1.87653	0	0	0	5.76074	0	0.473577	0.253382	0.457748	0	0	0	0.49068	2.03568	9.87243	0.75631	0.47961	-0.03866	0
d425	0	0	-0.11895	-0.003718	-0.1666	0.842772	0.008364	-0.144811	0.830611	-0.071149	-0.088226	0.083877	0.100018	0.117012	0.005599	-0.07973	0.686413	0.945852	1.05761	0.929795	1.03142	1.07807	0.4643	0.510272	0.574303	15.0399	0.629287	0	0	0	1.41211	0	0	0	6.07669	0	0.50788	0.263376	0.461198	0	0	0	0.488714	1.99533	9.7092	0.75697	0.48346	-0.04152	0
d426	0	0	-0.11895	-0.003718	-0.1666	0.842772	0.008364	-0.144811	0.830611	-0.071149	-0.088226	0.083877	0.100018	0.117012	0.005599	-0.07973	0.686413	0.945852	1.05761	0.929795	1.03142	1.07807	0.4643	0.510272	0.574303	15.0399	0.629287	0	0	0	1.41211	0	0	0	6.07669	0	0.50788	0.263376	0.461198	0	0	0	0.488714	1.99533	9.7092	0.75697	0.48346	-0.04152	0
d427	0	0	-0.106826	-0.003514	-0.166764	0.976721	0.033402	-0.142389	0.708324	-0.059568	-0.080779	0.105502	0.119182	0.131702	0.022418	-0.071869	0.698805	0.929583	1.04761	0.919979	1.0258	1.06889	0.471723	0.522087	0.585977	18.8912	0.585381	0	0	0	1.85979	0	0	0	5.84398	0	0.482645	0.262611	0.453304	0	0	0	0.488413	2.02768	9.82718	0.75152	0.47952	-0.03758	0
d428	0	0	-0.106826	-0.003514	-0.166764	0.976721	0.033402	-0.142389	0.708324	-0.059568	-0.080779	0.105502	0.119182	0.131702	0.022418	-0.071869	0.698805	0.929583	1.04761	0.919979	1.0258	1.06889	0.471723	0.522087	0.585977	18.8912	0.585381	0	0	0	1.85979	0	0	0	5.84398	0	0.482645	0.262611	0.453304	0	0	0	0.488413	2.02768	9.82718	0.75152	0.47952	-0.03758	0
d429	0	0	-0.106826	-0.003514	-0.166764	0.976721	0.033402	-0.142389	0.708324	-0.059568	-0.080779	0.105502	0.119182	0.131702	0.022418	-0.071869	0.698805	0.929583	1.04761	0.919979	1.0258	1.06889	0.471723	0.522087	0.585977	18.8912	0.585381	0	0	0	1.85979	0	0	0	5.84398	0	0.482645	0.262611	0.453304	0	0	0	0.488413	2.02768	9.82718	0.75152	0.47952	-0.03758	0
d430	0	0	-0.106826	-0.003514	-0.166764	0.976721	0.033402	-0.142389	0.708324	-0.059568	-0.080779	0.105502	0.119182	0.131702	0.022418	-0.071869	0.698805	0.929583	1.04761	0.919979	1.0258	1.06889	0.471723	0.522087	0.585977	18.8912	0.585381	0	0	0	1.85979	0	0	0	5.84398	0	0.482645	0.262611	0.453304	0	0	0	0.488413	2.02768	9.82718	0.75152	0.47952	-0.03758	0
d431	0	0	-0.277051	0.022482	-0.268923	1.43802	0.002867	0.014531	1.39649	-0.100513	-0.079976	0.103838	0.11312	0.152895	0.001854	0.011573	0.600524	0.895646	0.908816	0.863788	0.975464	0.961431	0.443337	0.471195	0.495173	16.7737	0	0	0	0	0	0	0	0	6.85007	0	0.595144	0.251918	0	0.45036	0	0	0	1.84741	9.32991	0.78333	0.50761	-0.06538	0
d432	0	0	-0.214253	0.280007	-0.415543	0.151079	-0.138973	-0.0113	2.41248	-0.122512	-0.312288	-0.217257	-0.17636	-0.08896	-0.09386	0.387999	0.839242	1.19122	1.17734	1.08229	1.01682	0.777165	0.589644	0.737388	0.722348	2.53181	0.100223	0	0	0	0	0	0	0	7.82476	0	0.728413	0.382963	0	0	0	0	0	1.56393	8.68377	0.85467	0.54762	-0.11063	0
d433	0	0	0.007504	0.007489	-0.063198	0.887976	0.113132	-0.046484	0.779439	0.00348	-0.024885	0.130681	0.142319	0.127132	0.074607	-0.062548	0.816262	0.876705	0.946571	0.921582	0.97781	1.03677	0.467009	0.534983	0.572986	17.3729	0.539104	0	0	0	0.962911	0	0	0	6.30403	0	0.532035	0.252521	0.479389	0.611825	0	0	0.483523	1.95168	9.61222	0.76243	0.49041	-0.04804	0
d434	0	0	-0.312852	0.103074	-0.238201	0.304851	-0.324121	-0.519759	3.30064	-0.181858	-0.174274	-0.064095	0.0416	0.184093	-0.190621	-0.130659	0.81742	1.03006	1.07434	0.823426	1.14684	1.05763	0.638792	0.700712	0.791507	4.82284	0	0	0	0	0	0	0	0	7.44549	0	0.675895	0	0	0	0	0	0	1.73791	8.92386	0.86092	0.59576	-0.156	0
d435	0	0	-0.057607	-0.11848	-0.050729	-0.427965	0.143197	-0.072706	2.13428	-0.055788	-0.070279	-0.124885	-0.111511	-0.09652	0.094497	-0.128628	0.724062	1.12464	1.0281	1.04059	0.811699	0.9571	0.77905	0.740605	0.738845	3.89537	0.082339	1	0	0	0	0	0	0	0	0	0	0.532894	0	0	0	0	0	0	0	0.84028	0.51611	-0.07897	0
d436	0	0	-0.25904	0.110459	-0.107321	0.699244	-0.05871	0.19337	0.869462	-0.135483	-0.046416	0.14153	0.146805	0.180069	-0.039542	0.032889	0.720829	0.848598	0.83657	0.836281	0.989715	1.18301	0.555797	0.43197	1.05078	15.1367	0.609177	0	0	0	1.13268	0	0	0	6.41589	0	0.54304	0.419367	0.541171	0	0	0	0.591513	1.8995	9.57255	0.75137	0.48234	-0.03446	0
d437	0	0	0.069339	-0.044723	0.392485	-0.490242	-0.053956	0.03908	1.15705	0.020918	0.098441	0.097728	0.140222	0.147317	-0.036165	-0.142644	0.799301	0.890599	0.986366	0.914993	1.07618	1.14378	0.732113	0.673979	0.683584	10.2655	0.467198	0	0	0	0	0	0	0	6.97129	0	0.595034	0.322037	0	0	0	0	0	1.8189	9.48415	0.83827	0.53825	-0.09425	0
d438	2	0	0.13758	-0.418164	-0.017864	-1.09658	-0.086561	-0.055592	1.40901	0.0848	-0.010081	-0.001885	-0.021781	0.062178	-0.057239	0.100329	0.577992	0.978969	1.00606	0.938342	0.991206	1.03552	0.924146	0.818875	0.656344	8.97217	0.033019	0	2	0	0.836301	0	0	1.34406	7.01058	0	0.626177	0	0.836301	0	0	0.660771	0.836301	0	0	0.82207	0.53522	-0.09261	0
d439	0	0	-0.23302	0.101223	0.043787	0.165432	0.000464	0.258126	0.901477	-0.12009	0.019205	-0.0133	0.0063	0.084126	0.000311	0.045778	0.812924	0.957855	0.940977	0.934819	0.945629	1.14136	0.538317	0.485142	1.04003	14.386	0	0	0	0	1.13268	0	0	0	6.77491	0	0.583857	0.509515	0.541171	0	0	0	0.591513	1.86172	9.40234	0.75311	0.48437	-0.03594	0
d440	0	0	-0.253823	0.061608	0.123844	1.63933	0.08143	-0.070897	0.778971	-0.109288	0.040615	0.149895	0.147615	0.056627	0.052235	-0.014312	1.04118	0.830118	0.869031	1.00941	1.04501	1.10533	0.516023	0.536958	0.602938	17.8354	0.056631	0	0	0	0	0	0	0	6.19465	0	0.512588	0.298962	0	0.503728	0	0	0	1.95422	9.79655	0.77264	0.49792	-0.05305	0
d441	0	0	0.269916	-1.15936	-0.435383	-1.93658	-0.393165	0.056866	2.93013	0.07309	-0.11029	0.003047	-0.047708	0.054463	-0.225967	0.105539	0.639943	1.02092	1.03996	0.921452	1.14872	0.999958	0.988514	0.829467	0.656851	5.99276	0	0	0	0	2.5989	0	0	0	6.9403	0	0.613011	0	0.866299	0	0	0	0.866299	0	0	0.88364	0.61165	-0.16972	0
d442	0	0	-0.155057	0.034682	-0.153788	0.187549	-0.080775	-0.208993	1.36398	-0.115088	-0.098059	0.011037	0.064209	0.122132	-0.051552	-0.009725	0.674747	0.913737	0.972098	0.900872	1.0216	0.990764	0.544482	0.596008	0.614677	9.78345	0.161202	0	0	0	0	0	0	0	7.21203	0	0.641823	0	0	0	0	0	0	1.81328	9.1106	0.78034	0.51049	-0.06469	0
d443	0	0	-0.155199	0.01447	-0.151595	0.118393	-0.164394	0.037117	1.29707	-0.113505	-0.100522	-0.00423	0.021021	0.129375	-0.105561	-0.004083	0.640952	0.94778	1.02649	0.889689	1.0221	1.02426	0.560315	0.593587	0.615389	9.05063	0.057979	0	0	0	0	0	0	0	7.23161	0	0.645025	0	0	0	0	0	0	1.80933	9.09012	0.77642	0.50561	-0.06048	0
d444	0	0	-0.356424	-0.340398	-0.080773	-0.35547	0.10294	0.127348	0.958796	-0.081398	-0.016349	0.127434	0.187168	0.199276	0.067446	-0.029467	0.761982	0.864382	0.896355	0.834706	0.921505	0.960633	0.591976	0.637323	0.602675	28.6898	0.042344	0	0	0	0	0	0	0	6.0554	0	0.496215	0.283937	0	0	0	0	0	1.95415	9.88943	0.78348	0.50218	-0.05888	0
d445	0	0	0.016487	0.116684	-0.021333	1.79608	-0.032485	-0.004485	?	0.019088	-0.015	0.129605	0.117577	0.088583	-0.076721	0	0.305429	0.486965	0.535691	0.499931	0.466487	0.30559	0	0	0	17.6621	0	0	0	0	0	0	0	0	0	0	0	0	0	0	0	0	0	0	0	0.73675	0.57924	-0.13434	0
d446	0	0	-0.069973	0.000691	-0.061831	-0.068206	-0.068245	-0.151399	1.41888	-0.042138	-0.03011	0.050722	0.129589	0.126891	-0.041875	0.078658	0.715247	0.908349	0.849828	0.918232	1.06762	0.974345	0.56114	0.586513	0.617291	7.66374	0.021193	0	0	0	0	0	0	0	7.30471	0	0.649867	0.522044	0	0	0	0	0	1.7559	9.1033	0.79444	0.5225	-0.0785	0
d447	0	0	-0.385078	-0.212958	-0.116399	-0.010204	-0.081472	0.032811	1.35691	-0.119694	-0.03	-0.088862	-0.025993	0.048885	-0.05392	0.083285	0.635777	1.05521	1.01954	0.960331	1.00655	1.06945	0.582363	0.59155	0.547331	17.0307	0	0	0	0	0	0	0	0	7.10948	0	0.623676	0	0	0	0	0	0	1.78799	9.2328	0.7886	0.5063	-0.0629	0
d448	0	0	0.033421	0.12049	0.075853	1.82954	0.282511	-0.072611	0.713716	0.011332	0.018591	0.15873	0.136905	0.101039	0.181864	0.023958	1.07681	0.795057	0.780999	0.914423	0.833704	0.959132	0.533338	0.712349	0.763697	21.3678	0.1034	0	0	0	0.902973	0	0	0	6.05927	0	0.498714	0.2848	0.451232	0.458396	0	0	0.451741	1.9827	9.85269	0.77287	0.50132	-0.05556	0
d449	0	0	-0.11629	0.052056	-0.021322	0.377657	-0.176188	-0.106382	1.26511	-0.061577	-0.010656	0.035072	0.065926	0.083221	-0.110504	0.058457	0.757802	0.934956	0.916836	0.918991	1.07784	1.03634	0.493469	0.53218	0.586817	7.98707	0.221315	0	0	0	1.00037	0	0	0	7.2025	0	0.636349	0.389072	0.429153	0.502034	0	0	0.571217	1.79022	9.17013	0.78293	0.51758	-0.06983	0
d450	0	0	0.071364	-0.23683	0.077299	-0.537501	-0.031845	-0.026116	0.89488	0.034664	0.032725	-0.004298	-0.004255	0.037158	-0.02173	-0.029148	0.626507	1.0297	1.15057	1.01274	1.02609	1.06185	0.85647	0.514703	0.716512	10.1943	0.054397	0	0	0	1.27645	0	0	0	7.02201	0	0.630483	0.272853	0.489594	0	0	0	0.786859	0	0	0.79394	0.49939	-0.05745	0
d451	0	0	-0.072531	0.11279	-0.073687	0.148428	0.040297	-0.09214	0.998299	-0.037255	-0.028737	0.046	0.060368	0.067259	0.026114	-0.007813	0.864801	0.864627	0.907667	0.996984	0.992683	0.969139	0.567657	0.632912	0.686724	13.7563	0.07499	0	0	0	0	0	0	0	6.98496	0	0.606902	0	0	0	0	0	0	1.83138	9.3262	0.76322	0.49755	-0.05071	0
d452	0	0	0.029239	-0.081059	-0.036406	-0.694836	-0.061881	-0.042924	1.03574	0.019503	-0.026778	0.029047	0.077426	0.069944	-0.039782	0.092076	0.632811	0.942256	0.860913	0.925018	0.998239	1.00093	0.540034	0.836843	0.756832	7.8788	0.14583	0	0	0	0.984837	0	0	0	7.17424	0	0.638523	0.381253	0.424934	0.527137	0	0	0.559904	3.42971	0	0.77692	0.50667	-0.0581	0
d453	0	0	0.023061	-0.028766	-0.043546	-0.311485	0.09322	0.033684	0.30565	0.026553	-0.048794	-0.031999	0.019476	0.006569	0.057854	0.038162	0.743812	0.995601	0.92182	0.973247	0.915752	1.0314	0.707209	0.945873	0.941009	8.15707	0.115046	0	0	0	0	0	0	0	0	0	0	0.302468	0	0	0	0	0	0	0	0.75185	0.48915	-0.04221	0
d454	0	0	0.073139	-0.669092	0.010665	-2.60482	0.025782	0.009895	0.82077	0.026445	0.00308	-0.112186	-0.047895	0.017384	0.017401	-0.014464	0.625974	1.06149	1.00942	1.03097	0.966987	1.04804	0.740223	0.976675	0.572123	14.0197	0.008872	0	0	0	0	0	0	0	6.68997	0	0.564126	0	0	0	0	0	0	0	0	0.79841	0.50523	-0.06123	0
d455	0	0	-0.131157	0.012268	-0.015115	1.24628	0.130805	0.040739	0.64049	-0.065976	-0.006937	0.149894	0.157529	0.167534	0.087537	-0.033492	0.798968	0.861029	0.909313	0.854987	0.928936	1.00942	0.45085	0.4871	0.540643	22.2336	0.108847	0	0	0	0.946309	0	0	0	5.68911	0	0.465539	0.222446	0.458258	0	0	0	0.488051	2.08106	9.92388	0.74889	0.47813	-0.03595	0
d456	0	0	-0.202009	-0.149957	0.018877	-0.12856	0.012491	0.079154	1.09148	-0.097361	0.009098	0.079308	0.113895	0.139919	0.008585	0.065291	0.805593	0.910528	0.905603	0.886325	0.992455	1.06189	0.581319	0.62609	0.606654	10.5967	0.085344	0	0	0	0	0	0	0	7.19346	0	0.638037	0.270394	0	0	0	0	0	1.78556	9.13507	0.79185	0.4994	-0.05986	0
d457	0	0	-0.392823	-0.177521	-0.089563	0.114282	-0.038687	0.046024	1.25443	-0.114314	-0.023199	0.045391	0.083486	0.129513	-0.025813	0.070561	0.735888	0.937782	0.927049	0.892168	1.00227	1.05395	0.556863	0.583676	0.570903	18.5521	0	0	0	0	0	0	0	0	6.9898	0	0.608659	0.284017	0	0	0	0	0	1.80317	9.30164	0.78633	0.50177	-0.05996	0
d458	0	0	-0.017986	0.118609	0.230633	-0.016296	-0.21948	0.087721	1.52099	-0.009349	0.097502	0.019634	0.073077	0.134792	-0.143218	-0.031047	0.784473	0.929213	0.995642	0.898602	1.11454	1.10085	0.638968	0.575941	0.647638	6.44965	0.124943	0	0	0	0	0	0	0	7.27764	0	0.639228	0.755441	0	0	0	0	0	1.77062	9.21784	0.8181	0.52954	-0.08521	0
d459	0	0	-0.391323	0.143484	-0.23684	1.97539	-0.038816	0.157962	1.20814	-0.275334	-0.161194	0.04574	0.026332	0.060426	-0.025294	0.073902	0.783146	0.929121	0.894049	0.916689	0.961743	0.98546	0.772462	0.786444	0.588043	5.44388	0.181481	0	0	0	0	0	0	0	1.34914	6.02728	0	0.24646	0	0	0	0	0	0	0	0.79677	0.50811	-0.06878	0
d460	0	0	-0.286058	0.040023	-0.192728	0.902427	0.001628	-0.128954	1.81241	-0.117296	-0.072253	0.063555	0.132548	0.174731	0.001016	0.019417	0.603338	0.916468	0.935824	0.837947	0.966942	0.938609	0.496461	0.527369	0.56689	12.3117	0.581647	0	0	0	0	0	0	0	6.86311	0	0.593649	0.273518	0	0	0	0	0	1.83042	9.36544	0.80063	0.52874	-0.08452	0
d461	0	0	-0.183558	0.070806	-0.204461	1.29552	0.029889	-0.089745	0.746314	-0.088765	-0.088618	0.093859	0.113264	0.120544	0.020486	-0.086114	0.837642	0.942792	1.03905	0.933741	1.03141	1.0638	0.507866	0.547969	0.607262	18.4323	0.506196	0	0	0	1.42659	0	0	0	5.97528	0	0.496461	0.253258	0.466644	0	0	0	0.4918	2.00548	9.76645	0.76191	0.48302	-0.04224	0
d462	0	0	-0.183558	0.070806	-0.204461	1.29552	0.029889	-0.089745	0.746314	-0.088765	-0.088618	0.093859	0.113264	0.120544	0.020486	-0.086114	0.837642	0.942792	1.03905	0.933741	1.03141	1.0638	0.507866	0.547969	0.607262	18.4323	0.506196	0	0	0	1.42659	0	0	0	5.97528	0	0.496461	0.253258	0.466644	0	0	0	0.4918	2.00548	9.76645	0.76191	0.48302	-0.04224	0
d463	0	0	-0.183558	0.070806	-0.204461	1.29552	0.029889	-0.089745	0.746314	-0.088765	-0.088618	0.093859	0.113264	0.120544	0.020486	-0.086114	0.837642	0.942792	1.03905	0.933741	1.03141	1.0638	0.507866	0.547969	0.607262	18.4323	0.506196	0	0	0	1.42659	0	0	0	5.97528	0	0.496461	0.253258	0.466644	0	0	0	0.4918	2.00548	9.76645	0.76191	0.48302	-0.04224	0
d464	0	0	-0.183558	0.070806	-0.204461	1.29552	0.029889	-0.089745	0.746314	-0.088765	-0.088618	0.093859	0.113264	0.120544	0.020486	-0.086114	0.837642	0.942792	1.03905	0.933741	1.03141	1.0638	0.507866	0.547969	0.607262	18.4323	0.506196	0	0	0	1.42659	0	0	0	5.97528	0	0.496461	0.253258	0.466644	0	0	0	0.4918	2.00548	9.76645	0.76191	0.48302	-0.04224	0
d465	0	0	-0.183558	0.070806	-0.204461	1.29552	0.029889	-0.089745	0.746314	-0.088765	-0.088618	0.093859	0.113264	0.120544	0.020486	-0.086114	0.837642	0.942792	1.03905	0.933741	1.03141	1.0638	0.507866	0.547969	0.607262	18.4323	0.506196	0	0	0	1.42659	0	0	0	5.97528	0	0.496461	0.253258	0.466644	0	0	0	0.4918	2.00548	9.76645	0.76191	0.48302	-0.04224	0
d466	0	0	-0.204148	0.094527	-0.036124	0.697994	-0.212835	0.073808	0.901603	-0.111695	-0.013968	-0.005947	0.012429	0.04774	-0.143003	0.056453	0.689623	0.974619	0.961431	0.965419	1.13594	1.0797	0.479839	0.478893	0.531486	14.168	0.098661	0	0	0	0	0	0	0	6.92075	0	0.601995	0.33553	0	0	0	0	0	1.8354	9.31724	0.75455	0.48382	-0.03813	0
d467	0	0	-0.172607	-0.01925	-0.067589	0.364214	-0.185731	-0.189054	1.49197	-0.118764	-0.048308	0.037555	0.074587	0.15736	-0.120678	0.124812	0.676052	0.945597	0.919236	0.853885	1.06523	1.05685	0.470734	0.501229	0.55002	6.56688	0.221754	0	0	0	0.950938	0	0	0	7.26606	0	0.651438	0.365737	0.417076	0.541354	0	0	0.533863	1.79216	9.04215	0.78387	0.51127	-0.06539	0
d468	0	0	0.097304	-0.509399	-0.143503	-0.81527	-0.263238	0.048135	1.69179	0.050525	-0.080476	0.006851	0.008481	0.097597	-0.165614	0.0592	0.596272	0.978278	0.950065	0.90287	1.11001	1.01008	0.809025	0.74272	0.574412	5.61397	0.17155	0	0	0	1.38851	0	0	0	7.06262	0	0.634353	0.38122	0.556013	0.47502	0	0	0.832496	0	0	0.8375	0.55294	-0.10749	0
d469	0	0	-0.177439	-0.040068	-0.167548	0.085783	-0.189116	0.057065	1.69612	-0.103745	-0.105085	-0.007634	0.042936	0.140616	-0.12721	-0.080277	0.677292	0.991338	0.937623	0.880629	1.08919	1.06357	0.481136	0.509626	0.442892	5.31975	0.098405	0	0	0	0.568134	0	0	0	7.33706	0	0.659137	0.386978	0.568134	0.419014	0	0	0.568134	1.74875	9.01729	0.81482	0.52787	-0.08387	0
d470	0	0	-0.251752	0.223481	-0.072437	2.24486	0.076662	-0.034864	0.942074	-0.098777	-0.022805	0.197346	0.188382	0.123912	0.050527	0.017791	1.16513	0.787716	0.833287	0.895648	0.995982	1.03818	0.537311	0.592384	0.665663	14.872	0.078363	0	0	0	0	0	0	0	6.9057	0	0.595112	0.274448	0	0	0	0	0	1.78834	9.39429	0.78966	0.5058	-0.06433	0
d471	0	0	0.039336	-0.028339	0.060535	-0.048157	0.091546	-0.008348	1.1088	0.027902	0.039989	0.015559	0.005663	0.040742	0.061829	0.040485	0.686733	0.974305	0.975068	0.95634	0.891491	1.02375	0.912285	0.469984	0.863162	5.93438	0.06958	0	0	0	0.781428	0	0	0	7.43212	0	0.689268	0	0.781428	0	0	0	0.781428	0	0	0.77527	0.48889	-0.04636	0
d472	0	0	0.041704	0.069314	0.161233	1.03292	0.078782	0.032378	1.06654	0.018814	0.065082	0.137446	0.139468	0.077021	0.054343	-0.019192	1.1072	0.836164	0.840782	0.949157	1.01033	1.03224	0.554459	0.615008	0.745531	10.6932	0.076229	0	0	0	0	0	0	0	6.63261	0	0.561473	0.26527	0	0	0	0	0	1.84913	9.56528	0.80074	0.50485	-0.06744	0
d473	0	0	-0.10594	0.037506	0.108418	0.660796	-0.0566	-0.051	?	-0.124988	0.107997	0.165149	0.090781	0.152946	-0.096831	0	0.809118	0.614857	0.839816	0.642957	0.933949	0.91542	0	0	0	11.1466	0.262668	0	0	0	0	0	0	0	0	0	0	0	0	0	0	0	0	0	0	0.74475	0.57283	-0.1261	0
d474	0	0	-0.388547	-0.303252	-0.07232	-0.285349	0.113667	0.106837	1.03635	-0.090907	-0.014597	0.131218	0.183319	0.199369	0.076126	-0.042601	0.749475	0.865216	0.88354	0.83725	0.937152	0.987055	0.581319	0.623974	0.583524	25.6739	0	0	0	0	0	0	0	0	6.09244	0	0.499103	0.28841	0	0	0	0	0	1.92052	9.88554	0.788	0.50165	-0.05981	0
d475	0	0	-0.124807	0.035828	-0.034628	0.552145	0.070157	-0.113975	1.21622	-0.071971	-0.017299	0.063998	0.099849	0.075469	0.043349	0.067206	0.673926	0.906799	0.852169	0.93029	0.95419	1.01436	0.460132	0.511531	0.552006	9.08275	0.132505	0	0	0	0	0	0	0	7.18427	0	0.634848	0.271958	0	0.670289	0	0	0	1.80057	9.17054	0.7873	0.51773	-0.0729	0
d476	0	0	-0.244334	0.007178	-0.273601	1.3351	-0.00053	0.009897	1.27726	-0.086652	-0.080483	0.101793	0.103951	0.153612	-0.000338	0.007558	0.606651	0.894151	0.926837	0.862121	0.967985	0.925153	0.454113	0.490779	0.50762	20.2307	0	0	0	0	0	0	0	0	6.85585	0	0.595934	0.251879	0	0.47965	0	0	0	1.8579	9.32779	0.77928	0.50741	-0.06372	0
d477	0	0	0.023099	-0.051144	-0.013899	-0.694864	-0.068343	-0.062923	1.04615	0.015274	-0.009738	0.012874	0.059695	0.04524	-0.043714	0.087459	0.691555	0.951353	0.866472	0.947749	1.02257	1.03156	0.517804	0.78472	0.717896	8.06641	0.138221	0	0	0	0.983046	0	0	0	7.10072	0	0.629861	0.380403	0.423946	0.53321	0	0	0.5591	0	0	0.78108	0.5119	-0.06241	0
d478	0	0	-0.221452	-0.120636	-0.393043	1.02285	0.092807	0.034004	0.968982	-0.056912	-0.076388	0.130062	0.138977	0.147841	0.062582	-0.025656	0.665269	0.867969	0.878599	0.88828	0.957328	0.968259	0.492271	0.531144	0.524217	26.2595	0	0	0	0	0	0	0	0	6.39788	0	0.537896	0.266082	0	0	0	0	0	1.90187	9.63981	0.77415	0.49361	-0.05158	0
d479	0	0	0.187533	0.17835	0.563042	3.29682	0.141965	-0.030212	0.898803	0.037398	0.089602	0.208512	0.231157	0.214659	0.093059	-0.07193	0.910195	0.828814	0.920977	0.829508	0.978809	1.02549	0.515338	0.507434	0.551636	29.3307	0	0	0	0	0	0	0	0	5.75813	0	0.464838	0.270411	0	0.78833	0	0	0	2.00042	10.0418	0.78421	0.50597	-0.06257	0
d480	0	0	-0.242914	0.060056	-0.203993	1.4586	-0.056506	-0.197091	1.39962	-0.093227	-0.060371	0.027271	0.037505	0.073494	-0.036317	0.009886	0.538977	0.960551	0.977115	0.902008	0.980588	0.896113	0.461319	0.48814	0.496178	17.6499	0	0	0	0	0	0	0	0	6.88387	0	0.600114	0.276016	0	0	0	0	0	1.85408	9.30096	0.77923	0.51062	-0.06611	0
d481	0	0	-0.039238	-0.472792	0.029442	-1.15576	0.251567	0.054239	0.6493	-0.012138	0.00811	0.12728	0.126989	0.122625	0.176647	-0.000281	0.720313	0.855686	0.854189	0.892995	0.833226	1.11697	0.820553	0.882389	0.838289	19.6849	0.00725	0	0	0	0	0	0	0	6.41183	0	0.533039	0.324425	0	0.565859	0	0	0	0	0	0.77848	0.48806	-0.04636	0
d482	0	0	0.065274	-0.143282	-0.318313	0.179542	0.055804	-0.110529	1.09759	0.024615	-0.107308	0.015756	0.024631	0.028827	0.03879	0.032625	1.01225	0.964543	0.971316	0.988163	0.955557	0.905512	0.577441	0.771674	0.672755	13.7674	0.361185	0	0	0	0	0	0	0	7.08885	0	0.621731	0.288477	0	0.717801	0	0	0	1.75952	9.22988	0.77778	0.49419	-0.05182	0
d483	0	0	-0.099208	-0.353965	-0.194638	-0.585065	0.093184	0.058759	1.08664	-0.038221	-0.074648	0.069236	0.078853	0.10193	0.065917	0.164701	0.785736	0.90944	0.910899	0.917787	0.933388	1.04611	0.628269	0.668559	0.498447	11.8567	0.237158	0	0	0	0	0	0	0	7.58443	0	0.678123	0.276459	0	0	0	0	0	1.65155	9.04414	0.808	0.5082	-0.06735	0
d484	0	0	-0.069386	-0.011806	-0.156488	-0.173843	0.004114	0.053225	1.64962	-0.046143	-0.101987	0.149502	0.247699	0.241653	0.002433	0.025196	0.583655	0.800394	0.776769	0.818716	1.00622	0.991325	0.606913	0.661347	0.570622	5.87364	0.065224	0	0	0	0	0	0	0	7.67596	0	0.697746	0	0	0	0	0	0	1.66037	8.90197	0.80968	0.53582	-0.09329	0
d485	0	0	-0.069386	-0.011806	-0.156488	-0.173843	0.004114	0.053225	1.64962	-0.046143	-0.101987	0.149502	0.247699	0.241653	0.002433	0.025196	0.583655	0.800394	0.776769	0.818716	1.00622	0.991325	0.606913	0.661347	0.570622	6.41605	0.065224	0	0	0	0	0	0	0	7.67596	0	0.697746	0	0	0	0	0	0	1.66037	8.90197	0.80968	0.53582	-0.09329	0
d486	0	0	-0.503226	0.092457	-0.244206	0.778985	-0.301432	0.09373	2.56591	-0.161014	-0.070576	-0.082614	-0.00442	0.118966	-0.186747	0.098231	0.615278	1.05437	1.03878	0.881844	1.119	1.11176	0.570918	0.573973	0.597915	10.2956	0	0	0	0	0	0	0	0	7.15947	0	0.630609	0	0	0	0	0	0	1.75735	9.19056	0.82727	0.55217	-0.11024	0
d487	0	0	-0.132405	-0.110709	-0.23279	-0.853895	-0.279372	-0.009664	2.06484	-0.068837	-0.111146	-0.067752	-0.006125	0.115717	-0.166397	0.096044	0.506063	1.04522	1.04809	0.85875	1.04579	1.01435	0.509592	0.729374	0.62996	9.33439	0	0	0	0	0	0	0	0	6.91213	0	0.601653	0	0	0	0	0	0	1.93188	9.08949	0.79242	0.53298	-0.09104	0
d488	0	0	-0.003566	0.271687	0.471945	3.29682	0.141965	-0.030212	0.898803	-0.000802	0.084744	0.208512	0.231157	0.214659	0.093059	-0.07193	0.819908	0.828814	0.920977	0.829508	0.978809	1.02549	0.515338	0.507434	0.551636	27.3163	0	0	0	0	2.91778	0	0	0	5.75813	0	0.464838	0.270411	0.430029	0.78833	0	0	0.526715	2.00042	10.0418	0.78421	0.50597	-0.06257	0
d489	0	0	-0.225057	-0.124562	-0.172479	0.358499	0.07085	0.043892	1.21155	-0.061689	-0.040226	0.131738	0.161915	0.149615	0.045143	-0.023792	0.764939	0.844635	0.871113	0.902566	0.975425	1.05498	0.547732	0.60238	0.591318	20.1269	0.023587	0	0	0	0	0	0	0	6.6328	0	0.56461	0.280253	0	0	0	0	0	1.86997	9.51902	0.79558	0.51424	-0.07175	0
d490	0	0	-0.186074	0.073441	0.08099	0.496345	-0.049909	-0.12224	1.14665	-0.114443	0.044026	0.093177	0.140879	0.153859	-0.031776	-0.038096	0.826363	0.884757	0.877809	0.861487	1.02755	1.07398	0.51152	0.52871	0.559799	10.8333	0.066836	0	0	0	0	0	0	0	6.88201	0	0.597748	0.2791	0	0	0	0	0	1.87195	9.33579	0.77597	0.50065	-0.05612	0
d491	0	0	-0.180725	-0.230152	0.145708	-0.14278	0.139692	0.010246	0.765218	-0.063716	0.047266	0.15228	0.185026	0.182461	0.094409	-0.0579	0.89834	0.854427	0.896242	0.858738	0.944776	1.07227	0.607514	0.643707	0.624952	20.5002	0.289119	0	0	0	0.532265	0	0	0	6.31443	0	0.526247	0.275276	0.532265	0	0	0	0.532265	1.94822	9.72844	0.77991	0.49463	-0.05219	0
d492	0	0	-0.084589	0.014971	-0.204036	0.5411	0.036968	-0.162258	0.787955	-0.034655	-0.06894	0.099826	0.120721	0.137275	0.024743	-0.072981	0.588576	0.938584	1.05364	0.917735	1.02674	1.10013	0.516759	0.54129	0.59609	16.5839	0.585381	0	0	0	1.97825	0	0	0	5.91033	0	0.488605	0.271392	0.473651	0	0	0	0.506055	2.01433	9.81526	0.77475	0.49342	-0.05148	0
d493	0	0	-0.116401	-0.005123	-0.111065	0.080105	-0.272446	-0.198879	1.40829	-0.087442	-0.092294	-0.152269	-0.084141	0.004835	-0.171361	-0.026146	0.623232	1.07305	1.10271	0.965548	1.09156	0.960152	0.52673	0.579806	0.609691	9.21396	0.387667	0	0	0	0	0	0	0	7.24877	0	0.648057	0.396204	0	0	0	0	0	1.80968	9.06995	0.78469	0.51606	-0.06953	0
d494	0	0	-0.233007	0.042128	-0.248251	1.38534	-0.004147	-0.280025	0.873375	-0.139541	-0.136533	0.143428	0.185983	0.150978	-0.002756	-0.018149	0.868446	0.866047	0.856344	0.85046	1.04943	1.04935	0.517202	0.489531	0.514174	14.3903	0.096802	0	0	0	0	0	0	0	6.53044	0	0.559083	0.248111	0	0	0	0	0	1.91744	9.47482	0.75803	0.48737	-0.04337	0
d495	0	0	-0.150734	-0.049728	-0.07572	0.742372	0.129934	-0.046223	0.655666	-0.054179	-0.020202	0.145862	0.148268	0.122714	0.092113	0.024384	0.874288	0.86413	0.86815	0.925228	0.972407	1.01632	0.522185	0.555991	0.536317	21.0513	0.078956	0	0	0	0	0	0	0	6.33608	0	0.530439	0.258372	0	0	0	0	0	1.91221	9.68114	0.75812	0.47778	-0.03596	0
d496	0	0	-0.212246	-0.073746	-0.038661	-0.269597	0.025004	-0.009564	0.948301	-0.092512	-0.014052	0.049286	0.086454	0.126755	0.016561	-0.025736	0.669658	0.921575	0.923655	0.910933	0.987659	1.09291	0.596472	0.630099	0.626803	15.1211	0.27488	0	0	0	0	0	0	0	7.02105	0	0.615372	0.315921	0	0	0	0	0	1.83097	9.24859	0.78421	0.5	-0.0566	0
d497	0	0	-0.317222	0.110998	-0.246782	1.30153	-0.095632	-0.346471	2.5259	-0.155246	-0.120773	0.135457	0.157104	0.201732	-0.058678	-0.023745	0.666181	0.890746	0.971657	0.812088	1.05818	1.07915	0.510097	0.546518	0.616324	6.34852	0.032647	0	0	0	0.473162	0	0	0	7.14075	0	0.635222	0.269493	0.473162	0	0	0	0.473162	1.78914	9.10878	0.83333	0.55571	-0.11709	0
d498	0	0	0.070436	-0.388634	-0.165882	-0.620591	-0.18448	0.094113	1.74951	0.048427	-0.104384	0.049225	0.015076	0.107841	-0.114667	0.122812	0.648839	0.921201	0.972649	0.900247	1.04372	1.03755	0.94147	0.830935	0.659204	5.78658	0.033599	0	0	0	0.837824	0	0	0	7.18514	0	0.64974	0	0.837824	0	0	0	0.837824	0	0	0.8172	0.53237	-0.08984	0
d499	0	0	-0.185649	0.068943	-0.131901	0.374289	-0.102466	0.109721	1.10836	-0.124203	-0.071856	0.076346	0.131133	0.181722	-0.068812	0.001789	0.700908	0.831411	0.845315	0.784492	0.992669	1.12441	0.558018	0.599074	0.63687	11.7118	0.035925	0	0	0	0	0	0	0	7.14757	0	0.630727	0	0	0	0	0	0	3.67888	9.18505	0.76144	0.49449	-0.04773	0
d500	0	0	-0.231764	0.056285	-0.10732	1.84801	-0.125032	-0.304679	0.84564	-0.134665	-0.054734	0.387936	0.322017	0.373182	-0.080683	0.026782	0.592604	0.638738	0.721285	0.633956	1.06962	0.914731	0.5781	0.390528	0.613263	16.1958	0.012838	0	0	0	0.929727	0	0	0	6.45846	0	0.550569	0.279822	0.461783	0.656701	0	0	0.467944	1.93379	9.51731	0.76011	0.49093	-0.04655	0
d501	0	0	-0.185059	0.015098	0.178772	0.536168	-0.325055	-0.113212	0.933076	-0.105769	0.08914	-0.08537	-0.056193	-0.045797	-0.223072	-0.102459	0.926695	1.07005	1.11558	1.04068	1.21513	0.986427	0.490413	0.480754	0.560296	12.825	0.155329	0	0	0	1.21181	0	0	0	6.34535	0	0.532613	0.451186	0.603532	0.314952	0	0	0.608276	1.94444	9.65952	0.74727	0.48496	-0.0353	0
d502	0	0	-0.137841	0.046408	-0.010307	0.291273	-0.055898	-0.161432	1.38885	-0.085403	-0.006386	0.006377	0.064229	0.054527	-0.033519	0.062274	0.690473	0.936248	0.881408	0.941703	1.02544	1.03995	0.493771	0.555586	0.618135	7.66645	0.284679	0	0	0	0	0	0	0	7.25924	0	0.644452	0.311969	0	0	0	0	0	1.7905	9.12784	0.79649	0.53008	-0.08393	0
d503	0	0	-0.070787	-0.009549	-0.19234	0.044926	-0.042517	-0.106214	1.47455	-0.051513	-0.170587	-0.104246	-0.070429	0.023585	-0.026807	-0.047432	0.681543	1.05978	1.17349	0.990062	0.993006	0.979502	0.551148	0.610946	0.677055	9.45346	0.523435	0	0	0	0	0	0	0	7.23789	0	0.646281	0	0	0	0	0	0	1.81649	9.08208	0.78947	0.52683	-0.07781	0
d504	0	0	-0.221777	0.367999	0.078443	1.34298	0.231155	0.265889	1.83899	-0.099366	0.029753	0.022731	-0.008216	-0.02913	0.160236	0.015591	0.795319	0.985884	1.00599	1.00099	0.838619	1.28492	0.495816	0.503925	0.60667	4.40321	0.247416	0	0	0	0	0	0	0	7.62666	0	0.702545	0.39081	0	0	0	0	0	1.6138	8.78138	0.81717	0.52456	-0.08263	0
d505	0	0	-0.183795	0.06261	-0.036993	1.34306	0.154945	-0.174935	0.88611	-0.094945	-0.01307	0.180251	0.178546	0.134036	0.099789	0.011438	0.637482	0.8068	0.801367	0.869155	0.896897	0.945009	0.551398	0.521734	0.548943	15.5908	0.153781	0	0	0	0	0	0	0	6.88458	0	0.594363	0.411086	0	0	0	0	0	1.84163	9.38608	0.76051	0.49564	-0.04875	0
d506	0	0	-0.117907	0.061834	-0.110279	1.38837	0.085682	-0.200678	0.681634	-0.070737	-0.059644	0.168534	0.167912	0.179195	0.056929	-0.025327	0.699527	0.867354	0.988296	0.866164	1.003	1.04458	0.476382	0.520863	0.574146	18.6438	0.071582	0	0	0	2.09931	0	0	0	6.46321	0	0.552151	0.237681	0.378481	0	0	0	0.446296	1.93194	9.4983	0.75274	0.48056	-0.04024	0
d507	0	0	0.041511	-0.154727	0.017054	-1.28059	0.086645	0.009067	1.73021	0.079462	0.047843	-0.221526	-0.187738	-0.121099	0.055275	-0.080547	0.35117	1.17761	1.15926	1.1536	0.842457	0.77968	0.497404	1.04214	0.800575	5.14018	0.089787	1	0	0	0	0	0	0	0	0	0	0.356395	0	0	0	0	0	0	0	0.84242	0.52949	-0.09199	0
d508	0	0	-0.162871	-0.149631	-0.110373	-0.03265	0.054021	-0.03617	1.5864	-0.109022	-0.066368	0.009156	0.041879	0.123767	0.03617	0.157151	0.518291	0.929928	0.906659	0.894294	0.905771	1.06817	0.613448	0.601364	0.449295	6.79306	0.043651	0	0	0	0	0	0	0	7.69687	0	0.699091	0	0	0	0	0	0	1.6461	8.90661	0.8	0.51233	-0.0698	0
d509	0	0	-0.310767	-0.005372	-0.10153	0.087418	0.114579	-0.043247	1.27838	-0.120416	-0.031664	0.087885	0.08439	0.087289	0.079172	-0.052226	0.689226	0.900541	0.899816	0.918397	0.927363	1.10632	0.681502	0.731942	1.05781	11.1725	0.138914	0	0	0	0	0	0	0	6.84243	0	0.588349	0.452902	0	0	0	0	0	1.79291	9.41341	0.79497	0.50179	-0.0614	0
d510	0	0	-0.186288	-0.156475	-0.027352	-0.182692	0.011125	0.044207	1.03072	-0.088283	-0.012904	0.084705	0.119296	0.149512	0.007466	-0.032124	0.803296	0.903397	0.915049	0.87664	0.978073	1.02445	0.587118	0.638382	0.613932	13.3683	0.237158	0	0	0	0	0	0	0	7.14152	0	0.632055	0.270312	0	0	0	0	0	1.81018	9.15856	0.788	0.5	-0.05916	0
d511	0	0	0.000712	-0.007098	0.361623	-0.666049	-0.165221	0.290118	0.977866	0.000282	0.114977	-0.024261	0.032971	0.130252	-0.108885	0.01773	0.787358	0.944309	0.94547	0.8934	1.04044	1.16024	0.603508	0.543194	0.606695	13.4542	0.331719	0	0	0	0	0	0	0	6.90879	0	0.588085	0.782807	0	0	0	0	0	1.82156	9.51024	0.78087	0.50513	-0.05544	0
d512	0	0	0.0558	-0.225788	0.078088	-0.498701	0.023309	0.011146	0.705059	0.024074	0.031869	0.080662	0.077001	0.094484	0.016484	-0.035579	0.808679	0.946827	1.0475	0.953594	1.01487	1.06075	0.853415	0.574543	0.801625	15.1932	0.100444	0	0	0	1.27645	0	0	0	6.88624	0	0.61294	0.268974	0.489594	0	0	0	0.786859	0	0	0.77654	0.48513	-0.04487	0
d513	0	0	-0.352618	-0.028764	-0.115307	0.419672	-0.118071	0.109324	1.85208	-0.133431	-0.041629	0.03721	0.082113	0.14383	-0.076151	0.078141	0.686497	0.94537	0.948322	0.872282	1.04262	1.07291	0.54411	0.569089	0.581761	11.2181	0	0	0	0	0	0	0	0	7.17661	0	0.634323	0.278383	0	0	0	0	0	1.77146	9.16281	0.81133	0.52625	-0.08541	0
d514	0	0	-0.186288	-0.156475	-0.027352	-0.182692	0.011125	0.044207	1.03072	-0.088283	-0.012904	0.084705	0.119296	0.149512	0.007466	-0.032124	0.803296	0.903397	0.915049	0.87664	0.978073	1.02445	0.587118	0.638382	0.613932	13.3683	0.237158	0	0	0	0	0	0	0	7.14152	0	0.632055	0.270312	0	0	0	0	0	1.81018	9.15856	0.788	0.5	-0.05916	0
d515	0	0	-0.075883	0.063405	-0.068516	0.268075	0.038832	-0.174531	0.918688	-0.038341	-0.028248	-0.010395	0.011462	0.006184	0.025283	-0.027282	0.955958	0.933866	0.954274	1.04187	0.997419	0.933481	0.553082	0.642073	0.664863	14.8811	0.164088	0	0	0	0.921975	0	0	0	6.92999	0	0.60023	0.369876	0.460987	0	0	0	0.460987	1.83827	9.35589	0.75914	0.49234	-0.04646	0
d516	0	0	-0.220254	-0.244944	-0.189926	0.777926	0.013298	-0.014445	0.683541	-0.104559	-0.076637	0.14648	0.14834	0.179397	0.008829	0.009076	0.764833	0.851144	0.833707	0.823179	0.945056	1.12512	0.609813	0.530355	0.558348	22.8724	0.187833	0	0	0	0	0	0	0	6.86785	0	0.595964	0.380413	0	0	0	0	0	1.85432	9.34247	0.74739	0.47939	-0.03313	0
d517	0	0	-0.253669	0.232935	-0.170204	1.41366	-0.037503	-0.045832	1.29399	-0.183588	-0.105189	0.22032	0.192459	0.180638	-0.025634	0.001328	0.731532	0.792796	0.802196	0.806408	1.01538	1.15643	0.553776	0.389133	1.1647	8.08375	0.062797	0	0	0	1.08374	0	0	0	6.76868	0	0.589241	0.397788	0.513805	0	0	0	0.569933	1.85384	9.30858	0.76667	0.48774	-0.04633	0
d518	0	0	0.098956	-0.392969	-0.123341	-1.12123	-0.010338	-0.15282	1.26759	0.055809	-0.056884	0.047916	0.032947	0.094014	-0.006414	0.083841	0.678741	0.903144	0.933936	0.969129	0.992842	0.943181	0.922968	0.854712	0.693352	9.38356	0.031237	0	0	0	0.851542	0	0	0	7.02671	0	0.625401	0	0.851542	0	0	0	0.851542	0	0	0.79638	0.51541	-0.07166	0
d519	0	0	-0.257581	-0.070575	-0.119664	0.496997	0.110908	-0.051482	1.16581	-0.160989	-0.061357	0.02087	0.034341	0.064565	0.074699	-0.086183	0.875736	0.957684	0.944131	0.960317	0.921608	1.04827	0.51184	0.523552	0.467125	9.15814	0.112216	0	0	0	0	0	0	0	7.04895	0	0.618221	0.286009	0	0	0	0	0	1.78487	9.23462	0.77009	0.48707	-0.04653	0
d520	0	0	-0.31548	0.030231	-0.281171	-0.291479	-0.224913	-0.003766	2.7019	-0.111099	-0.090187	-0.083167	0.004262	0.106568	-0.141995	0.09681	0.524192	1.05226	1.01945	0.901113	1.08242	1.07103	0.58656	0.676802	0.645483	8.45643	0	0	0	0	0	0	0	0	6.91345	0	0.601466	0	0	0	0	0	0	1.73582	9.1014	0.83768	0.55498	-0.11344	0
d521	0	0	-0.149604	0.008676	-0.132394	0.279944	-0.178065	-0.172845	1.08692	-0.096867	-0.0664	-0.110362	-0.066884	-0.026787	-0.118017	0.015713	0.621848	1.05062	1.02618	1.00272	1.06555	0.962414	0.498238	0.508642	0.527953	11.8032	0.027113	0	0	0	0	0	0	0	7.06896	0	0.623391	0.39219	0	0	0	0	0	1.82556	9.19303	0.76099	0.49174	-0.046	0
d522	0	0	-0.149604	0.008676	-0.132394	0.279944	-0.178065	-0.172845	1.08692	-0.096867	-0.0664	-0.110362	-0.066884	-0.026787	-0.118017	0.015713	0.621848	1.05062	1.02618	1.00272	1.06555	0.962414	0.498238	0.508642	0.527953	11.2607	0.027113	0	0	0	0	0	0	0	7.06896	0	0.623391	0.39219	0	0	0	0	0	1.82556	9.19303	0.76099	0.49174	-0.046	0
d523	0	0	-0.132101	0.052247	-0.154294	1.10195	0.156964	-0.358817	1.01924	-0.073605	-0.058132	0.183774	0.154561	0.146687	0.101093	-0.033823	0.897289	0.809072	0.847662	0.866995	0.899044	0.904647	0.582406	0.497337	0.641143	13.9599	0.02249	0	0	0	0	0	0	0	7.02506	0	0.617563	0.40707	0	0	0	0	0	1.84105	9.22405	0.77716	0.5045	-0.05855	0
d524	0	0	-0.123008	0.008738	-0.08621	0.252044	-0.195102	-0.046078	0.691233	-0.058436	-0.033418	-0.140599	-0.108052	-0.0725	-0.132872	-0.005442	0.704664	1.09365	1.06138	1.05785	1.10364	1.02485	0.485376	0.541952	0.584476	20.7617	0.051125	0	0	0	0	0	0	0	6.80737	0	0.587627	0.354264	0	0	0	0	0	1.86058	9.39083	0.74033	0.47657	-0.02862	0
d525	0	0	-0.173507	0.037956	-0.19492	0.591492	-0.094837	-0.158121	1.65558	-0.108063	-0.122266	0.04615	0.067287	0.087696	-0.060445	0.137491	0.746808	0.932641	0.908793	0.913706	1.03393	1.00933	0.474713	0.594269	0.658964	6.88052	0.317945	0	0	0	0	0	0	0	7.34561	0	0.659173	0.270226	0	0	0	0	0	2.33889	9.86608	0.78571	0.5125	-0.07109	0
d526	0	0	0.047516	-0.029448	-0.044203	-0.360837	0.076877	-0.043908	0.312926	0.053586	-0.047277	-0.010801	0.028634	0.02899	0.046503	0.016796	0.736283	0.980357	0.969828	0.963104	0.936775	1.04002	0.760411	0.957266	0.894622	8.20686	0.124491	0	0	0	0	0	0	0	0	0	0	0.300153	0	0	0	0	0	0	0	0.75766	0.49464	-0.0481	0
d527	0	0	-0.382748	0.055622	-0.137255	0.910858	-0.083314	0.018265	1.51707	-0.143161	-0.040044	-0.110031	-0.05602	0.007158	-0.054029	0.080996	0.556554	1.08386	1.06147	0.974661	0.995621	0.926545	0.516457	0.524863	0.497602	11.6966	0	0	0	0	0	0	0	0	6.93227	0	0.602355	0.388286	0	0	0	0	0	1.80509	9.32088	0.78667	0.50563	-0.06446	0
d528	0	0	-0.295394	0.125557	-0.083536	1.4679	0.117473	-0.119729	1.4721	-0.123521	-0.029328	0.240504	0.211536	0.28279	0.068713	0.01637	0.826987	0.768441	0.964132	0.756092	1.02636	1.0553	0.495144	0.566354	0.587894	16.6703	0	0	0	0	0	0	0	0	6.41403	0	0.54421	0.254862	0	0	0	0	0	1.9384	9.56179	0.80707	0.53568	-0.09526	0
d529	0	0	-0.038638	-0.126325	-0.033037	-0.350147	0.053029	-0.041175	1.13081	-0.027965	-0.024887	-0.019733	-0.022038	-0.009648	0.0381	0.046644	0.722704	1.02203	0.975886	1.01363	0.9344	0.956672	0.627931	0.642919	0.605271	10.9001	0.074103	1	0	0	0	0	0	0	0	0	0	0.214004	0	0	0	0	0	0	0	0.77829	0.47884	-0.04124	0
d530	0	0	-0.138605	-0.147142	-0.05375	-0.931302	0.047688	-0.046649	1.36978	-0.055175	-0.01739	-0.034174	0.006766	0.039309	0.032598	-0.097157	0.651743	1.00708	0.972624	0.980772	0.963664	1.03986	0.575489	0.842886	0.562946	10.0038	0.16839	0	0	0	0	0	0	0	6.90018	0	0.595151	0.4595	0	0	0	0	0	1.78708	9.38432	0.80067	0.50689	-0.06604	0
d531	0	0	-0.214123	0.0773	0.017737	0.739373	-0.038701	0.005824	?	-0.24109	0.011587	0.153973	0.098415	0.151447	-0.092057	0	0.498077	0.532616	0.550292	0.702015	0.941969	0.866695	0	0	0	7.34588	0	0	0	0	0	0	0	0	0	0	0	0	0	0	0	0	0	0	0	0.73421	0.54265	-0.09363	0
d532	0	0	-0.214123	0.0773	0.017737	0.739373	-0.038701	0.005824	?	-0.24109	0.011587	0.153973	0.098415	0.151447	-0.092057	0	0.498077	0.532616	0.550292	0.702015	0.941969	0.866695	0	0	0	7.34588	0	0	0	0	0	0	0	0	0	0	0	0	0	0	0	0	0	0	0	0.73421	0.54265	-0.09363	0
d533	0	0	-0.268445	-0.126005	-0.205425	0.853123	0.095163	-0.101537	1.01945	-0.068845	-0.043139	0.123787	0.13292	0.131254	0.063341	-0.074394	0.807705	0.878141	0.944011	0.930407	0.982101	1.04622	0.509395	0.570725	0.594453	24.2024	0.038038	0	0	0	1.06677	0	0	0	5.90772	0	0.48439	0.283884	0.533168	0	0	0	0.533602	1.97789	9.88663	0.78156	0.49941	-0.05806	0
d534	0	0	-0.051865	-0.004658	-0.522603	1.40188	-0.00789	-0.067633	1.3219	-0.010416	-0.082732	0.070382	0.087678	0.112995	-0.005271	-0.039275	0.890837	0.914073	0.948302	0.912198	1.0122	1.04694	0.635858	0.585156	0.653782	15.7597	0	0	0	0	3.6684	0	0	0	6.90674	0	0.589405	0.424872	0.833621	-0.722311	0	0	1.00058	1.75656	9.47741	0.81951	0.5266	-0.08274	0
d535	0	0	0.12951	-0.455628	-0.113573	-0.493481	-0.280524	-0.144601	1.20663	0.075856	-0.065471	-0.082644	-0.051106	-0.026852	-0.180279	-0.02869	0.673484	1.0419	1.00296	0.991639	1.12115	0.924098	0.842739	0.715459	0.6271	10.8226	0.372562	0	0	0	0.83371	0	0	0	6.90007	0	0.611403	0.450026	0.83371	0	0	0	0.83371	0	0	0.78333	0.51577	-0.06652	0
d536	0	0	-0.21261	-0.081031	0.065632	0.63469	-0.135756	-0.1217	1.17321	-0.106586	0.031678	-0.089099	-0.040747	-0.026748	-0.086995	0.028034	0.773089	1.03975	0.959013	0.993061	1.06024	0.977323	0.550354	0.519009	0.459913	9.92915	0.31336	0	0	0	0	0	0	0	7.45023	0	0.658536	0.464722	0	0	0	0	0	1.69219	9.15162	0.78503	0.51804	-0.06842	0
d537	0	0	-0.156889	0.028771	0.034693	0.424445	-0.218325	-0.144191	1.14878	-0.089639	0.019084	-0.077646	-0.019626	-0.025564	-0.137481	0.043287	0.772204	1.02762	0.9435	0.987563	1.11115	0.968513	0.50642	0.523047	0.588809	9.92915	0.31336	0	0	0	0	0	0	0	7.13906	0	0.626643	0.460237	0	0	0	0	0	1.80627	9.23084	0.77483	0.51346	-0.06384	0
d538	0	0	-0.030558	-0.123289	-0.070073	-0.179888	0.102153	0.031182	0.5584	-0.011004	-0.019335	0.140212	0.148765	0.110081	0.070794	0.054838	0.859297	0.853158	0.829754	0.92417	0.970717	1.01509	0.57055	0.762579	0.652791	22.8241	0.394063	0	0	0	0	0	0	0	6.40208	0	0.539668	0.263802	0	0.519027	0	0	0	0	0	0.76016	0.48317	-0.03804	0
d539	0	0	-0.199603	0.082718	-0.158069	0.422092	-0.082064	-0.090561	1.09353	-0.121931	-0.076077	0.012348	0.040262	0.111661	-0.052787	-0.001618	0.670356	0.933875	0.948	0.912701	1.02562	1.05653	0.519837	0.535115	0.579835	12.2625	0.016893	0	0	0	0	0	0	0	7.1112	0	0.627746	0.333276	0	0	0	0	0	1.82166	9.18344	0.7695	0.49702	-0.05129	0
d540	0	0	-0.199603	0.082718	-0.158069	0.422092	-0.082064	-0.090561	1.09353	-0.121931	-0.076077	0.012348	0.040262	0.111661	-0.052787	-0.001618	0.670356	0.933875	0.948	0.912701	1.02562	1.05653	0.519837	0.535115	0.579835	12.2625	0.016893	0	0	0	0	0	0	0	7.1112	0	0.627746	0.333276	0	0	0	0	0	1.82166	9.18344	0.7695	0.49702	-0.05129	0
d541	0	0	-0.349199	0.122069	-0.117071	1.78631	-0.068958	-0.1189	1.16179	-0.241406	-0.084787	-0.00645	-0.009687	0.048044	-0.044241	0.021268	0.748708	0.974536	0.925954	0.927334	0.970775	0.979367	0.771794	0.785181	0.611384	6.17858	0.165838	0	0	0	0	0	0	0	1.35605	6.0773	0	0.266472	0	0	0	0	0	0	0	0.78571	0.50732	-0.06299	0
d542	0	0	-0.106826	-0.003514	-0.166764	0.976721	0.033402	-0.142389	0.708324	-0.059568	-0.080779	0.105502	0.119182	0.131702	0.022418	-0.071869	0.698805	0.929583	1.04761	0.919979	1.0258	1.06889	0.471723	0.522087	0.585977	18.8912	0.585381	0	0	0	1.85979	0	0	0	5.84398	0	0.482645	0.262611	0.453304	0	0	0	0.488413	2.02768	9.82718	0.75152	0.47952	-0.03758	0
d543	0	0	-0.017625	-0.217082	-0.218055	-0.157638	-0.224076	-0.07164	2.06264	-0.008283	-0.125142	-0.089798	-0.003151	0.002245	-0.130045	-0.089431	0.815291	1.0339	0.97053	0.975136	1.07402	0.817432	0.881203	0.892029	0.869071	5.47435	0.130742	0	0	0	0.839338	0	0	0	7.11066	0	0.638825	0.385423	0.839338	0	0	0	0.839338	0	0	0.86053	0.584	-0.1406	0
d544	0	0	-0.264167	0.190093	-0.12768	0.483516	-0.081298	-0.195121	1.9515	-0.145884	-0.061696	0.023334	0.022802	0.116257	-0.053297	0.067409	0.653038	0.922093	0.978191	0.902482	0.993882	1.03861	0.609468	0.768762	0.836216	6.14242	0.008998	0	0	0	0	0	0	0	7.43562	0	0.667046	0	0	0	0	0	0	1.70391	9.02096	0.81482	0.52881	-0.08481	0
d545	0	0	-0.264167	0.190093	-0.12768	0.483516	-0.081298	-0.195121	1.9515	-0.145884	-0.061696	0.023334	0.022802	0.116257	-0.053297	0.067409	0.653038	0.922093	0.978191	0.902482	0.993882	1.03861	0.609468	0.768762	0.836216	6.14242	0.008998	0	0	0	0	0	0	0	7.43562	0	0.667046	0	0	0	0	0	0	1.70391	9.02096	0.81482	0.52881	-0.08481	0
d546	0	0	-0.167405	0.007489	0.079069	0.866906	0.023886	0.057885	0.76598	-0.08575	0.035214	0.131545	0.141396	0.17359	0.016059	0.018021	0.742893	0.86089	0.851042	0.835235	0.971104	1.02129	0.45854	0.499458	0.539619	16.8916	0.338716	0	0	0	1.02666	0	0	0	6.69886	0	0.578005	0.231261	0.466376	0.541689	0	0	0.560282	1.90379	9.40225	0.74748	0.4823	-0.03564	0
d547	0	0	-0.124775	-0.002326	0.151246	0.554193	-0.010209	-0.012508	1.11961	-0.083821	0.08786	0.101157	0.115386	0.16742	-0.006571	0.006896	0.649364	0.87949	0.905802	0.846314	0.975798	1.02437	0.509297	0.532739	0.575582	11.2441	0.101836	0	0	0	0	0	0	0	7.0032	0	0.615926	0.266424	0	0	0	0	0	1.85818	9.22241	0.76963	0.49751	-0.05351	0
d548	0	0	-0.12477	-0.002283	0.147991	0.844156	0.058554	0.069625	0.949328	-0.076407	0.080905	0.126709	0.138524	0.163854	0.038415	0.024645	0.654733	0.868614	0.87936	0.847517	0.951347	0.993748	0.476014	0.500091	0.543846	13.5847	0.103384	0	0	0	0	0	0	0	6.88612	0	0.601345	0.229765	0	0	0	0	0	1.87525	9.2888	0.76144	0.48827	-0.04561	0
d549	0	0	-0.104514	-0.015986	0.153211	0.630478	-0.037676	0.063185	1.05798	-0.05964	0.087428	0.142603	0.150865	0.206551	-0.024342	0.01397	0.64518	0.847253	0.840687	0.807556	1.0029	1.05045	0.435948	0.48602	0.54985	10.8081	0.540476	0	0	0	0	0	0	0	6.94389	0	0.609452	0.260858	0	0.636612	0	0	0	1.87173	9.24335	0.76812	0.50314	-0.05476	0
d550	0	0	-0.352293	0.418514	-0.296588	0.835937	-0.222673	-0.015039	1.96718	-0.158165	-0.121677	-0.025927	0.046821	0.132171	-0.124912	0.040419	0.433493	0.997615	0.956089	0.836136	1.00884	0.986046	0.711114	0.648481	0.749416	9.71578	0	0	0	0	0	0	0	0	-0.923232	0	0	0	0	0	0	0	0	1.91089	9.2137	0.80189	0.54182	-0.0976	0
d551	0	0	-0.162142	0.045997	-0.053299	0.74841	-0.024065	-0.119719	0.921286	-0.100097	-0.02777	0.129256	0.139915	0.172681	-0.015854	-0.075324	0.693025	0.877288	0.984905	0.866228	1.02742	1.05567	0.495962	0.519298	0.561865	13.8386	0.007563	0	0	0	0.946394	0	0	0	6.54292	0	0.560011	0.267279	0.46722	0	0	0	0.479174	1.91951	9.4773	0.75912	0.48575	-0.04347	0
d552	0	0	-0.099208	-0.353965	-0.194638	-0.585065	0.093184	0.058759	1.08664	-0.038221	-0.074648	0.069236	0.078853	0.10193	0.065917	0.164701	0.785736	0.90944	0.910899	0.917787	0.933388	1.04611	0.628269	0.668559	0.498447	11.8567	0.237158	0	0	0	0	0	0	0	7.58443	0	0.678123	0.276459	0	0	0	0	0	1.65155	9.04414	0.808	0.5082	-0.06735	0
d553	0	0	-0.042017	-0.081235	-0.165148	-0.146875	-0.053571	-0.155831	1.07264	-0.021761	-0.059825	0.039278	0.053947	0.073524	-0.035432	0.050314	0.491331	0.946806	0.940223	0.915635	0.989689	0.937196	0.437269	0.612247	0.528812	14.5187	0.228857	0	0	0	0	0	0	0	6.39299	0	0.542125	0.282718	0	0	0	0	0	2.02969	9.29584	0.75731	0.48889	-0.04549	0
d554	0	0	-0.188384	0.088351	-0.12336	0.656478	-0.212576	0.042372	0.860278	-0.101138	-0.047458	-0.006696	0.012968	0.048381	-0.141018	-0.006261	0.697787	0.967905	0.956433	0.956582	1.11972	1.05674	0.487738	0.494586	0.544085	15.8965	0.067256	0	0	0	0	0	0	0	6.95512	0	0.607387	0.335369	0	0	0	0	0	1.8428	9.28321	0.75444	0.48549	-0.03915	0
d555	0	0	-0.22526	0.008118	-0.269541	1.18393	-0.066	-0.2878	1.07299	-0.147951	-0.171903	0.147271	0.190011	0.170288	-0.042642	-0.016542	0.803828	0.866551	0.817732	0.817898	1.05175	1.07146	0.537513	0.483076	0.510927	11.5421	0.07788	0	0	0	0	0	0	0	6.79285	0	0.590269	0.35564	0	0	0	0	0	1.88044	9.33341	0.76812	0.49938	-0.05335	0
d556	0	0	-0.267973	0.40648	-0.040949	1.88807	0.229721	0.448692	1.4629	-0.110947	-0.014905	0.069345	0.042262	-0.00823	0.144796	0.07164	0.920778	0.946243	0.904567	0.963582	0.844001	1.15745	0.530382	0.580315	0.656815	7.9864	0.325912	0	0	0	0	0	0	0	7.36092	0	0.65583	0.401009	0	0	0	0	0	3.43338	9.08437	0.80196	0.52069	-0.07393	0
d557	0	0	-0.124442	0.053202	-0.025388	1.18033	0.006777	-0.173258	0.72102	-0.070208	-0.012491	0.139159	0.155679	0.155904	0.004467	-0.065379	0.726982	0.898036	1.01491	0.891208	1.05827	1.0664	0.47864	0.521626	0.57266	18.898	0.483405	0	0	0	1.81986	0	0	0	5.97816	0	0.497288	0.258248	0.444464	0	0	0	0.471838	2.0073	9.75683	0.75641	0.48427	-0.04219	0
d558	0	0	-0.160305	0.001538	0.11876	-0.213871	0.137205	0.080102	0.689265	-0.047771	0.027506	0.167825	0.212651	0.206192	0.095788	0.045842	0.807717	0.834313	0.838886	0.821096	0.94299	0.993691	0.629719	0.633844	0.625332	20.7401	0.000359	0	0	0	0	0	0	0	5.3516	0	0.421095	0.295429	0	0	0	0	0	2.02958	10.2957	0.76593	0.48555	-0.04155	0
d559	0	0	-0.135863	-0.239011	-0.55821	-0.12744	-0.216834	-0.083183	1.94291	-0.041906	-0.156233	-0.133894	-0.09533	-0.043681	-0.141956	-0.006632	0.747919	1.14203	1.12038	1.07514	1.10354	0.933319	0.752377	0.713356	0.552067	6.02975	0.000476	0	0	0	0.861026	0	0	0	6.92102	0	0.61215	0.398662	0.861026	0	0	0	0.861026	1.72762	9.27223	0.85958	0.55534	-0.11811	0
d560	0	0	0.135039	-0.402231	0.057066	-0.835439	-0.439977	0.313003	1.89043	0.094024	0.039734	-0.15669	-0.130235	-0.025626	-0.271797	-0.19802	0.451224	1.12525	1.06483	1.03401	1.19324	0.866556	0.871534	0.697636	0.601443	3.89627	0.202773	0	0	0	0.820396	0	0	0	7.14182	0	0.648617	0.391447	0.820396	0	0	0	0.820396	0	0	0.83974	0.5506	-0.11005	0
d561	0	0	-0.179489	-0.121819	0.034906	0.085781	0.029339	-0.091571	1.49648	-0.109236	0.016741	-0.008377	0.027149	0.089637	0.01886	-0.055237	0.709235	0.963035	0.927865	0.924953	0.92658	0.986842	0.542499	0.630718	0.543728	8.52913	0.059521	0	0	0	0	0	0	0	7.15526	0	0.622915	0	0	0	0	0	0	2.10543	9.29141	0.77642	0.50137	-0.05877	0
d562	0	0	-0.157445	-0.013714	-0.071314	0.043914	-0.130167	-0.241033	1.23698	-0.091423	-0.034089	0.036078	0.068396	0.123037	-0.080914	-0.033346	0.915412	0.926762	0.965608	0.915664	1.04888	1.00834	0.621115	0.609395	0.634104	9.05268	0.1193	0	0	0	0.892216	0	0	0	7.21378	0	0.640272	0	0.446108	0	0	0	0.446108	1.8036	9.13218	0.79556	0.51863	-0.07463	0
d563	0	0	-0.174885	-0.240774	0.052754	-0.522299	0.093895	0.037937	0.68879	-0.054585	0.014189	0.101531	0.12787	0.150102	0.065551	0.002661	0.803479	0.892347	0.886871	0.868765	0.932772	0.974124	0.637759	0.681192	0.62518	24.4039	0.160659	0	0	0	0	0	0	0	6.67508	0	0.569704	0.282558	0	0	0	0	0	1.87114	9.49574	0.76593	0.48392	-0.04106	0
d564	0	0	-0.166327	0.009214	-0.14964	0.693293	0.047679	-0.070978	0.9715	-0.105184	-0.077583	0.10513	0.100915	0.145847	0.031893	-0.090396	0.713051	0.905878	1.0333	0.897506	0.975954	1.12589	0.488917	0.503812	0.570884	12.6525	0.204272	0	0	0	0.97446	0	0	0	6.42148	0	0.545968	0.269315	0.479145	0	0	0	0.495315	1.93733	9.54026	0.75972	0.48389	-0.04271	0
d565	0	0	-0.147399	-0.04301	-0.15611	0.871128	0.044612	0.044103	0.682431	-0.065277	-0.056354	0.130315	0.124214	0.150287	0.030895	-0.015568	0.732505	0.873105	0.933369	0.8628	0.966597	0.944689	0.606877	0.543414	0.598596	22.2572	0.05847	0	0	0	0.520531	0	0	0	6.06592	0	0.497644	0.288968	0.520531	0	0	0	0.520531	1.93206	9.87425	0.74431	0.47349	-0.02963	0
d566	0	0	-0.142395	0.001693	-0.173043	1.26999	0.131562	0.052945	0.64049	-0.071621	-0.078351	0.159443	0.16481	0.176414	0.088043	0.001283	0.699297	0.851541	0.902078	0.846164	0.929917	1.01212	0.452761	0.481011	0.52637	22.2336	0.2156	0	0	0	0.929727	0	0	0	6.29396	0	0.531215	0.222478	0.461783	0	0	0	0.467944	1.96706	9.61567	0.74889	0.47813	-0.03595	0
d567	0	0	-0.233019	0.0075	-0.149938	-0.119404	-0.038829	0.063416	0.787649	-0.113349	-0.050873	0.074822	0.128576	0.192718	-0.025907	0.073808	0.700373	0.865798	0.89613	0.835998	0.960199	1.07616	0.587401	0.574609	0.59905	19.7347	0.056097	0	0	0	0	0	0	0	6.06987	0	0.494658	0	0	0	0	0	0	1.95627	9.94117	0.74955	0.4808	-0.03426	0
d568	0	0	-0.181992	-0.112129	0.099826	-0.247001	-0.041472	0.065017	1.1273	-0.092274	0.0389	-0.03882	0.033574	0.095922	-0.028271	0.09675	0.642608	0.954372	0.851796	0.870674	0.955882	1.06579	0.599859	0.607551	0.56164	11.5246	0.238394	0	0	0	0	0	0	0	7.20818	0	0.635403	0	0	0	0	0	0	3.51364	9.18801	0.78105	0.49946	-0.05478	0
d569	0	0	-0.250724	-0.029526	-0.250826	-0.316343	-0.008453	0.098836	0.652011	-0.102607	-0.069488	0.081161	0.136481	0.195946	-0.005657	0.05083	0.704292	0.85692	0.891281	0.832126	0.938859	1.06196	0.609098	0.601586	0.620458	27.6695	0.125547	0	0	0	0	0	0	0	5.5036	0	0.433996	0	0	0	0	0	0	2.025	10.2736	0.74422	0.47769	-0.03032	0
d570	0	0	-0.006426	0.116619	0.152871	-0.102609	-0.123358	0.086404	1.71961	-0.00352	0.076188	0.018114	0.093472	0.064143	-0.076097	-0.09592	0.805438	0.898276	0.876258	1.02761	1.1503	0.971034	0.677076	0.677593	0.774488	5.02746	0.055974	0	0	0	0	0	0	0	7.43449	0	0.65907	0.763429	0	0	0	0	0	1.73668	9.13027	0.84624	0.55657	-0.11404	0
d571	0	0	-0.204355	0.015996	0.041062	0.502821	-0.079214	-0.016839	1.40753	-0.139309	0.029443	0.018827	0.053343	0.104548	-0.051876	0.0146	0.729056	0.961101	0.885927	0.895018	1.0108	1.01643	0.482057	0.511632	0.572732	6.77867	0.225284	0	0	0	0.93546	0	0	0	7.34015	0	0.66176	0.356455	0.418951	0.553653	0	0	0.516509	1.77118	8.99045	0.77879	0.50519	-0.06014	0
d572	0	0	0.088331	-0.429219	-0.171173	-0.374309	-0.205367	0.021218	1.25452	0.048477	-0.082528	0.037607	0.024732	0.100536	-0.134542	0.07676	0.66827	0.943118	0.936961	0.891762	1.066	1.0317	0.803007	0.736092	0.581855	8.40187	0.139186	0	0	0	1.40952	0	0	0	6.89504	0	0.610972	0.394006	0.570548	0.444645	0	0	0.838976	0	0	0.78258	0.50817	-0.0615	0
d573	0	0	0.070803	-0.415109	-0.016525	-0.539547	-0.252147	-0.066152	1.54245	0.035657	-0.008433	-0.023673	-0.027712	0.031994	-0.160696	0.067624	0.691756	1.00865	0.981175	0.959871	1.11002	0.969033	0.805206	0.725022	0.578839	6.76717	0.234119	0	0	0	1.40237	0	0	0	6.99464	0	0.624504	0.389718	0.566389	0.458634	0	0	0.835986	0	0	0.82222	0.54103	-0.09409	0
d574	0	0	0.04432	-0.045944	-0.009239	-0.376043	0.128573	-0.252047	1.0519	0.038653	-0.008382	-0.00342	0.017499	0.040098	0.091493	-0.028462	0.401301	0.970791	0.952105	0.912724	0.846523	0.86907	0.631886	0.949488	0.868558	7.24307	0	0	0	0	0	0	0	0	7.26933	0	0.651782	0	0	0	0	0	0	3.44607	0	0.7537	0.47563	-0.03163	0
d575	0	0	-0.125889	-0.008279	-0.177326	0.312199	-0.172407	-0.196681	1.21254	-0.087313	-0.113955	-0.069845	0.02216	0.042808	-0.112357	-0.059564	0.591076	1.02385	0.992976	0.953346	1.09671	1.09807	0.495008	0.513534	0.527575	10.2992	0.052589	0	0	0	0	0	0	0	6.82661	0	0.593818	0.370109	0	0	0	0	0	1.87472	9.32259	0.76992	0.49863	-0.05349	0
d576	0	0	0.065437	-0.211298	0.051206	-0.203881	0.08939	0.077627	0.551494	0.019412	0.014743	0.107492	0.118303	0.089082	0.061635	-0.019391	0.876946	0.883253	0.889426	0.923952	0.955165	1.02703	0.682568	0.932978	0.776072	27.5832	0.284722	0	0	0	0	0	0	0	6.33186	0	0.533617	0.255351	0	0	0	0	0	3.76855	0	0.76667	0.48189	-0.03893	0
d577	0	0	0.179089	-0.293035	-0.22621	-0.013111	0.08959	0.079661	0.558265	0.052111	-0.063335	0.120896	0.123938	0.097582	0.061005	0.016404	0.81753	0.867488	0.86406	0.910971	0.946744	1.03224	0.7291	0.834802	0.675031	27.6447	0.302246	0	0	0	0	0	0	0	5.85897	0	0.483098	0.254972	0	0	0	0	0	3.77337	0	0.77007	0.48501	-0.04194	0
d578	0	0	-0.189813	0.056431	-0.031124	0.188362	-0.111102	0.010508	1.36911	-0.120808	-0.018158	0.025038	0.082203	0.085836	-0.067149	0.096709	0.7025	0.905795	0.870753	0.917557	1.03592	1.04855	0.552015	0.590587	0.640573	8.89256	0.075312	0	0	0	0	0	0	0	7.2815	0	0.646457	0	0	0	0	0	0	1.78325	9.12607	0.79167	0.52348	-0.07803	0
d579	0	0	0.181527	-0.820061	-0.312216	-1.19876	-0.280841	0.095788	1.97715	0.060838	-0.102524	-0.05297	-0.061129	0.018425	-0.170931	0.092645	0.664744	1.0447	1.02942	0.962256	1.09877	1.00486	0.916348	0.786922	0.623304	9.11446	0.732444	0	0	0	1.72588	0	0	0	6.90016	0	0.607535	0	0.862939	0	0	0	0.862939	0	0	0.82976	0.55141	-0.10596	0
d580	0	0	-0.137829	0.369865	0.192849	1.62325	0.155574	0.083342	0.618811	-0.03561	0.038833	0.075502	0.077316	0.055613	0.109154	-0.004194	1.11413	0.906689	0.932876	0.97711	0.913069	1.01606	0.618324	0.72757	0.742969	28.7636	0.465477	0	0	0	0	0	0	0	6.70977	0	0.568696	0.287124	0	0.467634	0	0	0	1.8031	9.54904	0.76044	0.48046	-0.03827	0
d581	0	0	-0.189813	0.056431	-0.031124	0.188362	-0.111102	0.010508	1.36911	-0.120808	-0.018158	0.025038	0.082203	0.085836	-0.067149	0.096709	0.7025	0.905795	0.870753	0.917557	1.03592	1.04855	0.552015	0.590587	0.640573	8.35015	0.075312	0	0	0	0	0	0	0	7.2815	0	0.646457	0	0	0	0	0	0	1.78325	9.12607	0.79167	0.52348	-0.07803	0
d582	0	0	0.181527	-0.820061	-0.312216	-1.19876	-0.280841	0.095788	1.97715	0.060838	-0.102524	-0.05297	-0.061129	0.018425	-0.170931	0.092645	0.664744	1.0447	1.02942	0.962256	1.09877	1.00486	0.916348	0.786922	0.623304	9.11446	0.732444	0	0	0	1.72588	0	0	0	6.90016	0	0.607535	0	0.862939	0	0	0	0.862939	0	0	0.82976	0.55141	-0.10596	0
d583	0	0	0.053919	0.177289	0.190854	0.417614	-0.13714	-0.223308	1.4423	0.023562	0.068012	0.118214	0.16274	0.199082	-0.090462	0.013571	0.801345	0.855882	0.908364	0.83448	1.08483	1.10854	0.662168	0.584146	0.670357	6.46465	0.027977	0	0	0	0	0	0	0	7.13382	0	0.618618	0.768387	0	-0.295053	0	0	0	1.7823	9.33406	0.82895	0.53372	-0.09032	0
d584	0	0	-0.131183	-0.058006	-0.2132	0.900658	0.059278	-0.070307	0.692516	-0.065799	-0.091768	0.088898	0.100232	0.10215	0.040864	-0.083126	0.787625	0.932248	0.992901	0.949081	1.0057	1.06443	0.447115	0.501216	0.560564	18.4028	0.529093	0	0	0	0.982294	0	0	0	5.98212	0	0.496452	0.251565	0.483208	0	0	0	0.499086	1.99995	9.77649	0.75026	0.47631	-0.03423	0
d585	0	0	-0.479634	0.027754	-0.135674	1.18219	-0.253127	-0.173401	1.63421	-0.120565	-0.025126	-0.181836	-0.120592	-0.075367	-0.16482	0.077165	0.568708	1.12901	1.07138	1.04274	1.12063	0.959293	0.468008	0.459219	0.466051	18.5362	0	0	0	0	0	0	0	0	6.59901	0	0.56122	0.44572	0	0	0	0	0	1.85052	9.52376	0.78605	0.51436	-0.0686	0
d586	0	0	-0.08165	-0.053061	-0.066042	0.291846	0.041927	-0.063365	0.705343	-0.03713	-0.024839	0.076917	0.121149	0.147411	0.027999	0.035101	0.745196	0.908237	0.915696	0.88787	0.977988	0.958661	0.475627	0.537534	0.579328	20.0242	0.007315	0	0	0	0	0	0	0	5.79696	0	0.468231	0.284426	0	0	0	0	0	2.0079	10.0363	0.74955	0.4808	-0.03426	0
d587	0	0	-0.294766	0.458664	-0.194582	2.36798	0.142498	0.101222	1.57459	-0.124213	-0.068053	0.134366	0.082664	0.036492	0.100489	0.028551	0.966091	0.875147	0.911807	0.924227	0.927968	1.35715	0.501191	0.433718	0.939518	5.96361	0.356474	0	0	0	1.1271	0	0	0	6.64271	0	0.573543	0.39081	0.541992	0	0	0	0.585106	1.83223	9.37851	0.80175	0.51423	-0.07084	0
d588	0	0	-0.294766	0.458664	-0.194582	2.36798	0.142498	0.101222	1.57459	-0.124213	-0.068053	0.134366	0.082664	0.036492	0.100489	0.028551	0.966091	0.875147	0.911807	0.924227	0.927968	1.35715	0.501191	0.433718	0.939518	5.96361	0.356474	0	0	0	1.1271	0	0	0	6.64271	0	0.573543	0.39081	0.541992	0	0	0	0.585106	1.83223	9.37851	0.80175	0.51423	-0.07084	0
d589	0	0	-0.294766	0.458664	-0.194582	2.36798	0.142498	0.101222	1.57459	-0.124213	-0.068053	0.134366	0.082664	0.036492	0.100489	0.028551	0.966091	0.875147	0.911807	0.924227	0.927968	1.35715	0.501191	0.433718	0.939518	5.96361	0.356474	0	0	0	1.1271	0	0	0	6.64271	0	0.573543	0.39081	0.541992	0	0	0	0.585106	1.83223	9.37851	0.80175	0.51423	-0.07084	0
d590	0	0	-0.294766	0.458664	-0.194582	2.36798	0.142498	0.101222	1.57459	-0.124213	-0.068053	0.134366	0.082664	0.036492	0.100489	0.028551	0.966091	0.875147	0.911807	0.924227	0.927968	1.35715	0.501191	0.433718	0.939518	5.96361	0.356474	0	0	0	1.1271	0	0	0	6.64271	0	0.573543	0.39081	0.541992	0	0	0	0.585106	1.83223	9.37851	0.80175	0.51423	-0.07084	0
d591	0	0	-0.294766	0.458664	-0.194582	2.36798	0.142498	0.101222	1.57459	-0.124213	-0.068053	0.134366	0.082664	0.036492	0.100489	0.028551	0.966091	0.875147	0.911807	0.924227	0.927968	1.35715	0.501191	0.433718	0.939518	5.96361	0.356474	0	0	0	1.1271	0	0	0	6.64271	0	0.573543	0.39081	0.541992	0	0	0	0.585106	1.83223	9.37851	0.80175	0.51423	-0.07084	0
d592	0	0	-0.294766	0.458664	-0.194582	2.36798	0.142498	0.101222	1.57459	-0.124213	-0.068053	0.134366	0.082664	0.036492	0.100489	0.028551	0.966091	0.875147	0.911807	0.924227	0.927968	1.35715	0.501191	0.433718	0.939518	5.96361	0.356474	0	0	0	1.1271	0	0	0	6.64271	0	0.573543	0.39081	0.541992	0	0	0	0.585106	1.83223	9.37851	0.80175	0.51423	-0.07084	0
d593	0	0	-0.294766	0.458664	-0.194582	2.36798	0.142498	0.101222	1.57459	-0.124213	-0.068053	0.134366	0.082664	0.036492	0.100489	0.028551	0.966091	0.875147	0.911807	0.924227	0.927968	1.35715	0.501191	0.433718	0.939518	5.96361	0.356474	0	0	0	1.1271	0	0	0	6.64271	0	0.573543	0.39081	0.541992	0	0	0	0.585106	1.83223	9.37851	0.80175	0.51423	-0.07084	0
d594	0	0	-0.294766	0.458664	-0.194582	2.36798	0.142498	0.101222	1.57459	-0.124213	-0.068053	0.134366	0.082664	0.036492	0.100489	0.028551	0.966091	0.875147	0.911807	0.924227	0.927968	1.35715	0.501191	0.433718	0.939518	5.96361	0.356474	0	0	0	1.1271	0	0	0	6.64271	0	0.573543	0.39081	0.541992	0	0	0	0.585106	1.83223	9.37851	0.80175	0.51423	-0.07084	0
d595	0	0	-0.294766	0.458664	-0.194582	2.36798	0.142498	0.101222	1.57459	-0.124213	-0.068053	0.134366	0.082664	0.036492	0.100489	0.028551	0.966091	0.875147	0.911807	0.924227	0.927968	1.35715	0.501191	0.433718	0.939518	5.96361	0.356474	0	0	0	1.1271	0	0	0	6.64271	0	0.573543	0.39081	0.541992	0	0	0	0.585106	1.83223	9.37851	0.80175	0.51423	-0.07084	0
d596	0	0	-0.294766	0.458664	-0.194582	2.36798	0.142498	0.101222	1.57459	-0.124213	-0.068053	0.134366	0.082664	0.036492	0.100489	0.028551	0.966091	0.875147	0.911807	0.924227	0.927968	1.35715	0.501191	0.433718	0.939518	5.96361	0.356474	0	0	0	1.1271	0	0	0	6.64271	0	0.573543	0.39081	0.541992	0	0	0	0.585106	1.83223	9.37851	0.80175	0.51423	-0.07084	0
d597	0	0	-0.294766	0.458664	-0.194582	2.36798	0.142498	0.101222	1.57459	-0.124213	-0.068053	0.134366	0.082664	0.036492	0.100489	0.028551	0.966091	0.875147	0.911807	0.924227	0.927968	1.35715	0.501191	0.433718	0.939518	5.96361	0.356474	0	0	0	1.1271	0	0	0	6.64271	0	0.573543	0.39081	0.541992	0	0	0	0.585106	1.83223	9.37851	0.80175	0.51423	-0.07084	0
d598	0	0	-0.238525	0.176908	-0.067049	0.437477	-0.095254	-0.099615	1.7834	-0.127776	-0.031664	0.011254	0.015181	0.112254	-0.06198	-0.029074	0.751606	0.931087	1.01077	0.906906	0.994906	1.0097	0.605689	0.770098	0.825982	7.91932	0.014808	0	0	0	0	0	0	0	7.31387	0	0.652934	0	0	0	0	0	0	1.76046	9.07324	0.80732	0.52609	-0.08095	0
d599	0	0	-0.238525	0.176908	-0.067049	0.437477	-0.095254	-0.099615	1.7834	-0.127776	-0.031664	0.011254	0.015181	0.112254	-0.06198	-0.029074	0.751606	0.931087	1.01077	0.906906	0.994906	1.0097	0.605689	0.770098	0.825982	7.91932	0.014808	0	0	0	0	0	0	0	7.31387	0	0.652934	0	0	0	0	0	0	1.76046	9.07324	0.80732	0.52609	-0.08095	0
d600	0	0	-0.172607	-0.01925	-0.067589	0.364214	-0.185731	-0.189054	1.49197	-0.118764	-0.048308	0.037555	0.074587	0.15736	-0.120678	0.124812	0.676052	0.945597	0.919236	0.853885	1.06523	1.05685	0.470734	0.501229	0.55002	6.02447	0.221754	0	0	0	0.950938	0	0	0	7.26606	0	0.651438	0.365737	0.417076	0.541354	0	0	0.533863	1.79216	9.04215	0.78387	0.51127	-0.06539	0
d601	0	0	-0.138864	0.009481	0.130906	0.427112	-0.288254	0.084928	0.968738	-0.081356	0.060224	0.008658	0.019105	0.072258	-0.192305	-0.026617	0.758978	0.97508	0.987648	0.936241	1.17549	1.13567	0.441663	0.467613	0.531766	12.3401	0.215176	0	0	0	1.04185	0	0	0	6.62244	0	0.569706	0.313959	0.496672	0.524677	0	0	0.545179	1.92121	9.43055	0.7585	0.49202	-0.04465	0
d602	0	0	-0.243603	-0.0095	0.008123	0.781735	0.041121	-0.098197	1.32373	-0.170613	0.006799	-0.077608	-0.041378	-0.033927	0.0264	-0.015073	0.656475	1.07235	0.958599	0.98624	0.918486	0.922043	0.52725	0.478045	0.525218	6.54032	0.197621	0	0	0	0.444536	0	0	0	7.36304	0	0.66639	0.340681	0.444536	0.559702	0	0	0.444536	1.76829	8.9567	0.78191	0.50321	-0.0618	0
d603	0	0	-0.243603	-0.0095	0.008123	0.781735	0.041121	-0.098197	1.32373	-0.170613	0.006799	-0.077608	-0.041378	-0.033927	0.0264	-0.015073	0.656475	1.07235	0.958599	0.98624	0.918486	0.922043	0.52725	0.478045	0.525218	6.54032	0.197621	0	0	0	0.444536	0	0	0	7.36304	0	0.66639	0.340681	0.444536	0.559702	0	0	0.444536	1.76829	8.9567	0.78191	0.50321	-0.0618	0
d604	0	0	-0.119822	-0.019544	-0.175169	0.551885	-0.045695	-0.075297	1.15208	-0.083895	-0.103918	0.100109	0.117702	0.166139	-0.029892	-0.019686	0.55282	0.890466	0.974917	0.865915	1.01493	1.0856	0.508479	0.528298	0.565953	11.1143	0.044932	0	0	0	0	0	0	0	6.98436	0	0.613462	0.269162	0	0	0	0	0	1.84237	9.23126	0.76825	0.49281	-0.05044	0
d605	0	0	-0.171557	0.022122	-0.149077	0.180247	-0.153995	0.053908	1.41445	-0.129706	-0.101775	0.005972	0.041043	0.142989	-0.099054	-0.002132	0.639834	0.941168	0.991364	0.879615	1.02083	1.06221	0.55941	0.583495	0.615181	8.94936	0.0244	0	0	0	0	0	0	0	7.29986	0	0.654134	0	0	0	0	0	0	1.79114	9.04634	0.77963	0.50556	-0.06156	0
d606	0	0	-0.067882	0.002772	-0.022888	1.3904	0.10807	-0.016772	0.604033	-0.024607	-0.007109	0.121825	0.103223	0.075499	0.070333	-0.039321	0.888059	0.889937	0.974584	0.945759	0.965123	1.01879	0.512232	0.652088	0.714771	25.4869	0	0	0	0	2.44503	0	0	0	5.33493	0	0.425258	0.259783	0.430115	0.449142	0	0	0.54612	2.05434	10.1733	0.76229	0.49069	-0.04876	0
d607	0	0	-0.141312	0.02583	-0.012816	0.721192	-0.092337	0.007253	?	-0.174821	-0.016581	0.19228	0.122858	0.191253	-0.186504	0	0.807849	0.524383	0.612207	0.637521	1.45848	1.44212	0	0	0	8.96526	0.107343	0	0	0	0	0	0	0	0	0	0	0	0	0	0	0	0	0	0	0.74063	0.56604	-0.11891	0
d608	0	0	-0.201029	-0.094878	0.183039	0.62862	0.099018	0.017215	0.798694	-0.064651	0.054494	0.137408	0.172544	0.157999	0.068284	-0.047149	1.09516	0.859618	0.855026	0.874308	0.965301	1.03353	0.637672	0.673181	0.665537	19.1218	0.218633	0	0	0	0	0	0	0	6.36453	0	0.529835	0.278031	0	0	0	0	0	1.92128	9.73381	0.7892	0.49735	-0.05606	0
d609	0	0	0.131035	-0.029688	-0.045001	-2.01543	-0.223248	-0.129732	2.39757	0.047525	-0.013778	-0.072042	0.019471	0.080571	-0.141658	0.034585	0.534177	1.0292	1.04657	0.927028	1.08736	0.989981	0.61262	0.84231	0.707076	7.32823	0.366452	0	0	0	0	0	0	0	7.09245	0	0.62339	0.765208	0	0	0	0	0	1.91338	9.23218	0.85167	0.56586	-0.12301	0
d610	0	0	-0.106437	0.260765	-0.214505	1.37161	0.16432	0.238684	2.06688	-0.04783	-0.081173	0.048372	0.013014	-0.012979	0.113382	0.029038	0.656429	0.967591	0.989162	0.980322	0.885342	1.2632	0.477759	0.489723	0.52963	3.43843	0.214517	0	0	0	0	0	0	0	7.38201	0	0.659885	0.399117	0	0	0	0	0	1.6132	9.03888	0.83333	0.54167	-0.09846	0
d611	0	0	-0.106437	0.260765	-0.214505	1.37161	0.16432	0.238684	2.06688	-0.04783	-0.081173	0.048372	0.013014	-0.012979	0.113382	0.029038	0.656429	0.967591	0.989162	0.980322	0.885342	1.2632	0.477759	0.489723	0.52963	3.43843	0.214517	0	0	0	0	0	0	0	7.38201	0	0.659885	0.399117	0	0	0	0	0	1.6132	9.03888	0.83333	0.54167	-0.09846	0
d612	0	0	-0.273449	0.173296	-0.118365	1.00632	-0.084302	0.084995	1.33496	-0.125899	-0.052236	-0.104841	-0.1153	-0.063199	-0.05845	0.0303	0.798507	1.08034	1.13565	1.05929	1.05744	0.976546	0.569553	0.674188	0.696028	11.2971	0.247115	0	0	0	1.31448	0	0	0	7.30993	0	0.649516	0	0.657242	0	0	0	0.657242	1.71831	9.10897	0.77381	0.5041	-0.05477	0
d613	0	0	0.129321	-0.458333	-0.135473	-0.401288	-0.362498	-0.408234	1.75472	0.078768	-0.116438	0.004137	0.028702	0.078515	-0.217492	0.027591	0.537837	0.992608	0.952207	0.898495	1.14272	0.948617	0.788697	0.708708	0.642681	4.74408	0.446086	0	0	0	1.72064	0	0	0	7.08524	0	0.639424	0.389737	0.450831	0	0	0	0.81898	0	0	0.83	0.55645	-0.11011	0
d614	0	0	-0.119818	-0.0195	-0.17843	0.829429	0.023144	0.014648	0.971344	-0.07622	-0.099814	0.122556	0.137519	0.15927	0.015481	0.00168	0.565196	0.882245	0.942232	0.868234	0.987512	1.0483	0.473736	0.495206	0.534924	13.4549	0.058833	0	0	0	0	0	0	0	6.83911	0	0.595471	0.230582	0	0	0	0	0	1.86384	9.3133	0.75972	0.48389	-0.04271	0
d615	0	0	-0.266899	-0.077801	-0.385562	6.74994	0.156889	-0.088962	3.95724	-0.102024	-0.115801	0.02585	0.053846	0.188571	0.047832	0.188586	0.741488	0.933805	0.894561	0.727333	0.792918	0.940848	0.580327	0.523566	0.516158	9.35295	0.092728	0	0	0	0	0	0	0	7.45561	0	0.653525	0	0	0	13.7319	0	0	1.4254	9.17522	0.88875	0.56984	-0.12791	0
d616	0	0	-0.248463	-0.069572	-0.093584	-0.421257	-0.105653	0.192655	0.686973	-0.105714	-0.028996	0.018572	0.061111	0.138553	-0.071347	0.160532	0.719166	0.921545	0.917533	0.887369	1.00529	1.10587	0.595388	0.583442	0.61701	24.2125	0.096977	0	0	0	0	0	0	0	6.19089	0	0.507381	0	0	0	0	0	0	1.92148	9.88154	0.74318	0.47489	-0.02822	0
d617	0	0	0.066272	-0.410215	-0.086703	-0.435577	0.02681	-0.135094	1.06839	0.034498	-0.039514	0.06345	0.047394	0.062222	0.017342	0.057319	0.7715	0.915311	0.925201	0.968912	0.990726	0.938437	0.839869	0.778772	0.627404	10.9328	0.009789	0	0	0	1.30369	0	0	0	6.94116	0	0.615548	0.247137	0.456125	0	0	0	0.847568	0	0	0.78867	0.50361	-0.06277	0
d618	0	0	-0.17232	-0.017898	-0.068855	0.55383	-0.095539	0.089282	0.921286	-0.107548	-0.042616	0.04135	0.026147	0.085211	-0.062942	0.079863	0.728632	0.955357	1.03598	0.9384	1.04474	1.08268	0.489543	0.533361	0.571547	14.3811	0.073697	0	0	0	0.783217	0	0	0	7.03553	0	0.617861	0.249786	0.391608	0	0	0	0.391608	1.81888	9.22926	0.75912	0.48575	-0.04347	0
d619	0	0	-0.151361	0.018505	0.122013	0.241533	-0.107595	0.178982	1.49771	-0.118737	0.088653	0.018302	0.067288	0.157552	-0.068669	-0.005874	0.631143	0.926796	0.856606	0.848502	0.987757	1.07605	0.555194	0.578481	0.625482	8.55017	0.05266	0	0	0	0	0	0	0	7.31188	0	0.655865	0	0	0	0	0	0	1.80092	9.03904	0.78431	0.51111	-0.06643	0
d620	0	0	-0.187758	0.018938	-0.153775	-9.2e-05	-0.094603	0.051136	0.940632	-0.107814	-0.068045	0.047737	0.089638	0.169703	-0.062117	0.05625	0.69864	0.89135	0.939167	0.852446	0.985993	1.05507	0.570521	0.581965	0.600323	16.3418	0.161846	0	0	0	0	0	0	0	6.50452	0	0.546742	0	0	0	0	0	0	1.91409	9.64227	0.75889	0.48989	-0.04354	0
d621	0	0	-0.186298	0.083718	0.061283	1.01189	0.084461	-0.026277	0.948308	-0.079417	0.022508	0.146134	0.179784	0.174861	0.05594	-0.052783	1.07322	0.831682	0.839105	0.849626	0.955115	1.02718	0.592705	0.605218	0.644689	14.6612	0.021529	0	0	0	0	0	0	0	6.55286	0	0.551914	0.283566	0	0	0	0	0	1.90224	9.62158	0.78421	0.5	-0.0566	0
d622	0	0	-0.006668	0.240485	0.492828	-0.175047	-0.33392	0.077956	2.03908	-0.001894	0.109531	-0.033352	0.045594	0.114116	-0.213082	-0.058707	0.779628	0.983253	1.0584	0.913949	1.19586	1.10316	0.642499	0.574325	0.632873	7.21581	0	0	0	0	0	0	0	0	7.1252	0	0.616166	0.778328	0	0	0	0	0	1.7708	9.35679	0.85425	0.56667	-0.12199	0
d623	0	0	-0.032717	-0.059988	0.353122	-0.273628	-0.036629	0.036565	1.10312	-0.01189	0.119706	0.094312	0.131833	0.139878	-0.025359	-0.028415	0.881972	0.910163	0.944358	0.90792	1.05741	1.07427	0.640095	0.621608	0.634255	10.3679	0.363287	0	0	0	0	0	0	0	7.0587	0	0.610067	0.275664	0	0	0	0	0	1.796	9.36708	0.81565	0.51595	-0.07495	0
d624	0	0	-0.635548	0.256784	-0.72619	1.85126	-0.097352	0.276175	2.02556	-0.124331	-0.114588	0.065976	0.077265	0.121078	-0.061854	0.068854	0.777312	0.937062	1.00727	0.91594	1.0618	1.08129	0.516824	0.502843	0.455425	17.2887	0	0	0	0	1.20712	0	0	0	6.89187	0	0.591592	0.315782	0.603558	0	0	0	0.603558	1.72756	9.41787	0.81212	0.5323	-0.0915	0
d625	0	0	-0.027248	0.071081	0.048018	1.57243	0.250132	-0.080744	0.798133	-0.009875	0.013527	0.162326	0.154454	0.124154	0.160246	0.025243	0.986564	0.80925	0.805179	0.876712	0.84446	1.00872	0.497398	0.66152	0.723301	18.4864	0.315604	0	0	0	0	0	0	0	6.2708	0	0.522929	0.276491	0	0.481609	0	0	0	1.95822	9.72478	0.78219	0.50828	-0.06301	0
d626	0	0	0.088331	-0.429219	-0.171173	-0.374309	-0.205367	0.021218	1.25452	0.048477	-0.082528	0.037607	0.024732	0.100536	-0.134542	0.07676	0.66827	0.943118	0.936961	0.891762	1.066	1.0317	0.803007	0.736092	0.581855	8.40187	0.139186	0	0	0	1.40952	0	0	0	6.89504	0	0.610972	0.394006	0.570548	0.444645	0	0	0.838976	0	0	0.78258	0.50817	-0.0615	0
d627	0	0	-0.122638	-0.002465	-0.051033	0.007796	-0.086047	0.09195	1.32561	-0.073904	-0.029922	-0.027763	0.044214	0.078885	-0.052616	0.111014	0.69223	0.948577	0.880748	0.9155	1.00931	1.06949	0.516602	0.57073	0.596022	9.08475	0.439774	0	0	0	0	0	0	0	7.25381	0	0.642302	0	0	0	0	0	0	1.78865	9.15029	0.7873	0.52246	-0.0751	0
d628	0	0	0.114814	-0.449424	-0.142732	-0.266777	-0.11504	-0.02856	0.917246	0.061766	-0.076784	0.054043	0.014035	0.073536	-0.073127	0.066882	0.726276	0.940798	1.03613	0.939618	1.03597	1.01991	0.806027	0.766729	0.610875	15.8614	0	0	0	0	1.60738	0	0	0	6.72281	0	0.587259	0.246924	0.379234	0	0	0	0.848909	0	0	0.7746	0.50067	-0.05667	0
d629	0	0	-0.162131	-0.221607	-0.034311	0.431613	0.074078	0.079667	0.620618	-0.054015	-0.009891	0.126513	0.130741	0.148696	0.052164	-0.008349	0.813494	0.884716	0.931679	0.875375	0.969266	0.957868	0.655065	0.618164	0.632293	27.2733	0.08453	0	0	0	0.532365	0	0	0	5.95413	0	0.485442	0.278498	0.532365	0	0	0	0.532365	1.94241	9.93559	0.75382	0.47567	-0.03345	0
d630	0	0	-0.182825	0.07751	-0.020014	0.386259	-0.095191	0.127676	1.13601	-0.122111	-0.010133	0.049586	0.093343	0.158027	-0.065465	0.141569	0.695946	0.864731	0.785468	0.807156	0.959101	1.08713	0.551217	0.55387	0.602445	11.0067	0.096631	0	0	0	0	0	0	0	7.22714	0	0.638875	0	0	0	0	0	0	3.51522	9.16329	0.75532	0.48609	-0.04035	0
d631	0	0	-0.221394	-0.011006	-0.199116	-0.139433	-0.025176	0.049678	0.760598	-0.105598	-0.067444	0.070779	0.12516	0.188496	-0.016727	0.03769	0.687069	0.867409	0.90144	0.837012	0.948518	1.05068	0.588126	0.592512	0.610709	22.0056	0.048954	0	0	0	0	0	0	0	5.89775	0	0.476044	0	0	0	0	0	0	1.98527	10.0385	0.74979	0.48222	-0.03525	0
d632	0	0	-0.350356	-0.164235	-0.131362	0.655617	-0.066147	-0.01454	1.00243	-0.091806	-0.026229	0.064806	0.086062	0.108285	-0.044233	-0.02263	0.702489	0.927877	0.923098	0.908988	1.02965	0.998674	0.513145	0.53654	0.530166	25.0201	0	0	0	0	0	0	0	0	6.6973	0	0.574074	0.286555	0	0	0	0	0	1.86296	9.45501	0.7734	0.49447	-0.05151	0
d633	0	0	0.096961	0.314986	0.468142	0.940693	-0.084024	-0.010564	1.3219	0.01931	0.073238	0.11985	0.15727	0.178524	-0.056135	-0.00643	0.886693	0.871137	0.907645	0.851912	1.05979	1.07893	0.631409	0.577888	0.638557	16.5679	0.028283	0	0	0	0	0	0	0	6.60908	0	0.552305	0.41612	0	-0.382987	0	0	0	1.83748	9.68269	0.81951	0.5266	-0.08274	0
d634	0	0	-0.18898	-0.133207	0.089011	-0.546407	-0.076672	-0.037627	1.33124	-0.093928	0.040793	-0.084623	0.018274	0.023745	-0.046927	0.03646	0.659974	1.00931	0.927628	0.979548	1.02283	1.03765	0.607549	0.641152	0.588853	9.41055	0.21277	0	0	0	0	0	0	0	7.25949	0	0.642325	0	0	0	0	0	0	1.78237	9.1556	0.81818	0.5375	-0.09324	0
d635	0	0	-0.22801	-0.067571	0.048575	-0.21344	0.032584	0.022223	0.996781	-0.100924	0.017802	0.048473	0.085793	0.122239	0.02198	0.043103	0.66491	0.927625	0.917336	0.920985	0.999789	1.12815	0.591201	0.617673	0.618699	13.3926	0.270641	0	0	0	0	0	0	0	7.01034	0	0.612763	0.315941	0	0	0	0	0	1.81924	9.27061	0.78718	0.49948	-0.05701	0
d636	0	0	-0.151973	0.03067	-0.061888	0.674573	-0.091857	-0.271156	1.81499	-0.09848	-0.042143	0.064947	0.080679	0.078444	-0.057906	0.052311	0.722276	0.921931	0.907586	0.921921	1.04541	0.994446	0.479829	0.613507	0.694722	5.72732	0.260828	0	0	0	0	0	0	0	7.38634	0	0.665926	0.267901	0	0	0	0	0	2.33843	9.81279	0.79677	0.52	-0.08067	0
d637	0	0	-0.158419	-0.088013	0.098894	0.0429	-0.08486	-0.030153	1.10919	-0.083581	0.051927	0.070241	0.087966	0.156373	-0.056176	-0.067851	0.805645	0.924716	0.966453	0.875735	1.06318	1.15113	0.494756	0.551247	0.597542	10.6652	0.124948	0	0	0	1.03703	0	0	0	6.76518	0	0.587114	0.259132	0.495211	0.531375	0	0	0.541818	1.90023	9.34742	0.7845	0.50627	-0.06173	0
d638	0	0	-0.124254	-0.013622	0.16848	0.175922	-0.104041	0.231651	1.36398	-0.093166	0.117172	0.006514	0.04471	0.143923	-0.066401	0.000604	0.642814	0.936698	0.919772	0.863557	0.980773	1.02541	0.556056	0.585907	0.624331	10.3271	0.102935	0	0	0	0	0	0	0	7.23535	0	0.645701	0	0	0	0	0	0	1.82222	9.0874	0.78034	0.51049	-0.06469	0
d639	0	0	-0.027461	0.122716	0.069515	-0.057194	-0.071145	-0.067514	1.26563	-0.009213	0.022926	-0.104438	0.0128	0.079938	-0.04485	-0.091434	0.768105	1.01938	0.877874	0.88444	0.979599	0.96109	0.654409	0.643875	0.606539	12.2989	0.071787	0	0	0	0	0	0	0	7.09687	0	0.625266	0.724223	0	0	0	0	0	1.85568	9.20644	0.82704	0.55165	-0.1013	0
d640	0	0	0.134594	-0.133722	0.050464	0.146806	0.055866	-0.005987	0.881398	0.03537	0.011277	0.11803	0.155394	0.144029	0.037893	0.006095	0.970414	0.886378	0.927161	0.895309	0.980182	0.997597	0.630489	0.640209	0.646369	17.762	0.054663	0	0	0	0	0	0	0	6.22978	0	0.513753	0.271046	0	0	0	0	0	1.9445	9.82636	0.80594	0.51349	-0.06965	0
d641	0	0	0.086082	-0.407295	-0.099658	-0.997603	-0.00745	-0.23264	1.2321	0.04887	-0.046562	0.042488	0.02877	0.079188	-0.004647	0.062245	0.739092	0.917382	0.938077	0.975336	0.993828	0.922298	0.928046	0.839789	0.679225	9.41158	0.039087	0	0	0	1.31398	0	0	0	6.99941	0	0.621941	0	0.46244	0	0	0	0.851542	0	0	0.79433	0.51315	-0.06964	0
d642	0	0	-0.132911	-0.214205	-0.09282	-0.013009	0.050913	-0.019878	0.836596	-0.051071	-0.032642	0.117917	0.140111	0.153631	0.035492	-0.079793	0.809913	0.897408	0.957924	0.893956	1.00492	1.05794	0.607978	0.640882	0.644352	17.5609	0.034402	0	0	0	0.506604	0	0	0	6.45544	0	0.544297	0.272202	0.506604	0	0	0	0.506604	1.90081	9.61166	0.78333	0.49209	-0.05277	0
d643	0	0	-0.16993	-0.164127	-0.02987	-0.237267	0.007684	0.04041	0.978133	-0.079154	-0.013797	0.086506	0.117712	0.153847	0.005072	-0.03056	0.800825	0.899695	0.927362	0.871758	0.969553	0.989371	0.592452	0.650007	0.619124	15.0968	0.319199	0	0	0	0	0	0	0	7.10578	0	0.627721	0.270381	0	0	0	0	0	1.82414	9.17763	0.78485	0.5005	-0.05857	0
d644	0	0	-0.1725	0.119224	-0.051708	0.419899	-0.007417	0.008527	1.33622	-0.097537	-0.027447	0.018881	0.053502	0.046366	-0.004469	0.071707	0.781431	0.922352	0.868847	0.967732	0.984052	1.01506	0.558065	0.581102	0.574733	8.03605	0.050865	0	0	0	0	0	0	0	7.45802	0	0.668056	0	0	0	0	0	0	1.70667	9.03616	0.79268	0.52444	-0.07931	0
d645	0	0	-0.155199	0.01447	-0.151595	0.118393	-0.164394	0.037117	1.29707	-0.113505	-0.100522	-0.00423	0.021021	0.129375	-0.105561	-0.004083	0.640952	0.94778	1.02649	0.889689	1.0221	1.02426	0.560315	0.593587	0.615389	10.6779	0.057979	0	0	0	0	0	0	0	7.23161	0	0.645025	0	0	0	0	0	0	1.80933	9.09012	0.77642	0.50561	-0.06048	0
d646	0	0	-0.191824	0.055034	0.056903	0.605443	-0.108172	0.118233	0.898073	-0.104284	0.021862	0.044482	0.079877	0.087609	-0.071443	-0.006162	0.755237	0.922399	0.896559	0.900884	1.03808	1.07092	0.49686	0.495396	0.525909	14.6564	0.279931	0	0	0	0	0	0	0	6.39725	0	0.535578	0.312637	0	0	0	0	0	1.9347	9.68328	0.75632	0.48771	-0.04087	0
d647	0	0	-0.069972	-0.217397	0.25362	-0.91435	-0.012681	0.135092	2.71528	-0.029815	0.100178	-0.003844	-0.007968	0.030446	-0.008916	-0.006211	0.927145	0.944113	0.962627	0.980297	0.964747	1.04762	0.717407	0.977467	0.83021	6.35978	0.064243	0	0	0	0	0	0	0	7.15831	0	0.622431	0	0	0	0	0	0	0	0	0.83514	0.54146	-0.09777	0
d648	0	0	-0.099917	0.035998	0.132193	0.692418	0.004731	-0.151358	0.890717	-0.050626	0.053332	0.106814	0.146043	0.109817	0.003066	-0.020698	0.923259	0.86922	0.850855	0.921139	1.03567	1.0617	0.490401	0.510854	0.54434	14.9267	0.125929	0	0	0	0	0	0	0	6.56244	0	0.558048	0.287829	0	0	0	0	0	1.92192	9.53698	0.76548	0.49167	-0.04621	0
d649	0	0	-0.12297	0.016295	0.123726	0.581569	-0.082742	0.050096	0.852826	-0.065425	0.04946	0.030413	0.062884	0.072423	-0.054013	-0.009355	0.742258	0.938476	0.913381	0.916115	1.02561	1.03399	0.475075	0.501958	0.541212	16.2436	0.151427	0	0	0	0	0	0	0	6.29908	0	0.525166	0.309219	0	0	0	0	0	1.95825	9.72661	0.75792	0.49132	-0.04345	0
d650	0	0	-0.267714	0.30799	-0.113631	1.86939	0.219622	0.385355	1.71039	-0.118101	-0.042548	0.066885	0.03384	0.010411	0.141914	0.027414	0.921492	0.941572	0.93974	0.959222	0.846814	1.19743	0.506674	0.541303	0.663633	6.61852	0.309473	0	0	0	0	0	0	0	7.20976	0	0.642028	0.390223	0	0	0	0	0	1.77754	9.09838	0.81282	0.53256	-0.08676	0
d651	0	0	-0.12758	0.017434	-0.165572	0.988021	0.001061	-0.173912	0.850396	-0.077403	-0.091259	0.107516	0.123216	0.128769	0.000695	-0.080587	0.737552	0.924962	1.04015	0.91254	1.04276	1.08618	0.471108	0.514254	0.581943	15.1014	0.573134	0	0	0	1.38875	0	0	0	6.07417	0	0.507932	0.259014	0.447872	0	0	0	0.485002	2.00121	9.70551	0.76296	0.48939	-0.04729	0
d652	0	0	-0.192782	0.04177	-0.028338	0.515123	-0.079543	-0.05982	1.02354	-0.103096	-0.014586	0.09321	0.105919	0.076689	-0.051172	0.03425	0.814385	0.885555	0.881505	0.960197	1.08602	1.05206	0.490614	0.549794	0.61438	10.7443	0.392225	0	0	0	1.00135	0	0	0	6.97874	0	0.607992	0.262049	0.429317	0.498964	0	0	0.572037	1.82567	9.3013	0.77917	0.50721	-0.06175	0
d653	0	0	-0.175836	0.042332	-0.03191	0.380982	-0.122126	-0.045774	1.26511	-0.098272	-0.018375	0.0282	0.072208	0.076555	-0.076596	0.030924	0.821585	0.948511	0.864008	0.910329	1.04332	1.03144	0.478556	0.514231	0.503111	8.17708	0.263457	0	0	0	0.992286	0	0	0	7.35514	0	0.656778	0.385216	0.427362	0.518191	0	0	0.564925	1.73091	9.06804	0.78293	0.51758	-0.06983	0
d654	0	0	0.047455	-0.129088	-0.007714	-0.614115	0.023739	-0.096752	1.66809	0.059933	-0.012178	-0.241351	-0.21505	-0.155393	0.015573	-0.129943	0.450182	1.20666	1.21206	1.22922	0.926025	0.79792	0.516248	1.02389	0.652035	5.14878	0.029609	1	0	0	0	0	0	0	0	0	0	0.36334	0	0	0	0	0	0	0	0.8625	0.54107	-0.10393	0
d655	0	0	-0.188767	-0.282225	0.128807	-1.38869	0.113955	0.126874	0.703517	-0.058798	0.030279	0.132898	0.185238	0.220411	0.074331	0.00037	0.664302	0.824613	0.844797	0.799436	0.891773	1.01032	0.69628	0.747571	0.662844	25.2593	0.306879	0	0	0	0	0	0	0	6.43581	0	0.540484	0.33161	0	0	0	0	0	1.92067	9.65371	0.77667	0.49779	-0.05286	0
d656	0	0	-0.195067	-0.014239	0.127153	1.06282	0.166673	-0.11025	0.594456	-0.08781	0.029945	0.145224	0.114265	0.14743	0.115209	0.021526	0.843195	0.822372	0.85648	0.845638	0.85785	0.886754	0.544103	0.491447	0.486015	21.4855	0	0	0	0	4.03199	0	0	0	5.40299	0	0.42786	0.286858	0.471919	0	0	0	0.517007	2.02385	10.2334	0.73197	0.4707	-0.02333	0
d657	0	0	-0.281518	0.331764	0.069225	2.3946	0.032843	-0.083123	0.735531	-0.082856	0.015687	0.110035	0.143665	0.109668	0.022236	-0.029022	0.886225	0.889016	0.877972	0.923714	1.0203	1.10466	0.609647	0.637082	0.694599	21.2696	0.301616	0	0	0	0	0	0	0	5.94151	0	0.488298	0.290538	0	0	0	0	0	1.98998	9.86708	0.78333	0.49902	-0.05665	0
d658	0	0	-0.125319	0.040479	-0.268372	0.470482	0.075066	-0.051664	1.00187	-0.065297	-0.112573	0.156919	0.181782	0.175403	0.048002	0.058828	0.80789	0.803941	0.847413	0.896057	0.979814	1.01676	0.53654	0.625308	0.648227	13.2653	0.083176	0	0	0	1.12196	0	0	0	6.57999	0	0.556885	0.300262	0.560248	0	0	0	0.561716	1.9024	9.57691	0.77051	0.50055	-0.0561	0
d659	0	0	0.053959	0.175786	0.306167	0.417614	-0.13714	-0.002269	1.4423	0.023579	0.109104	0.118214	0.16274	0.199082	-0.090462	-0.0268	0.805837	0.855882	0.908364	0.83448	1.08483	1.08803	0.662168	0.583888	0.672339	6.46465	0.039263	0	0	0	0	0	0	0	7.15984	0	0.622283	0.765425	0	-0.259522	0	0	0	1.7797	9.31334	0.82895	0.53372	-0.09032	0
d660	0	0	-0.323357	0.445469	-0.241085	1.27671	-0.252296	0.005193	1.81006	-0.187721	-0.125174	-0.029679	-0.004393	0.120834	-0.156018	0.034451	0.65321	0.979165	1.08256	0.914737	1.08817	0.959723	0.694331	0.81242	0.749578	7.52135	0.056622	0	0	0	0	0	0	0	7.10964	-1.31721	0.621898	0	0	0	0	0	0	1.76753	9.25115	0.80614	0.52627	-0.08288	0
d661	0	0	-0.166368	0.051809	-0.043665	0.46661	-0.268303	-0.014971	0.800004	-0.085994	-0.017401	-0.136027	-0.111306	-0.081239	-0.182403	0.055323	0.760326	1.10018	1.07608	1.08413	1.17324	1.02842	0.464645	0.494688	0.54425	16.2416	0.093784	0	0	0	0	0	0	0	6.77613	0	0.583571	0.348611	0	0	0	0	0	1.85409	9.41053	0.74688	0.47987	-0.03275	0
d662	0	0	-0.150604	0.045633	-0.130901	0.427713	-0.261262	-0.050021	0.769732	-0.076437	-0.051655	-0.133135	-0.101673	-0.078024	-0.175609	-0.006095	0.766181	1.0882	1.0553	1.07046	1.15767	1.01102	0.472323	0.509407	0.556573	17.9702	0.033961	0	0	0	0	0	0	0	6.84707	0	0.593428	0.346729	0	0	0	0	0	1.85669	9.35391	0.74734	0.48157	-0.03398	0
d663	0	0	-0.366742	-0.228047	-0.007633	-0.002893	-0.029637	0.018882	1.08933	-0.097485	-0.001727	0.067773	0.095811	0.135299	-0.019365	-0.034603	0.737841	0.911448	0.916487	0.893275	0.998137	1.01583	0.535519	0.56803	0.563607	24.7245	0	0	0	0	0	0	0	0	6.80162	0	0.585748	0.289833	0	0	0	0	0	1.84945	9.40996	0.78244	0.5021	-0.05847	0
d664	0	0	-0.261141	0.144752	-0.115994	0.926204	-0.100577	0.015853	1.38281	-0.122835	-0.051443	-0.090893	-0.073285	-0.040099	-0.06846	0.002152	0.773316	1.05596	1.06369	1.03055	1.06273	0.984916	0.566476	0.685644	0.765639	11.3586	0.231872	0	0	0	1.31178	0	0	0	7.16314	0	0.631321	0	0.65589	0	0	0	0.65589	1.78445	9.19066	0.78	0.5112	-0.06154	0
d665	0	0	-0.258183	0.202424	-0.194959	1.34821	-0.139318	-0.081175	1.23578	-0.162736	-0.118922	0.16932	0.151389	0.161407	-0.096338	-0.001233	0.859433	0.832221	0.836063	0.81941	1.09428	1.14179	0.496776	0.376435	1.08379	7.36356	0.312423	0	0	0	2.00963	0	0	0	6.64842	0	0.576119	0.363282	0.416053	0.529541	0	0	0.561576	1.8803	9.35465	0.76667	0.49216	-0.04783	0
d666	0	0	-0.126531	-0.030355	0.179475	0.174368	-0.006554	0.204125	1.3175	-0.090735	0.122357	0.007867	0.04935	0.145735	-0.004174	-0.006006	0.713723	0.936406	0.871263	0.853252	0.915564	1.06993	0.552703	0.590845	0.6296	10.457	0.116307	0	0	0	0	0	0	0	7.19357	0	0.640232	0	0	0	0	0	0	1.83704	9.11394	0.78095	0.51489	-0.06753	0
d667	0	0	0.099371	-0.4878	-0.065338	-1.49383	-0.005329	-0.162171	1.2564	0.049534	-0.026776	-0.00188	0.002678	0.060905	-0.003328	0.067287	0.659469	0.950072	0.959758	0.996698	0.992197	0.945041	0.939313	0.866266	0.663841	9.39216	0.046341	0	0	0	0.855986	0	0	0	7.00999	0	0.622315	0	0.855986	0	0	0	0.855986	0	0	0.80833	0.52182	-0.07853	0
d668	0	0	0.170176	-0.774	-0.301095	-1.26004	-0.314773	0.07218	2.49213	0.066116	-0.108515	0.021799	-0.025645	0.073562	-0.18627	0.110254	0.640435	0.978774	1.01843	0.914711	1.11129	1.01331	0.969332	0.830055	0.655363	5.88967	0	0	0	0	1.70412	0	0	0	7.06513	0	0.631376	0	0.852061	0	0	0	0.852061	0	0	0.85969	0.57985	-0.1377	0
d669	0	0	0.024712	-0.213893	0.099636	0.544655	-0.085229	-0.103746	1.5068	0.011634	0.043198	0.116048	0.080647	0.117299	-0.05395	-0.002127	1.14118	0.879007	0.968542	0.913177	1.07211	1.03046	0.846735	0.86322	0.834257	8.84579	0.009886	0	0	0	1.36269	0	0	0	6.28151	0	0.530163	0.257126	0.448055	0	0	0	0.914637	0	0	0.81015	0.52349	-0.08195	0
d670	0	0	-0.189813	0.056431	-0.031124	0.188362	-0.111102	0.010508	1.36911	-0.120808	-0.018158	0.025038	0.082203	0.085836	-0.067149	0.096709	0.7025	0.905795	0.870753	0.917557	1.03592	1.04855	0.552015	0.590587	0.640573	8.89256	0.075312	0	0	0	0	0	0	0	7.2815	0	0.646457	0	0	0	0	0	0	1.78325	9.12607	0.79167	0.52348	-0.07803	0
d671	0	0	-0.14252	-0.068162	-0.18948	0.130508	-0.058681	0.085733	0.994252	-0.077833	-0.082941	0.008711	0.053184	0.082206	-0.038128	0.054605	0.656186	0.951251	0.924364	0.950221	1.02237	1.00359	0.502259	0.527884	0.551315	12.1825	0.012596	0	0	0	0	0	0	0	7.06071	0	0.619281	0.285098	0	0	0	0	0	1.81374	9.23928	0.768	0.4918	-0.04688	0
d672	0	0	0.030328	0.00169	-0.092991	0.07173	0.099751	0.012864	0.707384	0.017174	-0.045023	0.123297	0.128335	0.079365	0.067392	0.080467	0.721248	0.858331	0.826648	0.921947	0.932274	0.964043	0.465997	0.69968	0.622666	14.7214	0.109987	0	0	0	0	0	0	0	6.87745	0	0.598574	0.247588	0	0.636281	0	0	0	3.70288	0	0.75263	0.48429	-0.03719	0
d673	0	0	-0.142199	-0.018092	-0.19321	0.663805	0.002316	-0.124236	0.952549	-0.084571	-0.102747	0.106633	0.121051	0.165282	0.001556	-0.079811	0.665772	0.907244	0.995258	0.877577	1.02199	1.12082	0.447772	0.494155	0.557437	11.9705	0.594197	0	0	0	1.48011	0	0	0	6.29833	0	0.532898	0.263596	0.464533	0.571335	0	0	0.527496	1.96254	9.58949	0.76099	0.48841	-0.04489	0
d674	0	0	-0.140342	-0.064642	0.095234	0.625899	0.009119	0.03455	0.846252	-0.064939	0.041871	0.103476	0.122824	0.152873	0.006091	0.011046	0.626823	0.892143	0.869296	0.857285	0.985824	1.01165	0.453464	0.510109	0.528682	15.2699	0.48489	0	0	0	1.01401	0	0	0	6.75638	0	0.585311	0.230119	0.463506	0.55944	0	0	0.550508	1.89607	9.36459	0.765	0.49375	-0.04741	0
d675	0	0	-0.156215	0.250618	-0.101064	1.1495	0.002258	-0.13936	0.907169	-0.091834	-0.041324	0.088986	0.101911	0.088182	0.001475	0.02428	0.603422	0.909185	0.872287	0.914821	0.989308	0.989565	0.524482	0.492293	0.567171	12.2275	0.034	0	0	0	0	0	0	0	-0.854238	0	0	0.264323	0	0	0	0	0	1.96911	9.33734	0.75686	0.48943	-0.04677	0
d676	0	0	-0.142199	-0.018092	-0.19321	0.663805	0.002316	-0.124236	0.952549	-0.084571	-0.102747	0.106633	0.121051	0.165282	0.001556	-0.079811	0.665772	0.907244	0.995258	0.877577	1.02199	1.12082	0.447772	0.494155	0.557437	11.9705	0.594197	0	0	0	1.48011	0	0	0	6.29833	0	0.532898	0.263596	0.464533	0.571335	0	0	0.527496	1.96254	9.58949	0.76099	0.48841	-0.04489	0
d677	0	0	-0.140556	-0.045814	-0.065074	0.164185	-0.014807	0.089443	1.41662	-0.101425	-0.044486	-0.034779	0.023374	0.124635	-0.009769	0.043925	0.663546	0.977393	0.894124	0.885093	0.939281	1.09353	0.523239	0.556053	0.574644	7.80755	0.495795	0	0	0	0	0	0	0	7.40523	0	0.668615	0	0	0	0	0	0	1.75553	8.97479	0.77429	0.5	-0.05567	0
d678	0	0	0.002993	-0.167331	-0.037699	-1.29169	0.221993	-0.195618	1.00831	0.001787	-0.015104	-0.046424	0.004117	0.022173	0.157565	0.022188	0.414354	0.961546	0.926435	0.999615	0.831244	0.98215	0.655547	0.911639	0.653927	9.68547	0.244626	0	0	0	0	0	0	0	7.15635	0	0.63398	0	0	0	0	0	0	3.42247	0	0.78254	0.49302	-0.04819	0
d679	0	0	-0.14591	0.024371	-0.017343	1.21215	0.124928	0.022795	0.65897	-0.074878	-0.008	0.143681	0.148342	0.159365	0.084736	-0.039662	0.800011	0.868044	0.918165	0.863495	0.935084	1.03492	0.445238	0.472436	0.535362	21.0475	0.215035	0	0	0	0.962787	0	0	0	5.75997	0	0.473022	0.222409	0.472575	0	0	0	0.490212	2.06724	9.88733	0.74857	0.4764	-0.03499	0
d680	0	0	-0.169919	0.015457	-0.212868	0.725787	0.045998	-0.091794	0.9715	-0.107444	-0.111584	0.109609	0.118462	0.151916	0.030768	-0.089391	0.699325	0.901447	1.01595	0.891503	0.989124	1.11804	0.486859	0.508999	0.568324	12.6525	0.151178	0	0	0	0.971431	0	0	0	6.36818	0	0.539874	0.269162	0.476116	0	0	0	0.495315	1.946	9.56819	0.75972	0.48389	-0.04271	0
d681	0	0	-0.159318	0.093702	-0.108904	0.51494	-0.048051	-0.133183	0.874518	-0.168348	-0.10385	0.238738	0.232851	0.192641	-0.031683	-0.014256	0.793593	0.776245	0.77655	0.774929	1.009	1.14928	0.497009	0.430738	1.09809	8.45652	0.025518	0	0	0	1.0308	0	0	0	0	0	0	0.379222	0.495239	0	0	0	0.535558	2.0425	9.2965	0.73529	0.47412	-0.03245	0
d682	0	0	-0.142395	0.001692	-0.173292	0.939571	0.099883	-0.000667	0.796298	-0.0803	-0.084903	0.165123	0.158785	0.195042	0.064803	-0.010664	0.680702	0.840952	0.924268	0.831916	0.939892	1.04136	0.470106	0.498735	0.542556	17.5524	0.051949	0	0	0	0.929727	0	0	0	6.48609	0	0.553097	0.242791	0.461783	0	0	0	0.467944	1.94195	9.51618	0.7582	0.48867	-0.04467	0
d683	0	0	-0.166647	-0.117154	-0.176742	0.906501	0.028168	-0.111688	0.817527	-0.062811	-0.055159	0.130052	0.170392	0.127922	0.01872	-0.013609	0.80281	0.875448	0.850169	0.900499	1.02547	1.05803	0.523408	0.588082	0.557328	17.1382	0.1269	0	0	0	0	0	0	0	6.13295	0	0.51067	0.275996	0	0	0	0	0	1.97203	9.74041	0.78283	0.50169	-0.05975	0
d684	0	0	0.040976	-0.043677	0.001014	-0.150678	0.156124	-0.025985	0.715894	0.027994	0.000631	0.085735	0.091157	0.104264	0.11234	0.016509	0.578284	0.905999	0.900247	0.90911	0.892662	0.926871	0.515546	0.800386	0.706412	12.7045	0.382277	0	0	0	0	0	0	0	7.07879	0	0.62696	0.241605	0	0	0	0	0	3.56329	0	0.73867	0.46247	-0.02162	0
d685	0	0	0.00875	-0.048991	0.018779	-0.150678	0.156124	-0.025985	0.715894	0.00646	0.012626	0.085735	0.091157	0.104264	0.11234	0.016509	0.55857	0.905999	0.900247	0.90911	0.892662	0.926871	0.515546	0.800386	0.706412	12.7045	0.382277	0	0	0	0	0	0	0	7.07879	0	0.62696	0.241605	0	0	0	0	0	3.56329	0	0.73867	0.46247	-0.02162	0
d686	0	0	-0.057164	0.143594	0.096551	-0.045134	-0.143617	-0.008527	1.33739	-0.020058	0.032654	-0.130146	-0.021308	0.056532	-0.091803	-0.096667	0.735297	1.05599	0.96562	0.932354	1.0385	0.988413	0.662093	0.63566	0.598509	9.86947	0.048605	0	0	0	0	0	0	0	7.19581	0	0.637788	0.724808	0	0	0	0	0	1.82487	9.14785	0.83192	0.54753	-0.09949	0
d687	0	0	0.421083	-0.267446	0.286901	-2.40116	-0.20152	-0.215984	1.17296	0.132153	0.073482	0.437675	0.457482	0.4699	-0.133622	-0.115108	0.852858	0.573606	0.603377	0.5305	1.17548	1.12464	0.634732	0.717872	0.666554	9.62235	0.134866	0	0	0	0	0	0	0	6.65118	0	0.55983	0.462516	0	0	0	0	0	1.85598	9.61887	0.81867	0.52749	-0.08256	0
d688	0	0	-0.174145	-0.240328	0.108826	-0.572323	0.091835	0.083913	0.68879	-0.054393	0.029349	0.099139	0.117912	0.146986	0.064113	0.046805	0.807064	0.897684	0.919138	0.876614	0.938893	0.975361	0.643894	0.679809	0.624372	24.4039	0.088454	0	0	0	0	0	0	0	6.50901	0	0.548127	0.279922	0	0	0	0	0	1.88169	9.62095	0.76593	0.48392	-0.04106	0
d689	0	0	-0.173845	-0.185022	0.07045	-0.554068	0.089442	0.056908	0.68879	-0.054251	0.019021	0.103801	0.121973	0.151033	0.062443	0.030939	0.848904	0.893075	0.915059	0.872341	0.936284	0.969418	0.644743	0.675263	0.566552	24.4039	0.099291	0	0	0	0	0	0	0	6.20236	0	0.509686	0.278077	0	0	0	0	0	1.88992	9.85205	0.76593	0.48392	-0.04106	0
d690	0	0	-0.173635	0.003034	0.218596	1.0629	0.137164	-0.074923	0.594456	-0.077951	0.050317	0.146142	0.114993	0.148573	0.094812	0.024941	0.834851	0.820739	0.853511	0.843337	0.876472	0.873739	0.547277	0.481255	0.492688	21.9732	0	0	0	0	4.15707	0	0	0	5.37073	0	0.42472	0.298774	0.510062	0	0	0	0.534461	2.02769	10.2476	0.73197	0.4707	-0.02333	0
d691	0	0	-0.214659	-0.037748	-0.051228	0.714708	0.057227	-0.102971	0.686013	-0.091399	-0.015447	0.05974	0.065894	0.060107	0.038998	0.006722	0.751319	0.957591	0.9586	0.99793	0.993178	0.970626	0.470809	0.507459	0.514377	18.3346	0.127026	0	0	0	0	0	0	0	6.40778	0	0.539139	0.270995	0	0	0	0	0	1.90618	9.63335	0.75429	0.47765	-0.0348	0
d692	0	0	-0.138773	0.014913	0.001026	0.286906	-0.198613	-0.021123	0.7131	-0.067117	0.000403	-0.143751	-0.117487	-0.07514	-0.136509	0.061082	0.700591	1.10336	1.07839	1.06791	1.11347	1.03959	0.478671	0.528893	0.573938	19.5756	0.173259	0	0	0	0	0	0	0	6.73547	0	0.577525	0.356147	0	0	0	0	0	1.8575	9.45114	0.73947	0.47487	-0.0273	0
d693	0	0	-0.132079	0.054466	0.080232	0.692324	-0.131691	-0.186681	0.658414	-0.065522	0.020669	0.097822	0.093776	0.134149	-0.091167	-0.012839	0.648909	0.906265	0.911199	0.886283	1.09857	1.10255	0.444846	0.449843	0.503778	19.6081	0.114867	0	0	0	1.07259	0	0	0	6.25405	0	0.526058	0.334469	0.505269	0.46017	0	0	0.567326	1.96674	9.64528	0.73822	0.47576	-0.02797	0
d694	0	0	-0.192288	0.015442	0.123908	-0.044642	0.152665	0.053965	0.672168	-0.057873	0.028857	0.160576	0.201993	0.187689	0.106874	0.041848	0.835054	0.845437	0.849149	0.840308	0.939999	0.97576	0.646891	0.634175	0.628424	20.7962	0.002404	0	0	0	0.992932	0	0	0	5.29639	0	0.415825	0.295429	0.48229	0	0	0	0.510642	2.0347	10.3187	0.76449	0.4842	-0.04045	0
d695	0	0	-0.146457	0.150288	-0.021053	2.50653	0.172837	-0.088156	1.1254	-0.090784	-0.011885	0.091984	0.091114	0.097999	0.107034	0.042431	0.552934	0.898996	0.900397	0.910956	0.840251	0.834888	0.620445	0.603125	0.659927	12.8436	0.344883	0	0	0	0	0	0	0	7.2922	9.31612	0.64696	0.244005	0	0	14.3999	0	0	3.52116	0	0.75976	0.47369	-0.033	0
d696	0	0	0.215765	-0.493464	-0.132295	-0.734	-0.426816	0.401193	2.80928	0.102028	-0.064398	-0.098522	-0.101165	0.008752	-0.263369	-0.233968	0.660421	1.09618	1.04188	1.00168	1.18638	0.875	0.917115	0.592572	0.656646	2.96097	0.135539	0	0	0	1.67928	0	0	0	6.67207	0	0.583469	0.484399	0.837786	0	0	0	0.841491	0	0	0.88452	0.59226	-0.15226	0
d697	0	0	0.158493	-0.396536	0.656123	-0.701109	-0.302334	0.089529	2.94503	0.065343	0.228736	-0.121115	-0.189023	-0.103487	-0.172068	-0.164588	0.829872	1.12235	1.38833	1.16177	1.21494	1.04193	1.0021	0.796721	0.930235	3.24675	0.436063	0	0	0	2.37158	0	0	0	6.62936	0	0.571068	0.414178	0.567195	0	0	0	0.926578	0	0	0.89619	0.61616	-0.17475	0
d698	0	0	0.085588	-0.584644	0.622983	-2.28119	-0.22298	-0.150087	3.90335	0.026657	0.186849	-0.044569	-0.099293	0.021333	-0.125219	-0.109913	0.839554	1.06864	1.19427	1.0252	1.12939	1.02069	0.999183	0.82918	0.833508	2.66836	0.35058	0	0	0	1.83455	0	0	0	5.67969	0	0.499365	0.591776	0.889833	0	0	0	0.944716	0	0	0.94188	0.65762	-0.21708	0
d699	0	0	-0.104509	-0.015943	0.149956	0.855192	0.018729	0.118229	0.898339	-0.056245	0.080704	0.145023	0.155194	0.188968	0.012363	0.027708	0.653103	0.848065	0.83646	0.820546	0.981205	1.02171	0.425542	0.47448	0.533584	13.1487	0.606534	0	0	0	0	0	0	0	6.82593	0	0.594872	0.226786	0	0.634702	0	0	0	1.8888	9.30975	0.76026	0.49301	-0.04653	0
d700	0	0	-0.08075	0.088941	-0.076962	0.211773	0.108893	-0.08311	1.01927	-0.041873	-0.029931	0.053318	0.074575	0.074313	0.071219	0.040388	0.792286	0.872344	0.884346	0.995186	0.956008	0.992768	0.572928	0.640917	0.690183	12.782	0.041952	0	0	0	0	0	0	0	6.95158	0	0.599621	0	0	0	0	0	0	1.8177	9.3891	0.76182	0.49389	-0.0482	0
d701	0	0	-0.292751	0.31364	0.165489	1.26836	0.024702	0.053107	0.902504	-0.099828	0.047416	0.060512	0.083491	0.107218	0.017269	0.047909	0.870864	0.92107	0.931856	0.924184	0.991373	1.13261	0.673805	0.673396	0.758437	15.9164	0	0	0	0	0	0	0	0	6.9888	0	0.608655	0.322983	0	0	0	0	0	1.80982	9.3017	0.78995	0.4966	-0.05582	0
d702	0	0	0.075089	-0.411905	-0.090088	-0.215224	0.02585	-0.100345	0.949559	0.036799	-0.040272	0.070745	0.054947	0.061887	0.01713	0.049581	0.768221	0.914336	0.921782	0.9668	0.994478	0.954758	0.797181	0.760498	0.622045	13.0276	0.041072	0	0	0	1.30369	0	0	0	6.84056	0	0.602857	0.247137	0.456125	0	0	0	0.847568	0	0	0.78061	0.4958	-0.05568	0
d703	0	0	-0.11995	0.169943	0.014529	0.248771	0.013481	0.013472	1.91119	-0.072804	0.007575	-0.0054	0.02341	0.063285	0.008551	0.307929	0.905901	0.975301	0.941711	0.930873	0.939386	1.08954	0.537647	0.680079	0.733062	7.18072	0.151966	0	0	0	0	0	0	0	7.48422	0	0.668852	0	0	0	0	0	0	2.07751	9.6438	0.78246	0.51318	-0.07244	0
d704	0	0	0.171365	-0.592161	0.291357	1.50073	-0.147838	-0.032572	2.06607	0.029147	0.045993	0.141937	0.080609	0.117667	-0.090313	-0.004129	1.11025	0.871639	0.983175	0.914221	1.12786	1.03748	0.819618	0.845245	0.816268	15.0863	0	0	0	0	2.86239	0	0	0	5.68222	0	0.461364	0.274196	0.954129	0	0	0	0.954129	0	0	0.84845	0.56337	-0.12228	0
d705	0	0	-0.1725	0.119224	-0.051708	0.419899	-0.007417	0.008527	1.33622	-0.097537	-0.027447	0.018881	0.053502	0.046366	-0.004469	0.071707	0.781431	0.922352	0.868847	0.967732	0.984052	1.01506	0.558065	0.581102	0.574733	8.03605	0.050865	0	0	0	0	0	0	0	7.45802	0	0.668056	0	0	0	0	0	0	1.70667	9.03616	0.79268	0.52444	-0.07931	0
d706	0	0	0.024193	-0.117935	-0.334073	0.027164	0.083256	-0.121407	0.941308	0.008066	-0.087212	0.128407	0.137729	0.148391	0.056194	0.048884	0.474345	0.908971	1.0434	0.907471	0.996908	1.06134	0.454507	0.668441	0.590431	26.1646	0.182411	0	0	0	2.82672	0	0	0	6.19142	0	0.518376	0.268683	0.460751	0	0	0	0.492694	2.2472	10.017	0.76087	0.48515	-0.04469	0
d707	0	0	-0.119061	-0.05782	-0.212254	1.02437	0.073733	-0.075979	0.609895	-0.056589	-0.0857	0.105119	0.118024	0.117221	0.050697	-0.07848	0.797291	0.92155	0.99487	0.937906	1.00488	1.05905	0.458957	0.517283	0.57714	22.7965	0.680864	0	0	0	1.43959	0	0	0	5.75525	0	0.472568	0.251595	0.470656	0	0	0	0.494622	2.03404	9.8834	0.74649	0.47402	-0.03196	0
d708	0	0	-0.189775	-0.027842	-0.281686	1.14729	-0.066561	-0.240127	1.00998	-0.120486	-0.173226	0.147024	0.179108	0.171941	-0.042655	-0.01441	0.797315	0.867817	0.830931	0.820585	1.04343	1.03547	0.545281	0.502203	0.521886	13.319	0.084982	0	0	0	0	0	0	0	6.77229	0	0.587588	0.35525	0	0	0	0	0	1.8879	9.34859	0.76667	0.5	-0.05324	0
d709	0	0	-0.240599	0.292181	-0.125778	1.78469	0.217418	0.382259	1.57972	-0.104561	-0.046747	0.07063	0.042778	0.025751	0.138618	0.025076	0.920318	0.936866	0.935188	0.948959	0.850626	1.14363	0.51552	0.561744	0.676763	8.39542	0.339889	0	0	0	0	0	0	0	7.16533	0	0.636403	0.389181	0	0	0	0	0	1.80164	9.1258	0.80606	0.52955	-0.08289	0
d710	0	0	-0.267714	0.30799	-0.113631	1.86939	0.219622	0.385355	1.71039	-0.118101	-0.042548	0.066885	0.03384	0.010411	0.141914	0.027414	0.921492	0.941572	0.93974	0.959222	0.846814	1.19743	0.506674	0.541303	0.663633	6.61852	0.309473	0	0	0	0	0	0	0	7.20976	0	0.642028	0.390223	0	0	0	0	0	1.77754	9.09838	0.81282	0.53256	-0.08676	0
d711	0	0	-0.152268	0.131756	-0.00046	0.66909	-0.057581	-0.147965	1.47193	-0.111654	-0.000371	-0.085709	-0.069171	-0.006666	-0.038253	0.015761	0.456405	1.09771	1.08575	0.983184	0.96469	0.905468	0.574526	0.516648	0.558199	4.53784	0.088579	0	0	0	0	0	0	0	7.54976	0	0.690907	0	0	0	0	0	0	1.66691	8.84615	0.79425	0.49907	-0.0626	0
d712	0	0	-0.145436	-0.001574	0.133981	0.811815	-0.004326	0.073283	0.856001	-0.07957	0.069698	0.142243	0.13962	0.186201	-0.002821	0.023238	0.69442	0.847424	0.833311	0.818847	0.981207	1.01012	0.435769	0.483347	0.539117	15.3228	0.533568	0	0	0	0.980981	0	0	0	6.7668	0	0.58713	0.228022	0.457785	0.61832	0	0	0.523196	1.89827	9.35103	0.75965	0.49407	-0.04698	0
d713	0	0	-0.022534	0.162349	0.250824	2.00501	0.169029	-0.035567	0.710234	-0.009313	0.085897	0.207918	0.242577	0.215254	0.111043	-0.066531	0.870185	0.819673	0.870202	0.81684	0.955642	1.06109	0.520114	0.526955	0.57011	19.9323	0.043079	0	0	0	1.78104	0	0	0	6.12896	0	0.50546	0.251405	0.396407	0.859643	0	0	0.509422	1.96662	9.83124	0.77018	0.49526	-0.05187	0
d714	0	0	0.151164	-0.47137	-0.142107	-0.451735	-0.31356	-0.138114	1.37329	0.087202	-0.102935	-0.030492	-0.000813	0.046035	-0.193351	-0.024453	0.542889	1.01877	0.992118	0.931925	1.11748	0.879802	0.800208	0.737142	0.638011	8.13958	0.427394	0	0	0	1.73669	0	0	0	6.99142	0	0.625264	0.39343	0.455919	0	0	0	0.824853	0	0	0.80163	0.53109	-0.08334	0
d715	0	0	0.01189	0.081423	0.239244	0.309378	-0.164291	0.140808	1.34959	0.005619	0.094657	0.027519	0.053045	0.121316	-0.104756	0.036134	0.823288	0.905317	0.939781	0.880269	1.04378	1.05959	0.636867	0.587588	0.654609	9.55586	0.131606	0	0	0	0	0	0	0	7.18212	0	0.634681	0.733522	0	0	0	0	0	1.82596	9.17421	0.80853	0.53018	-0.08317	0
d716	0	0	-0.057684	0.154889	0.079368	0.608641	-0.063856	-0.099486	1.13782	-0.018858	0.023297	0.005601	0.059424	0.102746	-0.041559	-0.046398	0.716781	0.9755	0.956585	0.910449	1.03277	1.00762	0.610998	0.581032	0.56058	10.7865	0.156732	0	0	0	0	0	0	0	6.96007	0	0.608013	0.278137	0	0	0	0	0	1.86083	9.28286	0.81698	0.53025	-0.08405	0
d717	0	0	0.30507	-0.354884	0.039161	-0.980759	-0.281371	0.049501	1.54216	0.137233	0.014931	0.020409	0.035838	0.084893	-0.175557	-0.01683	0.681613	0.936731	1.01056	0.929375	1.12697	1.04102	0.966773	0.809477	0.721532	6.79227	0.096862	0	0	0	0.859583	0	0	0	7.01266	0	0.621467	0.747203	0.859583	0	0	0	0.859583	0	0	0.83583	0.54923	-0.10377	0
d718	0	0	-0.24706	0.160817	-0.083714	2.01327	0.025774	-0.063199	0.979039	-0.100007	-0.026404	0.18011	0.152673	0.123152	0.016453	0.013623	1.05372	0.786394	0.874485	0.900989	1.00191	1.04356	0.564736	0.642695	0.764153	15.0401	0.139083	0	0	0	0	0	0	0	6.73309	0	0.573874	0.303945	0	0	0	0	0	1.85707	9.50498	0.79266	0.51217	-0.06914	0
d719	0	0	-0.186445	-0.160999	0.018089	-0.461869	-0.09174	0.054983	1.48892	-0.109041	0.009587	-0.117005	-0.024428	0.059385	-0.060016	0.057785	0.61022	1.06404	1.02431	0.963776	1.01652	1.08263	0.623683	0.630097	0.554512	7.73885	0.080097	0	0	0	0	0	0	0	7.36827	0	0.661026	0	0	0	0	0	0	1.75879	9.03043	0.8181	0.52387	-0.08245	0
d720	0	0	-0.052868	-0.005611	-0.4938	1.40188	-0.00789	0.017694	1.3219	-0.010618	-0.078914	0.070382	0.087678	0.112995	-0.005271	-0.023845	0.907328	0.914073	0.948302	0.912198	1.0122	1.00383	0.635858	0.585274	0.652956	15.7597	0	0	0	0	3.64827	0	0	0	6.8986	0	0.588109	0.418834	0.81937	-0.72445	0	0	1.00477	1.76093	9.48745	0.81951	0.5266	-0.08274	0
d721	0	0	-0.022534	0.162349	0.250824	2.00501	0.169029	-0.035567	0.710234	-0.009313	0.085897	0.207918	0.242577	0.215254	0.111043	-0.066531	0.870185	0.819673	0.870202	0.81684	0.955642	1.06109	0.520114	0.526955	0.57011	19.9323	0.043079	0	0	0	1.78104	0	0	0	6.12896	0	0.50546	0.251405	0.396407	0.859643	0	0	0.509422	1.96662	9.83124	0.77018	0.49526	-0.05187	0
d722	0	0	-0.139704	0.01723	-0.165692	0.836165	-0.043845	-0.185981	1.05148	-0.092177	-0.103678	0.077254	0.099292	0.107929	-0.028409	-0.098536	0.740146	0.947484	1.05184	0.924482	1.05696	1.10702	0.468695	0.508485	0.578245	11.2501	0.585689	0	0	0	0.941076	0	0	0	6.3843	0	0.542963	0.260897	0.456768	0	0	0	0.484308	1.9575	9.54115	0.77287	0.49741	-0.05526	0
d723	0	0	?	?	?	1.6446	0.189124	0.052412	1.60562	0	0	0.077372	0.035375	-0.090101	0.091753	-0.024656	0	0.929653	1.05972	1.24819	1.14911	0.953721	0.702355	0.843286	1.3033	13.0133	0.307845	0	0	0	2.36687	0	0	0	6.48459	0	0.543887	0.287842	0.579372	0	16.338	0	0.60406	1.88355	9.65647	0.81229	0.52211	-0.07793	0
d724	0	1	-0.217413	-0.007263	-0.05362	0.243525	-0.045401	-0.019475	0.993083	-0.127102	-0.023922	-0.118823	-0.089497	-0.015961	-0.03045	0.071341	0.588945	1.08417	1.03077	1.00532	0.982843	0.931897	0.524908	0.546482	0.521039	10.9217	0.322555	0	0	1	0	0	0	0	7.03311	0	0.617029	0.372529	0	0	0	0	0	1.81359	9.2369	0.76259	0.48733	-0.04632	0
d725	0	0	-0.114272	-0.061798	-0.082663	-0.416766	-0.054909	-0.174538	1.50869	-0.041637	-0.028469	-0.146127	-0.061486	0.03187	-0.037359	-0.014605	0.641801	1.0838	1.02674	0.993785	1.01793	1.04073	0.709834	0.650573	0.455193	6.79555	0.291101	0	0	0	0	0	0	0	7.64131	0	0.685998	0.733184	0	0	0	0	0	1.6505	9.00793	0.85812	0.55608	-0.11028	0
d726	0	0	0.160403	-0.005159	0.203087	-0.190015	-0.100307	-0.080144	?	0.080825	0.082002	-0.02094	-0.076538	0.041522	-0.136842	0	1.22611	1.15553	1.46681	0.966538	1.03926	0.900912	0	0	0	9.37913	0.038092	0	0	0	0	0	0	0	0	0	0	0	0	0	0	0	0	0	0	0.78476	0.64626	-0.20484	0
d727	0	0	-0.05816	-0.051739	-0.081168	0.680602	0.121929	-0.050522	0.850155	-0.019753	-0.025277	0.183734	0.201567	0.179779	0.083457	0.137245	1.10456	0.819303	0.870728	0.85834	0.977058	1.04443	0.624416	0.707279	0.716227	17.9458	0.203163	0	0	0	0	0	0	0	6.36439	0	0.53171	0.274558	0	0	0	0	0	1.92097	9.70066	0.79539	0.50252	-0.06198	0
d728	0	0	-0.220625	-0.075927	-0.101781	-0.233004	-0.134905	0.26236	0.817683	-0.110105	-0.03991	-0.012678	0.025326	0.112521	-0.090546	0.123637	0.662286	0.952665	0.93331	0.908689	1.02019	1.10353	0.572293	0.573187	0.605234	18.5486	0	0	0	0	0	0	0	0	6.97492	0	0.605664	0	0	0	0	0	0	1.81672	9.32939	0.74928	0.47919	-0.03316	0
d729	0	0	-0.067323	-0.195632	0.014016	-0.97057	0.012876	0.008019	1.56351	-0.035328	0.007221	-0.027377	0.119172	0.130951	0.00785	-0.036364	0.593218	0.966438	0.889266	0.924267	1.00234	0.994005	0.670746	0.706434	0.510166	5.89084	0.065007	0	0	0	0	0	0	0	7.64795	0	0.691573	0	0	0	0	0	0	1.65898	8.94656	0.84095	0.55244	-0.11103	0
d730	0	0	-0.082887	-0.18458	0.014674	-0.376593	0.076981	0.040804	1.14997	-0.035351	0.006591	0.140027	0.203613	0.166733	0.050884	0.002126	0.758483	0.843691	0.814512	0.86413	0.988193	1.00563	0.598697	0.672353	0.550044	10.4299	0.086546	0	0	0	0	0	0	0	7.47906	0	0.668585	0.273224	0	0	0	0	0	1.68576	9.05121	0.80963	0.51841	-0.07888	0
d731	0	0	-0.180671	-0.041773	-0.242121	0.532489	-0.07416	-0.221289	1.76202	-0.101855	-0.134414	0.020607	0.040426	0.040674	-0.047395	0.085619	0.779115	0.967742	0.949492	0.967994	1.03389	1.02133	0.512947	0.628404	0.655859	5.73592	0.199398	0	0	0	0	0	0	0	7.36486	0	0.661481	0.274845	0	0	0	0	0	2.33578	9.88887	0.81414	0.52928	-0.09033	0
d732	0	0	-0.077319	-0.098741	-0.031729	0.997249	0.16178	-0.056182	1.27475	-0.048649	-0.018335	0.095645	0.078401	0.087574	0.114466	0.033001	0.635253	0.89976	0.917597	0.928213	0.883295	0.912546	0.453746	0.746139	0.616153	12.4717	0.275754	1	0	0	0	0	0	0	7.14689	0	0.620849	0.246104	0	0	0	0	0	3.50825	0	0.77296	0.48297	-0.04257	0
d733	0	0	?	?	?	-0.392747	0.263706	0.239238	2.91289	0	0	-0.104405	-0.215063	-0.298913	0.093917	0.069309	0	1.11175	1.38451	1.51074	1.25742	0.925816	0.794234	0.979887	1.51874	4.35032	0.126851	0	0	0	2.28641	0	0	0	7.17334	0	0.641989	0	0.558512	0	15.4946	0	0.584694	0	0	0.85168	0.54825	-0.10425	0
d734	0	0	-0.121608	-0.049436	-0.159512	0.175922	-0.049172	0.098364	1.36398	-0.091208	-0.110967	0.006514	0.04471	0.143923	-0.031382	-0.011355	0.592497	0.936698	0.919772	0.863557	0.946348	1.10145	0.555431	0.588337	0.621301	10.3271	0.057048	0	0	0	0	0	0	0	7.24672	0	0.647174	0	0	0	0	0	0	1.81185	9.07969	0.78034	0.51049	-0.06469	0
d735	0	0	-0.051942	0.126058	-0.226869	-0.055266	-0.19096	-0.119648	1.37693	-0.018636	-0.076873	-0.130956	-0.02737	0.057436	-0.123815	-0.101913	0.678537	1.06789	1.04323	0.956054	1.08081	1.02535	0.666126	0.634396	0.590901	8.65477	0.1606	0	0	0	0	0	0	0	7.25355	0	0.644599	0.725624	0	0	0	0	0	1.79433	9.1195	0.83485	0.54514	-0.09847	0
d736	0	0	0.383036	-0.09957	0.381913	-1.06089	-0.07803	-0.099761	0.974418	0.111773	0.092064	0.183628	0.21025	0.206011	-0.053216	-0.094918	1.13966	0.796322	0.823764	0.799886	1.07343	0.839731	0.579192	0.679632	0.691697	14.2209	0.024163	0	0	0	0	0	0	0	6.20423	0	0.510319	0.346221	0	0	0	0	0	1.92047	9.84619	0.8023	0.51111	-0.0679	0
d737	0	0	-0.17531	-0.001546	-0.121274	0.108779	-0.128014	-0.150188	1.33296	-0.104866	-0.058913	0.042043	0.081396	0.122202	-0.080082	0.041757	0.934146	0.923696	0.939134	0.917556	1.05938	1.00743	0.62367	0.597859	0.631315	7.32418	0.044281	0	0	0	0.892995	0	0	0	7.28828	0	0.648363	0	0.446497	0	0	0	0.446497	1.77859	9.10761	0.80083	0.52015	-0.07729	0
d738	0	0	-0.155199	0.01447	-0.151595	0.118393	-0.164394	0.037117	1.29707	-0.113505	-0.100522	-0.00423	0.021021	0.129375	-0.105561	-0.004083	0.640952	0.94778	1.02649	0.889689	1.0221	1.02426	0.560315	0.593587	0.615389	9.59304	0.057979	0	0	0	0	0	0	0	7.23161	0	0.645025	0	0	0	0	0	0	1.80933	9.09012	0.77642	0.50561	-0.06048	0
d739	0	0	-0.082946	0.070842	-0.105346	-0.055266	-0.19096	-0.119648	1.37693	-0.032486	-0.038968	-0.130956	-0.02737	0.057436	-0.123815	-0.101913	0.649548	1.06789	1.04323	0.956054	1.08081	1.02535	0.666126	0.634396	0.590901	8.99255	0.1606	0	0	0	0	0	0	0	7.25355	0	0.644599	0.725624	0	0	0	0	0	1.79433	9.1195	0.83485	0.54514	-0.09847	0
d740	0	0	-0.404935	-0.262175	0.108559	-0.198896	0.060156	0.124674	1.03635	-0.094845	0.020962	0.120111	0.157254	0.17149	0.040288	-0.034705	0.768068	0.869981	0.869979	0.857072	0.963402	0.99684	0.576963	0.614288	0.580033	26.2163	0	0	0	0	0	0	0	0	6.34971	0	0.529178	0.297068	0	0	0	0	0	1.89455	9.71977	0.788	0.50165	-0.05981	0
d741	0	0	-0.066563	0.057091	0.178995	0.877084	-0.010589	-0.2892	1.20019	-0.040419	0.097047	0.143471	0.18703	0.115923	-0.006748	-0.037755	0.956091	0.847064	0.833743	0.916716	1.08443	1.08878	0.452592	0.486231	0.532605	9.26284	0.100403	0	0	0	0	0	0	0	6.84956	0	0.595718	0.266328	0	0	0	0	0	1.8867	9.32651	0.78829	0.51008	-0.06639	0
d742	0	0	-0.43018	0.17491	0.049706	2.07638	-0.19105	0.111835	1.64311	-0.292999	0.030657	0.022078	0.003252	0.06237	-0.117829	0.061028	0.601645	0.916404	0.963185	0.929337	1.01759	1.0005	0.773135	0.792214	0.469629	8.10848	0.038942	0	0	0	0	0	0	0	0.647075	-1.04503	0.62855	0	0	0	0	0	0	0	0	0.81143	0.53247	-0.08814	0
d743	0	0	0.095819	-0.404217	-0.258485	-0.242314	-0.141577	-0.183556	1.65519	0.052621	-0.145638	0.051871	0.052504	0.060408	-0.086524	0.027039	0.708786	0.931874	0.924708	0.931007	1.05032	0.959883	0.763008	0.781053	0.719338	7.71715	0.317688	0	0	0	0.839228	0	0	0	7.03879	0	0.630165	0.269991	0.839228	0	0	0	0.839228	2.44408	10.0725	0.8075	0.53333	-0.09048	0
d744	0	0	-0.088561	-0.037894	-0.439009	0.517493	0.035121	-0.106508	0.870959	-0.037855	-0.165291	0.090972	0.10495	0.117611	0.023432	0.100025	0.612211	0.933691	1.04881	0.929543	1.01611	1.06856	0.551476	0.733453	0.820097	20.7436	0.469366	0	0	0	1.9145	0	0	0	5.27005	0	0.589566	0.267663	0.463666	0	0	0	0.510403	2.27126	10.4644	0.76089	0.48584	-0.04366	0
d745	0	0	-0.219562	0.404928	-0.441573	1.3421	0.238792	0.306582	1.94533	-0.098546	-0.166437	0.023843	-0.008864	-0.030816	0.165157	0.374119	0.845683	0.987857	1.00837	1.00032	0.831757	1.27504	0.486159	0.489523	0.593703	3.92082	0.232522	0	0	0	0	0	0	0	7.54401	0	0.68791	0.393763	0	0	0	0	0	1.61393	8.86763	0.82473	0.53238	-0.08985	0
d746	0	0	-0.192999	-0.027025	-0.017008	0.433829	-0.151525	-0.037937	1.40753	-0.131632	-0.012023	0.028261	0.066834	0.138192	-0.099232	0.035841	0.721026	0.951831	0.872674	0.861964	1.04353	1.03849	0.480965	0.514235	0.5695	6.23626	0.234954	0	0	0	0.944257	0	0	0	7.34433	0	0.662723	0.362597	0.415964	0.553653	0	0	0.528293	1.7709	8.98277	0.77879	0.50519	-0.06014	0
d747	0	0	-0.187928	0.042685	0.040711	0.776205	-0.099946	-0.019631	0.890366	-0.104441	0.018259	0.028232	0.042025	0.058955	-0.068981	0.004469	0.643272	0.966835	0.921333	0.947249	1.05974	1.02935	0.432224	0.462647	0.508199	12.7253	0.053115	0	0	0	0.538096	0	0	0	7.04766	0	0.622044	0.257281	0.538096	0.497945	0	0	0.538096	1.81486	9.18428	0.75098	0.4811	-0.03642	0
d748	0	0	-0.054167	-0.030311	-0.060702	0.415622	0.040196	-0.172673	0.954662	-0.028641	-0.029362	0.133744	0.06666	0.06582	0.025191	-0.012989	0.655416	0.882758	0.952596	0.959349	0.993244	1.03685	0.732139	0.638022	0.527276	13.2343	0.013744	0	0	0	1.32247	0	0	0	3.67577	0	0.366595	0.241966	0.37367	0	0	0	0.485226	0	0	0.78301	0.50528	-0.06262	0
d749	0	0	0.018182	-0.058348	0.012694	0.13583	0.136378	0.0189	0.464422	0.010268	0.006494	0.08899	0.089823	0.094238	0.100808	0.003044	0.65345	0.917685	0.916604	0.921878	0.915662	0.952236	0.513343	0.787176	0.736549	22.5836	0.25589	0	0	0	0	0	0	0	6.48364	0	0.555487	0.238178	0	0	0	0	0	3.84238	0	0.72358	0.45167	-0.01269	0
d750	0	0	-0.354286	0.149794	-0.019393	1.00729	-0.089903	0.083276	1.6204	-0.115513	-0.005454	0.024408	0.065787	0.119263	-0.059163	0.077863	0.703356	0.943405	0.953356	0.895896	1.03223	1.11008	0.572311	0.582578	0.625743	13.429	0.065196	0	0	0	0	0	0	0	7.07484	0	0.619632	0.324804	0	0	0	0	0	1.78358	9.24613	0.80735	0.5201	-0.07878	0
d751	0	0	-0.202052	-0.300181	-0.011385	-0.798258	0.048201	-0.078819	1.51171	-0.105642	-0.005395	-0.126783	-0.058527	0.031249	0.032674	0.070549	0.611217	1.06776	1.02127	0.993528	0.93005	1.06088	0.674641	0.653325	0.416386	7.27035	0.080097	0	0	0	0	0	0	0	7.66888	0	0.692919	0	0	0	0	0	0	1.64471	8.95121	0.83238	0.53004	-0.08863	0
d752	0	0	-0.152217	-0.094164	-0.342626	0.407099	0.098065	0.022997	1.45519	-0.064874	-0.098921	-0.143485	-0.099471	-0.038774	0.067568	0.116339	0.932046	1.07292	1.07909	1.10054	0.945285	1.03834	0.719436	0.645278	0.432549	7.28755	0.128085	0	0	0	0	0	0	0	7.63282	0	0.685106	0	0	0	0	0	0	1.6429	9.00808	0.85812	0.54457	-0.10403	0
d753	0	0	0.030647	-0.112211	-0.035114	-0.509778	0.036373	-0.247557	1.45519	0.01299	-0.010903	-0.16008	-0.110014	-0.027446	0.025061	-0.028166	0.613471	1.09802	1.09627	1.07646	0.964515	1.08187	0.67558	0.658145	0.566018	7.28755	0.160082	0	0	0	0	0	0	0	7.63682	0	0.685998	0	0	0	0	0	0	1.64313	9.00138	0.85812	0.54457	-0.10403	0
d754	0	0	-0.147961	0.188958	0.034544	2.79441	0.090793	0.022002	0.699778	-0.050699	0.008749	0.166418	0.128819	0.094104	0.061666	-0.068025	1.27841	0.82478	0.963511	0.965173	1.00134	1.0652	0.551911	0.624529	0.767295	22.6501	0.150898	0	0	0	0	0	0	0	5.43743	0	0.431444	0.307966	0	0	0	0	0	2.02636	10.2121	0.76191	0.48302	-0.03943	0
d755	0	0	-0.552488	-0.35481	-0.310246	0.474315	0.073136	-0.083973	1.30095	-0.123303	-0.051521	-0.010846	0.011552	0.043724	0.049585	-0.09025	0.873304	0.991975	0.974415	0.981402	0.947675	1.06214	0.573406	0.701408	0.46645	18.5345	0	0	0	0	0	0	0	0	6.59605	0	0.555784	0.50795	0	0	0	0	0	1.80601	9.6013	0.79482	0.50428	-0.06255	0
d756	0	0	-0.249842	0.039659	-0.085013	0.933218	0.042477	0.000532	0.953864	-0.109371	-0.035857	0.127977	0.118856	0.113359	0.030712	-0.021067	0.938879	0.868052	0.873482	0.8814	1.00002	1.10232	0.584801	0.514377	1.20776	12.5902	0.133893	0	0	0	1.67857	0	0	0	6.3776	0	0.545836	0.268724	0.534343	0.164242	0	0	0.588099	1.92138	9.47292	0.77891	0.48773	-0.04873	0
d757	0	0	-0.313162	0.074619	0.019494	1.98169	0.060519	-0.08644	0.813045	-0.11394	0.006098	0.072842	0.113272	0.112915	0.042177	0.005602	0.709592	0.937031	0.95145	0.92628	0.991016	1.03747	0.656843	0.65654	0.644516	19.3716	0.305002	0	0	0	0	0	0	0	5.14127	1.62626	0.561966	0.272044	0	0	0	0	0	0	0	0.77381	0.48845	-0.04559	0
d758	0	0	0.040169	-0.217979	0.178518	-0.588056	0.064809	-0.050563	1.10187	0.021604	0.089885	-0.096681	-0.074988	-0.026883	0.044478	-0.00283	0.650058	1.09203	1.07275	1.04293	0.922335	1.0272	0.952758	0.552501	0.757742	7.65266	0.192202	0	0	0	0.788348	0	0	0	7.40999	0	0.684268	0	0.788348	0	0	0	0.788348	0	0	0.81048	0.50775	-0.06634	0
d759	0	0	-0.199615	-0.008185	-0.296624	0.274513	-0.075016	-0.180904	1.52605	-0.064029	-0.066914	-0.010179	-0.000458	0.039807	-0.05053	0.090209	0.495284	1.00045	1.04114	0.998878	1.06166	0.970969	0.575746	0.91042	0.756252	12.9792	0.253616	0	0	0	0	0	0	0	6.33759	0	0.53416	0.295512	0	0	0	0	0	0	0	0.80053	0.51306	-0.07069	0
d760	0	0	-0.184415	-0.037781	-0.062818	0.502005	0.076527	-0.099555	0.796216	-0.072685	-0.016506	0.113852	0.121076	0.103532	0.052823	0.020093	0.719934	0.88497	0.888733	0.953377	1.00517	1.01923	0.550572	0.51564	0.482799	17.4133	0.027896	0	0	0	0	0	0	0	6.54107	0	0.553539	0.274678	0	0	0	0	0	1.88566	9.5761	0.76869	0.48747	-0.044	0
d761	0	0	0.130377	-0.437403	-0.240964	-0.262382	-0.099576	-0.067318	1.18774	0.079348	-0.127728	0.097735	0.087853	0.128664	-0.062865	-0.016142	0.497419	0.893935	0.97796	0.890101	1.03201	1.0385	0.844787	0.761953	0.642497	11.4085	0.095517	0	0	0	0.829451	0	0	0	6.81316	0	0.601649	0.267965	0.829451	0	0	0	0.829451	0	0	0.78865	0.5107	-0.06719	0
d762	0	0	-0.103993	-0.027281	0.170582	0.379976	-0.107686	0.344708	1.28948	-0.062678	0.114988	0.120783	0.131119	0.219042	-0.068353	0.022497	0.631875	0.871217	0.817283	0.798432	1.00308	1.04803	0.442467	0.498274	0.568363	9.89107	0.40911	0	0	0	0	0	0	0	7.17779	0	0.639227	0.32567	0	0.641498	0	0	0	1.83577	9.10834	0.77833	0.51742	-0.06648	0
d763	0	0	-0.14873	-0.162531	-0.04607	-0.954423	-0.113577	0.03946	1.38153	-0.070953	-0.017798	-0.071206	0.025063	0.083605	-0.071237	0.045179	0.737864	1.00417	0.991917	0.96783	1.05108	1.05594	0.666966	0.667368	0.604253	9.27614	0.097171	0	0	0	0	0	0	0	7.30335	0	0.648828	0	0	0	0	0	0	1.77278	9.11825	0.83254	0.5405	-0.09813	0
d764	0	0	-0.112392	-0.002592	-0.175496	0.374517	-0.191066	-0.141324	1.19934	-0.078088	-0.10967	0.00059	0.068553	0.101342	-0.123369	0.000722	0.601923	0.978364	0.979187	0.906876	1.10632	1.01572	0.537184	0.551577	0.551298	11.2959	0.147107	0	0	0	0	0	0	0	6.91519	0	0.604708	0.436473	0	0	0	0	0	1.86494	9.27403	0.77121	0.50327	-0.0566	0
d765	0	0	-0.084703	-0.395995	0.37269	-0.869603	0.052623	0.065333	1.89912	-0.026568	0.117935	0.069767	0.057445	0.06414	0.038002	-0.037856	0.986938	0.910248	0.934852	0.957483	0.964952	1.03413	0.664583	0.917032	0.761642	10.7788	0.277615	0	0	0	0	0	0	0	6.95395	0	0.595971	0.28039	0	0	0	0	0	0	0	0.82811	0.52444	-0.08376	0
d766	0	0	-0.415279	0.682256	-0.566307	3.70781	0.237221	0.265816	2.33915	-0.149495	-0.171907	0.012191	-0.011415	-0.039455	0.171296	0.389414	0.751664	1.00136	1.01293	1.0297	0.844972	1.30307	0.532472	0.45638	0.646518	3.41563	0.282936	0	0	0	0	0	0	0	7.51785	6.11658	0.682285	0.399423	0	0	0	0	0	0	0	0.85625	0.54722	-0.105	0
d767	0	0	-0.221777	0.367999	0.078443	1.34298	0.231155	0.265889	1.83899	-0.099366	0.029753	0.022731	-0.008216	-0.02913	0.160236	0.015591	0.795319	0.985884	1.00599	1.00099	0.838619	1.28492	0.495816	0.503925	0.60667	4.40321	0.247416	0	0	0	0	0	0	0	7.62666	0	0.702545	0.39081	0	0	0	0	0	1.6138	8.78138	0.81717	0.52456	-0.08263	0
d768	0	0	-0.099561	-0.033204	-0.173204	0.617421	-0.073527	-0.000153	1.08758	-0.058868	-0.100995	0.138897	0.152006	0.203041	-0.048405	-0.012232	0.552731	0.858757	0.903965	0.826373	1.04263	1.11183	0.432351	0.479834	0.539613	10.6783	0.653046	0	0	0	0	0	0	0	6.91053	0	0.605433	0.263596	0	0.620734	0	0	0	1.85941	9.2572	0.76667	0.49868	-0.05167	0
d769	0	0	-0.099556	-0.03316	-0.176466	0.83338	-0.015875	0.063022	0.918301	-0.055453	-0.097203	0.139966	0.153968	0.183837	-0.0107	0.004835	0.566829	0.861855	0.895816	0.840624	1.01809	1.07658	0.421915	0.468808	0.524461	13.0189	0.670898	0	0	0	0	0	0	0	6.76395	0	0.587442	0.227602	0	0.618824	0	0	0	1.88087	9.33925	0.7585	0.4888	-0.04361	0
d770	0	0	-0.233888	0.022772	-0.262789	0.391693	-0.014006	0.009463	0.70933	-0.093257	-0.088681	0.081731	0.087787	0.148012	-0.00895	-0.036285	0.910611	0.91423	0.966385	0.921004	1.0662	1.09741	0.469413	0.523455	0.56933	18.6744	0.164215	0	0	0	0	0	0	0	6.84516	0	0.594212	0.270703	0	0	0	0	0	1.85924	9.34022	0.77353	0.49634	-0.05467	0
d771	0	0	-0.217616	-0.28914	-0.010593	-0.306986	0.094558	-0.009551	1.12178	-0.094177	-0.004584	0.069619	0.086373	0.111566	0.067027	0.084666	0.78697	0.915087	0.906872	0.910833	0.936805	1.0533	0.611705	0.636834	0.472431	10.5967	0.085344	0	0	0	0	0	0	0	7.49996	0	0.66993	0.273937	0	0	0	0	0	1.67149	9.05585	0.80296	0.5039	-0.06437	0
d772	0	0	-0.082887	-0.18458	0.014674	-0.376593	0.076981	0.040804	1.14997	-0.035351	0.006591	0.140027	0.203613	0.166733	0.050884	0.002126	0.758483	0.843691	0.814512	0.86413	0.988193	1.00563	0.598697	0.672353	0.550044	9.79184	0.086546	0	0	0	0	0	0	0	7.47906	0	0.668585	0.273224	0	0	0	0	0	1.68576	9.05121	0.80963	0.51841	-0.07888	0
d773	0	0	-0.162033	0.049337	0.11848	0.833499	-0.039932	0.098674	0.867967	-0.067342	0.043614	0.097228	0.109571	0.137132	-0.025857	-0.059416	1.08318	0.866402	0.865466	0.869259	1.00268	1.01876	0.600495	0.620778	0.651053	18.619	0.133484	0	0	0	0	0	0	0	6.39724	0	0.533357	0.286039	0	0	0	0	0	1.92521	9.72057	0.7796	0.50083	-0.05597	0
d774	0	0	-0.351588	-0.017906	-0.103684	0.159392	-0.126039	0.152495	1.95546	-0.137568	-0.037262	0.006903	0.064772	0.1425	-0.080596	0.084765	0.632811	0.961175	0.963665	0.873906	1.03962	1.11591	0.566704	0.587549	0.600418	10.4379	0	0	0	0	0	0	0	0	7.20736	0	0.63828	0.320488	0	0	0	0	0	1.7669	9.14482	0.81597	0.53146	-0.09029	0
d775	0	0	-0.767528	0.309488	-0.469742	3.62237	-0.110344	0.259146	1.82805	-0.315953	-0.185008	0.048193	0.016907	0.062603	-0.067539	0.095481	0.774365	0.933551	0.880094	0.889724	0.967527	0.968906	0.802011	0.801386	0.584657	4.40936	0	0	0	0	0	0	0	0	1.34011	6.08745	0	0.263579	0	0	0	0	0	0	0	0.83659	0.55	-0.10983	0
d776	0	0	0.233746	-0.651333	0.128096	-0.955345	-0.020026	-0.010215	2.05386	0.075208	0.036945	-0.017526	-0.057082	-0.034317	-0.0114	-0.157483	0.668345	1.00098	1.09569	1.02825	1.01201	1.0413	0.951877	0.719175	0.85062	7.68527	0.705588	0	0	0	3.39704	0	0	0	6.44554	0	0.551723	0.31995	0.822507	-0.358074	0	0	0.876014	0	0	0.84909	0.58491	-0.13921	0
d777	0	0	-0.293355	0.321181	-0.174774	1.96153	0.215716	0.32701	1.86936	-0.13104	-0.065678	0.058527	0.01287	-0.012952	0.142726	0.111201	0.831651	0.951919	0.963623	0.979064	0.848675	1.26142	0.496658	0.518671	0.64751	4.84162	0.264792	0	0	0	0	0	0	0	7.27077	0	0.649106	0.392751	0	0	0	0	0	1.73199	9.06828	0.82157	0.53644	-0.09176	0
d778	0	0	-0.233951	0.174408	-0.164214	1.57811	0.20339	0.238336	1.65885	-0.098333	-0.059391	0.086396	0.074425	-0.009561	0.125393	0.074797	0.883825	0.926207	0.867914	0.959917	0.873399	1.19078	0.505613	0.530875	0.685874	6.56172	0.289071	0	0	0	0	0	0	0	7.19935	0	0.635712	0.406988	0	0	0	0	0	1.77216	9.17161	0.82093	0.5383	-0.09129	0
d779	0	0	-0.219562	0.404928	-0.441573	1.3421	0.238792	0.306582	1.94533	-0.098546	-0.166437	0.023843	-0.008864	-0.030816	0.165157	0.374119	0.845683	0.987857	1.00837	1.00032	0.831757	1.27504	0.486159	0.489523	0.593703	3.92082	0.232522	0	0	0	0	0	0	0	7.54401	0	0.68791	0.393763	0	0	0	0	0	1.61393	8.86763	0.82473	0.53238	-0.08985	0
d780	0	0	-0.219562	0.404928	-0.441573	1.3421	0.238792	0.306582	1.94533	-0.098546	-0.166437	0.023843	-0.008864	-0.030816	0.165157	0.374119	0.845683	0.987857	1.00837	1.00032	0.831757	1.27504	0.486159	0.489523	0.593703	3.92082	0.232522	0	0	0	0	0	0	0	7.54401	0	0.68791	0.393763	0	0	0	0	0	1.61393	8.86763	0.82473	0.53238	-0.08985	0
d781	0	0	-0.186119	0.225687	-0.012318	1.31224	0.223984	0.319136	1.77205	-0.082687	-0.004616	0.04271	0.032224	0.000536	0.149035	0.034697	0.876428	0.960831	0.904281	0.958275	0.846434	1.30018	0.497842	0.525047	0.631969	5.37872	0.277712	0	0	0	0	0	0	0	7.33956	0	0.660072	0.390355	0	0	0	0	0	1.73169	9.00452	0.81482	0.52881	-0.08481	0
d782	0	0	-0.23284	0.37253	-0.532724	1.58044	0.195542	0.280813	1.30697	-0.091059	-0.164124	0.051432	0.016673	0.033109	0.130791	0.321324	0.903265	0.950775	1.03071	0.973847	0.874796	1.17044	0.506213	0.552971	0.6082	9.804	0.165074	0	0	0	0	0	0	0	6.32869	0	0.524744	0.322674	0	0	0	0	0	1.85369	9.75902	0.78889	0.50952	-0.06276	0
d783	0	0	-0.15031	0.068195	-0.099149	0.450341	-0.077465	0.022929	1.13376	-0.090613	-0.044415	0.04666	0.071189	0.129593	-0.05346	-0.053785	0.783432	0.916804	0.891021	0.879404	1.00428	1.09142	0.475589	0.497581	0.464315	9.26085	0.274804	0	0	0	0.61166	0	0	0	6.75813	0	0.578764	0.415765	0.61166	0.345497	0	0	0.61166	1.84926	9.45927	0.75426	0.48603	-0.03902	0
d784	0	0	-0.182366	0.273757	0.091181	0.262575	-0.33926	-0.004865	1.81838	-0.084908	0.036172	-0.000621	0.047144	0.112228	-0.206887	-0.121257	0.941642	0.956795	0.96837	0.912152	1.20656	1.00087	0.627522	0.891986	1.174	7.06457	0.264377	0	0	0	0.593371	0	0	0	6.09282	1.14154	0.505843	0.409231	0.593371	0.262246	0	0	0.593371	0	0	0.82992	0.55203	-0.10624	0
d785	0	0	0.04889	-0.256268	-0.216684	-0.154874	-0.320375	-0.241778	1.15213	0.024602	-0.070323	-0.068092	-0.048811	0.009326	-0.197445	0.009403	0.712182	0.961446	0.95365	0.98602	1.16156	1.03793	0.814857	0.703906	0.553493	11.1172	0.361269	0	0	0	0.843313	0	0	0	6.80366	0	0.597473	0.453868	0.843313	0	0	0	0.843313	0	0	0.794	0.52054	-0.07128	0
d786	0	0	0.04889	-0.256268	-0.216684	-0.154874	-0.320375	-0.241778	1.15213	0.024602	-0.070323	-0.068092	-0.048811	0.009326	-0.197445	0.009403	0.712182	0.961446	0.95365	0.98602	1.16156	1.03793	0.814857	0.703906	0.553493	11.1172	0.361269	0	0	0	0.843313	0	0	0	6.80366	0	0.597473	0.453868	0.843313	0	0	0	0.843313	0	0	0.794	0.52054	-0.07128	0
d787	0	0	0.105902	-0.253592	-0.065669	0.030803	0.09466	-0.082697	?	0.097189	-0.067684	-0.019097	0.031628	-0.025702	0.127153	0	0.847654	0.707768	0.727859	0.697815	0.673996	1.33809	0	0	0	11.4167	0	0	0	0	0	0	0	0	0	0	0	0	0	0	0	0	0	0	0	0.76026	0.58492	-0.13913	0
d788	0	0	-0.014034	0.151175	0.55262	-0.135686	-0.204051	0.054853	1.76904	-0.003528	0.116999	0.048907	0.103325	0.134696	-0.133648	-0.057481	0.816419	0.941031	1.00744	0.908944	1.14779	1.08475	0.621152	0.572393	0.615762	11.7621	0	0	0	0	0	0	0	0	7.01234	0	0.601585	0.288923	0	0	0	0	0	1.78349	9.43141	0.84885	0.55467	-0.11146	0
d789	0	0	-0.155574	0.021474	-0.089189	0.469817	-0.303822	0.10872	1.08179	-0.092785	-0.044121	0.000849	0.026191	0.073514	-0.205065	0.107685	0.594384	0.978518	0.95056	0.929193	1.17	1.08938	0.436638	0.45468	0.497225	10.1729	0.12283	0	0	0	0.55545	0	0	0	7.03502	0	0.619898	0.309276	0.55545	0.488605	0	0	0.55545	1.82657	9.20047	0.76047	0.49223	-0.04522	0
d790	0	0	0.042462	-0.071206	0.078655	-0.694836	-0.045822	-0.007215	1.03574	0.028329	0.053135	0.029047	0.077426	0.069944	-0.029458	0.007751	0.615733	0.942256	0.860913	0.925018	0.987692	1.03284	0.538394	0.837153	0.747737	7.8788	0.1574	0	0	0	0.988904	0	0	0	7.29928	0	0.656301	0.383373	0.425872	0.529566	0	0	0.563032	3.26472	0	0.77692	0.50667	-0.0581	0
d791	0	0	-0.1509	0.076522	0.127626	1.05744	0.112492	-0.03972	0.679604	-0.065588	0.043145	0.134394	0.134479	0.116974	0.082056	0.037625	1.00606	0.878512	0.881002	0.912918	0.954657	1.0161	0.4452	0.486592	0.450993	18.874	0.101968	0	0	0	0	0	0	0	5.85611	0	0.475718	0.238243	0	0.517183	0	0	0	1.96985	9.97468	0.74627	0.47086	-0.02906	0
d792	0	0	-0.276235	0.174961	-0.124463	1.10603	-0.011348	0.100579	1.01997	-0.17007	-0.059344	0.193028	0.184279	0.194188	-0.007691	0.01488	0.698739	0.80668	0.804931	0.814333	0.982698	1.15972	0.57255	0.416514	1.0888	12.0806	0.077775	0	0	0	1.10821	0	0	0	6.59513	0	0.56614	0.408577	0.527488	0	0	0	0.580723	1.87482	9.4389	0.75694	0.48127	-0.03798	0
d793	0	0	-0.229388	0.022114	-0.194954	0.912842	-0.070859	-0.161052	1.14611	-0.096989	-0.057487	0.006599	0.009076	0.050666	-0.047596	0.077657	0.610584	0.982181	1.02975	0.986963	1.05834	0.983201	0.611483	0.975847	0.831797	13.281	0.191846	0	0	0	0	0	0	0	6.35724	0	0.537889	0.28675	0	0	0	0	0	0	0	0.78	0.49862	-0.05576	0
d794	0	0	-0.176453	-0.260426	-0.075476	-0.166496	0.132109	0.039679	0.765218	-0.062212	-0.02474	0.140948	0.175744	0.172255	0.089284	-0.046209	0.939206	0.865681	0.90546	0.868874	0.947508	1.05051	0.605292	0.652293	0.62993	20.5002	0.292858	0	0	0	0.544241	0	0	0	5.97024	0	0.490024	0.275797	0.544241	0	0	0	0.544241	2.01247	9.88212	0.77991	0.49463	-0.05219	0
d795	0	0	-0.121853	0.47583	-0.213129	2.15782	0.144128	0.357939	1.49764	-0.038563	-0.05535	0.058814	0.014917	-0.003692	0.095205	0.1105	0.969238	0.960541	1.03306	0.997536	0.916202	1.16759	0.570666	0.561688	0.637633	7.56271	0.29391	0	0	0	0	0	0	0	7.25436	0	0.641776	0.401705	0	0	0	0	0	1.73597	9.15033	0.82109	0.53642	-0.08905	0
d796	0	0	-0.143796	-0.114381	-0.199728	0.421276	0.002637	-0.122872	0.959937	-0.073133	-0.091021	0.077244	0.101543	0.143411	0.001782	-0.082021	0.638146	0.942462	1.01795	0.905537	1.02563	1.12045	0.466793	0.518139	0.539624	11.9792	0.533924	0	0	0	1.5043	0	0	0	6.28268	0	0.53063	0.266366	0.469635	0.52596	0	0	0.543121	1.96205	9.60573	0.77415	0.49524	-0.05217	0
d797	0	0	-0.143796	-0.114381	-0.199728	0.421276	0.002637	-0.122872	0.959937	-0.073133	-0.091021	0.077244	0.101543	0.143411	0.001782	-0.082021	0.638146	0.942462	1.01795	0.905537	1.02563	1.12045	0.466793	0.518139	0.539624	11.9792	0.533924	0	0	0	1.5043	0	0	0	6.28268	0	0.53063	0.266366	0.469635	0.52596	0	0	0.543121	1.96205	9.60573	0.77415	0.49524	-0.05217	0
d798	0	0	-0.16417	0.05504	-0.192915	0.89385	0.113534	-0.015451	0.884886	-0.093961	-0.099522	0.096778	0.103265	0.125447	0.080049	0.077174	0.781795	0.898407	0.8903	0.882714	0.917679	0.936664	0.47077	0.52684	0.494594	12.8151	0.256195	0	0	0	0	0	0	0	7.30316	0	0.649703	0.243683	0	0	0	0	0	3.56638	9.09923	0.74321	0.46854	-0.02828	0
d799	0	0	0.013632	0.059968	-0.106147	0.308259	-0.204584	0.030931	1.39397	0.006639	-0.042155	0.032789	0.058155	0.124822	-0.131963	0.008661	0.744018	0.909954	1.01438	0.899635	1.08664	1.0976	0.641048	0.586153	0.643434	8.34116	0.094592	0	0	0	0	0	0	0	7.22918	0	0.638925	0.741191	0	0	0	0	0	1.79638	9.16789	0.81	0.52667	-0.08121	0
d800	0	0	-0.186119	0.225687	-0.012318	1.31224	0.223984	0.319136	1.77205	-0.082687	-0.004616	0.04271	0.032224	0.000536	0.149035	0.034697	0.876428	0.960831	0.904281	0.958275	0.846434	1.30018	0.497842	0.525047	0.631969	5.37872	0.277712	0	0	0	0	0	0	0	7.33956	0	0.660072	0.390355	0	0	0	0	0	1.73169	9.00452	0.81482	0.52881	-0.08481	0
d801	0	0	-0.186119	0.225687	-0.012318	1.31224	0.223984	0.319136	1.77205	-0.082687	-0.004616	0.04271	0.032224	0.000536	0.149035	0.034697	0.876428	0.960831	0.904281	0.958275	0.846434	1.30018	0.497842	0.525047	0.631969	5.37872	0.277712	0	0	0	0	0	0	0	7.33956	0	0.660072	0.390355	0	0	0	0	0	1.73169	9.00452	0.81482	0.52881	-0.08481	0
d802	0	0	-0.186119	0.225687	-0.012318	1.31224	0.223984	0.319136	1.77205	-0.082687	-0.004616	0.04271	0.032224	0.000536	0.149035	0.034697	0.876428	0.960831	0.904281	0.958275	0.846434	1.30018	0.497842	0.525047	0.631969	5.37872	0.277712	0	0	0	0	0	0	0	7.33956	0	0.660072	0.390355	0	0	0	0	0	1.73169	9.00452	0.81482	0.52881	-0.08481	0
d803	0	0	-0.267714	0.30799	-0.113631	1.86939	0.219622	0.385355	1.71039	-0.118101	-0.042548	0.066885	0.03384	0.010411	0.141914	0.027414	0.921492	0.941572	0.93974	0.959222	0.846814	1.19743	0.506674	0.541303	0.663633	6.61852	0.309473	0	0	0	0	0	0	0	7.20976	0	0.642028	0.390223	0	0	0	0	0	1.77754	9.09838	0.81282	0.53256	-0.08676	0
d804	0	0	-0.059441	0.126861	0.107743	-0.034036	-0.057908	-0.037944	1.30036	-0.020412	0.036347	-0.128772	-0.015146	0.056605	-0.036685	-0.101139	0.773555	1.04838	0.910555	0.91464	0.97743	1.01916	0.658057	0.63909	0.603022	11.0842	0.00287	0	0	0	0	0	0	0	7.1596	0	0.633559	0.723983	0	0	0	0	0	1.83927	9.16473	0.82933	0.54969	-0.10043	0
d805	0	0	0.143831	0.008589	0.045642	0.790561	0.06073	0.176709	0.802356	0.038174	0.009186	0.200397	0.210245	0.188509	0.039386	-0.02686	1.12063	0.779068	0.766939	0.794651	0.95613	0.984525	0.576052	0.686937	0.692262	18.483	0.047399	0	0	0	0	0	0	0	6.47858	0	0.545623	0.294765	0	0	0	0	0	1.9065	9.62431	0.79536	0.51384	-0.06955	0
d806	0	0	0.140301	-0.080738	0.107721	1.18696	0.028064	0.162951	0.675172	0.035622	0.022265	0.162093	0.154706	0.152222	0.018356	-0.038626	1.17714	0.822411	0.83411	0.841104	0.980471	0.981072	0.571949	0.705503	0.716253	22.8557	0.254872	0	0	0	0	0	0	0	6.34315	0	0.530493	0.252852	0	0	0	0	0	1.92467	9.69291	0.78674	0.50483	-0.0623	0
d807	0	0	-0.151036	0.022927	0.208425	1.23033	0.049851	-0.171549	0.486702	-0.056557	0.044436	0.133379	0.144342	0.151939	0.034098	-0.034039	0.732933	0.875444	0.817402	0.859665	0.975591	1.02495	0.46698	0.496957	0.517274	32.3824	0.220335	0	0	0	0	0	0	0	5.92957	0	0.486586	0.281615	0	0	0	0	0	1.99386	9.88387	0.73784	0.47173	-0.02616	0
d808	0	0	-0.069493	0.115732	-0.160522	0.246525	-0.21338	0.052005	1.2897	-0.034621	-0.066063	0.018732	0.035746	0.112864	-0.136934	0.016984	0.832737	0.918372	1.03905	0.903883	1.07758	1.05766	0.640376	0.595077	0.643027	9.36424	0.0692	0	0	0	0	0	0	0	7.18518	0	0.635478	0.734824	0	0	0	0	0	1.81256	9.16492	0.8037	0.52442	-0.07808	0
d809	0	0	-0.19995	-0.128243	0.042123	-0.468343	0.04493	0.147971	1.22308	-0.102664	0.020202	0.059193	0.10848	0.150416	0.030331	0.069718	0.65844	0.915004	0.910648	0.881619	0.965148	1.14228	0.617965	0.656219	0.639869	10.0794	0.126338	0	0	0	0	0	0	0	7.25432	0	0.64595	0.310985	0	0	0	0	0	1.77646	9.09908	0.80081	0.50741	-0.06724	0
d810	0	0	0.152976	-0.850302	-0.26591	-1.00522	-0.184126	-0.179446	1.96803	0.056938	-0.091623	-0.01108	0.008317	0.048946	-0.111384	-0.010313	0.616101	1.00143	0.971412	0.936456	1.03988	0.983776	0.954125	0.838181	0.707156	9.77025	0	0	0	0	1.67667	0	0	0	6.98102	0	0.621703	0	0.838338	0	0	0	0.838338	0	0	0.82983	0.55167	-0.10827	0
d811	0	0	-0.162017	-0.269133	-0.059568	0.051007	0.127237	0.017339	0.678457	-0.054598	-0.018144	0.149316	0.178878	0.175963	0.086052	-0.027665	0.922947	0.865604	0.926303	0.870238	0.960255	1.0544	0.603123	0.651213	0.63711	24.3515	0.373264	0	0	0	1.04773	0	0	0	5.74026	0	0.466145	0.274709	0.507284	0	0	0	0.540442	2.04632	9.99045	0.77262	0.48995	-0.04758	0
d812	0	0	-0.19978	-0.192885	0.19961	-0.547108	0.101318	0.015412	0.808645	-0.076216	0.06847	0.100607	0.131079	0.169412	0.06618	-0.03737	0.87269	0.870942	0.867087	0.851627	0.907668	1.0714	0.61282	0.630478	0.622216	19.31	0.690457	0	0	0	0	0	0	0	6.48538	0	0.542941	0.277706	0	0	0	0	0	1.9174	9.68073	0.77489	0.49586	-0.05058	0
d813	0	0	-0.267714	0.30799	-0.113631	1.86939	0.219622	0.385355	1.71039	-0.118101	-0.042548	0.066885	0.03384	0.010411	0.141914	0.027414	0.921492	0.941572	0.93974	0.959222	0.846814	1.19743	0.506674	0.541303	0.663633	6.61852	0.309473	0	0	0	0	0	0	0	7.20976	0	0.642028	0.390223	0	0	0	0	0	1.77754	9.09838	0.81282	0.53256	-0.08676	0
d814	0	0	-0.267714	0.30799	-0.113631	1.86939	0.219622	0.385355	1.71039	-0.118101	-0.042548	0.066885	0.03384	0.010411	0.141914	0.027414	0.921492	0.941572	0.93974	0.959222	0.846814	1.19743	0.506674	0.541303	0.663633	6.61852	0.309473	0	0	0	0	0	0	0	7.20976	0	0.642028	0.390223	0	0	0	0	0	1.77754	9.09838	0.81282	0.53256	-0.08676	0
d815	0	0	0.117353	-0.411505	-0.127468	-0.169297	-0.136796	-0.283611	1.79815	0.066718	-0.077409	0.072358	0.06586	0.05416	-0.08228	-0.046977	0.684626	0.921681	0.929665	0.938794	1.06267	0.939757	0.775507	0.805505	0.756352	6.56395	0.216591	0	0	0	0.836036	0	0	0	7.07332	0	0.635566	0.267425	0.836036	0	0	0	0.836036	2.44361	10.0192	0.81944	0.54286	-0.10168	0
d816	0	0	0.04504	0.117105	0.040867	0.588742	-0.125266	0.042744	1.27161	0.018197	0.015076	0.105485	0.094097	0.142202	-0.083611	0.050404	0.80129	0.897601	0.991791	0.892175	1.07528	1.05649	0.525937	0.472638	0.499435	7.84366	0.261351	0	0	0	0	0	0	0	7.27382	0	0.645211	0.355578	0	0.551072	0	0	0	1.74913	9.1295	0.79841	0.5227	-0.0727	0
d817	0	0	-0.106604	-0.070174	-0.157312	0.339359	-0.073338	0.226657	1.28948	-0.064527	-0.106496	0.121603	0.111008	0.215451	-0.04655	0.01477	0.582798	0.880094	0.877642	0.812028	0.980619	1.11519	0.45411	0.493433	0.569118	9.34866	0.439067	0	0	0	0	0	0	0	7.18926	0	0.640701	0.325303	0	0.645137	0	0	0	1.8254	9.10064	0.77833	0.51742	-0.06648	0
d818	0	0	-0.288574	-0.224391	-0.143058	0.226695	-0.02063	-0.036328	1.34474	-0.09441	-0.037776	-0.012472	0.012358	0.067821	-0.014041	-0.005387	0.955505	0.970021	0.960006	0.978423	1.02228	1.08083	0.658704	0.8771	0.803439	11.8851	0.056021	0	0	0	0	0	0	0	7.20228	0	0.635481	0.380087	0	0	0	0	0	1.71018	9.16909	0.79394	0.50633	-0.06285	0
d819	0	0	-0.192614	-0.105882	-0.001411	-0.185187	-0.020958	0.009141	1.08744	-0.095227	-0.000541	-0.049367	0.003752	0.073671	-0.014614	0.02758	0.647931	0.98577	0.93977	0.908196	0.953274	1.06415	0.598706	0.605946	0.483293	11.4631	0.241817	0	0	0	0	0	0	0	7.21182	0	0.634473	0	0	0	0	0	0	3.52537	9.20037	0.77436	0.49271	-0.04826	0
d820	0	0	-0.200039	0.131206	0.073579	0.986198	-0.046276	0.004479	0.8802	-0.083231	0.026752	0.083181	0.072442	0.093694	-0.029143	-0.050901	1.06577	0.868036	0.853852	0.894556	0.993164	0.958182	0.596895	0.614967	0.65531	18.936	0.260356	0	0	0	0	0	0	0	6.33591	0	0.526345	0.285639	0	0	0	0	0	1.94129	9.75741	0.78502	0.51181	-0.06422	0
d821	0	0	-0.042197	0.107819	0.030671	0.357247	0.155135	0.02646	0.748957	-0.020571	0.011281	0.158576	0.119069	0.029677	0.098795	0.124216	1.16139	0.774992	0.819731	1.0514	1.0001	1.04519	0.693257	0.728144	0.682695	14.97	0.054928	0	0	0	0	0	0	0	5.85781	0	0.474445	0.281385	0	0	0	0	0	0	0	0.77	0.49859	-0.05225	0
d822	0	0	-0.303181	0.236484	-0.043184	1.63554	0.049228	-0.058664	0.591792	-0.076498	-0.009147	0.136169	0.160406	0.166257	0.032146	-0.041731	1.14542	0.841931	0.825786	0.848732	0.969878	0.99683	0.662931	0.676931	0.715068	33.7998	0.082551	0	0	0	0	0	0	0	5.92262	0	0.479841	0.285781	0	0	0	0	0	1.98445	10.0039	0.77288	0.49511	-0.04852	0
d823	0	0	-0.171799	-0.274542	-0.032268	0.074723	0.116733	0.023819	0.678457	-0.057891	-0.009828	0.158731	0.186443	0.184542	0.078948	-0.088911	0.867583	0.856245	0.918783	0.861711	0.969281	1.05871	0.60524	0.643637	0.63183	24.3515	0.150378	0	0	0	1.0426	0	0	0	6.05272	0	0.500551	0.2754	0.514967	0	0	0	0.527634	1.9859	9.80807	0.77262	0.48995	-0.04758	0
d824	0	0	0.017727	0.033378	-0.117802	0.75349	0.095776	0.014288	0.412513	0.007472	-0.034231	0.124405	0.123606	0.091574	0.068628	0.063877	0.760556	0.890543	0.874681	0.930189	0.956936	0.97154	0.469129	0.653837	0.599453	29.6868	0.474083	0	0	0	0	0	0	0	6.40824	0	0.54193	0.240968	0	0.553991	0	0	0	3.86987	0	0.72941	0.46283	-0.01916	0
d825	0	0	-0.286439	0.333519	-0.011372	1.89484	0.228445	0.405489	1.51731	-0.117448	-0.004023	0.096727	0.069317	0.011081	0.140189	0.088441	0.870607	0.92186	0.881546	0.944941	0.852179	1.15302	0.531247	0.591476	0.712429	8.0479	0.300161	0	0	0	0	0	0	0	7.22282	0	0.638235	0.399896	0	0	0	0	0	3.44374	9.16687	0.80933	0.52943	-0.08237	0
d826	0	0	0.037406	-0.036655	-0.170433	0.120311	0.129089	0.029402	0.536588	0.015726	-0.058154	0.133362	0.13747	0.092637	0.09069	0.073991	0.850758	0.864013	0.842627	0.919179	0.924504	0.96017	0.505101	0.741049	0.647575	21.9144	0.239829	0	0	0	0	0	0	0	6.64958	0	0.569989	0.240876	0	0.568143	0	0	0	3.78466	0	0.74708	0.47447	-0.03033	0
d827	0	0	0.037406	-0.036655	-0.170433	0.120311	0.129089	0.029402	0.536588	0.015726	-0.058154	0.133362	0.13747	0.092637	0.09069	0.073991	0.850758	0.864013	0.842627	0.919179	0.924504	0.96017	0.505101	0.741049	0.647575	22.5505	0.239829	0	0	0	0	0	0	0	6.64958	0	0.569989	0.240876	0	0.568143	0	0	0	3.78466	0	0.74708	0.47447	-0.03033	0
d828	0	0	-0.089774	0.175443	-0.164988	0.028677	-0.09958	-0.089358	1.33739	-0.031492	-0.054473	-0.111649	0.057945	0.078515	-0.063653	-0.048232	0.682134	1.04095	0.925735	0.917507	1.01694	1.03841	0.666814	0.626774	0.593612	8.78465	0.03686	0	0	0	0	0	0	0	7.14695	0	0.630183	0.725711	0	0	0	0	0	1.82336	9.1935	0.83192	0.54753	-0.09949	0
d829	0	0	-0.02257	0.103339	-0.248652	-0.068484	-0.110413	-0.189171	1.30036	-0.007733	-0.082245	-0.10431	0.010981	0.081356	-0.069946	-0.097916	0.706886	1.02284	0.919035	0.896897	1.00841	0.986442	0.657494	0.642404	0.599674	11.0842	0.02221	0	0	0	0	0	0	0	7.12472	0	0.628283	0.724704	0	0	0	0	0	1.83715	9.19531	0.82933	0.54969	-0.10043	0
d830	0	0	-0.156016	-0.131483	0.113032	-0.458304	-0.054014	0.068384	1.4376	-0.084491	0.057039	-0.112603	-0.010446	0.062613	-0.034549	-0.055993	0.62297	1.0445	0.921242	0.930487	0.97736	1.05215	0.616805	0.633935	0.564933	8.56737	0.184263	0	0	0	0	0	0	0	7.28636	0	0.650865	0	0	0	0	0	0	1.79982	9.07495	0.81579	0.52791	-0.08451	0
d831	0	0	-0.239699	-0.119854	-0.060122	0.11708	0.048007	-0.002357	1.16575	-0.0643	-0.01352	0.083234	0.109707	0.115194	0.031557	0.048154	0.770621	0.894441	0.911138	0.935894	0.995343	1.03956	0.54227	0.588597	0.587317	21.4939	0.05911	0	0	0	0	0	0	0	6.77411	0	0.581142	0.281666	0	0	0	0	0	1.8304	9.44116	0.78706	0.50495	-0.06269	0
d832	0	0	-0.142362	-0.017406	-0.169416	0.694145	-0.054308	-0.194725	0.982924	-0.086067	-0.100709	0.061124	0.085838	0.119215	-0.036673	-0.091864	0.637189	0.968438	1.0476	0.92713	1.06501	1.06874	0.435948	0.484476	0.542644	10.6587	0.578763	0	0	0	1.40669	0	0	0	6.35335	0	0.540358	0.25803	0.452949	0.703372	0	0	0.480857	1.95633	9.54053	0.76667	0.49111	-0.04896	0
d833	0	0	-0.142362	-0.017406	-0.169416	0.694145	-0.054308	-0.194725	0.982924	-0.086067	-0.100709	0.061124	0.085838	0.119215	-0.036673	-0.091864	0.637189	0.968438	1.0476	0.92713	1.06501	1.06874	0.435948	0.484476	0.542644	10.6587	0.578763	0	0	0	1.40669	0	0	0	6.35335	0	0.540358	0.25803	0.452949	0.703372	0	0	0.480857	1.95633	9.54053	0.76667	0.49111	-0.04896	0
d834	0	0	0.20436	-0.115798	0.026686	0.271395	0.08938	0.159321	0.814791	0.050316	0.00507	0.18893	0.195102	0.18502	0.057292	-0.018302	1.07668	0.794517	0.791192	0.802424	0.935043	0.978224	0.584287	0.693841	0.670994	18.3893	0.369481	0	0	0	0	0	0	0	6.44523	0	0.541481	0.295942	0	0	0	0	0	1.91242	9.64826	0.80447	0.5224	-0.07727	0
d835	0	0	-0.162724	0.168934	0.058818	2.88324	0.083787	-0.020945	0.681066	-0.055859	0.015036	0.151265	0.116847	0.081103	0.05714	-0.076446	1.38552	0.843839	0.97195	0.97531	1.00499	1.04607	0.567598	0.632786	0.75876	22.7062	0.202534	0	0	0	0	0	0	0	5.40164	0	0.427971	0.307966	0	0	0	0	0	2.02963	10.2273	0.76047	0.48165	-0.03832	0
d836	0	0	-0.31197	-0.21114	-0.1616	0.873328	0.001575	-0.021782	1.11828	-0.093157	-0.042451	0.097323	0.101511	0.118358	0.001111	-0.029179	1.1176	0.892286	0.896315	0.92949	1.03841	1.06303	0.627713	0.85854	0.827637	16.1803	0.040849	0	0	0	0	0	0	0	6.87094	0	0.59238	0.279213	0	0	0	0	0	1.73511	9.38041	0.78378	0.49457	-0.05361	0
d837	0	0	-0.127642	-0.01041	-0.17061	1.29956	0.135447	0.063839	0.623604	-0.062938	-0.076825	0.163693	0.170644	0.182281	0.089668	0.007216	0.699167	0.846622	0.897164	0.840142	0.925664	0.990382	0.458044	0.495238	0.531534	23.4197	0.078864	0	0	0	0.913249	0	0	0	6.24338	0	0.525416	0.222515	0.453627	0	0	0	0.459622	1.97688	9.64448	0.74917	0.47967	-0.03681	0
d838	0	0	-0.23603	-0.346107	0.08132	-1.14033	-0.023528	-0.04282	0.98163	-0.088578	0.022492	-0.098015	-0.009258	0.034518	-0.015603	-0.045603	0.58519	1.03005	0.950884	0.968909	0.976513	0.997673	0.633531	0.639909	0.53076	14.5497	0.327957	0	0	0	0	0	0	0	6.94585	0	0.601843	0	0	0	0	0	0	1.83401	9.35145	0.79744	0.50996	-0.06471	0
d839	0	0	-0.100633	-0.028702	-0.081762	0.206669	-0.2953	-0.060689	0.766578	-0.05434	-0.034002	-0.183753	-0.149784	-0.14653	-0.202119	0.007154	0.759501	1.13924	1.09598	1.11906	1.17685	0.965819	0.459547	0.502085	0.54009	16.9684	0.040042	0	0	0	0	0	0	0	6.80353	0	0.589073	0.385376	0	0	0	0	0	1.86059	9.36349	0.74155	0.47817	-0.03057	0
d840	0	0	-0.267714	0.30799	-0.113631	1.86939	0.219622	0.385355	1.71039	-0.118101	-0.042548	0.066885	0.03384	0.010411	0.141914	0.027414	0.921492	0.941572	0.93974	0.959222	0.846814	1.19743	0.506674	0.541303	0.663633	6.61852	0.309473	0	0	0	0	0	0	0	7.20976	0	0.642028	0.390223	0	0	0	0	0	1.77754	9.09838	0.81282	0.53256	-0.08676	0
d841	0	0	0.088331	-0.429219	-0.171173	-0.374309	-0.205367	0.021218	1.25452	0.048477	-0.082528	0.037607	0.024732	0.100536	-0.134542	0.07676	0.66827	0.943118	0.936961	0.891762	1.066	1.0317	0.803007	0.736092	0.581855	8.40187	0.139186	0	0	0	1.40952	0	0	0	6.89504	0	0.610972	0.394006	0.570548	0.444645	0	0	0.838976	0	0	0.78258	0.50817	-0.0615	0
d842	0	0	0.088331	-0.429219	-0.171173	-0.374309	-0.205367	0.021218	1.25452	0.048477	-0.082528	0.037607	0.024732	0.100536	-0.134542	0.07676	0.66827	0.943118	0.936961	0.891762	1.066	1.0317	0.803007	0.736092	0.581855	8.40187	0.139186	0	0	0	1.40952	0	0	0	6.89504	0	0.610972	0.394006	0.570548	0.444645	0	0	0.838976	0	0	0.78258	0.50817	-0.0615	0
d843	0	0	-0.335229	-0.030867	0.205345	1.08479	0.0342	-0.196787	1.30993	-0.09646	0.044559	0.042909	0.09627	0.096769	0.022053	-0.023522	0.636381	0.946062	0.901458	0.884298	0.951695	0.966744	0.493179	0.495363	0.481911	17.8807	0	0	0	0	0	0	0	0	6.38967	0	0.533595	0.29857	0	0	0	0	0	1.91702	9.70373	0.79437	0.51752	-0.07155	0
d844	0	0	-0.202009	-0.149957	0.018877	-0.12856	0.012491	0.079154	1.09148	-0.097361	0.009098	0.079308	0.113895	0.139919	0.008585	0.065291	0.805593	0.910528	0.905603	0.886325	0.992455	1.06189	0.581319	0.62609	0.606654	10.5967	0.085344	0	0	0	0	0	0	0	7.19346	0	0.638037	0.270394	0	0	0	0	0	1.78556	9.13507	0.79185	0.4994	-0.05986	0
d845	0	0	-0.200421	0.008593	0.257537	0.520613	-0.307167	-0.180005	1.01242	-0.125204	0.1503	-0.115622	-0.072784	-0.066075	-0.206331	-0.075294	0.876424	1.07828	0.9732	1.02742	1.17734	0.927004	0.514917	0.493015	0.560405	12.5828	0.281788	0	0	0	0	0	0	0	7.02125	0	0.615999	0.460093	0	0	0	0	0	1.84148	9.24134	0.75513	0.49086	-0.04229	0
d846	0	0	-0.017854	0.103634	0.198772	0.144711	-0.221001	0.046029	1.39397	-0.009085	0.085536	0.0131	0.055008	0.125036	-0.142553	-0.13867	0.733842	0.929325	1.01748	0.899425	1.09793	1.07911	0.635037	0.60036	0.656678	8.72056	0.178197	0	0	0	0	0	0	0	7.17307	0	0.626164	0.746211	0	0	0	0	0	1.80158	9.27835	0.81	0.52667	-0.08121	0
d847	0	0	-0.204544	-0.122166	0.089798	-0.112944	0.011177	0.021334	1.02884	-0.086441	0.037949	0.102417	0.143357	0.109512	0.007236	0.050791	0.831696	0.876103	0.842761	0.906619	1.00002	1.02833	0.577009	0.641579	0.637328	12.7691	0.346401	0	0	0	0	0	0	0	7.13298	0	0.62617	0.275069	0	0	0	0	0	1.8007	9.229	0.7963	0.5127	-0.07059	0
d848	0	0	-0.026367	-0.089687	-0.334261	-0.505025	-0.034873	-0.266126	1.61794	-0.010105	-0.099551	0.057445	0.113091	0.109747	-0.022924	0.072282	0.373338	0.942895	0.923365	0.891361	1.01114	0.992522	0.44859	0.660607	0.537909	12.5499	0.093012	0	0	0	0	0	0	0	6.70667	0	0.578208	0.275452	0	0	0	0	0	2.09873	9.57043	0.78889	0.5112	-0.06909	0
d849	0	0	-0.278477	0.145435	-0.142166	0.995225	-0.100775	-0.01371	1.47501	-0.132943	-0.064021	-0.093016	-0.084158	-0.046299	-0.069073	0.078701	0.698309	1.06218	1.06449	1.03638	1.06617	1.00164	0.563161	0.674691	0.763281	9.63014	0.309263	0	0	0	1.31331	0	0	0	7.23777	0	0.63826	0	0.656656	0	0	0	0.656656	1.73657	9.1774	0.78267	0.5117	-0.06244	0
d850	0	0	-0.063713	0.047905	-0.078488	-0.797416	-0.382006	-0.161743	1.81838	-0.029888	-0.034351	-0.023068	0.039235	0.085207	-0.232955	-0.032747	0.65101	0.989201	0.983189	0.927945	1.22948	0.960176	0.619954	0.927717	1.0585	7.06457	0.219489	0	0	0	0.572193	0	0	0	6.88731	0	0.605864	0.394559	0.572193	0.382781	0	0	0.572193	0	0	0.82992	0.55203	-0.10624	0
d851	0	0	-0.145889	-0.081748	-0.04786	-0.176387	0.009852	0.086474	0.912047	-0.06071	-0.01999	0.073758	0.100594	0.093808	0.006354	0.007337	0.797813	0.906459	0.924312	0.923197	0.984838	0.98217	0.591669	0.653921	0.5751	16.9006	0.409939	0	0	0	0	0	0	0	7.23105	0	0.638441	0.273856	0	0	0	0	0	1.75065	9.17111	0.7841	0.50042	-0.05678	0
d852	0	0	-0.160636	-0.02966	-0.007048	0.249267	-0.103747	0.016431	1.2443	-0.109817	-0.004402	0.030738	0.072309	0.091331	-0.063627	0.094966	0.598426	0.897036	0.900984	0.920305	1.03227	1.03177	0.58495	0.657704	0.688604	10.5965	0.112221	0	0	0	0	0	0	0	7.24341	0	0.640955	0	0	0	0	0	0	3.48832	9.1569	0.78369	0.50856	-0.06283	0
d853	0	0	-0.023255	0.40136	0.133142	1.64816	0.13687	0.085386	0.638594	-0.005081	0.022097	0.085799	0.085976	0.056727	0.096262	0.006152	1.12606	0.90326	0.947225	0.983509	0.936429	1.03076	0.658825	0.710967	0.737563	29.2256	0.57252	0	0	0	0	0	0	0	6.6638	0	0.561329	0.290751	0	0.454929	0	0	0	1.80557	9.60624	0.77207	0.48781	-0.04505	0
d854	0	0	-0.348161	0.365841	0.073177	2.01747	0.013321	0.028641	0.73939	-0.102797	0.020212	0.089354	0.099825	0.074587	0.008949	-0.014898	1.11071	0.894029	0.886404	0.93662	0.997708	0.988569	0.633084	0.662573	0.690711	22.3476	0.59724	0	0	0	0	0	0	0	7.05797	0	0.614612	0.282637	0	0	0	0	0	1.77416	9.29841	0.78046	0.4981	-0.05489	0
d855	0	0	-0.069036	0.103384	-0.047835	0.157293	0.001843	-0.04613	0.950013	-0.034759	-0.018657	0.03329	0.030786	0.056884	0.001192	0.040845	0.816393	0.881376	0.986168	1.0111	1.01362	0.957446	0.576784	0.653815	0.694517	14.9424	0.098906	0	0	0	0	0	0	0	6.82004	0	0.583267	0	0	0	0	0	0	1.84796	9.47238	0.76243	0.49819	-0.05082	0
d856	0	0	-0.262981	-0.138098	0.120242	-0.357835	-0.075467	0.016143	1.19051	-0.130361	0.055856	-0.069704	0.014451	-0.008359	-0.045152	0.004223	0.647245	1.01456	0.949789	0.99639	1.01922	1.03106	0.92727	0.638567	0.550434	8.59927	0.309668	0	0	0	0	0	0	0	1.22772	-0.895899	0	0	0	0	0	0	0	0	0	0.82444	0.54082	-0.09448	0
d857	0	0	-0.219359	-0.057608	0.191924	0.402978	-0.01429	-0.125766	0.592638	-0.07475	0.037258	0.118869	0.140073	0.146157	-0.009939	-0.006653	0.703018	0.886103	0.849414	0.875015	1.02822	1.06173	0.553698	0.544849	0.552788	26.3174	0.665689	0	0	0	0	0	0	0	5.58041	0	0.446946	0.278826	0	0	0	0	0	2.02437	10.122	0.74898	0.47671	-0.03152	0
d858	0	0	0.097341	-0.203015	-0.209106	-0.754862	-0.091012	0.00178	0.732707	0.058	-0.10573	-0.00445	0.013985	0.064194	-0.065249	-0.035448	0.803891	1.00056	0.982143	0.991184	1.08207	1.01121	0.505888	0.762667	0.639989	11.1665	0.277141	0	0	0	0	0	0	0	6.1486	0	0.519479	0.249236	0	0	0	0	0	0	0	0.75426	0.4744	-0.03226	0
d859	0	0	0.195256	-0.404168	-0.365944	-1.7365	-0.111108	-0.00998	0.799707	0.058526	-0.085748	-0.023869	-0.001107	0.058121	-0.078518	-0.03278	0.761537	1.01821	0.995744	0.998609	1.09024	1.01309	0.502324	0.743829	0.612311	19.7463	0	0	0	0	0	0	0	0	5.82994	0	0.482471	0.258852	0	0	0	0	0	0	0	0.75833	0.47974	-0.03559	0
d860	0	0	0.204075	-0.47871	-0.139862	-0.81549	-0.30287	-0.083507	1.57514	0.09206	-0.058609	-0.00752	0.027094	0.071723	-0.182791	-0.020649	0.632947	0.986913	0.983081	0.924001	1.15378	0.969731	0.684422	0.720828	0.715025	8.33225	0.368112	0	0	0	1.47734	0	0	0	6.60519	0	0.565859	0.392037	0.568381	0.448156	0	0	0.908956	2.22647	9.25569	0.82148	0.54702	-0.10068	0
d861	0	0	-0.1674	0.000914	0.086595	0.866906	0.045707	0.011152	0.76598	-0.085745	0.038265	0.131545	0.141396	0.17359	0.03073	0.024203	0.750043	0.86089	0.851042	0.835235	0.956552	1.02724	0.458108	0.499854	0.536325	16.8916	0.199002	0	0	0	1.02057	0	0	0	6.66181	0	0.573543	0.231261	0.466376	0.5479	0	0	0.554195	1.9103	9.42335	0.74748	0.4823	-0.03564	0
d862	0	0	-0.071189	0.277189	-0.265708	0.775134	0.161846	-0.056279	0.718474	-0.026372	-0.071873	0.117436	0.123023	0.079306	0.104821	0.008674	0.845694	0.837615	0.849124	0.936218	0.909357	0.938424	0.603939	0.646656	0.690361	21.836	0.357954	0	0	0	0	0	0	0	-0.922112	0	0	0.279574	0	0.543677	0	0	0	1.99224	9.58775	0.75379	0.49199	-0.04409	0
d863	0	0	-0.450034	0.059682	-0.488659	1.28991	0.084588	-0.112475	1.3031	-0.129346	-0.116805	0.130362	0.113014	0.104123	0.059331	0.003536	0.895555	0.859898	0.881323	0.90773	0.961097	0.974969	0.485027	0.54936	0.510375	14.1619	0.231155	0	0	0	0	0	0	0	7.0169	0	0.609398	0.299952	0	0	0	0	0	3.49523	9.31514	0.79118	0.49881	-0.06003	0
d864	0	0	-0.152616	0.03897	0.025623	2.13498	0.084662	0.02775	0.719799	-0.04214	0.005262	0.129344	0.104183	0.071123	0.057869	-0.063866	1.12291	0.869462	0.993488	0.994934	1.0069	1.06677	0.573804	0.653163	0.725957	22.6542	0.248735	0	0	0	0	0	0	0	5.4097	0	0.428244	0.314139	0	0	0	0	0	2.02569	10.2349	0.77652	0.49061	-0.04752	0
d865	0	0	-0.174925	-0.129961	0.119974	-0.133058	0.044663	0.084163	1.0651	-0.078927	0.054906	0.084989	0.12088	0.147369	0.029869	-0.035816	0.816876	0.891714	0.831062	0.858009	0.955527	1.03037	0.581906	0.632187	0.616381	11.8181	0.245483	0	0	0	0	0	0	0	7.13932	0	0.631745	0.269821	0	0	0	0	0	1.82177	9.16189	0.79167	0.50345	-0.06227	0
d866	0	0	-0.266689	-0.322393	0.153891	-0.235337	0.085096	0.116437	0.643853	-0.078337	0.040397	0.107134	0.134552	0.133289	0.059621	-0.008339	0.8577	0.891173	0.862148	0.891779	0.957647	0.994609	0.61825	0.66141	0.625602	25.4725	0	0	0	0	0	0	0	0	6.61692	0	0.562792	0.263449	0	0	0	0	0	1.87793	9.52874	0.7681	0.48291	-0.04147	0
d867	0	0	-0.111972	0.059067	-0.057968	0.709174	0.055824	0.007879	0.847587	-0.05409	-0.02339	0.120796	0.123779	0.124239	0.036722	0.049598	0.852485	0.858492	0.907361	0.935625	1.00199	1.00437	0.521376	0.604805	0.644977	15.701	0.13813	0	0	0	1.12778	0	0	0	6.68926	0	0.572262	0.26095	0.563354	0	0	0	0.564425	1.86627	9.47307	0.76011	0.48837	-0.04568	0
d868	0	0	-0.445974	-0.003066	0.428675	1.21059	0.031959	-0.173533	0.983786	-0.131017	0.090599	0.074496	0.110666	0.125376	0.020828	-0.024449	0.823056	0.908094	0.876828	0.87056	0.94432	0.99258	0.513937	0.494973	0.507894	25.9694	0	0	0	0	1.87527	0	0	0	5.9068	0	0.479103	0.308857	0.468818	0	0	0	0.468818	1.97592	9.99071	0.76343	0.49325	-0.04663	0
d869	0	0	0.004683	0.194425	0.482587	-0.037034	-0.306644	0.104721	1.68468	0.001187	0.103602	-0.089369	-0.012684	0.047863	-0.197422	-0.053778	0.792527	1.04626	1.07267	0.961519	1.16869	1.0786	0.619296	0.556054	0.6181	10.4406	0	0	0	0	0	0	0	0	6.94877	0	0.592325	0.790552	0	0	0	0	0	1.79392	9.49175	0.82917	0.54541	-0.09828	0
d870	0	0	-0.186288	-0.156475	-0.027352	-0.182692	0.011125	0.044207	1.03072	-0.088283	-0.012904	0.084705	0.119296	0.149512	0.007466	-0.032124	0.803296	0.903397	0.915049	0.87664	0.978073	1.02445	0.587118	0.638382	0.613932	13.3683	0.237158	0	0	0	0	0	0	0	7.14152	0	0.632055	0.270312	0	0	0	0	0	1.81018	9.15856	0.788	0.5	-0.05916	0
d871	0	0	-0.244711	-0.19661	0.193737	-0.297711	0.121748	-0.015971	0.844109	-0.089949	0.069625	0.114795	0.163126	0.156857	0.082556	-0.063589	0.921501	0.874293	0.831712	0.859317	0.927732	1.04041	0.624166	0.665274	0.641318	17.3745	0.325586	0	0	0	0	0	0	0	6.65948	0	0.565511	0.275098	0	0	0	0	0	1.88687	9.54355	0.78434	0.49611	-0.05418	0
d872	0	0	0.054958	-0.031132	-0.132727	0.239829	0.122782	0.033395	0.495822	0.024161	-0.04482	0.127707	0.131111	0.10013	0.085136	0.068919	0.799163	0.866203	0.843889	0.921113	0.930953	0.961505	0.469359	0.685087	0.618799	24.0487	0.025398	0	0	0	0	0	0	0	6.58232	0	0.56159	0.2451	0	0.559853	0	0	0	3.81729	0	0.73954	0.47182	-0.02606	0
d873	0	0	-0.154428	-0.027623	-0.170406	0.322576	-0.14952	-0.062448	1.06084	-0.092957	-0.088487	0.020114	0.048846	0.124355	-0.099749	0.016991	0.663748	0.950595	0.948144	0.879074	1.02853	1.06325	0.499139	0.544151	0.561032	11.5647	0.081501	0	0	0	0.557656	0	0	0	7.09931	0	0.627204	0.38746	0.557656	0.504961	0	0	0.557656	1.82562	9.17712	0.7585	0.49202	-0.04465	0
d874	0	0	0.088655	-0.483948	-0.307729	-0.333781	-0.112217	-0.235514	1.75212	0.044525	-0.155617	0.032206	0.037601	0.022788	-0.068329	-0.008306	0.743712	0.959732	0.953727	0.974768	1.04697	0.963487	0.802561	0.811446	0.716077	6.57255	0.139127	0	0	0	0.84048	0	0	0	7.05721	0	0.632479	0.274369	0.84048	0	0	0	0.84048	2.44096	10.0953	0.83333	0.55021	-0.10947	0
d875	0	0	?	?	?	3.88068	0.211339	0.100789	1.21953	0	0	0.14982	0.124764	-0.007434	0.111916	-0.016177	0	0.862191	0.959487	1.14296	1.0965	0.96259	0.72217	0.847207	1.30808	20.5568	0.023271	0	0	0	2.44237	0	0	0	6.00491	0	0.488978	0.294502	0.599379	0	17.1087	0	0.621804	1.9567	9.94914	0.80837	0.51787	-0.07348	0
d876	0	0	-0.203424	0.013896	0.073711	0.293715	-0.054871	0.082504	1.413	-0.157351	0.048525	-0.029892	-0.028125	0.078498	-0.035968	-0.175859	0.697408	1.00329	1.07008	0.947034	0.97798	1.00943	0.573622	0.55573	0.632384	7.51538	0.044868	0	0	0	0.48567	0	0	0	7.32107	0	0.65818	0	0.48567	0	0	0	0.48567	1.76812	9.0138	0.77647	0.49756	-0.05589	0
d877	0	0	-0.120499	-0.105975	-0.216209	-0.363108	-0.020966	-0.162695	1.39164	-0.050184	-0.063365	-0.120123	-0.037011	0.008233	-0.013556	-0.022887	0.884114	1.03119	0.945804	1.00147	0.994026	1.07732	0.659321	0.677135	0.566782	9.08536	0.236678	0	0	0	0	0	0	0	7.23031	0	0.639846	0	0	0	0	0	0	1.79713	9.15625	0.84127	0.54184	-0.09947	0
d878	0	0	-0.228228	-0.054395	-0.045371	0.778878	0.096414	-0.028828	0.695317	-0.066518	-0.011319	0.131393	0.158841	0.14653	0.066583	-0.010651	1.12937	0.868168	0.861406	0.893672	0.975582	1.01777	0.627251	0.664942	0.66693	23.2152	0.384104	0	0	0	0	0	0	0	6.22146	0	0.513749	0.284686	0	0	0	0	0	1.9435	9.81425	0.78016	0.49206	-0.04969	0
d879	0	0	-0.180121	-0.045083	-0.001746	0.32206	-0.116163	-0.023047	1.28759	-0.120759	-0.001193	0.012118	0.035454	0.124342	-0.074948	0.032506	0.705437	0.966547	0.931541	0.881012	1.01438	1.03041	0.491797	0.528154	0.572725	7.42235	0.260728	0	0	0	0.940606	0	0	0	7.30157	0	0.656495	0.360901	0.415506	0.583395	0	0	0.5251	1.78421	9.01648	0.77544	0.5053	-0.05915	0
d880	0	0	-0.156877	-0.025691	-0.124627	0.302552	-0.182925	-0.152457	1.35492	-0.105979	-0.086515	0.038972	0.071284	0.158507	-0.117127	0.010636	0.677741	0.942319	0.936954	0.855269	1.04922	1.018	0.481585	0.521116	0.560468	8.29538	0.260956	0	0	0	0.94353	0	0	0	7.2178	0	0.644658	0.362329	0.416034	0.576365	0	0	0.527496	1.8101	9.07856	0.77963	0.51057	-0.06363	0
d881	0	0	-0.070907	0.07317	-0.112404	0.568355	-0.221187	-0.146287	1.34396	-0.032456	-0.047426	0.063124	0.084201	0.144627	-0.142738	-0.019476	0.828028	0.92287	0.966533	0.878096	1.10919	1.06153	0.55879	0.527217	0.59453	8.56737	0.211528	0	0	0	0.990582	0	0	0	7.1451	0	0.629449	0.384675	0.427054	0.524048	0	0	0.563529	1.81535	9.20011	0.81	0.53182	-0.08367	0
d882	0	0	-0.034348	0.062751	0.119946	0.109078	-0.011433	-0.062244	?	-0.013993	0.042861	0.028653	-0.0423	0.084515	-0.012766	0	1.1186	1.05301	1.25773	0.938376	1.04189	1.21051	0	0	0	10.7598	0.254872	0	0	0	0	0	0	0	0	0	0	0	0	0	0	0	0	0	0	0.79749	0.6643	-0.22178	0
d883	0	0	0.104476	-0.395865	0.183398	0.974736	-0.12823	-0.033698	1.90366	0.026087	0.042366	0.138247	0.082995	0.122179	-0.079044	-0.000506	1.10137	0.86876	0.979565	0.910608	1.11098	1.04103	0.825478	0.854933	0.825195	11.952	0	0	0	0	1.86877	0	0	0	6.00619	0	0.497494	0.265661	0.934383	0	0	0	0.934383	0	0	0.83709	0.55088	-0.10958	0
d884	0	0	-0.136723	-0.163309	0.073077	0.593306	0.051911	-0.091934	0.674656	-0.060671	0.027927	0.076049	0.11736	0.116875	0.036122	0.000909	0.774699	0.931927	0.944802	0.919788	0.993552	1.03408	0.649093	0.758796	0.612319	19.4859	0.310421	0	0	0	0	0	0	0	4.86268	4.42676	0	0.270933	0	0	0	0	0	0	0	0.76377	0.48286	-0.03985	0
d885	0	0	0.11389	-0.124351	-0.026758	0.261688	0.055578	-0.061594	0.666586	0.033995	-0.006355	0.136097	0.157738	0.151353	0.03658	-0.020989	1.13363	0.836543	0.831903	0.874499	0.980349	1.00631	0.595338	0.674357	0.684098	26.0476	0.151393	0	0	0	0	0	0	0	6.16994	0	0.507134	0.28673	0	0	0	0	0	1.9524	9.86003	0.7734	0.49432	-0.04859	0
d886	0	0	-0.151219	0.349804	0.394609	1.73602	-0.039114	0.022783	0.807202	-0.040741	0.094616	0.090195	0.104567	0.105302	-0.027935	-0.028279	1.09833	0.918651	0.951942	0.937698	1.06145	1.0537	0.676108	0.640552	0.733943	18.1208	0	0	0	0	0	0	0	0	6.73275	0	0.56831	0.283185	0	0	0	0	0	1.83426	9.58991	0.796	0.49893	-0.05809	0
d887	0	0	-0.092653	-0.030001	0.086206	-0.704708	-0.326527	-0.19592	1.81838	-0.043422	0.03608	-0.00699	0.046222	0.077627	-0.199123	-0.087137	0.879341	0.973367	0.976308	0.93541	1.20674	0.965305	0.622116	0.932846	1.01855	7.06457	0.241308	0	0	0	0.580767	0	0	0	6.57659	0	0.564801	0.400657	0.580767	0.334973	0	0	0.580767	0	0	0.82992	0.55203	-0.10624	0
d888	0	0	-0.170158	-0.021183	-0.113368	0.372006	-0.142567	-0.081471	1.13264	-0.104435	-0.059639	0.02125	0.052568	0.127203	-0.096097	0.109522	0.659651	0.952001	0.93332	0.876703	1.03412	1.09013	0.490782	0.52811	0.550696	9.83615	0.137934	0	0	0	0.564023	0	0	0	7.11127	0	0.628431	0.390868	0.564023	0.46995	0	0	0.564023	1.81299	9.17234	0.75909	0.49057	-0.0439	0
d889	0	0	-0.13807	-0.035275	-0.172847	0.271916	-0.155509	-0.055506	0.999791	-0.081437	-0.088438	0.017249	0.041606	0.119366	-0.103093	0.013057	0.666429	0.950951	0.964584	0.883333	1.02633	1.03533	0.506838	0.559225	0.56888	13.2932	0.038758	0	0	0	0.555128	0	0	0	7.08216	0	0.625044	0.386057	0.555128	0.522824	0	0	0.555128	1.83386	9.18785	0.75803	0.49323	-0.04528	0
d890	0	0	?	?	?	1.78683	0.248438	0.167343	1.73982	0	0	0.112589	0.066598	-0.091747	0.117295	-0.001506	0	0.900858	1.04177	1.26591	1.15648	0.976197	0.702316	0.846692	1.3267	11.3463	0.300014	0	0	0	2.40162	0	0	0	6.4973	0	0.545367	0.288329	0.588894	0	16.5561	0	0.611913	1.86616	9.64599	0.82432	0.5312	-0.08761	0
d891	0	0	-0.082139	-0.062839	-0.163477	0.401004	-0.105646	-0.120767	1.22949	-0.050037	-0.099587	0.12209	0.11834	0.198649	-0.067524	0.003129	0.59519	0.868654	0.899932	0.83081	1.0131	0.99948	0.453672	0.504093	0.564969	10.4533	0.302745	0	0	0	0	0	0	0	7.1512	0	0.635261	0.33408	0	0.629824	0	0	0	1.82666	9.12912	0.7746	0.51206	-0.06206	0
d892	0	0	0.035108	0.06462	-0.097762	0.499588	-0.196679	-0.135684	1.13728	0.01514	-0.036539	-0.045199	0.028346	0.03972	-0.127598	-0.031611	0.798127	0.998176	1.01901	0.960196	1.11917	1.08344	0.578074	0.532743	0.571385	11.3049	0.070093	0	0	0	0	0	0	0	6.69677	0	0.575162	0.388155	0	0	0	0	0	1.89614	9.44117	0.79333	0.51637	-0.06932	0
d893	0	0	-0.142395	0.001693	-0.173043	1.26999	0.131562	0.052945	0.64049	-0.071621	-0.078351	0.159443	0.16481	0.176414	0.088043	0.001283	0.699297	0.851541	0.902078	0.846164	0.929917	1.01212	0.452761	0.481011	0.52637	21.6912	0.2156	0	0	0	0.929727	0	0	0	6.29396	0	0.531215	0.222478	0.461783	0	0	0	0.467944	1.96706	9.61567	0.74889	0.47813	-0.03595	0
d894	0	0	-0.114648	-0.1426	0.252494	0.259268	0.040984	-0.081342	0.75119	-0.042063	0.080573	0.112361	0.152863	0.111797	0.02778	-0.025955	0.978636	0.885058	0.862809	0.928794	1.02862	1.06269	0.559086	0.601612	0.587967	19.8881	0.436811	0	0	0	0	0	0	0	6.42818	0	0.541995	0.27394	0	0	0	0	0	1.93563	9.61806	0.77429	0.4908	-0.04795	0
d895	0	0	-0.002027	0.218753	0.202623	1.49546	0.130469	0.191288	1.62366	-0.000619	0.050149	0.088908	0.079388	-0.006958	0.081545	-0.016548	0.896721	0.93073	0.9014	0.976183	0.935621	1.19589	0.554978	0.540244	0.695457	5.79051	0.211147	0	0	0	0	0	0	0	7.06249	0	0.607741	0.416534	0	0	0	0	0	1.7826	9.40362	0.84326	0.55533	-0.1073	0
d896	0	0	-0.145353	-0.001127	0.141221	0.811815	-0.004326	0.108754	0.856001	-0.079525	0.073464	0.142243	0.13962	0.186201	-0.002821	0.021802	0.695857	0.847424	0.833311	0.818847	0.981207	1.01012	0.435769	0.483347	0.538251	15.3228	0.377682	0	0	0	0.991984	0	0	0	6.73027	0	0.582668	0.228022	0.457785	0.609935	0	0	0.534199	1.90478	9.37213	0.75965	0.49407	-0.04698	0
d897	0	0	-0.140035	-0.067179	0.116158	0.625899	0.015677	0.059575	0.846252	-0.064797	0.051551	0.103476	0.122824	0.152873	0.010471	0.01353	0.63301	0.892143	0.869296	0.857285	0.981482	1.01284	0.453464	0.508444	0.530529	15.2699	0.335096	0	0	0	1.01163	0	0	0	6.71973	0	0.580849	0.230119	0.463506	0.562943	0	0	0.548125	1.90257	9.38569	0.765	0.49375	-0.04741	0
d898	0	0	0.008182	0.071711	0.148064	1.15404	-0.05283	0.024441	0.943424	0.003207	0.054576	0.151942	0.164558	0.179127	-0.035844	-0.058149	0.771866	0.863444	0.923019	0.859075	1.06954	1.08867	0.482654	0.485792	0.557711	12.1508	0.482367	0	0	0	1.02567	0	0	0	6.6075	0	0.559472	0.234149	0.512719	0.59419	0	0	0.512954	1.89131	9.57126	0.78302	0.5048	-0.05859	0
d899	0	0	-0.208654	-0.002454	0.173215	-0.164508	0.132278	0.061888	0.708425	-0.053434	0.034174	0.1389	0.189916	0.183553	0.092752	0.026945	0.768783	0.870922	0.869749	0.853227	0.9544	0.992123	0.650103	0.648041	0.608684	20.7573	0.003816	0	0	0	0	0	0	0	5.30942	0	0.416328	0.299606	0	0	0	0	0	2.02855	10.3299	0.77943	0.49259	-0.04908	0
d900	0	0	-0.30453	0.178211	0.32399	1.9349	-0.00555	-0.224777	1.20664	-0.098909	0.082047	0.085998	0.122962	0.106633	-0.003618	-0.021453	0.752918	0.923344	0.88874	0.893336	1.01685	0.990253	0.436532	0.45593	0.474402	18.5033	0	0	0	0	0	0	0	0	6.32099	0	0.531405	0.281898	0	0	0	0	0	1.93876	9.64573	0.77854	0.50429	-0.06045	0
d901	0	0	-0.250538	0.495027	-0.047144	0.115238	0.015817	-0.08892	1.2001	-0.091052	-0.012441	-0.011698	-0.020241	-0.062146	0.01021	0.197574	0.689441	0.964795	0.986873	1.07922	1.05248	0.914432	0.633372	0.757341	0.712762	10.8252	0	0	0	0	0	0	0	0	6.50355	0	0.54705	0	0	0	0	0	0	0	0	0.79111	0.50751	-0.06117	0
d902	0	0	0.116113	-0.371287	-0.03408	-1.0228	-0.501067	0.029597	2.21664	0.088046	-0.032303	-0.236571	-0.253517	-0.124952	-0.284478	-0.0287	0.510629	1.21254	1.3658	1.13696	1.23537	0.947472	0.961084	0.862971	0.776108	2.65256	0.298159	0	0	0	0.818081	0	0	0	7.25666	0	0.663665	0.385521	0.818081	0	0	0	0.818081	0	0	0.8625	0.58125	-0.14007	0
d903	0	0	0.129121	-0.379964	-0.034872	-0.643959	-0.172654	-0.131417	1.86943	0.088683	-0.02642	-0.025993	-0.092444	-0.003363	-0.102603	-0.010509	0.578713	1.02939	1.182	1.0338	1.09134	0.941798	0.866426	0.782879	0.714842	3.82286	0.21213	0	0	0	0.818081	0	0	0	7.14351	0	0.648201	0.273543	0.818081	0	0	0	0.818081	0	0	0.84445	0.5579	-0.11764	0
d904	0	0	0.129339	-0.38059	-0.044216	-0.159649	-0.084607	0.057457	1.48217	0.079842	-0.029217	0.029382	-0.027506	0.016514	-0.053223	0.011999	0.540866	0.980054	1.08777	0.997661	1.03424	0.957165	0.78424	0.711519	0.637662	5.77336	0.12337	0	0	0	0.818081	0	0	0	7.02555	0	0.632478	0.230736	0.818081	0	0	0	0.818081	0	0	0.82188	0.53194	-0.09281	0
d905	0	0	0.129339	-0.38059	-0.044151	0.212275	-0.038389	0.055381	1.11656	0.071479	-0.02554	0.045735	0.005492	0.022894	-0.025631	0.033154	0.536407	0.959479	1.02922	0.979864	1.00283	0.947922	0.725452	0.660934	0.58451	8.89416	0.049477	0	0	0	0.818081	0	0	0	6.92047	0	0.618791	0.213029	0.818081	0	0	0	0.818081	0	0	0.7975	0.50729	-0.06936	0
d906	0	0	0.094301	-0.149986	-0.086832	-1.0228	-0.479011	0.096746	2.21664	0.071865	-0.081443	-0.236571	-0.253517	-0.124952	-0.271955	-0.144236	0.850468	1.21254	1.3658	1.13696	1.23416	0.961867	0.961084	0.855205	1.1452	2.65256	0.146147	0	0	0	0.807432	0	0	0	6.93431	0	0.616954	0.38999	0.807432	0	0	0	0.807432	0	0	0.8625	0.58125	-0.14007	0
d907	0	0	0.129339	-0.38059	-0.044151	0.212275	-0.038389	0.055381	1.11656	0.071479	-0.02554	0.045735	0.005492	0.022894	-0.025631	0.033154	0.536407	0.959479	1.02922	0.979864	1.00283	0.947922	0.725452	0.660934	0.58451	8.89416	0.049477	0	0	0	0.818081	0	0	0	6.92047	0	0.618791	0.213029	0.818081	0	0	0	0.818081	0	0	0.7975	0.50729	-0.06936	0
d908	0	0	-0.20053	0.028201	-0.265389	1.61411	-0.054885	-0.007848	1.09749	-0.058126	-0.063046	0.078025	0.069754	0.09121	-0.037565	-0.037364	1.20571	0.912815	0.975876	0.953733	1.05972	1.01052	0.645529	0.80112	0.80678	17.0453	0.330275	0	0	0	0.921011	0	0	0	7.01094	0	0.610758	0.288019	0.460505	0	0	0	0.460505	1.74003	9.2883	0.77984	0.49729	-0.05329	0
d909	0	0	-0.186288	-0.156475	-0.027352	-0.182692	0.011125	0.044207	1.03072	-0.088283	-0.012904	0.084705	0.119296	0.149512	0.007466	-0.032124	0.803296	0.903397	0.915049	0.87664	0.978073	1.02445	0.587118	0.638382	0.613932	13.3683	0.237158	0	0	0	0	0	0	0	7.14152	0	0.632055	0.270312	0	0	0	0	0	1.81018	9.15856	0.788	0.5	-0.05916	0
d910	0	0	-0.026061	-0.026614	0.01771	-0.347736	0.046982	-0.163786	0.718292	-0.015706	0.007846	0.03991	0.060193	0.042176	0.030953	0.012748	0.756396	0.913468	0.917163	0.937874	0.946455	0.975374	0.6335	0.795441	0.690203	13.7451	0.410639	0	0	0	1.86236	0	0	0	6.80281	0	0.588994	0	0.460622	0	0	0	0.470558	0	0	0.75521	0.49041	-0.04158	0
d911	0	0	-0.192411	-0.137155	-0.024753	0.368526	0.032532	-0.130968	0.790253	-0.079918	-0.008701	0.09784	0.147502	0.138559	0.022654	-0.022038	0.749818	0.917096	0.903039	0.896369	1.01885	1.05618	0.535045	0.576939	0.545759	16.6328	0.140162	0	0	0	0	0	0	0	6.19444	0	0.519283	0.270312	0	0	0	0	0	1.96243	9.67576	0.76984	0.48616	-0.04538	0
d912	0	0	-0.268357	0.168643	-0.045919	1.13819	0.122317	-0.047729	0.902141	-0.116634	-0.015156	0.166859	0.157446	0.066298	0.076962	0.014844	1.00898	0.770746	0.802744	1.01068	1.01929	1.0442	0.563266	0.605145	0.686095	15.0806	0.03155	0	0	0	0	0	0	0	6.59977	0	0.553452	0.285783	0	0	0	0	0	1.86401	9.65566	0.77188	0.50268	-0.05723	0
d913	0	0	0.069896	-0.214111	0.041504	-0.829303	0.141969	0.024715	0.600603	0.030784	0.014584	0.112191	0.126798	0.128046	0.103131	0.042193	0.822384	0.879064	0.869835	0.89237	0.909292	1.017	0.580143	0.844155	0.698653	19.7237	0.821878	0	0	0	0	0	0	0	6.91992	0	0.604882	0.256232	0	0.578524	0	0	0	3.41694	0	0.74952	0.47009	-0.02723	0
d914	0	0	-0.094434	-0.226936	0.05072	0.974373	-0.109731	-0.000148	1.50992	-0.034158	0.015892	0.105428	0.137885	0.150002	-0.072785	0.108828	1.08055	0.890505	0.898349	0.875134	1.0898	1.04695	0.697549	0.723097	0.867464	11.9041	0.131655	0	0	0	1.54446	0	0	0	6.12185	0	0.510745	0.271131	0.6024	0.355199	0	0	0.942055	0	0	0.79598	0.51309	-0.06809	0
d915	0	0	0.242536	-0.447546	-0.169003	-2.18025	-0.158438	-0.348035	2.82567	0.092463	-0.059942	-0.003921	0.041138	0.054038	-0.062828	-0.038771	0.592275	0.99417	0.963996	0.867769	0.91988	0.655233	0.541789	0.753478	0.687251	9.13827	0.28972	0	0	0	1.5201	0	0	0	6.62504	0	0.567824	0.420865	0.603779	0.234083	13.219	0	0.916321	0	0	0.87893	0.58051	-0.13477	0
d916	0	0	-0.138351	-0.104023	-0.266095	0.257524	-0.102394	-0.192128	1.03794	-0.074573	-0.1427	-0.056867	0.026395	0.047564	-0.064954	-0.053562	0.62406	1.04964	1.00235	0.952254	1.03353	1.06244	0.521365	0.527342	0.533268	10.4312	0.252874	0	0	0	0	0	0	0	6.73564	0	0.582248	0.374015	0	0	0	0	0	1.88454	9.38072	0.77801	0.49882	-0.05531	0
d917	0	0	-0.13979	0.054238	0.081382	1.34786	0.03952	-0.169358	0.458981	-0.050478	0.017276	0.125795	0.136991	0.137328	0.02726	-0.03881	0.753964	0.893856	0.859663	0.886878	1.00149	1.01738	0.477781	0.514825	0.527416	35.1829	0.275051	0	0	0	0	0	0	0	5.85246	0	0.478624	0.272856	0	0	0	0	0	2.00279	9.91808	0.7359	0.46944	-0.02454	0
d918	0	0	-0.14005	-0.138118	-0.146634	0.082724	0.097689	-0.010871	0.824434	-0.052329	-0.048484	0.150986	0.182773	0.156713	0.065685	0.048616	0.895342	0.837542	0.856886	0.907841	0.981549	1.02414	0.592065	0.693984	0.669213	18.2267	0.380021	0	0	0	1.13506	0	0	0	6.39361	0	0.534806	0.275743	0.567169	0	0	0	0.567889	1.92144	9.68914	0.77879	0.4975	-0.05556	0
d919	0	0	-0.127715	0.201328	0.067164	1.08444	0.027652	-0.024408	0.810759	-0.043923	0.019657	0.100448	0.110659	0.089221	0.018687	0.000354	1.0011	0.86509	0.870503	0.955596	1.01575	0.988741	0.564202	0.635713	0.714877	17.9742	0.089848	0	0	0	0.630846	0	0	0	6.68236	0	0.566802	0.277282	0.630846	0.369656	0	0	0.630846	1.85752	9.54962	0.76852	0.49387	-0.04842	0
d920	0	0	-0.228066	-0.101518	-0.265435	1.66328	0.088102	-0.07331	1.05032	-0.078311	-0.065898	0.109246	0.107055	0.118606	0.060324	-0.016806	1.15667	0.868802	0.872973	0.927109	0.969353	1.03503	0.54505	0.737595	0.725197	17.6398	0.918224	0	0	0	0	0	0	0	6.72914	0	0.578026	0.295545	0	0.26442	0	0	0	1.81958	9.4277	0.76245	0.48929	-0.04367	0
d921	0	0	0.150639	-0.451063	-0.239	-0.132879	-0.11533	0.004541	1.12329	0.078539	-0.124608	0.137464	0.124696	0.170941	-0.073234	-0.009531	0.498171	0.860873	0.900853	0.845755	1.05071	1.06284	0.730529	0.688792	0.612462	10.9725	0.547012	0	0	0	0.825032	0	0	0	6.75945	0	0.595789	0.262399	0.825032	0.631415	0	0	0.825032	0	0	0.78681	0.51636	-0.06867	0
d922	0	0	-0.242457	0.093221	-0.055313	0.427105	-0.084345	0.061685	1.26584	-0.146957	-0.027297	0.077965	0.125839	0.091354	-0.05205	0.077915	0.736799	0.832369	0.801163	0.892223	1.02595	1.10386	0.544794	0.551955	0.616841	10.0458	0.104411	0	0	0	0	0	0	0	7.10735	0	0.621352	0	0	0	0	0	0	1.81288	9.26741	0.78333	0.51701	-0.07034	0
d923	0	0	-0.298799	0.117007	-0.074481	0.823683	-0.000818	0.175953	0.857138	-0.160177	-0.029325	0.173357	0.175592	0.200062	-0.000552	0.025829	0.686742	0.815496	0.807147	0.819623	0.965839	1.16159	0.590279	0.439532	1.0501	16.0775	0.183537	0	0	0	1.13268	0	0	0	6.41408	0	0.54304	0.419367	0.541171	0	0	0	0.591513	1.8958	9.56922	0.75137	0.47763	-0.03326	0
d924	0	0	-0.099208	-0.353965	-0.194638	-0.585065	0.093184	0.058759	1.08664	-0.038221	-0.074648	0.069236	0.078853	0.10193	0.065917	0.164701	0.785736	0.90944	0.910899	0.917787	0.933388	1.04611	0.628269	0.668559	0.498447	11.8567	0.237158	0	0	0	0	0	0	0	7.58443	0	0.678123	0.276459	0	0	0	0	0	1.65155	9.04414	0.808	0.5082	-0.06735	0
d925	0	0	-0.263814	0.05154	0.000107	0.357146	-0.104389	0.063865	1.20891	-0.168479	6.4e-05	0.040588	0.077229	0.04334	-0.061228	0.053688	0.68656	0.911234	0.893195	0.934734	1.02744	1.0352	0.888545	0.581876	0.597411	8.08128	0.176831	0	0	0	0	0	0	0	1.22763	-0.879973	0	0	0	0	0	0	0	0	0	0.79919	0.52741	-0.07966	0
d926	0	0	-0.184848	-0.026126	0.041059	0.310386	-0.072602	-0.009778	1.08027	-0.103731	0.021575	0.019687	0.048911	0.094833	-0.047778	-0.006878	0.701903	0.949595	0.889753	0.920823	1.02659	1.01963	0.456246	0.501895	0.559018	10.4539	0.230902	0	0	0	0.545909	0	0	0	7.18117	0	0.638554	0.28309	0.545909	0.495919	0	0	0.545909	1.79666	9.11541	0.76818	0.49619	-0.04952	0
d927	0	0	-0.169167	-0.004784	-0.003724	0.548953	-0.093933	-0.127845	0.961258	-0.098253	-0.001792	0.068824	0.080026	0.137973	-0.064079	0.000735	0.706822	0.924873	0.972524	0.881731	1.04406	1.06857	0.477712	0.504424	0.545909	11.3618	0.062521	0	0	0	1.06175	0	0	0	6.62977	0	0.569334	0.274399	0.497723	0.463945	0	0	0.564023	1.89237	9.44212	0.752	0.48226	-0.03733	0
d928	0	0	-0.099208	-0.353965	-0.194638	-0.585065	0.093184	0.058759	1.08664	-0.038221	-0.074648	0.069236	0.078853	0.10193	0.065917	0.164701	0.785736	0.90944	0.910899	0.917787	0.933388	1.04611	0.628269	0.668559	0.498447	11.8567	0.237158	0	0	0	0	0	0	0	7.58443	0	0.678123	0.276459	0	0	0	0	0	1.65155	9.04414	0.808	0.5082	-0.06735	0
d929	0	0	-0.222935	0.090144	0.125803	1.16391	0.031757	-0.136961	0.912573	-0.094276	0.045874	0.08265	0.092995	0.086585	0.020393	-0.061177	1.11981	0.878246	0.852779	0.911898	0.965003	0.905501	0.589406	0.623075	0.641292	16.5066	0.115922	0	0	0	0	0	0	0	6.43623	0	0.538053	0.284652	0	0	0	0	0	1.92357	9.69514	0.78466	0.50631	-0.06064	0
d930	0	0	-0.613226	0.210208	-0.139228	3.03229	-0.130144	-0.186559	1.86524	-0.321814	-0.075014	0.045171	0.074136	0.093168	-0.081381	0.08832	0.739648	0.936552	0.910749	0.895297	1.0495	1.0214	0.771248	0.574677	0.645884	5.63834	0.22251	0	0	0	0	0	0	0	1.33243	7.67608	0	0.273308	0	0	0	0	0	2.35392	9.96524	0.80965	0.53056	-0.08716	0
d931	0	0	-0.120254	-0.071693	-0.071597	0.107712	0.051316	0.171966	0.68199	-0.041884	-0.022276	0.058455	0.073238	0.064482	0.034533	-0.012058	0.786415	0.93952	0.984668	0.954324	0.966557	1.01107	0.562322	0.667675	0.608569	22.5759	0.345751	0	0	0	0.519641	0	0	0	6.85927	0	0.592841	0.261515	0.519641	0.591075	0	0	0.519641	1.80978	9.37216	0.76142	0.48582	-0.04285	0
d932	0	0	-0.1294	-0.12824	-0.119144	-0.079789	0.013819	-0.047064	0.895343	-0.054078	-0.046574	0.113723	0.150657	0.162636	0.00931	-0.091932	0.81383	0.881952	0.873601	0.87025	1.01644	1.04538	0.570292	0.605041	0.534122	15.7947	0.341292	0	0	0	0	0	0	0	6.60043	0	0.56147	0.271562	0	0	0	0	0	1.90183	9.53018	0.78421	0.49714	-0.05553	0
d933	0	0	-0.278392	-0.252764	-0.09308	0.060302	-0.035471	-0.059285	1.38001	-0.092663	-0.024523	0.002016	0.034104	0.088321	-0.023645	0.013442	0.935036	0.949605	0.944709	0.96014	1.03023	1.07888	0.662946	0.889904	0.848934	11.9466	0.065181	0	0	0	0	0	0	0	7.04188	0	0.615915	0.377895	0	0	0	0	0	1.77394	9.25646	0.79949	0.5122	-0.06855	0
d934	0	0	-0.278392	-0.252764	-0.09308	0.060302	-0.035471	-0.059285	1.38001	-0.092663	-0.024523	0.002016	0.034104	0.088321	-0.023645	0.013442	0.935036	0.949605	0.944709	0.96014	1.03023	1.07888	0.662946	0.889904	0.848934	11.9466	0.065181	0	0	0	0	0	0	0	7.04188	0	0.615915	0.377895	0	0	0	0	0	1.77394	9.25646	0.79949	0.5122	-0.06855	0
d935	0	0	-0.208751	-0.166754	0.265633	-0.192579	0.120059	0.119464	0.986402	-0.09738	0.126609	0.092019	0.125571	0.15888	0.077648	-0.031215	0.904641	0.877454	0.809783	0.836382	0.889147	1.0017	0.587715	0.647857	0.62691	15.2553	0.389725	0	0	0	0	0	0	0	7.07598	0	0.624178	0.269605	0	0	0	0	0	1.85075	9.19501	0.7881	0.50707	-0.06348	0
d936	0	0	0.070757	0.152355	0.242504	-0.204833	-0.238485	-0.098061	1.36253	0.021942	0.06689	-0.11156	-0.002835	0.057999	-0.155619	-0.194456	0.702317	1.05008	1.06751	0.970988	1.14366	1.04862	0.720621	0.645239	0.628042	8.76375	0.055243	0	0	0	0	0	0	0	7.12134	0	0.616628	0.732171	0	0	0	0	0	1.80477	9.35151	0.85556	0.56144	-0.11375	0
d937	0	0	-0.29103	0.283484	-0.020406	1.88929	0.254059	0.455668	1.63076	-0.127798	-0.007621	0.04374	0.00498	-0.011628	0.165253	0.035541	0.919597	0.95899	0.938689	0.976245	0.827298	1.20247	0.515542	0.551827	0.679331	6.78191	0.313244	0	0	0	0	0	0	0	7.29198	0	0.654043	0.389111	0	0	0	0	0	1.76079	9.03302	0.80732	0.52609	-0.08095	0
d938	0	0	-0.29103	0.283484	-0.020406	1.88929	0.254059	0.455668	1.63076	-0.127798	-0.007621	0.04374	0.00498	-0.011628	0.165253	0.035541	0.919597	0.95899	0.938689	0.976245	0.827298	1.20247	0.515542	0.551827	0.679331	6.78191	0.313244	0	0	0	0	0	0	0	7.29198	0	0.654043	0.389111	0	0	0	0	0	1.76079	9.03302	0.80732	0.52609	-0.08095	0
d939	0	0	-0.29103	0.283484	-0.020406	1.88929	0.254059	0.455668	1.63076	-0.127798	-0.007621	0.04374	0.00498	-0.011628	0.165253	0.035541	0.919597	0.95899	0.938689	0.976245	0.827298	1.20247	0.515542	0.551827	0.679331	6.78191	0.313244	0	0	0	0	0	0	0	7.29198	0	0.654043	0.389111	0	0	0	0	0	1.76079	9.03302	0.80732	0.52609	-0.08095	0
d940	0	0	-0.29103	0.283484	-0.020406	1.88929	0.254059	0.455668	1.63076	-0.127798	-0.007621	0.04374	0.00498	-0.011628	0.165253	0.035541	0.919597	0.95899	0.938689	0.976245	0.827298	1.20247	0.515542	0.551827	0.679331	6.78191	0.313244	0	0	0	0	0	0	0	7.29198	0	0.654043	0.389111	0	0	0	0	0	1.76079	9.03302	0.80732	0.52609	-0.08095	0
d941	0	0	-0.29103	0.283484	-0.020406	1.88929	0.254059	0.455668	1.63076	-0.127798	-0.007621	0.04374	0.00498	-0.011628	0.165253	0.035541	0.919597	0.95899	0.938689	0.976245	0.827298	1.20247	0.515542	0.551827	0.679331	6.78191	0.313244	0	0	0	0	0	0	0	7.29198	0	0.654043	0.389111	0	0	0	0	0	1.76079	9.03302	0.80732	0.52609	-0.08095	0
d942	0	0	0.029972	-0.206117	0.23137	-0.154367	-0.397597	-0.048143	1.88847	0.013903	0.099835	0.055828	0.077164	0.133657	-0.2404	-0.00894	0.922285	0.92427	0.951684	0.882823	1.23118	0.980061	0.752387	0.767009	0.910688	6.43107	0.419325	0	0	0	1.46647	0	0	0	6.49442	0	0.555901	0.384023	0.561604	0.472779	0	0	0.904865	0	0	0.83333	0.55654	-0.11039	0
d943	0	0	-0.05493	0.079362	-0.213714	0.614191	0.166194	-0.039743	0.725068	-0.02047	-0.057698	0.115112	0.117945	0.076272	0.111539	0.036003	0.877882	0.843487	0.871754	0.957922	0.927149	0.968167	0.51823	0.609356	0.615126	20.3539	0.313787	0	0	0	0	0	0	0	6.51363	0	0.546151	0.278742	0	0.542184	0	0	0	1.88502	9.66153	0.75341	0.48723	-0.03968	0
d944	0	0	-0.294925	-0.386623	-0.024409	-0.224089	0.026285	-0.101833	1.39764	-0.091158	-0.005972	-0.00148	0.020784	0.07424	0.017874	0.012711	0.91985	0.952787	0.950621	0.977114	0.99505	1.09497	0.683746	0.894566	0.774811	11.4781	0.065181	0	0	0	0	0	0	0	7.3552	0	0.647808	0.38468	0	0	0	0	0	1.65987	9.17725	0.80718	0.51547	-0.07182	0
d945	0	0	-0.200805	-0.105155	0.202745	0.064609	0.023255	-0.039952	0.895343	-0.08406	0.081608	0.1058	0.153533	0.144321	0.015667	-0.044794	0.921273	0.892651	0.874771	0.882439	1.01151	1.06122	0.570542	0.613677	0.59263	15.7947	0.323517	0	0	0	0	0	0	0	6.708	0	0.575669	0.271562	0	0	0	0	0	1.89099	9.44801	0.78421	0.49714	-0.05553	0
d946	0	0	-0.374417	0.124245	-0.047514	3.40953	0.109257	-0.069619	0.993563	-0.135848	-0.013813	0.214757	0.197234	0.13676	0.07195	0.013637	1.12349	0.76637	0.828566	0.886289	0.977498	1.04167	0.569977	0.589086	0.598102	14.4649	0.067181	0	0	0	0	0	0	0	7.00118	0	0.599157	0.278617	0	0	0	0	0	1.75234	9.4521	0.80468	0.51629	-0.07468	0
d947	0	0	-0.173358	0.036294	-0.268396	1.37085	0.004855	-0.24303	1.55443	-0.089681	-0.100038	0.070563	0.064789	0.007028	0.002426	0.147414	0.786337	0.885114	0.912342	0.954726	1.04616	0.993607	0.63086	0.779455	0.961104	12.2948	0.306319	0	0	0	1.93503	0	0	0	6.876	0	0.593582	0	0.473354	0	16.6554	0	0.494163	0	0	0.79009	0.51053	-0.06265	0
d948	0	0	-0.305171	0.304611	0.137617	1.40914	-0.271271	-0.273441	0.999959	-0.184737	0.079357	-0.098459	-0.07921	-0.091298	-0.179837	-0.013144	0.726491	1.05718	0.969999	1.04677	1.14935	0.929612	0.718149	0.495723	0.677379	13.138	0.073488	0	0	0	0.915178	0	0	0	6.30593	-0.893265	0.53597	0.459546	0.915178	-0.928074	0	0	0.915178	2.07226	9.5563	0.75803	0.4963	-0.0463	0
d949	0	0	-0.333421	-0.00316	-0.202572	1.6133	-0.010168	-0.194768	1.04303	-0.098284	-0.046179	0.096876	0.147309	0.137452	-0.006869	-0.022155	0.635227	0.918815	0.89989	0.886071	1.03953	1.04773	0.453353	0.48166	0.474262	23.2903	0	0	0	0	0	0	0	0	5.94603	0	0.491302	0.278219	0	0	0	0	0	1.98354	9.81518	0.77093	0.49378	-0.05163	0
d950	0	0	-0.098756	-0.148058	0.30586	0.375148	0.041536	-0.057839	0.66404	-0.034689	0.090791	0.120803	0.142066	0.119489	0.028158	-0.03888	0.970085	0.889639	0.933273	0.931676	1.03436	1.06404	0.568885	0.603676	0.596704	23.7394	0.528537	0	0	0	0.505859	0	0	0	6.26815	0	0.52416	0.273226	0.505859	0	0	0	0.505859	1.96032	9.6994	0.76749	0.48654	-0.0438	0
d951	0	0	0.097399	-0.287381	-0.036596	-0.654059	0.136315	0.027135	0.611063	0.042999	-0.012736	0.125056	0.125405	0.134886	0.09733	0.062437	0.808242	0.860201	0.820355	0.874474	0.902807	1.00354	0.639531	0.723396	0.55003	19.4046	0.839548	0	0	0	0	0	0	0	6.61762	0	0.569746	0.255521	0	0.581696	0	0	0	3.45949	0	0.75411	0.47407	-0.03107	0
d952	0	0	-0.073504	0.072502	-0.002064	0.323232	0.005545	-0.092919	1.02719	-0.035887	-0.00082	0.073155	0.089079	0.082543	0.003605	0.029157	0.863842	0.87254	0.871645	0.971172	1.02233	0.96579	0.511692	0.584653	0.644128	11.7263	0.422821	0	0	0	1.03642	0	0	0	6.86258	0	0.589591	0.407201	0.439661	0.458621	0	0	0.596756	1.83764	9.42886	0.76415	0.5	-0.05175	0
d953	0	0	0.044107	-0.212329	0.052204	0.211469	-0.273659	-0.084749	1.43435	0.019057	0.019133	0.024581	0.013245	0.08522	-0.173911	0.030686	0.941376	0.951569	1.00688	0.920775	1.13836	1.03445	0.822444	0.858163	0.817796	9.09246	0.081263	0	0	0	1.50717	0	0	0	6.28085	0	0.529434	0.408731	0.591382	0.393385	0	0	0.915789	0	0	0.79744	0.52108	-0.0746	0
d954	0	0	0.044107	-0.212329	0.052204	0.211469	-0.273659	-0.084749	1.43435	0.019057	0.019133	0.024581	0.013245	0.08522	-0.173911	0.030686	0.941376	0.951569	1.00688	0.920775	1.13836	1.03445	0.822444	0.858163	0.817796	9.09246	0.081263	0	0	0	1.50717	0	0	0	6.28085	0	0.529434	0.408731	0.591382	0.393385	0	0	0.915789	0	0	0.79744	0.52108	-0.0746	0
d955	0	0	-0.23032	-0.139319	-0.331628	1.46677	0.098637	-0.071185	1.00037	-0.070494	-0.070952	0.097426	0.098389	0.106445	0.067866	-0.017358	1.0765	0.882544	0.884732	0.939193	0.964099	1.02212	0.559916	0.746634	0.710531	19.1254	0.758381	0	0	0	0	0	0	0	6.67986	0	0.57149	0.309762	0	0.250319	0	0	0	1.82439	9.46517	0.76552	0.49014	-0.04453	0
d956	0	0	0.181447	-0.050714	0.213241	-0.664305	0.132338	-0.125411	1.30236	0.080014	0.106383	0.072505	0.01358	0.021321	0.085178	0.028031	0.808487	0.951615	1.15947	1.01749	0.996889	1.18244	0.531035	0.855496	0.809668	11.7864	0.242599	0	0	0	1.17498	0	0	0	7.07721	0	0.623721	0.239518	0.587489	0	0	0	0.587489	3.18013	0	0.79136	0.51058	-0.06848	0
d957	0	0	0.198261	-0.291758	-0.294548	-1.0321	-0.237794	-0.124377	1.40528	0.06584	-0.094481	-0.112987	-0.035088	0.024667	-0.148771	-0.083919	0.648502	1.05811	1.04542	0.974664	1.09455	0.982406	0.959411	0.844732	0.657075	8.88278	0.080506	0	0	0	0.838986	0	0	0	6.97932	0	0.620313	0.725472	0.838986	0	0	0	0.838986	0	0	0.84762	0.56052	-0.11315	0
d958	0	0	-0.024821	0.110317	-0.243131	-0.118125	-0.190967	-0.121368	1.28325	-0.008747	-0.080864	-0.127236	-0.031681	0.053944	-0.122835	-0.092868	0.679139	1.05903	1.05818	0.952028	1.07008	0.990614	0.665354	0.641354	0.592716	10.4317	0.075757	0	0	0	0	0	0	0	7.19524	0	0.637772	0.725363	0	0	0	0	0	1.81176	9.14543	0.82653	0.54112	-0.09375	0
d959	0	0	-0.111464	-0.064219	-0.036304	0.472684	-0.004579	0.05189	1.28948	-0.06717	-0.022404	0.137221	0.138382	0.210921	-0.002907	0.002095	0.668791	0.855035	0.810133	0.806426	0.948451	1.06323	0.444463	0.493754	0.564017	9.89107	0.275845	0	0	0	0	0	0	0	7.15627	0	0.636134	0.332785	0	0.635992	0	0	0	1.83148	9.12409	0.77833	0.51742	-0.06648	0
d960	0	0	0.150643	-0.451019	-0.242261	0.154128	-0.046415	0.068493	0.957582	0.074334	-0.119542	0.1423	0.135828	0.16162	-0.030209	0.005067	0.511172	0.859645	0.887354	0.852752	1.02283	1.03434	0.706881	0.670056	0.593954	13.3131	0.603132	0	0	0	0.825032	0	0	0	6.65213	0	0.582559	0.22745	0.825032	0.629505	0	0	0.825032	0	0	0.77716	0.5045	-0.05855	0
d961	0	0	0.018328	-0.034006	0.101853	-0.663023	0.089373	-0.093164	0.658061	0.005049	0.025496	0.113163	0.165755	0.134764	0.05958	0.007531	0.931417	0.882888	0.86409	0.898582	0.970654	1.03683	0.813008	1.02579	0.870007	16.4883	0.086294	0	0	0	0	6.12693	0	0	3.43047	2.04238	0.333345	0.264161	0	-1.42975	0	0	0	0	0	0.79589	0.5	-0.05616	0
d962	0	0	-0.326189	0.302308	0.268873	2.25769	0.025283	0.020687	0.636895	-0.094287	0.066422	0.110457	0.132107	0.122607	0.01789	-0.044367	1.12081	0.897847	0.891616	0.913413	1.02228	1.05666	0.616587	0.626132	0.693834	26.4493	0.259252	0	0	0	0	0	0	0	6.03612	0	0.498285	0.279241	0	0.398067	0	0	0	1.97412	9.82277	0.77037	0.48326	-0.04264	0
d963	0	0	?	?	?	-1.06942	-0.068169	-0.217991	1.79971	0	0	-0.193716	-0.218394	-0.238166	-0.028565	-0.00993	0	1.18461	1.33195	1.44769	1.26575	1.08162	0.744405	0.985214	1.27466	14.4317	0	0	0	0	7.12907	0	0	0	6.66091	0	0.572957	0.446474	0.566563	0	17.1374	0	0.618907	0	0	0.79802	0.50727	-0.06181	0
d964	0	0	-0.139255	0.39698	-0.293314	2.31684	0.154683	0.307885	1.55319	-0.043734	-0.075235	0.088958	0.052027	0.02254	0.099409	0.063059	0.91249	0.925266	0.957279	0.962249	0.908754	1.18022	0.566075	0.57422	0.694376	7.62421	0.267023	0	0	0	0	0	0	0	7.09039	0	0.621194	0.400201	0	0	0	0	0	1.80689	9.24735	0.82917	0.5466	-0.09891	0
d965	0	0	-0.264889	0.000821	-0.24955	2.06616	0.072743	-0.069981	1.05168	-0.082402	-0.054381	0.106033	0.100741	0.111371	0.049971	-0.020441	1.1568	0.874363	0.883458	0.938522	0.98406	1.03481	0.554257	0.740344	0.723419	18.1492	0.866134	0	0	0	0	0	0	0	6.72102	0	0.57675	0.30381	0	0.25704	0	0	0	1.81932	9.43672	0.77037	0.4934	-0.04811	0
d966	0	0	-0.272809	0.000618	-0.271844	2.17863	0.090413	-0.070807	0.976106	-0.082594	-0.059426	0.124917	0.11837	0.123355	0.062739	-0.021597	1.21674	0.861515	0.872474	0.927731	0.977821	1.03702	0.563094	0.757403	0.750453	20.2897	0.76552	0	0	0	0	0	0	0	6.67657	0	0.571514	0.289019	0	0.255813	0	0	0	1.82511	9.46046	0.76628	0.48915	-0.04461	0
d967	0	0	-0.15393	-0.093665	0.051176	0.136895	0.103721	0.114622	0.745099	-0.056332	0.016194	0.090824	0.102394	0.089135	0.069362	-0.008034	0.823856	0.910865	0.966676	0.935251	0.939249	1.01665	0.554211	0.64944	0.581949	19.2419	0.306204	0	0	0	0.515018	0	0	0	6.90666	0	0.599427	0.262743	0.515018	0.576227	0	0	0.515018	1.80389	9.33355	0.771	0.49189	-0.04995	0
d968	0	0	0.000557	-0.181987	0.053892	-0.899227	0.135832	-0.054305	2.85538	0.000859	0.119395	-0.209506	-0.19755	-0.092531	0.085837	-0.180637	0.461363	1.16063	1.17396	1.13954	0.837456	0.778826	0.487955	0.969573	0.765058	4.90738	0.005167	2	0	0	0	0	0	0	0	0	0	0.37466	0	0	0	0	0	0	0	0.90267	0.57901	-0.14203	0
d969	0	0	-0.10926	-0.047097	-0.147135	0.46218	-0.097685	-0.128732	1.33634	-0.068258	-0.092486	0.131682	0.135373	0.204359	-0.062803	0.006996	0.59684	0.860449	0.8712	0.821788	1.01593	1.03461	0.441701	0.484812	0.555967	8.67637	0.289601	0	0	0	0	0	0	0	7.18301	0	0.63968	0.335121	0	0.611961	0	0	0	1.81696	9.10537	0.77748	0.51285	-0.06336	0
d970	0	0	-0.262985	-0.256653	-0.28999	-0.092272	0.07218	0.184957	0.994083	-0.054461	-0.052698	0.115226	0.13595	0.119249	0.047629	0.091915	0.782831	0.864123	0.897202	0.92837	0.974287	0.984452	0.594808	0.655115	0.626106	28.5221	0	0	0	0	0	0	0	0	6.22451	0	0.510226	0.289149	0	0	0	0	0	1.87559	9.87206	0.78727	0.5015	-0.05865	0
d971	0	0	-0.032586	-0.074963	0.320497	-0.111777	-0.033947	0.028698	1.04564	-0.011704	0.109129	0.09821	0.133262	0.146278	-0.022937	-0.109349	0.83825	0.900759	0.944033	0.895795	1.03776	1.04747	0.643011	0.645212	0.647268	13.6403	0.449709	0	0	0	0	0	0	0	7.0043	0	0.604085	0.274268	0	0	0	0	0	1.82062	9.39058	0.80988	0.5151	-0.073	0
d972	0	0	?	?	?	-0.896034	-0.085139	-0.184572	2.41984	0	0	-0.233992	-0.256079	-0.297853	-0.034306	0.018875	0	1.24433	1.41733	1.55112	1.32644	1.12361	0.731915	0.975999	1.20415	5.07632	0.027828	0	0	0	3.35111	0	0	0	6.93561	0	0.611571	0.415736	0.53235	0	16.1273	0	0.584694	0	0	0.8321	0.5291	-0.08657	0
d973	0	0	-0.135249	-0.115382	-0.148032	0.181851	0.115683	0.03111	0.728354	-0.052785	-0.045957	0.117944	0.133568	0.140898	0.082766	0.082725	0.906864	0.874475	0.863754	0.874225	0.922839	1.01639	0.524122	0.602467	0.5207	19.4537	0.707336	0	0	0	0	0	0	0	7.16634	0	0.630082	0.257964	0	0.570666	0	0	0	3.44344	9.20669	0.75225	0.47431	-0.032	0
d974	0	0	?	?	?	-0.157984	-0.114617	0.127241	1.88444	0	0	-0.07588	-0.092547	-0.12097	-0.052748	0.282652	0	1.06029	1.18301	1.30047	1.29868	1.114	0.668297	0.812585	1.08201	9.30578	0.412992	0	0	0	3.30941	0	0	0	6.65894	0	0.566248	0.33855	0.640166	0	17.2207	0	0.689415	1.70499	9.4986	0.81102	0.52086	-0.07618	0
d975	0	0	-0.010861	0.082116	0.041557	0.497945	0.10529	0.068232	0.718773	-0.004812	0.015556	0.18193	0.145783	0.066115	0.067615	0.14513	1.15367	0.771164	0.79946	0.999697	1.02219	1.06744	0.618407	0.682572	0.665969	14.534	0.554676	0	0	0	0.552329	0	0	0	5.76154	0	0.465419	0.277412	0.552329	0.501643	0	0	0.552329	0	0	0.76885	0.50284	-0.05314	0
d976	0	0	-0.109954	-0.03522	-0.133992	0.710129	-0.026597	-0.09708	1.08758	-0.064983	-0.073362	0.151324	0.1584	0.196464	-0.01751	-0.026149	0.623866	0.846487	0.897652	0.832866	1.02148	1.07172	0.434708	0.473821	0.538056	10.6783	0.449641	0	0	0	0	0	0	0	6.86143	0	0.599007	0.264754	0	0.606522	0	0	0	1.8682	9.29029	0.76667	0.49868	-0.05167	0
d977	0	0	-0.155353	0.08346	-0.076695	1.04706	0.047081	-0.096532	0.748182	-0.073647	-0.028682	0.104744	0.100042	0.101918	0.03019	0.004934	0.72434	0.896394	0.988652	0.91794	0.969137	1.02487	0.507983	0.546283	0.503289	20.1233	0.03064	0	0	0	0.985312	0	0	0	6.90604	0	0.600508	0.277821	0.491578	0.704234	0	0	0.493734	1.80927	9.31796	0.75801	0.49063	-0.04603	0
d978	0	0	-0.153968	0.092919	-0.057104	1.29328	0.035125	0.019417	0.658293	-0.068806	-0.02179	0.132874	0.125366	0.121753	0.022944	0.000967	0.768409	0.881343	0.999001	0.913378	1.00161	1.01135	0.498591	0.547682	0.528853	23.3145	0.187399	0	0	0	1.47232	0	0	0	6.85304	0	0.593935	0.256048	0.487005	0	0	0	0.493734	1.81815	9.34945	0.75255	0.48405	-0.04059	0
d979	0	0	-0.106826	0.036195	0.108422	0.721246	0.002322	-0.003474	?	-0.10578	0.072719	0.129406	0.077146	0.112923	0.006004	0	0.824656	0.602627	0.780098	0.642601	0.812207	1.01366	0	0	0	20.659	0.507772	0	0	0	0	0	0	0	0	0	0	0	0	0	0	0	0	0	0	0.72638	0.58357	-0.1384	0
d980	0	0	-0.138139	-0.095637	-0.109926	0.105739	0.088001	-0.009209	0.804165	-0.046491	-0.033022	0.15906	0.190632	0.13476	0.056857	0.066217	0.941163	0.819703	0.819406	0.916588	0.986007	1.00738	0.58659	0.704097	0.696233	19.8984	0.392278	0	0	0	1.15602	0	0	0	6.33526	0	0.526426	0.279025	0.577542	0	0	0	0.578474	1.93118	9.75287	0.78356	0.50724	-0.0637	0
d981	0	0	?	?	?	0.891329	-0.134976	0.162808	1.71293	0	0	-0.013156	-0.055501	-0.125136	-0.065622	0.292344	0	1.03789	1.16547	1.30013	1.3254	1.12323	0.605651	0.775265	1.08991	11.2851	0.372754	0	0	0	3.23321	0	0	0	6.59368	0	0.560372	0.260801	0.620084	0	17.2297	0	0.678595	1.71701	9.50634	0.79599	0.50734	-0.06468	0
d982	0	0	-0.102279	0.07662	0.00328	0.596267	0.016171	-0.138431	1.04501	-0.05297	0.001378	0.067866	0.078789	0.056845	0.010091	0.045236	0.924162	0.862685	0.804908	0.969017	0.9856	0.920046	0.52898	0.597523	0.626982	11.5251	0.44681	0	0	0	1.90499	0	0	0	6.79775	0	0.583116	0.399694	0.435264	0.483468	0	0	0.586268	1.8587	9.44693	0.77421	0.5112	-0.06295	0
d983	0	0	-0.190348	-0.000171	-0.215405	1.52577	-0.066223	-0.023484	1.1188	-0.055867	-0.051106	0.09312	0.085196	0.107706	-0.044599	-0.017815	1.18799	0.895896	0.962422	0.938788	1.06642	1.00835	0.647524	0.809006	0.849387	17.1068	0.322695	0	0	0	0.919873	0	0	0	6.82639	0	0.588866	0.286668	0.459936	0	0	0	0.459936	1.80681	9.38693	0.78417	0.50174	-0.05759	0
d984	0	0	-0.193364	-0.083618	0.066082	0.432316	0.031749	0.040589	0.741583	-0.071693	0.021766	0.110997	0.112167	0.106534	0.021232	-0.023986	0.842704	0.903022	1.00629	0.936283	1.01223	1.03721	0.571834	0.623198	0.565479	20.9526	0.216997	0	0	0	1.03407	0	0	0	6.84456	0	0.591863	0.274654	0.515018	0	0	0	0.519056	1.81324	9.3683	0.771	0.49189	-0.04995	0
d985	0	0	-0.163663	-0.026739	0.189587	1.05658	0.086535	-0.141262	0.478223	-0.056082	0.038485	0.123016	0.13751	0.139515	0.061507	-0.030815	0.711135	0.907878	0.888783	0.899465	0.981574	1.03388	0.499541	0.531893	0.534685	33.4264	0.295931	0	0	0	0	0	0	0	6.13319	0	0.508969	0.277417	0	0	0	0	0	1.9619	9.77193	0.73569	0.46633	-0.02284	0
d986	0	0	-0.052377	-0.424425	-0.156983	-1.26288	-0.067124	0.005846	0.85617	-0.019568	-0.060634	0.032113	0.044552	0.04494	-0.043184	-0.011616	0.767292	0.942804	0.98858	0.968583	1.03657	0.989439	0.938048	0.945782	0.706821	20.6437	0.302229	0	0	0	1.46567	0	0	0	6.40888	0	0.556629	0.269102	0.728127	-0.338879	0	0	0.737547	0	0	0.78189	0.50762	-0.06233	0
d987	0	0	?	?	?	0.822337	-0.130034	0.085509	1.71293	0	0	-0.008451	-0.048338	-0.112435	-0.063219	0.285854	0	1.03323	1.15838	1.28756	1.32092	1.1197	0.605395	0.776252	1.08923	11.2851	0.392972	0	0	0	3.23407	0	0	0	6.60614	0	0.561793	0.257495	0.620294	0	17.2041	0	0.678726	1.71525	9.50011	0.79599	0.50734	-0.06468	0
d988	0	0	-0.194615	0.279183	-0.217553	0.68218	-0.181213	-0.118113	1.37317	-0.083244	-0.078432	0.003949	0.020728	0.084157	-0.115888	0.173229	0.814148	0.971734	0.997359	0.929291	1.10735	1.06501	0.817298	0.944592	0.851876	9.56304	0.109458	0	0	0	2.29838	0	0	0	6.40098	0.939082	0.552535	0.393975	0.461526	0.412195	0	0	0.759211	0	0	0.7956	0.51889	-0.07268	0
d989	0	0	-0.073504	0.072502	-0.002064	0.323232	0.005545	-0.092919	1.02719	-0.035887	-0.00082	0.073155	0.089079	0.082543	0.003605	0.029157	0.863842	0.87254	0.871645	0.971172	1.02233	0.96579	0.511692	0.584653	0.644128	11.7263	0.422821	0	0	0	1.03642	0	0	0	6.86258	0	0.589591	0.407201	0.439661	0.458621	0	0	0.596756	1.83764	9.42886	0.76415	0.5	-0.05175	0
d990	0	0	0.034997	-0.215149	-0.087642	-1.00604	-0.026114	-0.216616	1.40938	0.026401	-0.099172	-0.224718	-0.198075	-0.152965	-0.017039	0.053802	0.516355	1.18467	1.17651	1.19375	0.943487	0.709693	0.597785	0.966025	0.645529	4.22468	0.187741	0	0	0	0	0	0	0	7.40961	0	0.671118	0.355073	0	0	0	0	0	0	0	0.81884	0.52099	-0.07945	0
d991	0	0	-0.19871	0.032022	0.232161	1.18077	0.071827	-0.153073	0.478134	-0.072709	0.047775	0.130867	0.142714	0.146986	0.050279	-0.032551	0.742791	0.888748	0.871555	0.88706	0.982631	1.03987	0.478255	0.492085	0.521126	33.2964	0.355833	0	0	0	0	0	0	0	5.92145	0	0.485487	0.283989	0	0	0	0	0	1.98865	9.89127	0.73245	0.46565	-0.02124	0
d992	0	0	-0.265704	0.190307	-0.072314	2.47892	0.071582	-0.077413	0.966799	-0.105974	-0.023109	0.230713	0.214576	0.147697	0.046097	0.035237	1.06579	0.753372	0.822101	0.876663	1.00683	1.03651	0.535416	0.622744	0.746962	14.9335	0.067181	0	0	0	0	0	0	0	6.67344	0	0.567264	0.27276	0	0	0	0	0	1.86641	9.53132	0.79591	0.51253	-0.07092	0
d993	0	0	-0.162092	-0.006097	-0.030823	0.700655	0.032387	-0.001412	0.839745	-0.066507	-0.011061	0.062821	0.068761	0.108006	0.020573	-0.05435	1.09963	0.888303	0.841974	0.877231	0.935557	1.02229	0.598885	0.637413	0.64834	21.0484	0.060543	0	0	0	0	0	0	0	6.31294	0	0.523576	0.286893	0	0	0	0	0	1.93984	9.77257	0.78037	0.50627	-0.05954	0
d994	0	0	-0.200545	0.018089	0.131783	0.818459	0.041319	0.011936	0.835959	-0.072769	0.043133	0.120547	0.130667	0.134792	0.027031	-0.052142	1.08151	0.85357	0.83998	0.874024	0.967743	0.987218	0.61776	0.645109	0.66014	19.0497	0.032775	0	0	0	0	0	0	0	6.35024	0	0.52809	0.276729	0	0	0	0	0	1.93128	9.74561	0.78714	0.50419	-0.05986	0
d995	0	0	-0.3661	0.40102	0.05747	2.09343	-0.0551	0.01543	0.715435	-0.103088	0.014664	0.069471	0.090502	0.069236	-0.037346	-0.027913	1.1052	0.924427	0.92756	0.95561	1.05996	1.0349	0.634105	0.658004	0.6834	23.5975	0.582645	0	0	0	0	0	0	0	7.02968	0	0.610597	0.284257	0	0	0	0	0	1.77379	9.32105	0.78015	0.49602	-0.05305	0
d996	0	0	-0.08138	0.41569	0.042074	2.03789	0.14147	0.30617	1.66979	-0.025729	0.010847	0.075536	0.044097	0.010699	0.092357	-0.004802	0.902635	0.943599	0.970909	0.975316	0.918986	1.20802	0.556026	0.555213	0.685511	5.84731	0.216629	0	0	0	0	0	0	0	7.07743	0	0.614058	0.401242	0	0	0	0	0	1.78798	9.33039	0.83799	0.55145	-0.10444	0
d997	0	0	0.151914	-0.513003	0.563295	0.373849	-0.213213	-0.123424	1.91922	0.04877	0.15307	0.052665	0.024799	0.079893	-0.135695	0.026286	0.824265	0.943276	0.999323	0.931048	1.10915	1.06911	0.819532	0.72125	0.668288	8.23764	0.129654	0	0	0	3.40714	0	0	0	6.29885	0	0.528903	0.40442	0.466887	0.358292	0	0	0.950168	0	0	0.82222	0.54103	-0.09508	0
d998	0	0	-0.237058	0.186439	-0.061972	0.895377	-0.062966	-0.036102	1.32499	-0.153004	-0.041537	0.006923	-0.000217	0.046918	-0.043104	0.016992	0.817541	0.982631	0.984194	0.957698	1.02123	1.04755	0.476381	0.439453	1.07578	6.72746	0.210273	0	0	0	2.00963	0	0	0	6.98925	0	0.616935	0.363282	0.416053	0.53806	0	0	0.561576	1.84252	9.18444	0.77071	0.49662	-0.05157	0
d999	0	0	0.055476	-0.240191	0.076075	0.621904	-0.125956	-0.0476	1.23475	0.022552	0.02758	0.094993	0.074251	0.124094	-0.081892	0.013209	1.04403	0.896821	0.94839	0.896155	1.08045	1.04196	0.777694	0.825325	0.788303	11.4331	0.166512	0	0	0	1.50717	0	0	0	5.96625	0	0.494855	0.258622	0.591382	0.391325	0	0	0.915789	0	0	0.78736	0.50938	-0.06438	0
d1000	0	0	?	?	?	0.709635	-0.070752	0.103552	1.52906	0	0	0.012723	-0.031103	-0.112337	-0.035207	0.25847	0	0.980951	1.10271	1.27971	1.28312	1.10832	0.608991	0.793805	1.10318	13.9055	0.528168	0	0	0	3.29399	0	0	0	6.52213	0	0.550592	0.272694	0.634778	0	17.3575	0	0.688297	1.72242	9.56902	0.78681	0.50479	-0.06042	0
d1001	0	0	?	?	?	0.876719	-0.068665	0.137864	1.5692	0	0	0.035504	0.011881	-0.103028	-0.033351	0.265571	0	0.957487	1.06701	1.27389	1.29548	1.12516	0.617318	0.803187	1.10282	13.967	0.518869	0	0	0	3.25965	0	0	0	6.4816	0	0.546126	0.271454	0.62384	0	17.4537	0	0.684837	1.73515	9.58904	0.7927	0.51116	-0.06658	0
d1002	0	0	?	?	?	0.290357	-0.059778	0.075908	1.49898	0	0	-0.010791	-0.049053	-0.124156	-0.030569	0.229921	0	1.01743	1.13525	1.30451	1.27018	1.11621	0.63889	0.801984	1.06333	13.9227	0.404521	0	0	0	3.32976	0	0	0	6.49849	0	0.54712	0.281045	0.643667	0	17.4283	0	0.693837	1.72169	9.59374	0.80506	0.51457	-0.07092	0
d1003	0	0	?	?	?	0.443323	-0.056287	0.107052	1.53576	0	0	0.010168	-0.006725	-0.115238	-0.028133	0.23759	0	0.995569	1.09866	1.29863	1.2807	1.13209	0.64778	0.811066	1.06203	13.9842	0.393753	0	0	0	3.30022	0	0	0	6.45565	0	0.542346	0.279804	0.634044	0	17.5333	0	0.69101	1.73435	9.616	0.81086	0.52091	-0.07709	0
d1004	0	0	-0.254036	-0.054109	0.045646	0.051762	0.04254	0.082871	0.953297	-0.102584	0.016869	0.112665	0.139802	0.099222	0.028294	0.022508	0.909055	0.864132	0.825295	0.910926	0.987999	1.07869	0.578257	0.593478	0.549768	14.4032	0.372371	0	0	0	0	0	0	0	7.13798	0	0.624164	0.278377	0	0	0	0	0	1.7569	9.25754	0.78362	0.50236	-0.05933	0
d1005	0	0	-0.100663	0.052503	-0.176427	0.722274	0.022162	0.00264	?	-0.091495	-0.0943	0.136527	0.079274	0.140019	0.049073	0	0.511031	0.538509	0.717966	0.557708	0.664286	0.703026	0	0	0	15.9634	0.206354	0	0	0	0	0	0	0	0	0	0	0	0	0	0	0	0	0	0	0.73769	0.6061	-0.16296	0
d1006	0	0	-0.041753	-0.01307	-0.036549	-0.298061	0.055096	-0.180692	0.749614	-0.025782	-0.01626	0.045136	0.070154	0.043397	0.036508	0.016827	0.754121	0.912015	0.907329	0.939216	0.949251	1.00138	0.629036	0.782434	0.681894	12.0166	0.373891	0	0	0	1.87435	0	0	0	6.75416	0	0.582409	0	0.462304	0	0	0	0.474871	0	0	0.75537	0.4892	-0.04077	0
d1007	0	0	?	?	?	-0.088992	-0.118376	0.204396	1.88444	0	0	-0.081306	-0.100572	-0.134571	-0.054478	0.288581	0	1.06566	1.19094	1.31392	1.30333	1.10675	0.668572	0.811685	1.08376	9.30578	0.392698	0	0	0	3.3226	0	0	0	6.65157	0	0.565224	0.339522	0.644173	0	17.2521	0	0.690858	1.70566	9.50515	0.81102	0.52086	-0.07618	0
d1008	0	0	-0.174374	0.012445	-0.003052	0.391308	-0.16293	-0.116227	1.32368	-0.099912	-0.001771	0.05893	0.103619	0.10511	-0.098808	0.064644	0.736433	0.914299	0.847394	0.886622	1.0649	1.02093	0.477996	0.533438	0.588023	7.69617	0.235529	0	0	0	0.98792	0	0	0	7.20918	0	0.638267	0.383024	0.426011	0.52539	0	0	0.56191	1.79961	9.15352	0.79167	0.52868	-0.08053	0
d1009	0	0	0.133615	-0.217492	-0.135582	-0.301803	-0.230081	-0.185081	1.44433	0.116959	-0.152998	-0.228694	-0.232307	-0.158571	-0.149114	0.006017	0.807804	1.23927	1.35132	1.18924	1.07713	0.838599	0.742477	0.500868	0.788533	2.81226	0.198279	1	0	0	0.828441	0	0	0	0	0	0	0.345788	0.828441	0	0	0	0.828441	0	0	0.8	0.50313	-0.06258	0
d1010	0	0	-0.16878	0.008039	0.001536	0.181855	-0.148394	0.083306	1.26611	-0.116794	0.000976	0.006966	0.035311	0.06977	-0.089902	0.071124	0.550457	0.927811	0.986261	0.943365	1.0573	1.02275	0.559865	0.613101	0.643902	10.8325	0.111567	0	0	0	0	0	0	0	7.21903	0	0.638228	0	0	0	0	0	0	1.79901	9.16597	0.78741	0.51295	-0.0666	0
d1011	0	0	-0.260512	-0.345725	0.339213	-0.832593	0.094168	0.088777	0.72091	-0.077947	0.093598	0.121561	0.166929	0.171692	0.064382	-0.022475	0.911953	0.871553	0.851135	0.862297	0.952335	1.06435	0.653445	0.691401	0.643209	22.5763	0.011028	0	0	0	0	0	0	0	6.24607	0	0.515064	0.281545	0	0	0	0	0	1.93639	9.82594	0.78016	0.49206	-0.04969	0
d1012	0	0	-0.051222	0.343354	0.410727	2.13672	-0.049707	-0.00248	0.802625	-0.011536	0.080171	0.110719	0.124531	0.113311	-0.034964	-0.108494	1.05924	0.901901	0.962645	0.937319	1.07682	1.05824	0.718136	0.658015	0.743451	19.0781	0.686969	0	0	0	0	0	0	0	6.65864	0	0.556609	0.286135	0	0	0	0	0	1.85486	9.68369	0.80714	0.50882	-0.06645	0
d1013	0	0	-0.200811	0.321791	-0.058685	1.97337	0.056666	-0.022391	0.631322	-0.051491	-0.01254	0.088779	0.096708	0.080535	0.039474	0.001507	1.08699	0.891228	0.896042	0.956037	0.991652	0.982086	0.631742	0.692704	0.76828	26.8567	0.515725	0	0	0	0.653533	0	0	0	6.46966	0	0.540815	0.285493	0.653533	0.313974	0	0	0.653533	1.88011	9.68905	0.76101	0.48371	-0.03949	0
d1014	0	0	-0.131509	-0.124998	-0.224774	0.800528	0.106741	-0.156661	0.494447	-0.040966	-0.041126	0.142684	0.153645	0.160428	0.075941	-0.002422	0.683633	0.887039	0.873187	0.882877	0.96985	1.02672	0.530444	0.547318	0.504794	33.1274	0.22118	0	0	0	0	0	0	0	5.73155	0	0.461118	0.282873	0	0	0	0	0	1.99485	10.0735	0.74211	0.4697	-0.0263	0
d1015	0	0	-0.153393	0.087915	-0.069463	1.05317	0.003217	0.004383	0.74434	-0.072651	-0.028755	0.117294	0.110837	0.112418	0.002063	0.005786	0.761008	0.885885	0.996926	0.915485	1.00731	1.00154	0.50592	0.561728	0.527779	20.4115	0.018344	0	0	0	0.985312	0	0	0	6.93551	0	0.603978	0.25778	0.491578	0	0	0	0.493734	1.80723	9.30416	0.75801	0.49063	-0.04603	0
d1016	0	0	-0.256686	-0.190052	-0.065989	0.902232	0.055684	0.007564	1.19956	-0.084659	-0.017674	0.074707	0.074678	0.103132	0.038308	-0.038896	0.887474	0.899438	0.906868	0.930984	0.961542	1.04694	0.575383	0.788413	0.702296	17.4856	0.119934	0	0	0	0	0	0	0	7.11973	0	0.617158	0.285235	0	0	0	0	0	1.69309	9.32565	0.77653	0.49557	-0.05141	0
d1017	0	0	-0.176867	-0.004039	-0.06937	0.813738	-0.16184	-0.09954	1.2042	-0.097526	-0.042832	0.120651	0.142048	0.122822	-0.100174	0.061166	0.694952	0.878552	0.813747	0.857326	1.0693	1.02347	0.483836	0.496646	0.582866	8.96565	0.11599	0	0	0	0.56191	0	0	0	7.15983	0	0.632069	0.340785	0.56191	0.509446	0	0	0.56191	1.80488	9.18001	0.78527	0.51965	-0.07264	0
d1018	0	0	0.118255	-0.095655	-0.301516	-0.090201	-0.208922	-0.128839	1.79199	0.074126	-0.226385	-0.242733	-0.235849	-0.163035	-0.136159	-0.031468	0.865003	1.25024	1.35529	1.2007	1.07172	0.852872	0.773267	0.615622	0.838263	2.51786	0.239912	1	0	0	0.844066	0	0	0	0	0.864373	0.397527	0.366196	0.844066	0	0	0	0.844066	0	0	0.82469	0.51795	-0.07769	0
d1019	0	0	0.03389	0.046276	-0.106348	0.653971	-0.199776	0.113325	1.32761	0.013507	-0.041687	0.13165	0.133078	0.191946	-0.129268	0.020568	0.729829	0.862808	0.910842	0.837556	1.10102	1.12093	0.51487	0.499648	0.587198	7.90516	0.371991	0	0	0	0	0	0	0	7.15665	0	0.630897	0.339719	0	0.583483	0	0	0	1.81342	9.19383	0.80732	0.53371	-0.08325	0
d1020	0	0	0.032148	0.067731	0.239042	0.665651	-0.158699	0.223735	1.28573	0.012537	0.093223	0.132366	0.129661	0.193295	-0.101112	0.04632	0.805655	0.856457	0.845435	0.819783	1.05826	1.08034	0.517209	0.505195	0.599915	9.11986	0.326799	0	0	0	0	0	0	0	7.1236	0	0.628208	0.338532	0	0.599361	0	0	0	1.83951	9.19515	0.80606	0.53688	-0.08516	0
d1021	0	0	-0.154076	-0.102355	0.042023	-0.115287	0.106434	0.183497	0.821397	-0.05851	0.014411	0.076563	0.096575	0.081303	0.069971	0.008852	0.827413	0.91387	0.940653	0.93282	0.922248	0.986469	0.561928	0.662437	0.581361	18.217	0.508125	0	0	0	0	0	0	0	7.18363	0	0.634006	0.262743	0	0.577735	0	0	0	1.76133	9.17657	0.777	0.49805	-0.05534	0
d1022	0	0	-0.227896	-0.010066	0.089949	0.663142	0.00287	-0.280157	1.1149	-0.159664	0.055494	0.036642	0.048731	0.085448	0.001937	-0.125637	0.858388	0.958334	0.983135	0.930385	0.989007	0.97711	0.529387	0.522895	0.566197	9.61149	0.057852	0	0	0	1.36077	0	0	0	6.94264	0	0.609168	0.270643	0.437552	0	0	0	0.48567	1.83342	9.2385	0.76341	0.48447	-0.0443	0
d1023	0	0	0.104476	-0.395865	0.183398	0.974736	-0.12823	-0.033698	1.90366	0.026087	0.042366	0.138247	0.082995	0.122179	-0.079044	-0.000506	1.10137	0.86876	0.979565	0.910608	1.11098	1.04103	0.825478	0.854933	0.825195	11.952	0	0	0	0	1.86877	0	0	0	6.00619	0	0.497494	0.265661	0.934383	0	0	0	0.934383	0	0	0.83709	0.55088	-0.10958	0
d1024	0	0	-0.179459	0.095472	-0.059494	0.410332	-0.072443	-0.161328	1.40343	-0.104982	-0.031595	0.045016	0.066581	0.066217	-0.042148	0.105369	0.671346	0.88187	0.891458	0.963312	1.01277	1.00943	0.563389	0.619088	0.673892	7.74515	0.075312	0	0	0	0	0	0	0	7.3313	0	0.651457	0	0	0	0	0	0	1.77091	9.11607	0.80167	0.53608	-0.09062	0
d1025	0	0	-0.108749	0.026992	0.1126	0.705066	0.006591	0.000891	?	-0.112559	0.068654	0.143958	0.085789	0.125374	0.013962	0	0.70933	0.59774	0.822079	0.609681	0.68895	0.786151	0	0	0	16.3986	0.383535	0	0	0	0	0	0	0	0	0	0	0	0	0	0	0	0	0	0	0.73245	0.60734	-0.16475	0
d1026	0	0	-0.031845	-0.116146	0.037368	0.406855	0.071827	-0.02809	0.7368	-0.010377	0.010006	0.129581	0.154341	0.139486	0.048821	-0.020973	1.12845	0.858781	0.857683	0.899348	0.988652	1.02176	0.587056	0.650686	0.657245	20.7553	0.076804	0	0	0	0	0	0	0	6.34273	0	0.527345	0.284088	0	0	0	0	0	1.92778	9.74718	0.77749	0.4925	-0.04924	0
d1027	0	0	-0.172425	0.046744	-0.101031	0.735419	-0.077208	-0.189872	1.03182	-0.09177	-0.050847	0.099277	0.121125	0.106869	-0.048144	-0.045825	0.773301	0.888337	0.897964	0.901453	1.05111	1.0005	0.469258	0.529882	0.581826	11.4928	0.449283	0	0	0	1.46728	0	0	0	6.83627	0	0.593008	0.276268	0.430266	0.536487	0	0	0.540868	1.86872	9.34765	0.77712	0.51159	-0.06483	0
d1028	0	0	-0.17308	-0.035381	0.072541	0.54698	-0.096485	0.045851	0.717525	-0.077221	0.025877	0.075179	0.106454	0.12144	-0.06467	-0.004817	0.825648	0.922739	0.889286	0.903839	1.06936	1.0498	0.464246	0.498829	0.544548	17.6883	0.481507	0	0	0	0.571207	0	0	0	6.26532	0	0.522296	0.264344	0.571207	0.48835	0	0	0.571207	1.95507	9.72747	0.75392	0.48373	-0.03749	0
d1029	0	0	0.01495	-0.009569	-0.072332	0.688078	0.167367	0.004129	0.437947	0.005518	-0.019191	0.16718	0.164026	0.124854	0.119242	0.034739	0.989636	0.840674	0.829874	0.901389	0.915654	0.954856	0.525656	0.724899	0.654307	28.2933	0.389566	0	0	0	0.981367	0	0	0	6.30107	0	0.528498	0.25232	0.490683	0.468756	0	0	0.490683	3.94075	0	0.73587	0.46703	-0.0227	0
d1030	0	0	-0.115787	0.087475	-0.031926	-0.031811	-0.195019	-0.114028	1.37551	-0.100949	-0.032947	-0.235658	-0.181692	-0.078639	-0.12765	-0.138722	0.745476	1.23697	1.29104	1.12593	1.07745	0.924735	0.76168	0.734982	0.467356	3.20236	0.173367	1	0	0	0.702812	0	0	0	0	0	0	0.34394	0.702812	0	0	0	0.702812	0	0	0.7963	0.5	-0.05974	0
d1031	0	0	0.263802	-0.358289	-0.192369	-0.654322	-0.263062	0.020212	1.42212	0.115994	-0.071572	0.030665	0.024692	0.078907	-0.163632	-0.003569	0.705718	0.920642	1.02811	0.929634	1.10387	1.04561	0.96434	0.819061	0.711308	8.56917	0.068348	0	0	0	0.84466	0	0	0	6.9689	0	0.618019	0.73708	0.84466	0	0	0	0.84466	0	0	0.82667	0.54433	-0.09799	0
d1032	0	0	-0.246227	-0.028821	0.037222	1.25788	0.022844	-0.058178	0.986231	-0.083313	0.009898	0.114711	0.11278	0.08468	0.014756	0.007418	0.953708	0.858882	0.917184	0.948108	1.00645	1.04537	0.598261	0.678137	0.714689	15.0572	0.028308	0	0	0	0	0	0	0	6.71233	0	0.570674	0.308078	0	0	0	0	0	1.8564	9.52773	0.81111	0.52207	-0.0797	0
d1033	0	0	-0.310248	-0.210173	-0.324725	0.873328	0.001575	0.004105	1.11828	-0.092642	-0.085302	0.097323	0.101511	0.118358	0.001111	-0.028952	1.1157	0.892286	0.896315	0.92949	1.03841	1.04616	0.627713	0.85854	0.827637	16.1803	0.161937	0	0	0	0	0	0	0	7.06438	0	0.618198	0.281979	0	0	0	0	0	1.72984	9.24602	0.78378	0.49457	-0.05361	0
d1034	0	0	-0.147508	0.003609	0.182359	1.17265	0.067665	-0.139616	0.452208	-0.052496	0.038282	0.113925	0.126249	0.129288	0.047618	-0.031413	0.725707	0.910037	0.891895	0.907704	0.987775	1.0293	0.471161	0.511648	0.542142	34.5175	0.275068	0	0	0	0	0	0	0	6.02721	0	0.496941	0.279059	0	0	0	0	0	1.97711	9.83595	0.73081	0.46484	-0.02016	0
d1035	0	0	-0.404528	0.403593	0.086584	2.94575	0.106545	-0.033143	0.715735	-0.119081	0.022071	0.170907	0.197766	0.18256	0.070687	-0.067001	1.26231	0.817797	0.832049	0.842057	0.949992	0.983792	0.66913	0.637517	0.721673	23.8717	0.123368	0	0	0	0	0	0	0	6.01755	0	0.490253	0.291974	0	0	0	0	0	1.97692	9.94848	0.78258	0.49844	-0.05418	0
d1036	0	0	-0.748267	0.575937	-0.400596	5.36876	-0.085675	-0.175237	2.78943	-0.200021	-0.097818	0.035722	0.086444	0.088975	-0.055283	0.107029	0.671424	0.945989	0.893125	0.910926	1.04947	1.04293	0.585951	0.580076	0.775378	8.18791	0	0	0	0	0	0	0	0	7.16343	5.82957	0.629939	0.300822	0	0	0	0	0	2.28002	10.1158	0.84843	0.55952	-0.11913	0
d1037	0	0	-0.23468	-0.144333	-0.297813	0.574002	0.053278	0.011126	1.20006	-0.086372	-0.090461	0.066066	0.054147	0.048882	0.03666	-0.048182	1.00819	0.916338	0.933689	0.976185	0.97845	1.04565	0.585356	0.800418	0.96819	15.9139	0.019861	0	0	0	0	0	0	0	7.00564	0	0.610464	0.281494	0	0	0	0	0	1.7387	9.28538	0.76863	0.48968	-0.04652	0
d1038	0	0	0.287853	-0.501126	-0.027513	-1.30502	-0.143853	0.030934	0.906293	0.090402	-0.008403	0.033343	0.038938	0.067567	-0.094435	-0.039556	0.794966	0.961394	1.04873	0.95735	1.08212	0.998569	0.912819	0.826469	0.708465	17.4114	0.238877	0	0	0	0.873349	0	0	0	6.66206	0	0.574825	0.269618	0.873349	0	0	0	0.873349	0	0	0.79868	0.51292	-0.06816	0
d1039	0	0	0.167723	-0.455355	-0.124376	-0.607315	-0.293409	-0.045062	1.33849	0.083095	-0.057195	0.015127	0.041662	0.084391	-0.181295	-0.002459	0.687594	0.96152	0.968778	0.919641	1.16406	1.01424	0.745431	0.696764	0.724764	8.46057	0.436748	0	0	0	1.45329	0	0	0	6.61099	0	0.566992	0.375865	0.548223	0.535623	0	0	0.905071	0	0	0.81783	0.53688	-0.08987	0
d1040	0	0	-0.091408	0.109425	-0.029373	1.42755	0.102392	0.106462	0.744253	-0.040855	-0.011628	0.138416	0.111974	0.081391	0.066473	0.040601	0.897965	0.847042	0.92929	0.965088	0.964663	0.947827	0.506801	0.584986	0.633102	18.8383	0.094713	0	0	0	0.891634	0	0	0	6.44772	0	0.541644	0.241833	0.445586	0	0	0	0.446048	1.90699	9.64818	0.75676	0.48778	-0.04409	0
d1041	0	0	0.11079	-0.219032	-0.105854	0.579997	0.106403	0.349653	2.0218	0.045432	-0.037574	0.06376	0.016275	-0.014485	0.068403	0.022879	0.741915	0.948298	0.906033	0.962631	0.91572	1.18881	0.709314	0.624728	0.637392	3.66644	0.260666	0	0	0	0.858154	0	0	0	7.05592	0	0.631647	0.395007	0.858154	0	0	0	0.858154	0	0	0.85196	0.56432	-0.11964	0
d1042	0	0	-0.236744	-0.058267	0.203617	0.668744	0.050561	-0.196068	0.827035	-0.093497	0.069606	0.124071	0.17447	0.118333	0.03406	-0.014228	0.885858	0.88901	0.880051	0.916453	1.02623	1.04437	0.531855	0.590187	0.574992	16.0476	0.125422	0	0	0	0	0	0	0	6.17986	0	0.517192	0.270931	0	0	0	0	0	1.96971	9.69266	0.78172	0.49779	-0.05688	0
d1043	0	0	-0.255853	-0.379691	0.053511	0.243923	0.04807	0.005628	1.19222	-0.071775	0.012257	0.032413	0.042362	0.074584	0.033319	-0.043955	0.819303	0.950049	0.950211	0.968332	0.971597	1.05005	0.598756	0.803384	0.674636	18.0775	0.228096	0	0	0	0	0	0	0	7.10657	0	0.614936	0.289015	0	0	0	0	0	1.69264	9.34134	0.79289	0.50424	-0.0607	0
d1044	0	0	-0.310248	-0.210173	-0.324725	0.873328	0.001575	0.004105	1.11828	-0.092642	-0.085302	0.097323	0.101511	0.118358	0.001111	-0.028952	1.1157	0.892286	0.896315	0.92949	1.03841	1.04616	0.627713	0.85854	0.827637	16.1803	0.161937	0	0	0	0	0	0	0	7.06438	0	0.618198	0.281979	0	0	0	0	0	1.72984	9.24602	0.78378	0.49457	-0.05361	0
d1045	0	0	0.120141	-0.416145	-0.071875	-0.317698	-0.523276	0.10796	1.98808	0.073634	-0.070483	0.010714	-0.001673	0.070238	-0.3189	-0.016941	0.644109	0.990517	0.957771	0.899216	1.2503	0.797404	0.775378	0.688489	0.604475	3.01558	0.400218	0	0	0	1.74121	0	0	0	7.16237	0	0.650862	0.397178	0.461466	0	0	0	0.818279	0	0	0.84533	0.56732	-0.12239	0
d1046	0	0	-0.174844	-0.036252	-0.061553	0.566952	0.011059	0.010292	0.868135	-0.066658	-0.021816	0.103591	0.100418	0.078993	0.007269	0.005991	0.819592	0.894055	0.963062	0.957082	1.01239	1.01218	0.569877	0.633576	0.564422	16.4912	0.15036	0	0	0	0	0	0	0	7.04301	0	0.615514	0.277358	0	0	0	0	0	1.77849	9.26671	0.78485	0.49632	-0.05438	0
d1047	0	0	-0.27555	-0.190826	-0.122561	0.973411	0.067229	-0.048427	1.1719	-0.090368	-0.032552	0.073916	0.072495	0.099354	0.046324	-0.012742	0.919808	0.901268	0.908648	0.932737	0.953551	1.03184	0.583894	0.796336	0.704131	17.6974	0.091119	0	0	0	0	0	0	0	7.11852	0	0.617063	0.284727	0	0	0	0	0	1.6926	9.32542	0.77443	0.49348	-0.04964	0
d1048	0	0	?	?	?	-0.791782	-0.029174	-0.04932	1.6581	0	0	-0.190339	-0.197007	-0.229927	-0.01241	0.00493	0	1.16028	1.29987	1.42647	1.25095	1.08966	0.751879	1.01414	1.31687	17.8887	0	0	0	0	6.92563	0	0	0	6.6206	0	0.567965	0.434347	0.551173	0	17.1047	0	0.603517	0	0	0.79257	0.50713	-0.0607	0
d1049	0	0	-0.145023	-0.107057	0.021726	0.198158	0.001841	0.113446	0.88068	-0.055012	0.007941	0.099013	0.113597	0.096089	0.001219	0.046403	0.771372	0.895908	0.940106	0.932083	1.00642	1.01361	0.576957	0.633849	0.629486	16.6841	0.452297	0	0	0	0	0	0	0	7.06038	0	0.616222	0.254142	0	0	0	0	0	1.80779	9.28193	0.78125	0.49494	-0.05271	0
d1050	0	0	-0.1431	0.201253	-0.268072	-0.119458	-0.303211	-0.097538	1.99099	-0.054051	-0.094363	0.015073	0.081491	0.138654	-0.187006	0.123605	0.691076	0.96715	0.944584	0.885905	1.20053	0.9712	0.707569	0.852548	0.900452	5.97397	0.370994	0	0	0	1.99726	0	0	0	6.59506	0.970295	0.513963	0.391932	0.570545	0.415398	0	0	0.750928	0	0	0.84228	0.55853	-0.11339	0
d1051	0	0	0.034727	-0.168594	0.207423	0.280461	-0.22801	-0.161592	1.43435	0.015	0.076593	0.018453	0.005582	0.063977	-0.144901	0.024212	0.94901	0.957627	1.01446	0.941774	1.11878	1.04848	0.823146	0.856491	0.820402	9.09246	0.080512	0	0	0	1.49279	0	0	0	6.25268	0	0.525654	0.398874	0.572669	0.393385	0	0	0.920121	0	0	0.79744	0.52108	-0.0746	0
d1052	0	0	-0.410209	0.308242	0.232187	3.02391	-0.047561	-0.046614	0.602156	-0.115939	0.051692	0.083978	0.089946	0.069264	-0.033776	-0.044428	1.51528	0.932763	0.931549	0.96906	1.07963	0.989846	0.628579	0.605189	0.672344	27.3172	0.025504	0	0	0	0	0	0	0	5.86955	0	0.48058	0.279779	0	0.390515	0	0	0	1.99334	9.90412	0.76597	0.48259	-0.04036	0
d1053	0	0	-0.205872	0.07815	-0.058976	0.182085	-0.142338	-0.16686	1.44055	-0.135882	-0.036814	0.07087	0.119076	0.11853	-0.083271	0.077293	0.714087	0.856821	0.922307	0.902308	1.09038	1.02491	0.563	0.632989	0.662855	7.86924	0.049472	0	0	0	0	0	0	0	7.26047	0	0.644021	0	0	0	0	0	0	1.79354	9.13573	0.80086	0.53534	-0.08955	0
d1054	0	0	-0.211251	0.405953	0.194289	2.70364	0.056772	0.042767	0.645489	-0.053175	0.042252	0.114303	0.106748	0.066842	0.039511	0.026066	1.12895	0.871108	0.890912	0.97445	1.00151	0.990831	0.617943	0.669212	0.76407	27.1624	0.22137	0	0	0	0	0	0	0	6.51721	0	0.544575	0.265679	0	0	0	0	0	1.86198	9.68944	0.76799	0.48609	-0.04433	0
d1055	0	0	0.066753	-0.200184	0.070002	-0.831252	0.12448	0.044864	0.568742	0.028361	0.023922	0.113604	0.137267	0.134541	0.088752	0.059998	0.857754	0.870512	0.833844	0.876112	0.911604	0.99134	0.584042	0.852115	0.719927	22.5507	0.737293	0	0	0	0	0	0	0	6.73635	0	0.582518	0.257701	0	0.578001	0	0	0	3.64907	0	0.74726	0.47152	-0.02723	0
d1056	0	0	0.044107	-0.212329	0.052204	0.211469	-0.273659	-0.084749	1.43435	0.019057	0.019133	0.024581	0.013245	0.08522	-0.173911	0.030686	0.941376	0.951569	1.00688	0.920775	1.13836	1.03445	0.822444	0.858163	0.817796	9.09246	0.081263	0	0	0	1.50717	0	0	0	6.28085	0	0.529434	0.408731	0.591382	0.393385	0	0	0.915789	0	0	0.79744	0.52108	-0.0746	0
d1057	0	0	0.084473	-0.247019	0.166903	-0.40349	-0.360209	-0.13074	2.0623	0.031902	0.059511	0.034686	0.066659	0.110588	-0.220337	-0.014513	0.812801	0.953276	0.960289	0.90705	1.21924	0.955386	0.701269	0.765029	0.867765	5.58387	0.341295	0	0	0	2.15946	0	0	0	6.46694	0	0.517222	0.394023	0.573949	0.40572	0	0	0.908771	0	0	0.84583	0.56305	-0.1176	0
d1058	0	0	-0.087255	-0.02636	0.166283	-0.937704	-0.239366	-0.14849	1.92438	-0.032699	0.058264	0.032385	0.086144	0.124798	-0.148793	-0.050326	0.83965	0.953014	0.939789	0.903652	1.17093	0.962997	0.698842	0.858717	0.986577	6.36407	0.395922	0	0	0	1.92004	0	0	0	6.68861	0	0.511047	0.390248	0.567904	0.423006	0	0	0.677152	0	0	0.83889	0.55431	-0.10948	0
d1059	0	0	0.140245	-0.453079	-0.199804	-0.040171	-0.071691	-0.089795	1.12329	0.073091	-0.098181	0.148777	0.129729	0.16508	-0.045524	-0.022345	0.562516	0.849691	0.895878	0.851549	1.03153	1.02654	0.732645	0.683407	0.611045	10.9725	0.375158	0	0	0	0.825826	0	0	0	6.72966	0	0.591886	0.263556	0.825826	0.619455	0	0	0.825826	0	0	0.78681	0.51636	-0.06867	0
d1060	0	0	0.14025	-0.453035	-0.203064	0.246836	-0.010374	-0.006439	0.957582	0.069179	-0.095472	0.151441	0.140118	0.156727	-0.006752	-0.008339	0.573645	0.850592	0.883106	0.857598	1.00688	1.00465	0.708897	0.6649	0.592605	13.3131	0.419195	0	0	0	0.825826	0	0	0	6.62173	0	0.578655	0.22787	0.825826	0.617395	0	0	0.825826	0	0	0.77716	0.5045	-0.05855	0
d1061	0	0	-0.147912	-0.144548	-0.02732	-0.236377	0.109815	0.104226	0.905763	-0.059626	-0.00974	0.091314	0.121461	0.096232	0.071241	0.065069	0.72368	0.892977	0.894035	0.915112	0.92185	1.03111	0.559453	0.666408	0.640004	16.4575	0.504617	0	0	0	0	0	0	0	7.0571	0	0.61688	0.273962	0	0.575468	0	0	0	1.81759	9.27008	0.78677	0.50044	-0.05806	0
d1062	0	0	-0.102427	-0.314438	-0.205118	-0.785475	0.074422	0.16424	0.669611	-0.026763	-0.048101	0.11174	0.129488	0.128088	0.049428	0.075808	0.798284	0.866221	0.895344	0.918468	0.960188	1.00497	0.673472	0.759876	0.697702	29.1184	0.08161	0	0	0	0	0	0	0	6.32875	0	0.523595	0.281234	0	0	0	0	0	1.90894	9.79128	0.77443	0.49089	-0.04733	0
d1063	0	0	-0.310912	0.272636	0.017301	2.33522	0.009832	-0.081867	0.641085	-0.093541	0.004384	0.093059	0.124347	0.113903	0.007007	-0.037688	1.03679	0.922895	0.922268	0.923525	1.0353	1.04848	0.603648	0.625038	0.67719	25.4289	0.23471	0	0	0	0	0	0	0	5.91325	0	0.487016	0.279658	0	0	0	0	0	1.99143	9.84733	0.76667	0.48137	-0.04066	0
d1064	0	0	-0.173893	0.103158	0.223233	1.12035	0.005495	0.198545	1.26102	-0.103257	0.167224	0.133205	0.136317	0.092955	0.003683	-0.17751	0.652253	0.876032	0.822255	0.858056	0.981971	0.825231	0.602604	0.518619	0.649759	6.95223	0.049434	0	0	0	0	0	0	0	7.28823	0	0.648596	0.359128	0	0	0	0	0	1.7517	9.10023	0.78633	0.50394	-0.0634	0
d1065	0	0	-0.21344	-0.14654	0.361013	0.776431	0.087956	-0.125902	0.45881	-0.061062	0.062284	0.131223	0.147336	0.149162	0.062555	-0.026952	0.775419	0.90012	0.882386	0.898144	0.989565	1.04752	0.5414	0.566518	0.559363	37.173	0.634468	0	0	0	0	0	0	0	5.78327	0	0.470553	0.284455	0	0	0	0	0	2.00138	9.96659	0.74095	0.46817	-0.02507	0
d1066	0	0	-0.161507	0.055882	-0.029529	1.38244	0.023463	-0.022019	0.622861	-0.070904	-0.011962	0.115421	0.118413	0.104896	0.015462	-0.021952	0.855945	0.897037	0.973619	0.923745	1.00378	0.984067	0.49897	0.569953	0.539721	24.6571	0.147458	0	0	0	1.87071	0	0	0	6.86104	0	0.594912	0.25778	0.4427	0	0	0	0.493734	1.81678	9.34492	0.75019	0.4813	-0.03833	0
d1067	0	0	-0.354515	0.395963	0.059577	2.29236	-0.015524	0.012363	0.679974	-0.097273	0.014661	0.091339	0.107795	0.085578	-0.010614	-0.032022	1.12068	0.905363	0.908924	0.943372	1.04168	1.0313	0.623372	0.650837	0.677649	25.1579	0.55611	0	0	0	0	0	0	0	6.95117	0	0.600993	0.284257	0	0	0	0	0	1.78501	9.36478	0.7767	0.49275	-0.05023	0
d1068	0	0	-0.221849	0.301537	0.057029	1.45625	-0.048388	-0.061332	?	-0.141295	0.029127	0.219432	0.168032	0.219617	-0.092428	0	0.785983	0.922793	1.1523	0.81532	0.841212	0.933669	0	0	0	13.8185	0.219706	0	0	0	0	0	0	0	0	0	0	0	0	0	0	0	0	0	0	0.75875	0.62861	-0.18881	0
d1069	0	0	-0.207783	-0.193459	0.2763	-0.242093	-0.084793	0.102411	0.695067	-0.071527	0.078184	0.078864	0.118014	0.136365	-0.05735	-0.002897	0.838516	0.910071	0.878552	0.886787	1.05586	1.07605	0.560046	0.587868	0.59442	21.6101	0.692065	0	0	0	0.590012	0	0	0	6.12824	0	0.503479	0.280974	0.590012	0.455284	0	0	0.590012	1.96214	9.8659	0.76341	0.48812	-0.04169	0
d1070	0	0	-0.1312	0.208658	-0.181418	0.15284	-0.174727	-0.075498	1.70912	-0.081552	-0.125533	-0.248013	-0.18696	-0.086301	-0.115002	-0.119255	0.820261	1.2471	1.297	1.13915	1.07291	0.935718	0.782784	0.794279	0.587025	2.90796	0.215233	1	0	0	0.715158	0	0	0	0	0.844859	0.386073	0.364349	0.715158	0	0	0	0.715158	0	0	0.82024	0.51422	-0.07422	0
d1071	0	0	-0.257188	-0.085376	0.065788	0.106445	0.045999	0.038613	0.979637	-0.10571	0.024845	0.142957	0.181572	0.126354	0.029904	0.03289	0.852773	0.830906	0.797635	0.887005	0.993437	1.06945	0.576656	0.615419	0.628031	14.4648	0.397502	0	0	0	0	0	0	0	6.95207	0	0.601065	0.277578	0	0	0	0	0	1.83033	9.37034	0.78966	0.50882	-0.06561	0
d1072	0	0	-0.174374	0.012445	-0.003052	0.391308	-0.16293	-0.116227	1.32368	-0.099912	-0.001771	0.05893	0.103619	0.10511	-0.098808	0.064644	0.736433	0.914299	0.847394	0.886622	1.0649	1.02093	0.477996	0.533438	0.588023	7.69617	0.235529	0	0	0	0.98792	0	0	0	7.20918	0	0.638267	0.383024	0.426011	0.52539	0	0	0.56191	1.79961	9.15352	0.79167	0.52868	-0.08053	0
d1073	0	0	-0.185228	-0.111932	0.034099	0.46812	0.034442	0.013718	0.754672	-0.069594	0.01143	0.133615	0.14571	0.130753	0.022655	-0.053118	0.816876	0.876681	0.954047	0.909072	1.01307	1.04333	0.564735	0.632216	0.630435	20.4717	0.231765	0	0	0	1.02055	0	0	0	6.6137	0	0.565168	0.274119	0.503405	0	0	0	0.517144	1.89584	9.48856	0.77544	0.49638	-0.05432	0
d1074	0	0	-0.131664	0.364938	0.199812	2.248	0.152187	0.006799	0.52512	-0.031224	0.033682	0.078838	0.095236	0.064488	0.107574	0.002143	1.03052	0.921048	0.933693	0.971441	0.926759	1.01941	0.595041	0.703432	0.692356	36.0719	0.388191	0	0	0	0	0	0	0	6.3148	0	0.524607	0.285992	0	0.46955	0	0	0	1.85756	9.7455	0.7522	0.47518	-0.03303	0
d1075	0	0	-0.192411	-0.137155	-0.024753	0.368526	0.032532	-0.130968	0.790253	-0.079918	-0.008701	0.09784	0.147502	0.138559	0.022654	-0.022038	0.749818	0.917096	0.903039	0.896369	1.01885	1.05618	0.535045	0.576939	0.545759	17.676	0.140162	0	0	0	0	0	0	0	6.19444	0	0.519283	0.270312	0	0	0	0	0	1.96243	9.67576	0.76984	0.48616	-0.04538	0
d1076	0	0	-0.127191	-0.137078	0.003877	0.19142	0.115734	0.037919	0.74159	-0.050221	0.001214	0.133456	0.152889	0.157723	0.081436	0.076278	0.890245	0.852717	0.807516	0.849446	0.919253	1.00709	0.521089	0.599813	0.583667	19.5152	0.735613	0	0	0	0	0	0	0	7.0175	0	0.611863	0.257358	0	0.573307	0	0	0	3.50155	9.29101	0.75662	0.47825	-0.03581	0
d1077	0	0	-0.18534	0.038854	-0.030268	0.4603	-0.145172	-0.23984	1.32368	-0.106144	-0.01801	0.050542	0.092892	0.078277	-0.088038	0.056549	0.745359	0.922556	0.857954	0.913035	1.06603	0.968587	0.479029	0.532005	0.589439	7.69617	0.218113	0	0	0	0.972927	0	0	0	7.20556	0	0.637551	0.373088	0.430656	0.52539	0	0	0.542271	1.79985	9.15902	0.79167	0.52868	-0.08053	0
d1078	0	0	-0.174374	0.012445	-0.003052	0.391308	-0.16293	-0.116227	1.32368	-0.099912	-0.001771	0.05893	0.103619	0.10511	-0.098808	0.064644	0.736433	0.914299	0.847394	0.886622	1.0649	1.02093	0.477996	0.533438	0.588023	7.69617	0.235529	0	0	0	0.98792	0	0	0	7.20918	0	0.638267	0.383024	0.426011	0.52539	0	0	0.56191	1.79961	9.15352	0.79167	0.52868	-0.08053	0
d1079	0	0	0.166126	-0.551644	-0.131622	-0.95638	-0.267014	-0.06591	1.32405	0.07318	-0.053922	-0.024927	0.020712	0.060702	-0.1664	-0.017978	0.665391	1.00305	0.990474	0.949288	1.15468	1.01492	0.76412	0.713521	0.69613	8.46917	0.368112	0	0	0	1.47169	0	0	0	6.59769	0	0.564926	0.38821	0.563848	0.490248	0	0	0.907841	0	0	0.82963	0.5432	-0.09686	0
d1080	0	0	-0.23702	0.14294	-0.035032	1.29465	0.078316	-0.004667	0.871694	-0.093814	-0.011742	0.189962	0.179696	0.096682	0.049685	0.023701	1.00089	0.767505	0.785596	0.965289	1.03794	1.06504	0.501775	0.565818	0.662852	14.6446	0.606275	0	0	0	0.557143	0	0	0	6.52826	0	0.546264	0.281809	0.557143	0.486624	0	0	0.557143	1.87916	9.67891	0.77077	0.50676	-0.05819	0
d1081	0	0	-0.174345	-0.016254	-0.012187	0.316439	-0.069426	-0.02429	1.21282	-0.11803	-0.007478	0.01495	0.048131	0.06423	-0.042429	0.083656	0.61214	0.930517	0.942868	0.945492	1.01499	1.02106	0.56429	0.621269	0.654432	10.9959	0.112221	0	0	0	0	0	0	0	7.22248	0	0.638867	0	0	0	0	0	0	1.79733	9.16108	0.78369	0.50856	-0.06283	0
d1082	0	0	-0.165324	0.092354	-0.136796	0.434625	-0.06886	0.084759	1.40343	-0.096491	-0.073523	0.046277	0.094229	0.066049	-0.040064	0.192413	0.761185	0.878551	0.836382	0.950015	1.01567	1.03175	0.570787	0.608373	0.665308	7.74515	0.075312	0	0	0	0	0	0	0	7.34297	0	0.65263	0	0	0	0	0	0	1.76763	9.11373	0.80167	0.53608	-0.09062	0
d1083	0	0	-0.117561	0.028495	-0.110218	0.716042	-0.023299	-0.031835	?	-0.13392	-0.077616	0.150883	0.063556	0.157241	-0.065835	0	0.520946	0.620716	0.925762	0.570405	0.691123	0.704318	0	0	0	18.7349	0.347477	0	0	0	0	0	0	0	0	0	0	0	0	0	0	0	0	0	0	0.72804	0.59312	-0.14912	0
d1084	0	0	-0.167592	-0.00192	-0.032666	0.663537	-0.058037	-0.113197	1.0964	-0.090686	-0.01643	0.084973	0.106247	0.101909	-0.036602	-0.043295	0.788291	0.906061	0.910997	0.907583	1.03504	1.07978	0.458319	0.518768	0.585608	9.81897	0.436109	0	0	0	1.51107	0	0	0	6.60982	0	0.564679	0.280331	0.426011	0.521842	0	0	0.56191	1.90323	9.49045	0.77971	0.51218	-0.06615	0
d1085	0	0	-0.06012	-0.039731	-0.180869	-0.967872	-0.03862	-0.121333	2.139	-0.037628	-0.119646	-0.214154	-0.174355	-0.105565	-0.02484	-0.015234	0.879385	1.21103	1.19656	1.14447	0.980888	0.928906	0.753595	0.779547	0.714734	5.05346	0.146539	1	0	0	0	0	0	0	0	0.814613	0.373324	0.364964	0	0	0	0	0	0	0	0.84667	0.52778	-0.08824	0
d1086	0	0	-0.036583	-0.120053	-0.03903	-0.687668	0.053422	-0.131731	1.9121	-0.034157	-0.042049	-0.11574	-0.09562	-0.054402	0.035161	-0.036871	0.656863	1.1067	1.01214	1.03372	0.902134	0.930593	0.749246	0.714756	0.680207	5.04857	0.000366	1	0	0	0	0	0	0	0	0	0	0.561885	0	0	0	0	0	0	0	0.82024	0.5081	-0.0681	0
d1087	0	0	-0.036583	-0.120053	-0.03903	-0.687668	0.053422	-0.131731	1.9121	-0.034157	-0.042049	-0.11574	-0.09562	-0.054402	0.035161	-0.036871	0.656863	1.1067	1.01214	1.03372	0.902134	0.930593	0.749246	0.714756	0.680207	5.04857	0.000366	1	0	0	0	0	0	0	0	0	0	0.561885	0	0	0	0	0	0	0	0.82024	0.5081	-0.0681	0
d1088	0	0	-0.036583	-0.120053	-0.03903	-0.687668	0.053422	-0.131731	1.9121	-0.034157	-0.042049	-0.11574	-0.09562	-0.054402	0.035161	-0.036871	0.656863	1.1067	1.01214	1.03372	0.902134	0.930593	0.749246	0.714756	0.680207	5.04857	0.000366	1	0	0	0	0	0	0	0	0	0	0.561885	0	0	0	0	0	0	0	0.82024	0.5081	-0.0681	0
d1089	0	0	-0.036583	-0.120053	-0.03903	-0.687668	0.053422	-0.131731	1.9121	-0.034157	-0.042049	-0.11574	-0.09562	-0.054402	0.035161	-0.036871	0.656863	1.1067	1.01214	1.03372	0.902134	0.930593	0.749246	0.714756	0.680207	5.04857	0.000366	1	0	0	0	0	0	0	0	0	0	0.561885	0	0	0	0	0	0	0	0.82024	0.5081	-0.0681	0
d1090	0	0	-0.036583	-0.120053	-0.03903	-0.687668	0.053422	-0.131731	1.9121	-0.034157	-0.042049	-0.11574	-0.09562	-0.054402	0.035161	-0.036871	0.656863	1.1067	1.01214	1.03372	0.902134	0.930593	0.749246	0.714756	0.680207	5.04857	0.000366	1	0	0	0	0	0	0	0	0	0	0.561885	0	0	0	0	0	0	0	0.82024	0.5081	-0.0681	0
d1091	0	0	-0.036583	-0.120053	-0.03903	-0.687668	0.053422	-0.131731	1.9121	-0.034157	-0.042049	-0.11574	-0.09562	-0.054402	0.035161	-0.036871	0.656863	1.1067	1.01214	1.03372	0.902134	0.930593	0.749246	0.714756	0.680207	5.04857	0.000366	1	0	0	0	0	0	0	0	0	0	0.561885	0	0	0	0	0	0	0	0.82024	0.5081	-0.0681	0
d1092	0	0	-0.036583	-0.120053	-0.03903	-0.687668	0.053422	-0.131731	1.9121	-0.034157	-0.042049	-0.11574	-0.09562	-0.054402	0.035161	-0.036871	0.656863	1.1067	1.01214	1.03372	0.902134	0.930593	0.749246	0.714756	0.680207	5.04857	0.000366	1	0	0	0	0	0	0	0	0	0	0.561885	0	0	0	0	0	0	0	0.82024	0.5081	-0.0681	0
d1093	0	0	-0.036583	-0.120053	-0.03903	-0.687668	0.053422	-0.131731	1.9121	-0.034157	-0.042049	-0.11574	-0.09562	-0.054402	0.035161	-0.036871	0.656863	1.1067	1.01214	1.03372	0.902134	0.930593	0.749246	0.714756	0.680207	5.04857	0.000366	1	0	0	0	0	0	0	0	0	0	0.561885	0	0	0	0	0	0	0	0.82024	0.5081	-0.0681	0
d1094	0	0	-0.036583	-0.120053	-0.03903	-0.687668	0.053422	-0.131731	1.9121	-0.034157	-0.042049	-0.11574	-0.09562	-0.054402	0.035161	-0.036871	0.656863	1.1067	1.01214	1.03372	0.902134	0.930593	0.749246	0.714756	0.680207	5.04857	0.000366	1	0	0	0	0	0	0	0	0	0	0.561885	0	0	0	0	0	0	0	0.82024	0.5081	-0.0681	0
d1095	0	0	-0.036583	-0.120053	-0.03903	-0.687668	0.053422	-0.131731	1.9121	-0.034157	-0.042049	-0.11574	-0.09562	-0.054402	0.035161	-0.036871	0.656863	1.1067	1.01214	1.03372	0.902134	0.930593	0.749246	0.714756	0.680207	5.04857	0.000366	1	0	0	0	0	0	0	0	0	0	0.561885	0	0	0	0	0	0	0	0.82024	0.5081	-0.0681	0
d1096	0	0	-0.036583	-0.120053	-0.03903	-0.687668	0.053422	-0.131731	1.9121	-0.034157	-0.042049	-0.11574	-0.09562	-0.054402	0.035161	-0.036871	0.656863	1.1067	1.01214	1.03372	0.902134	0.930593	0.749246	0.714756	0.680207	5.04857	0.000366	1	0	0	0	0	0	0	0	0	0	0.561885	0	0	0	0	0	0	0	0.82024	0.5081	-0.0681	0
d1097	0	0	-0.036583	-0.120053	-0.03903	-0.687668	0.053422	-0.131731	1.9121	-0.034157	-0.042049	-0.11574	-0.09562	-0.054402	0.035161	-0.036871	0.656863	1.1067	1.01214	1.03372	0.902134	0.930593	0.749246	0.714756	0.680207	5.04857	0.000366	1	0	0	0	0	0	0	0	0	0	0.561885	0	0	0	0	0	0	0	0.82024	0.5081	-0.0681	0
d1098	0	0	-0.036583	-0.120053	-0.03903	-0.687668	0.053422	-0.131731	1.9121	-0.034157	-0.042049	-0.11574	-0.09562	-0.054402	0.035161	-0.036871	0.656863	1.1067	1.01214	1.03372	0.902134	0.930593	0.749246	0.714756	0.680207	5.04857	0.000366	1	0	0	0	0	0	0	0	0	0	0.561885	0	0	0	0	0	0	0	0.82024	0.5081	-0.0681	0
d1099	0	0	-0.107969	0.038974	-0.2027	0.552951	0.01165	-0.090114	0.921432	-0.046391	-0.076105	0.148434	0.175064	0.139283	0.007193	0.060467	0.908028	0.817159	0.809734	0.90119	1.01595	0.990967	0.502626	0.621671	0.658409	14.283	0.271461	0	0	0	2.14521	0	0	0	6.4183	0	0.53691	0.305013	0.432358	0.514332	0	0	0.573893	1.92856	9.68976	0.7776	0.5158	-0.06792	0
d1100	0	0	0.09931	-0.461896	-0.174455	-0.415004	-0.187929	-0.093638	1.17183	0.053755	-0.082984	0.025913	0.038695	0.094707	-0.122045	0.047068	0.612791	0.950718	0.936688	0.898007	1.04764	1.04323	0.808293	0.74617	0.622499	10.1304	0.080311	0	0	0	1.3932	0	0	0	6.88307	0	0.609745	0.388682	0.559912	0.494732	0	0	0.833289	0	0	0.77959	0.50796	-0.0606	0
d1101	0	0	-0.136872	0.04793	-0.259976	0.557839	0.190506	-0.366229	1.39919	-0.085342	-0.122186	0.132493	0.13519	0.140005	0.134442	-0.008164	0.822273	0.867642	0.857008	0.828468	0.836398	1.06957	0.531419	0.49666	0.47224	6.24324	0.19801	0	0	0	1.20262	0	0	0	6.74677	0	0.579782	0.362736	0.587501	0.268727	0	0	0.615123	1.82485	9.42297	0.78182	0.49875	-0.05681	0
d1102	0	0	0.313917	0.007289	0.474813	0.809671	0.034156	0.152827	0.822835	0.069882	0.078979	0.205484	0.213147	0.18475	0.022275	-0.078596	1.07398	0.782232	0.785251	0.807348	0.988708	0.998589	0.616602	0.688177	0.699157	18.2542	0.158948	0	0	0	0	0	0	0	6.2997	0	0.517653	0.299098	0	0	0	0	0	1.91694	9.85632	0.80924	0.52363	-0.07866	0
d1103	0	0	-0.151237	-0.148275	-0.08943	0.794425	0.056509	-0.07506	0.797682	-0.054521	-0.02904	0.126319	0.125703	0.099934	0.037227	-0.074117	0.875563	0.881227	0.954221	0.942861	0.995434	1.0614	0.552306	0.627027	0.642368	17.741	0.016396	0	0	0	0	0	0	0	6.20839	0	0.518467	0.276712	0	0	0	0	0	1.95916	9.7103	0.78263	0.4947	-0.0534	0
d1104	0	0	-0.251404	-0.34286	0.212387	-1.07229	-0.011858	-0.027892	1.02751	-0.095991	0.058876	-0.100026	-0.009644	0.034381	-0.00795	-0.047109	0.564894	1.03752	0.940209	0.976416	0.98096	1.0007	0.634217	0.629943	0.523842	13.3636	0.257019	0	0	0	0	0	0	0	6.89718	0	0.593107	0	0	0	0	0	0	1.8243	9.41807	0.80111	0.51026	-0.06568	0
d1105	0	0	0.137392	-0.507317	-0.07397	-0.854778	-0.204948	0.064492	1.07836	0.060489	-0.027043	0.028347	0.053996	0.112497	-0.128742	0.006558	0.699181	0.936009	0.940915	0.901945	1.0962	1.05229	0.758145	0.697908	0.709112	12.4575	0.101066	0	0	0	1.49693	0	0	0	6.47424	0	0.54948	0.405205	0.583945	0.450252	0	0	0.912985	0	0	0.79762	0.51771	-0.07034	0
d1106	0	0	-0.226936	0.133434	0.398031	1.71326	0.252645	-0.356012	1.74364	-0.082733	0.111317	0.195714	0.24866	0.196665	0.155183	0.002579	0.758963	0.802964	0.738369	0.813834	0.894509	1.10239	0.444041	0.448553	0.45969	11.6201	0	0	0	0	0	0	0	0	6.51484	0	0.554514	0.282947	0	0.604394	0	0	0	1.91284	9.52615	0.81467	0.53827	-0.09541	0
d1107	0	0	-0.10147	0.057808	-0.185709	-0.205465	-0.055207	-0.123164	1.64052	-0.068188	-0.104609	0.000178	0.045482	0.084137	-0.038535	-0.039051	0.740375	0.947114	0.923054	0.886945	0.992717	0.976842	0.532146	0.637747	0.594984	4.97104	0.234332	0	0	0	1.20262	0	0	0	7.1835	0	0.632444	0.516121	0.587501	0	0	0	0.615123	1.77128	9.19721	0.7931	0.51029	-0.06708	0
d1108	0	0	-0.192411	-0.137155	-0.024753	0.368526	0.032532	-0.130968	0.790253	-0.079918	-0.008701	0.09784	0.147502	0.138559	0.022654	-0.022038	0.749818	0.917096	0.903039	0.896369	1.01885	1.05618	0.535045	0.576939	0.545759	17.676	0.140162	0	0	0	0	0	0	0	6.19444	0	0.519283	0.270312	0	0	0	0	0	1.96243	9.67576	0.76984	0.48616	-0.04538	0
d1109	0	0	0.056195	-0.194794	-0.201673	-1.1047	-0.158752	0.066578	0.967456	0.038336	-0.117599	-0.094024	-0.053483	0.043086	-0.108723	-0.098215	0.665493	1.05204	1.0137	0.995264	1.06782	0.932922	0.59234	0.810524	0.670043	8.33927	0.150002	0	0	0	0	0	0	0	6.68348	0	0.580956	0.47608	0	0	0	0	0	0	0	0.76481	0.48388	-0.03988	0
d1110	0	0	-0.038694	-0.110506	-0.089432	-0.198114	0.119352	0.042742	0.564641	-0.013919	-0.025422	0.139679	0.149385	0.113832	0.082556	0.055697	0.825849	0.850223	0.82661	0.91442	0.944602	0.99615	0.575303	0.77611	0.659399	23.1373	0.421976	0	0	0	0	0	0	0	6.61458	0	0.564515	0.264695	0	0.514602	0	0	0	3.79884	0	0.75873	0.48176	-0.03693	0
d1111	0	0	0.044107	-0.212329	0.052204	0.211469	-0.273659	-0.084749	1.43435	0.019057	0.019133	0.024581	0.013245	0.08522	-0.173911	0.030686	0.941376	0.951569	1.00688	0.920775	1.13836	1.03445	0.822444	0.858163	0.817796	9.09246	0.081263	0	0	0	1.50717	0	0	0	6.28085	0	0.529434	0.408731	0.591382	0.393385	0	0	0.915789	0	0	0.79744	0.52108	-0.0746	0
d1112	0	0	-0.157341	0.053168	-0.024778	0.585343	-0.279746	0.110802	1.01542	-0.079492	-0.010468	0.013845	0.048673	0.047964	-0.178333	0.075208	0.645554	0.949691	0.885107	0.933964	1.14182	1.04986	0.443515	0.48763	0.539657	11.3021	0.179661	0	0	0	0.583497	0	0	0	7.05043	0	0.617088	0.31553	0.583497	0.472642	0	0	0.583497	1.82201	9.25946	0.77051	0.50734	-0.05877	0
d1113	0	0	0.044107	-0.212329	0.052204	0.211469	-0.273659	-0.084749	1.43435	0.019057	0.019133	0.024581	0.013245	0.08522	-0.173911	0.030686	0.941376	0.951569	1.00688	0.920775	1.13836	1.03445	0.822444	0.858163	0.817796	9.09246	0.081263	0	0	0	1.50717	0	0	0	6.28085	0	0.529434	0.408731	0.591382	0.393385	0	0	0.915789	0	0	0.79744	0.52108	-0.0746	0
d1114	0	0	0.065015	-0.365103	-0.104903	1.05572	-0.084702	0.195357	0.999798	0.025119	-0.030573	0.136396	0.116048	0.148652	-0.054502	0.040659	1.01195	0.868094	0.893282	0.860455	1.01596	1.14988	0.844387	0.788681	0.721608	17.7138	0.345538	0	0	0	2.22239	0	0	0	5.61618	0	0.456497	0.366855	0.563288	0.504559	0	0	0.924184	0	0	0.77333	0.5025	-0.05571	0
d1115	0	0	-0.174374	0.012445	-0.003052	0.391308	-0.16293	-0.116227	1.32368	-0.099912	-0.001771	0.05893	0.103619	0.10511	-0.098808	0.064644	0.736433	0.914299	0.847394	0.886622	1.0649	1.02093	0.477996	0.533438	0.588023	7.69617	0.235529	0	0	0	0.98792	0	0	0	7.20918	0	0.638267	0.383024	0.426011	0.52539	0	0	0.56191	1.79961	9.15352	0.79167	0.52868	-0.08053	0
d1116	0	0	0.085093	-0.117524	0.332912	-1.82987	-0.01414	0.154843	1.39059	0.038423	0.122439	-0.118788	-0.081032	0.007133	-0.009839	0.028902	0.384392	1.0861	1.04305	1.05199	0.998128	0.911136	0.548831	0.720215	0.60847	8.21886	0	0	0	0	0	0	0	0	6.82796	0	0.598305	0.477791	0	0	0	0	0	0	0	0.78593	0.49879	-0.05479	0
d1117	0	0	0.120301	-0.404909	-0.125571	-0.380954	-0.132229	0.024815	1.1741	0.06403	-0.051124	0.046876	0.029565	0.094514	-0.087539	0.03649	0.665504	0.918792	0.917912	0.900621	1.02422	1.04418	0.790396	0.720015	0.572408	9.55507	0.163824	0	0	0	1.45109	0	0	0	6.71414	0	0.585867	0.410007	0.599539	0.401503	0	0	0.851555	0	0	0.77569	0.50387	-0.05618	0
d1118	0	0	-0.245474	-0.124227	0.01392	0.546561	-0.057426	-0.100566	1.3801	-0.12988	0.007459	0.018249	0.007295	0.04337	-0.036871	0.028912	0.73128	0.96204	0.969857	0.958626	1.00669	1.048	0.521079	0.530138	0.449469	7.22767	0.235529	0	0	0	1.02768	0	0	0	7.60672	0	0.679649	0.402479	0.436353	0.466613	0	0	0.591331	1.65701	9.05073	0.81667	0.54031	-0.09216	0
d1119	0	0	-0.128964	-0.022454	-0.083715	1.28395	0.053994	-0.173041	0.42775	-0.046975	-0.017882	0.113089	0.129118	0.129737	0.038504	-0.033622	0.688238	0.919229	0.906278	0.914536	1.00841	1.03451	0.46259	0.515719	0.543161	36.9412	0.363706	0	0	0	0	0	0	0	5.27981	0	0.422006	0.279895	0	0	0	0	0	2.06932	10.1504	0.72613	0.46141	-0.01732	0
d1120	0	0	0.048441	-0.190563	-0.236091	-0.923251	-0.068576	-0.041674	0.829834	0.030524	-0.113293	-0.00133	0.026627	0.095874	-0.047888	-0.039413	0.755642	0.973704	0.945984	0.955545	1.04595	1.02138	0.557227	0.788388	0.643536	10.2898	0.074782	0	0	0	0	0	0	0	6.31449	0	0.537484	0.273771	0	0	0	0	0	0	0	0.75691	0.47673	-0.03412	0
d1121	0	0	?	?	?	0.333177	-0.128984	0.245243	1.89391	0	0	-0.040568	-0.075106	-0.11941	-0.058894	0.290032	0	1.02819	1.17043	1.30726	1.32014	1.11361	0.66614	0.820112	1.11386	9.79178	0.051788	0	0	0	3.26168	0	0	0	6.69778	0	0.571757	0.334117	0.626616	0	17.0653	0	0.683412	1.69884	9.46214	0.7999	0.51117	-0.0681	0
d1122	0	0	-0.129564	0.173338	-0.168473	1.28347	0.164604	0.321082	1.85839	-0.052068	-0.057145	0.0806	0.067827	0.026821	0.104333	-0.006647	0.853739	0.935556	0.900759	0.932915	0.88223	1.18968	0.496759	0.576692	0.645981	7.0494	0.386119	0	0	0	0	0	0	0	7.22955	0	0.643593	0.402217	0	0	0	0	0	2.34704	10.1462	0.81163	0.53656	-0.09202	0
d1123	0	0	-0.129564	0.173338	-0.168473	1.28347	0.164604	0.321082	1.85839	-0.052068	-0.057145	0.0806	0.067827	0.026821	0.104333	-0.006647	0.853739	0.935556	0.900759	0.932915	0.88223	1.18968	0.496759	0.576692	0.645981	7.0494	0.386119	0	0	0	0	0	0	0	7.22955	0	0.643593	0.402217	0	0	0	0	0	2.34704	10.1462	0.81163	0.53656	-0.09202	0
d1124	0	0	-0.129564	0.173338	-0.168473	1.28347	0.164604	0.321082	1.85839	-0.052068	-0.057145	0.0806	0.067827	0.026821	0.104333	-0.006647	0.853739	0.935556	0.900759	0.932915	0.88223	1.18968	0.496759	0.576692	0.645981	7.0494	0.386119	0	0	0	0	0	0	0	7.22955	0	0.643593	0.402217	0	0	0	0	0	2.34704	10.1462	0.81163	0.53656	-0.09202	0
d1125	0	0	-0.129564	0.173338	-0.168473	1.28347	0.164604	0.321082	1.85839	-0.052068	-0.057145	0.0806	0.067827	0.026821	0.104333	-0.006647	0.853739	0.935556	0.900759	0.932915	0.88223	1.18968	0.496759	0.576692	0.645981	7.0494	0.386119	0	0	0	0	0	0	0	7.22955	0	0.643593	0.402217	0	0	0	0	0	2.34704	10.1462	0.81163	0.53656	-0.09202	0
d1126	0	0	-0.129564	0.173338	-0.168473	1.28347	0.164604	0.321082	1.85839	-0.052068	-0.057145	0.0806	0.067827	0.026821	0.104333	-0.006647	0.853739	0.935556	0.900759	0.932915	0.88223	1.18968	0.496759	0.576692	0.645981	7.0494	0.386119	0	0	0	0	0	0	0	7.22955	0	0.643593	0.402217	0	0	0	0	0	2.34704	10.1462	0.81163	0.53656	-0.09202	0
d1127	0	0	-0.24231	0.152284	0.016872	1.37974	0.095417	-0.035262	0.871694	-0.095806	0.004946	0.216679	0.201961	0.110582	0.060534	-0.020672	0.983666	0.737942	0.761611	0.95317	1.03317	1.09473	0.500736	0.559339	0.649837	14.6446	0.537249	0	0	0	0.68167	0	0	0	6.43593	0	0.535696	0.282477	0.68167	0.365048	0	0	0.68167	1.89396	9.73094	0.77077	0.50676	-0.05819	0
d1128	0	0	-0.184293	0.001416	-0.029873	0.720233	-0.097746	-0.090069	1.12851	-0.106162	-0.015996	0.066809	0.062718	0.062867	-0.063272	-0.073402	0.77837	0.933561	0.99979	0.958277	1.06777	1.09108	0.454918	0.514597	0.610329	9.35047	0.436109	0	0	0	1.5528	0	0	0	6.70736	0	0.574168	0.287125	0.431869	0.486634	0	0	0.57985	1.87471	9.46688	0.79058	0.51699	-0.07096	0
d1129	0	0	-0.155461	-0.150188	-0.167675	0.722191	0.049357	-0.033355	0.647285	-0.056145	-0.053242	0.098458	0.137839	0.123169	0.035309	0.007477	0.749055	0.921744	0.908248	0.908713	1.00784	1.03925	0.515902	0.56055	0.53937	22.0194	0.067013	0	0	0	0	0	0	0	5.82079	0	0.478948	0.233601	0	0	0	0	0	2.01112	9.85987	0.75867	0.47641	-0.03688	0
d1130	0	0	-0.105457	-0.043335	0.286105	0.047619	0.012279	0.0841	1.02402	-0.037641	0.095837	0.10929	0.132883	0.148049	0.008125	-0.00967	0.942569	0.876548	0.880348	0.87283	0.992062	1.02304	0.647602	0.637063	0.64637	13.8118	0.444046	0	0	0	0	0	0	0	7.04287	0	0.615975	0.275238	0	0	0	0	0	1.84201	9.26895	0.80877	0.51805	-0.07465	0
d1131	0	0	-0.239322	0.320278	0.183817	2.24309	0.126401	0.017057	0.555144	-0.06108	0.033399	0.083143	0.10822	0.08144	0.088668	0.019255	0.984046	0.924752	0.915444	0.941573	0.933313	1.05368	0.577746	0.677149	0.653084	32.0418	0.415885	0	0	0	0	0	0	0	6.39987	0	0.539628	0.283727	0	0.477752	0	0	0	1.86918	9.60915	0.76035	0.48041	-0.03894	0
d1132	0	0	-0.200998	-0.148474	0.225626	0.077839	-0.035715	-0.133142	0.552254	-0.062057	0.040981	0.121092	0.144701	0.164458	-0.024721	0.001689	0.716089	0.882443	0.857234	0.865341	1.04029	1.07466	0.550255	0.555801	0.565059	28.8781	0.683818	0	0	0	0.612158	0	0	0	5.75288	0	0.46341	0.283614	0.612158	0.390777	0	0	0.612158	2.00371	10.0629	0.74815	0.47794	-0.031	0
d1133	0	0	-0.030987	-0.033917	-0.164943	0.269839	0.072962	0.011125	0.81781	-0.009095	-0.041498	0.164786	0.186488	0.160432	0.048563	0.073525	0.978432	0.829247	0.884883	0.911438	1.00333	1.02295	0.64753	0.692161	0.694679	19.184	0.382467	0	0	0	1.15978	0	0	0	6.28832	0	0.520925	0.279829	0.579299	0	0	0	0.58048	1.93863	9.783	0.79333	0.50904	-0.0655	0
d1134	0	0	0.055476	-0.240191	0.076075	0.621904	-0.125956	-0.0476	1.23475	0.022552	0.02758	0.094993	0.074251	0.124094	-0.081892	0.013209	1.04403	0.896821	0.94839	0.896155	1.08045	1.04196	0.777694	0.825325	0.788303	11.4331	0.166512	0	0	0	1.50717	0	0	0	5.96625	0	0.494855	0.258622	0.591382	0.391325	0	0	0.915789	0	0	0.78736	0.50938	-0.06438	0
d1135	0	0	0.055476	-0.240191	0.076075	0.621904	-0.125956	-0.0476	1.23475	0.022552	0.02758	0.094993	0.074251	0.124094	-0.081892	0.013209	1.04403	0.896821	0.94839	0.896155	1.08045	1.04196	0.777694	0.825325	0.788303	11.4331	0.166512	0	0	0	1.50717	0	0	0	5.96625	0	0.494855	0.258622	0.591382	0.391325	0	0	0.915789	0	0	0.78736	0.50938	-0.06438	0
d1136	0	0	-0.154709	-0.030598	-0.007279	0.306056	-0.117138	-0.079799	1.02145	-0.074156	-0.003226	0.058323	0.095601	0.09955	-0.072984	0.034113	0.706849	0.907282	0.851488	0.907448	1.05317	1.02927	0.44912	0.520851	0.579035	11.7615	0.227351	0	0	0	0.59131	0	0	0	7.07293	0	0.619464	0.27132	0.59131	0.467184	0	0	0.59131	1.81988	9.25322	0.77821	0.51254	-0.06396	0
d1137	0	0	-0.182092	0.110806	-0.11737	1.05556	0.25132	-0.383922	1.36229	-0.134488	-0.065341	0.110811	0.070979	0.113891	0.171209	0.002562	0.801976	0.922621	1.06627	0.887757	0.81286	1.12063	0.506674	0.409665	0.436959	6.95984	0.19801	0	0	0	1.0591	0	0	0	6.50648	0	0.55635	0.339305	0.515741	0.382801	0	0	0.543363	1.90407	9.48118	0.76667	0.4925	-0.05056	0
d1138	0	0	-0.065318	-0.032515	-0.187968	-0.862386	-0.053823	-0.084709	1.95172	-0.039773	-0.118486	-0.187298	-0.142833	-0.102097	-0.034742	-0.038308	0.94799	1.18373	1.19934	1.13769	1.01635	0.945303	0.741439	0.763524	0.698431	6.20666	0.186102	1	0	0	0	0	0	0	0	0.761598	0.348219	0.369439	0	0	0	0	0	0	0	0.82941	0.51951	-0.07785	0
d1139	0	0	0.085093	-0.117524	0.332912	-1.82987	-0.01414	0.154843	1.39059	0.038423	0.122439	-0.118788	-0.081032	0.007133	-0.009839	0.028902	0.384392	1.0861	1.04305	1.05199	0.998128	0.911136	0.548831	0.720215	0.60847	8.21886	0	0	0	0	0	0	0	0	6.82796	0	0.598305	0.477791	0	0	0	0	0	0	0	0.78593	0.49879	-0.05479	0
d1140	0	0	-0.163055	-0.131403	-0.077425	0.535781	0.016373	-0.065186	0.887919	-0.06151	-0.027088	0.128556	0.132226	0.104378	0.010544	-0.02561	0.823681	0.864184	0.911881	0.92932	1.00418	1.01575	0.564551	0.639869	0.637547	16.5527	0.170502	0	0	0	0	0	0	0	6.84652	0	0.592055	0.276712	0	0	0	0	0	1.85554	9.37336	0.79026	0.50169	-0.05961	0
d1141	0	0	?	?	?	0.504863	-0.141643	0.010106	1.82226	0	0	-0.066858	-0.105622	-0.141766	-0.067239	-0.003928	0	1.0648	1.21159	1.33512	1.32279	1.13333	0.684622	0.806345	1.07909	9.98658	0.413009	0	0	0	3.32589	0	0	0	7.19294	0	0.628175	0.33966	0.636156	0	17.4494	0	0.700536	1.65241	9.25069	0.82129	0.52646	-0.08225	0
d1142	0	0	-0.39816	0.286734	-0.260379	3.09169	-0.058348	-0.095019	0.605684	-0.117174	-0.060489	0.069498	0.083775	0.061198	-0.041713	-0.017085	1.38622	0.953191	0.95683	0.978103	1.08823	0.98886	0.616705	0.602955	0.667188	26.2968	0.040041	0	0	0	0	0	0	0	5.74018	0	0.468727	0.283152	0	0	0	0	0	2.01119	9.93253	0.76246	0.4808	-0.03847	0
d1143	0	0	0.160922	-0.528975	-0.159904	-0.541571	-0.233907	-0.081496	1.23347	0.074232	-0.070884	0.006315	0.037374	0.073347	-0.14383	-0.005111	0.688506	0.984294	0.97189	0.926129	1.12172	1.0082	0.759369	0.68907	0.707791	8.52657	0.330907	0	0	0	1.46249	0	0	0	6.56803	0	0.561726	0.382037	0.556036	0.510443	0	0	0.906456	0	0	0.81884	0.53399	-0.08796	0
d1144	0	0	-0.063797	0.07075	-0.097865	0.22689	-0.005386	-0.116345	1.19748	-0.048079	-0.071192	-0.007179	0.010316	0.066274	-0.003485	-0.00115	0.709063	1.00697	1.08812	0.979358	1.00705	1.01332	0.426284	0.841502	0.639782	4.83306	0.152185	1	0	0	0	0	0	0	0	0	0	0.263412	0	0	0	0	0	0	0	0.79247	0.50356	-0.06423	0
d1145	0	0	-0.215961	0.12207	0.431065	1.57838	0.179927	-0.205738	1.79172	-0.07954	0.115999	0.161689	0.211115	0.147707	0.112997	-0.016536	0.773539	0.840277	0.814218	0.885219	0.945477	1.10128	0.439683	0.436189	0.465187	10.9478	0	0	0	0	0	0	0	0	6.56836	0	0.560846	0.284168	0	0.562063	0	0	0	1.88903	9.49263	0.81631	0.5356	-0.09425	0
d1146	0	0	-0.012777	-0.04537	0.350386	-0.810536	-0.331945	0.458167	1.01281	-0.009103	0.265579	-0.177141	-0.1543	-0.041839	-0.231477	-0.17096	0.583442	1.17044	1.14757	1.10065	1.1932	0.821797	0.846399	0.425914	0.760308	5.98776	0.178963	0	0	0	0.720348	0	0	0	6.79304	0	0.609257	0.418748	0.720348	0	0	0	0.720348	0	0	0.77527	0.48889	-0.04636	0
d1147	0	0	-0.012777	-0.04537	0.350386	-0.810536	-0.331945	0.458167	1.01281	-0.009103	0.265579	-0.177141	-0.1543	-0.041839	-0.231477	-0.17096	0.583442	1.17044	1.14757	1.10065	1.1932	0.821797	0.846399	0.425914	0.760308	5.98776	0.178963	0	0	0	0.720348	0	0	0	6.79304	0	0.609257	0.418748	0.720348	0	0	0	0.720348	0	0	0.77527	0.48889	-0.04636	0
d1148	0	0	-0.012777	-0.04537	0.350386	-0.810536	-0.331945	0.458167	1.01281	-0.009103	0.265579	-0.177141	-0.1543	-0.041839	-0.231477	-0.17096	0.583442	1.17044	1.14757	1.10065	1.1932	0.821797	0.846399	0.425914	0.760308	5.98776	0.178963	0	0	0	0.720348	0	0	0	6.79304	0	0.609257	0.418748	0.720348	0	0	0	0.720348	0	0	0.77527	0.48889	-0.04636	0
d1149	0	0	-0.012777	-0.04537	0.350386	-0.810536	-0.331945	0.458167	1.01281	-0.009103	0.265579	-0.177141	-0.1543	-0.041839	-0.231477	-0.17096	0.583442	1.17044	1.14757	1.10065	1.1932	0.821797	0.846399	0.425914	0.760308	5.98776	0.178963	0	0	0	0.720348	0	0	0	6.79304	0	0.609257	0.418748	0.720348	0	0	0	0.720348	0	0	0.77527	0.48889	-0.04636	0
d1150	0	0	-0.012777	-0.04537	0.350386	-0.810536	-0.331945	0.458167	1.01281	-0.009103	0.265579	-0.177141	-0.1543	-0.041839	-0.231477	-0.17096	0.583442	1.17044	1.14757	1.10065	1.1932	0.821797	0.846399	0.425914	0.760308	5.98776	0.178963	0	0	0	0.720348	0	0	0	6.79304	0	0.609257	0.418748	0.720348	0	0	0	0.720348	0	0	0.77527	0.48889	-0.04636	0
d1151	0	0	-0.012777	-0.04537	0.350386	-0.810536	-0.331945	0.458167	1.01281	-0.009103	0.265579	-0.177141	-0.1543	-0.041839	-0.231477	-0.17096	0.583442	1.17044	1.14757	1.10065	1.1932	0.821797	0.846399	0.425914	0.760308	5.98776	0.178963	0	0	0	0.720348	0	0	0	6.79304	0	0.609257	0.418748	0.720348	0	0	0	0.720348	0	0	0.77527	0.48889	-0.04636	0
d1152	0	0	-0.012777	-0.04537	0.350386	-0.810536	-0.331945	0.458167	1.01281	-0.009103	0.265579	-0.177141	-0.1543	-0.041839	-0.231477	-0.17096	0.583442	1.17044	1.14757	1.10065	1.1932	0.821797	0.846399	0.425914	0.760308	5.98776	0.178963	0	0	0	0.720348	0	0	0	6.79304	0	0.609257	0.418748	0.720348	0	0	0	0.720348	0	0	0.77527	0.48889	-0.04636	0
d1153	0	0	0.026708	0.038101	-0.053809	0.746679	-0.144493	-0.073966	1.32761	0.010641	-0.019579	0.147782	0.14084	0.184038	-0.093496	-0.01311	0.735594	0.846917	0.903196	0.845346	1.07613	1.07323	0.517172	0.493174	0.59048	7.90516	0.232649	0	0	0	0	0	0	0	7.10904	0	0.624471	0.353386	0	0.559644	0	0	0	1.82221	9.22692	0.80732	0.53371	-0.08325	0
d1154	0	0	-0.151738	0.054037	-0.221281	0.264266	-0.114765	0.138724	1.70478	-0.125261	-0.151956	-0.010083	0.101845	0.127237	-0.073221	0.090694	0.669748	0.932159	0.87949	0.885474	1.05146	1.12687	0.543934	0.55332	0.597439	5.57688	0.252463	0	0	0	0.526501	0	0	0	7.31974	0	0.655209	0	0.526501	0	0	0	0.526501	1.78042	9.05337	0.79286	0.51563	-0.07204	0
d1155	0	0	-0.270527	0.124084	0.41996	2.48828	0.160342	0.007029	1.16901	-0.085968	0.106433	0.19671	0.236973	0.184211	0.107214	-0.012562	0.791218	0.812965	0.760585	0.833536	0.95469	1.1104	0.410418	0.422988	0.455871	19.2719	0	0	0	0	0	0	0	0	5.86812	0	0.483149	0.251688	0	0.440518	0	0	0	2.0003	9.85162	0.78431	0.50329	-0.06309	0
d1156	0	0	-0.063692	-0.191269	-0.314049	-1.21563	-0.101545	0.094161	2.64536	-0.032398	-0.141776	-0.034516	0.010039	0.0468	-0.067175	0.115552	0.75728	1.04249	0.977148	0.950713	1.02401	1.06586	0.608399	0.718229	0.618521	7.11965	0.160418	1	0	0	0	0	0	0	7.47677	0	0.686846	0	0	0	0	0	0	2.18566	9.80466	0.8381	0.53789	-0.09789	0
d1157	0	0	-0.161884	-0.00366	-0.018352	0.89676	-0.028833	-0.101275	0.891918	-0.082349	-0.008209	0.107025	0.105558	0.110952	-0.018487	-0.029021	0.756811	0.899694	0.983912	0.918221	1.03578	1.05664	0.468222	0.532504	0.591302	13.1279	0.399848	0	0	0	1.98014	0	0	0	6.38773	0	0.538903	0.273275	0.422289	0.55928	0	0	0.541733	1.93708	9.61206	0.76901	0.501	-0.05578	0
d1158	0	0	-0.197135	0.302242	0.198364	1.64203	-0.128653	-0.061121	0.888676	-0.082134	0.065065	0.102324	0.132382	0.129945	-0.084912	-0.033308	1.08693	0.904266	0.911368	0.900993	1.10634	1.04032	0.527133	0.725591	0.942474	18.0903	0.606958	0	0	0	0.562526	0	0	0	0	0	0	0.26784	0.562526	0.480542	0	0	0.562526	2.17107	10.1305	0.76019	0.49152	-0.04752	0
d1159	0	0	-0.061917	0.090411	-0.032767	1.08594	0.043044	-0.086743	0.712525	-0.025711	-0.010556	0.111473	0.138298	0.099456	0.028872	-0.026487	0.867646	0.874227	0.869049	0.936358	1.01457	0.984429	0.467629	0.544558	0.579395	18.7803	0.417701	0	0	0	1.03427	0	0	0	5.78144	0	0.471858	0.26547	0.4394	0.466328	0	0	0.594873	2.01529	9.93772	0.74889	0.48397	-0.03763	0
d1160	0	0	-0.190115	0.370532	0.025466	2.71353	0.046914	0.045464	0.592375	-0.044837	0.00514	0.10114	0.098272	0.074387	0.032749	0.009223	1.11122	0.886251	0.898265	0.962507	1.00169	0.987271	0.611434	0.677557	0.759212	29.7777	0.579137	0	0	0	0.667422	0	0	0	6.47287	0	0.540111	0.263351	0.667422	0.291802	0	0	0.667422	1.87396	9.70488	0.76023	0.48281	-0.03941	0
d1161	0	0	-0.149065	0.107776	-0.099881	0.550079	-0.066009	-0.133282	1.60714	-0.119171	-0.066933	-0.050796	-0.086479	0.012976	-0.04448	-0.035043	0.773053	1.05166	1.30386	0.996289	1.00883	1.09357	0.499731	0.51651	0.541635	5.68764	0.234332	0	0	0	1.0591	0	0	0	6.9528	0	0.609012	0.470196	0.515741	0	0	0	0.543363	1.8505	9.25541	0.77586	0.50294	-0.05973	0
d1162	0	0	-0.32221	0.075469	-0.184853	1.88152	0.006118	-0.113694	1.64063	-0.12234	-0.060627	0.164982	0.18958	0.181551	0.003878	0.025019	0.653558	0.843742	0.824309	0.821336	0.998413	0.980502	0.43643	0.461584	0.492999	12.8973	0.162639	0	0	0	0	0	0	0	6.77803	0	0.587753	0.248323	0	0.498206	0	0	0	1.86033	9.34898	0.80256	0.52336	-0.08282	0
d1163	0	0	0.014875	-0.24893	-0.099311	-1.08951	-0.125876	-0.152344	1.78267	0.012015	-0.074213	-0.122154	-0.086592	-0.001149	-0.084667	0.089443	0.64757	1.10631	0.991446	1.01853	1.03619	0.876407	0.725093	0.644499	0.61108	4.85657	0.037171	1	0	0	0	0	0	0	0	0	0	0.444182	0	0	0	0	0	0	0	0.81609	0.5108	-0.07104	0
d1164	0	0	0.014875	-0.24893	-0.099311	-1.08951	-0.125876	-0.152344	1.78267	0.012015	-0.074213	-0.122154	-0.086592	-0.001149	-0.084667	0.089443	0.64757	1.10631	0.991446	1.01853	1.03619	0.876407	0.725093	0.644499	0.61108	4.85657	0.037171	1	0	0	0	0	0	0	0	0	0	0.444182	0	0	0	0	0	0	0	0.81609	0.5108	-0.07104	0
d1165	0	0	0.014875	-0.24893	-0.099311	-1.08951	-0.125876	-0.152344	1.78267	0.012015	-0.074213	-0.122154	-0.086592	-0.001149	-0.084667	0.089443	0.64757	1.10631	0.991446	1.01853	1.03619	0.876407	0.725093	0.644499	0.61108	4.85657	0.037171	1	0	0	0	0	0	0	0	0	0	0.444182	0	0	0	0	0	0	0	0.81609	0.5108	-0.07104	0
d1166	0	0	0.014875	-0.24893	-0.099311	-1.08951	-0.125876	-0.152344	1.78267	0.012015	-0.074213	-0.122154	-0.086592	-0.001149	-0.084667	0.089443	0.64757	1.10631	0.991446	1.01853	1.03619	0.876407	0.725093	0.644499	0.61108	4.85657	0.037171	1	0	0	0	0	0	0	0	0	0	0.444182	0	0	0	0	0	0	0	0.81609	0.5108	-0.07104	0
d1167	0	0	0.014875	-0.24893	-0.099311	-1.08951	-0.125876	-0.152344	1.78267	0.012015	-0.074213	-0.122154	-0.086592	-0.001149	-0.084667	0.089443	0.64757	1.10631	0.991446	1.01853	1.03619	0.876407	0.725093	0.644499	0.61108	4.85657	0.037171	1	0	0	0	0	0	0	0	0	0	0.444182	0	0	0	0	0	0	0	0.81609	0.5108	-0.07104	0
d1168	0	0	0.014875	-0.24893	-0.099311	-1.08951	-0.125876	-0.152344	1.78267	0.012015	-0.074213	-0.122154	-0.086592	-0.001149	-0.084667	0.089443	0.64757	1.10631	0.991446	1.01853	1.03619	0.876407	0.725093	0.644499	0.61108	4.85657	0.037171	1	0	0	0	0	0	0	0	0	0	0.444182	0	0	0	0	0	0	0	0.81609	0.5108	-0.07104	0
d1169	0	0	0.014875	-0.24893	-0.099311	-1.08951	-0.125876	-0.152344	1.78267	0.012015	-0.074213	-0.122154	-0.086592	-0.001149	-0.084667	0.089443	0.64757	1.10631	0.991446	1.01853	1.03619	0.876407	0.725093	0.644499	0.61108	4.85657	0.037171	1	0	0	0	0	0	0	0	0	0	0.444182	0	0	0	0	0	0	0	0.81609	0.5108	-0.07104	0
d1170	0	0	0.014875	-0.24893	-0.099311	-1.08951	-0.125876	-0.152344	1.78267	0.012015	-0.074213	-0.122154	-0.086592	-0.001149	-0.084667	0.089443	0.64757	1.10631	0.991446	1.01853	1.03619	0.876407	0.725093	0.644499	0.61108	4.85657	0.037171	1	0	0	0	0	0	0	0	0	0	0.444182	0	0	0	0	0	0	0	0.81609	0.5108	-0.07104	0
d1171	0	0	0.014875	-0.24893	-0.099311	-1.08951	-0.125876	-0.152344	1.78267	0.012015	-0.074213	-0.122154	-0.086592	-0.001149	-0.084667	0.089443	0.64757	1.10631	0.991446	1.01853	1.03619	0.876407	0.725093	0.644499	0.61108	4.85657	0.037171	1	0	0	0	0	0	0	0	0	0	0.444182	0	0	0	0	0	0	0	0.81609	0.5108	-0.07104	0
d1172	0	0	-0.086663	0.039357	0.460214	1.46302	-0.193427	-0.08588	1.37549	-0.027837	0.11277	0.091465	0.119406	0.124805	-0.124966	-0.024597	0.911969	0.912938	0.924393	0.89799	1.12698	1.04266	0.59494	0.614942	0.733043	14.8144	0.505867	0	0	0	1.52795	0	0	0	5.81878	0	0.476657	0.279289	0.575485	0.438377	0	0	0.952462	2.05056	9.9669	0.78627	0.51333	-0.06865	0
d1173	0	0	-0.157315	0.068851	-0.226936	0.743888	0.050656	-0.056349	1.37254	-0.11346	-0.122976	0.12554	0.177737	0.151469	0.033322	0.061371	0.682389	0.84986	0.827406	0.869012	0.993168	1.09565	0.476113	0.50357	0.544174	7.67166	0.152206	0	0	0	0.526501	0	0	0	7.11815	0	0.628895	0.271879	0.526501	0	0	0	0.526501	1.81387	9.17396	0.77879	0.5	-0.05806	0
d1174	0	0	-0.258234	0.20724	-0.075603	1.00688	0.145162	-0.043765	0.878747	-0.110349	-0.024684	0.138761	0.122753	0.047406	0.09332	0.004639	1.09026	0.80342	0.822117	1.02212	0.998529	1.046	0.565812	0.578363	0.595706	15.0191	0.023703	0	0	0	0	0	0	0	6.84799	0	0.583154	0.287471	0	0	0	0	0	1.78619	9.50197	0.76667	0.49697	-0.05172	0
d1175	0	0	0.044394	-0.138404	-0.14257	-0.334621	0.026322	-0.035808	0.57336	0.023386	-0.051995	0.057593	0.064223	0.079442	0.019231	-0.066495	0.909574	0.953542	0.946852	0.975419	1.02779	1.04303	0.502122	0.730862	0.604688	16.5314	0.248129	0	0	0	0	0	0	0	5.01571	0	0.400736	0.239186	0	0	0	0	0	0	0	0.74094	0.4632	-0.02333	0
d1176	0	0	0.085093	-0.117524	0.332912	-1.82987	-0.01414	0.154843	1.39059	0.038423	0.122439	-0.118788	-0.081032	0.007133	-0.009839	0.028902	0.384392	1.0861	1.04305	1.05199	0.998128	0.911136	0.548831	0.720215	0.60847	8.21886	0	0	0	0	0	0	0	0	6.82796	0	0.598305	0.477791	0	0	0	0	0	0	0	0.78593	0.49879	-0.05479	0
d1177	0	0	-0.038638	-0.126325	-0.033037	-0.350147	0.053029	-0.041175	1.13081	-0.027965	-0.024887	-0.019733	-0.022038	-0.009648	0.0381	0.046644	0.722704	1.02203	0.975886	1.01363	0.9344	0.956672	0.627931	0.642919	0.605271	10.9001	0.074103	1	0	0	0	0	0	0	0	0	0	0.214004	0	0	0	0	0	0	0	0.77829	0.47884	-0.04124	0
d1178	0	0	-0.26431	0.22374	-0.420457	0.299497	-0.234168	-0.013929	1.81715	-0.125334	-0.208109	-0.180909	-0.095889	0.028052	-0.16488	0.315613	0.720527	1.18433	1.10439	1.03215	1.13654	0.833195	0.880115	0.631506	0.4143	4.92707	0.426402	0	0	0	1.39628	0	0	0	7.02876	1.15676	0.642438	0.42959	0.698141	0	0	0	0.698141	0	0	0.82473	0.51982	-0.08049	0
d1179	0	0	0.178552	-0.478375	-0.23796	-0.522158	-0.208457	0.11992	1.26105	0.09584	-0.139926	0.102921	0.08215	0.163709	-0.129143	0.00819	0.473299	0.89201	0.921888	0.852756	1.05643	1.00559	0.76269	0.728877	0.641171	10.6813	0.421173	0	0	0	0.825409	0	0	0	6.92499	0	0.616258	0.326215	0.825409	0.646635	0	0	0.825409	0	0	0.79433	0.53003	-0.07963	0
d1180	0	0	-0.17018	-0.378306	0.030975	-0.54328	0.114559	0.036335	0.735986	-0.051033	0.008608	0.161606	0.208352	0.175315	0.076887	-0.05093	0.962677	0.828495	0.815318	0.858226	0.952998	1.00995	0.649774	0.693053	0.639556	22.6856	0.303545	0	0	0	0	0	0	0	6.19986	0	0.509922	0.280747	0	0	0	0	0	1.95678	9.85425	0.78434	0.49803	-0.05431	0
d1181	0	0	-0.252137	-0.305019	-0.147516	0.95639	0.071122	0.011663	1.01989	-0.072626	-0.034847	0.099236	0.114992	0.121693	0.049664	-0.021796	1.14183	0.893101	0.907231	0.931693	0.992719	1.05325	0.622218	0.832304	0.799387	19.181	0.011705	0	0	0	0	0	0	0	6.94442	0	0.603486	0.279349	0	0.269275	0	0	0	1.748	9.31172	0.77791	0.49163	-0.05035	0
d1182	0	0	0.085093	-0.117524	0.332912	-1.82987	-0.01414	0.154843	1.39059	0.038423	0.122439	-0.118788	-0.081032	0.007133	-0.009839	0.028902	0.384392	1.0861	1.04305	1.05199	0.998128	0.911136	0.548831	0.720215	0.60847	8.21886	0	0	0	0	0	0	0	0	6.82796	0	0.598305	0.477791	0	0	0	0	0	0	0	0.78593	0.49879	-0.05479	0
d1183	0	0	-0.117772	0.051846	-0.105975	-0.142677	-0.264863	-0.065847	1.08179	-0.084638	-0.087132	-0.206305	-0.147929	-0.03401	-0.185445	-0.085449	0.680532	1.20836	1.15772	1.09044	1.13952	0.785787	0.863558	0.666492	0.479011	5.47227	0.311008	0	0	0	0.645278	0	0	0	7.05427	1.35695	0.651071	0.385641	0.645278	0	0	0	0.645278	0	0	0.78333	0.49061	-0.05061	0
d1184	0	0	?	?	?	1.80026	0.01737	0.152914	1.44396	0	0	0.082234	0.014915	-0.115269	0.007998	-0.115247	0	0.917504	1.01748	1.16981	1.13552	1.20447	0.740612	0.88366	1.16697	21.4823	0	0	0	0	0	0	0	0	6.47207	0	0.54779	0.404636	0	0	18.1755	0	0	0	0	0.77351	0.4918	-0.04524	0
d1185	0	0	-0.108306	-0.153712	0.225804	0.310014	0.040979	-0.073978	0.765393	-0.040145	0.074591	0.137127	0.182193	0.137504	0.027268	-0.026239	0.978674	0.86124	0.843459	0.89934	1.02998	1.05672	0.564855	0.607714	0.588788	19.9496	0.41423	0	0	0	0	0	0	0	6.38604	0	0.537428	0.272576	0	0	0	0	0	1.94945	9.63804	0.77923	0.49566	-0.05266	0
d1186	0	0	0.026105	-0.037172	0.166744	-0.767426	-0.041725	0.070462	1.03133	0.008185	0.04819	0.080707	0.131429	0.100462	-0.027395	0.011541	0.871751	0.904389	0.889218	0.930476	1.04793	1.01311	0.653796	0.660275	0.579659	11.2492	0.468373	0	0	0	0	0	0	0	7.03792	0	0.606422	0.278208	0	0	0	0	0	1.7863	9.39407	0.81609	0.52677	-0.08356	0
d1187	0	0	-0.160376	-0.043151	-0.07328	1.00298	0.019709	0.0653	0.75819	-0.057333	-0.023244	0.112518	0.101073	0.073876	0.013024	-0.032526	0.865853	0.898425	1.00753	0.969217	1.02161	1.04286	0.575822	0.635501	0.56786	19.4433	0.252341	0	0	0	0	0	0	0	6.89941	0	0.597868	0.275788	0	0	0	0	0	1.80234	9.34735	0.77619	0.49097	-0.04904	0
d1188	0	0	-0.223213	-0.18308	-0.214834	0.505013	0.043057	-0.004929	1.22788	-0.083369	-0.065519	0.084101	0.07625	0.068035	0.02906	-0.024234	0.981109	0.896141	0.91672	0.958578	0.986198	1.04368	0.58704	0.808592	1.02012	15.9754	0.036922	0	0	0	0	0	0	0	6.8094	0	0.587058	0.280382	0	0	0	0	0	1.80667	9.3919	0.77363	0.49468	-0.05137	0
d1189	0	0	-0.223213	-0.18308	-0.214834	0.505013	0.043057	-0.004929	1.22788	-0.083369	-0.065519	0.084101	0.07625	0.068035	0.02906	-0.024234	0.981109	0.896141	0.91672	0.958578	0.986198	1.04368	0.58704	0.808592	1.02012	15.9754	0.036922	0	0	0	0	0	0	0	6.8094	0	0.587058	0.280382	0	0	0	0	0	1.80667	9.3919	0.77363	0.49468	-0.05137	0
d1190	0	0	0.048657	-0.357451	-0.101675	1.10509	-0.080186	0.194105	1.03857	0.019049	-0.029764	0.137471	0.119179	0.146899	-0.05187	0.04199	1.01276	0.866894	0.88646	0.860065	1.01981	1.17413	0.840768	0.776773	0.716069	15.9853	0.331541	0	0	0	2.2285	0	0	0	5.63872	0	0.458849	0.366881	0.568113	0.483605	0	0	0.925096	0	0	0.77467	0.50227	-0.05593	0
d1191	0	0	-0.24231	0.152284	0.016872	1.37974	0.095417	-0.035262	0.871694	-0.095806	0.004946	0.216679	0.201961	0.110582	0.060534	-0.020672	0.983666	0.737942	0.761611	0.95317	1.03317	1.09473	0.500736	0.559339	0.649837	14.6446	0.537249	0	0	0	0.68167	0	0	0	6.43593	0	0.535696	0.282477	0.68167	0.365048	0	0	0.68167	1.89396	9.73094	0.77077	0.50676	-0.05819	0
d1192	0	0	-0.118603	-0.400005	-0.120043	1.38232	0.152028	-0.038467	1.2415	-0.03933	-0.02995	0.085517	0.069038	0.044602	0.099932	-0.045963	1.12947	0.88154	0.908289	1.00492	0.938128	1.08931	0.60168	0.818435	0.785304	13.4148	0.137009	0	0	0	0	0	0	0	6.92941	0	0.60102	0.322138	0	0.228825	0	0	0	1.78356	9.33343	0.78309	0.5045	-0.06149	0
d1193	0	0	-0.008718	-0.15912	-0.04075	-0.970833	0.011265	-0.099902	2.02834	-0.008089	-0.042878	-0.123727	-0.112674	-0.04283	0.007046	-0.003299	0.939775	1.12284	1.12896	1.04839	0.946658	0.955126	0.770288	0.732172	0.721269	4.56766	0.015541	1	0	0	0	0	0	0	0	0	0	0.555757	0	0	0	0	0	0	0	0.83457	0.52205	-0.08179	0
d1194	0	0	-0.008718	-0.15912	-0.04075	-0.970833	0.011265	-0.099902	2.02834	-0.008089	-0.042878	-0.123727	-0.112674	-0.04283	0.007046	-0.003299	0.939775	1.12284	1.12896	1.04839	0.946658	0.955126	0.770288	0.732172	0.721269	4.56766	0.015541	1	0	0	0	0	0	0	0	0	0	0.555757	0	0	0	0	0	0	0	0.83457	0.52205	-0.08179	0
[truncated: 254 more rows]
[truncated: 35 more columns]
