# Supplementary material for: Data-driven approach towards identifying dyesensitizer molecules for higher power conversion efficiency in solar cells
Source: Royal Society of Chemistry journal article supplement (doi:10.1039/d1nj05498h), 2022-01-01
Supplement: d1nj05498h2.pdf [file d1nj05498h2.pdf]

## Data-driven Approach Towards Identifying Dye-Sensitizer Molecules for Higher Power Conversion Efficiency in Solar Cells

Ganapathi Rao Kandregula<sup>1</sup>, Dhinesh Kumar Murugaiah<sup>1</sup>, N. Arul Murugan<sup>2,3\*</sup>,  
Kothandaraman Ramanujam<sup>1,4,5\*</sup>

<sup>1</sup>*Department of Chemistry, Indian Institute of Technology Madras, Chennai, India, 600 036.*

<sup>2</sup>*Department of Computer Science, School of Electrical Engineering and Computer Science 106 91, Stockholm, Sweden.*

<sup>3</sup>*Department of Computational Biology, Indraprastha Institute of Information Technology, New Delhi, India - 110020.*

<sup>4</sup>*DST-IITM Solar Energy Harnessing Centre, Indian Institute of Technology Madras, Chennai, India, 600 036.*

<sup>5</sup>*Potential Centre of Excellence: Advanced Centre for Energy Storage and Conversion, Indian Institute of Technology Madras, Chennai, India 600036.*

\*Corresponding author's e-mail: [murugan@kth.se](mailto:murugan@kth.se) & [rkraman@iitm.ac.in](mailto:rkraman@iitm.ac.in)

### Contents:

**Table S1.** The details of the descriptors selected for the machine learning algorithms

**Table S2.** Comparison of data set and type of descriptor used in the literature

**Table S3.** Absorption Maximum modified based on the structure

**Table S4.** The dependency of molar extension coefficient and oscillator strength on PCE

**BOX S1.** The QSAR model equation of the LR algorithm in ML

**Table S1.** The details of the descriptors selected for the machine learning algorithms

| Entry | Name        | Details                                                                                        |
|-------|-------------|------------------------------------------------------------------------------------------------|
| 1     | nCl         | Number of chlorine atoms                                                                       |
| 2     | ATSC3c      | Centered Broto-Moreau autocorrelation - lag 3 / weighted by charges                            |
| 3     | ATSC4c      | Centered Broto-Moreau autocorrelation - lag 4 / weighted by charges                            |
| 4     | ATSC7c      | Centered Broto-Moreau autocorrelation - lag 7 / weighted by charges                            |
| 5     | ATSC4e      | Centered Broto-Moreau autocorrelation - lag 4 / weighted by Sanderson electronegativities      |
| 6     | AATSC5i     | Average centered Broto-Moreau autocorrelation - lag 5 / weighted by first ionization potential |
| 7     | AATSC8i     | Average centered Broto-Moreau autocorrelation - lag 8 / weighted by first ionization potential |
| 8     | AATSC0s     | Average centered Broto-Moreau autocorrelation - lag 0 / weighted by I-state                    |
| 9     | MATS3c      | Moran autocorrelation - lag 3 / weighted by charges                                            |
| 10    | MATS7c      | Moran autocorrelation - lag 7 / weighted by charges                                            |
| 11    | MATS4v      | Moran autocorrelation - lag 4 / weighted by van der Waals volumes                              |
| 12    | MATS4p      | Moran autocorrelation - lag 4 / weighted by polarizabilities                                   |
| 13    | MATS5i      | Moran autocorrelation - lag 5 / weighted by first ionization potential                         |
| 14    | MATS8s      | Moran autocorrelation - lag 8 / weighted by I-state                                            |
| 15    | GATS6c      | Geary autocorrelation - lag 6 / weighted by charges                                            |
| 16    | GATS4v      | Geary autocorrelation - lag 4 / weighted by van der Waals volumes                              |
| 17    | GATS4p      | Geary autocorrelation - lag 4 / weighted by polarizabilities                                   |
| 18    | GATS5i      | Geary autocorrelation - lag 5 / weighted by first ionization potential                         |
| 19    | GATS6i      | Geary autocorrelation - lag 6 / weighted by first ionization potential                         |
| 20    | GATS3s      | Geary autocorrelation - lag 3 / weighted by I-state                                            |
| 21    | GATS4s      | Geary autocorrelation - lag 4 / weighted by I-state                                            |
| 22    | CrippenLogP | Crippen's LogP (Crippen Descriptor)                                                            |
| 23    | VE1_Dt      | Coefficient sum of the last eigenvector from detour matrix                                     |
| 24    | nsOm        | Count of atom-type E-State: -O-                                                                |
| 25    | nsCl        | Count of atom-type E-State: -Cl                                                                |
| 26    | SHCsatu     | Sum of atom-type H E-State: H on C sp <sup>3</sup> bonded to unsaturated C                     |
| 27    | SsNH2       | Sum of atom-type E-State: -NH <sub>2</sub>                                                     |
| 28    | minHBint2   | Minimum E-State descriptors of strength for potential Hydrogen Bonds of path length 2          |
| 29    | minHBint4   | Minimum E-State descriptors of strength for potential Hydrogen Bonds of path length 4          |
| 30    | minHsOH     | Minimum atom-type H E-State: -OH                                                               |

|    |                                       |                                                                                    |
|----|---------------------------------------|------------------------------------------------------------------------------------|
| 31 | minHCsatu                             | Minimum atom-type H E-State: H on C sp <sup>3</sup> bonded to unsaturated C        |
| 32 | minsssCH                              | Minimum atom-type E-State: >CH-                                                    |
| 33 | maxHCsatu                             | Maximum atom-type H E-State: H on C sp <sup>3</sup> bonded to unsaturated C        |
| 34 | maxtsC                                | Maximum atom-type E-State: #C-                                                     |
| 35 | maxtN                                 | Maximum atom-type E-State: #N                                                      |
| 36 | ETA_Epsilon_2                         | A measure of electronegative atom count                                            |
| 37 | ETA_Epsilon_4                         | A measure of electronegative atom count                                            |
| 38 | ETA_dEpsilon_C                        | A measure of contribution of electronegativity                                     |
| 39 | n4Ring                                | Number of 4-membered rings                                                         |
| 40 | nF11Ring                              | Number of 11-membered fused rings                                                  |
| 41 | nF12Ring                              | Number of 12-membered fused rings                                                  |
| 42 | nT4Ring                               | Number of 4-membered rings (includes counts from fused rings)                      |
| 43 | nT11Ring                              | Number of 11-membered rings (includes counts from fused rings)                     |
| 44 | nF11HeteroRing                        | Number of 11-membered fused rings containing heteroatoms (N, O, P, S, or halogens) |
| 45 | VE1_D                                 | Coefficient sum of the last eigenvector from topological distance matrix           |
| 46 | Active area                           | Total area covered by dye on TiO <sub>2</sub> surface                              |
| 47 | Coabsorbent (mMol)                    | Quantity of Coabsorbent used in the measurement in milli moles                     |
| 48 | Active layer(um)                      | Thickness of TiO <sub>2</sub> surface active layer                                 |
| 49 | Scattering_ layer (um)                | Thickness of TiO <sub>2</sub> surface scattering layer                             |
| 50 | Dye_Loding (nMol)                     | Quantity of dye loaded on the TiO <sub>2</sub> surface                             |
| 51 | Exposure_Time (h)                     | Time used for the dye loading on the TiO <sub>2</sub> surface                      |
| 52 | Absorption (nm)                       | Maximum peak obtained at absorption spectrum in experimental                       |
| 53 | Emission (nm)                         | Maximum peak obtained at emission spectrum in experimental                         |
| 54 | V <sub>oc</sub> (V)                   | Open circuit voltage value when the light shining on the cell                      |
| 55 | J <sub>sc</sub> (mA/cm <sup>2</sup> ) | Short circuit current value when the light shining on the cell                     |
| 56 | FF                                    | Fill factor value when the light shining on the cell                               |
| 57 | HOMO-1 (eV)                           | One state below the highest occupied molecular orbital state                       |
| 58 | HOMO (eV)                             | Highest occupied molecular orbital state                                           |
| 59 | LUMO (eV)                             | Lowest unoccupied molecular orbital state                                          |
| 60 | LUMO+1 (eV)                           | One state above the lowest unoccupied molecular orbital state                      |
| 61 | Energy gap (eV)                       | Band gap calculated (ELUMO-EHOMO)                                                  |
| 62 | Electronegativity (eV)                | Electronegativity calculated (-[EHOMO+ELUMO]/2)                                    |
| 63 | dipole                                | Dipole moment of the dye molecules                                                 |

|    |                              |                                                               |
|----|------------------------------|---------------------------------------------------------------|
| 64 | Vertical Energy (cm-1)       | Vertical Energy of the molecules in in TD-DFT calculation     |
| 65 | Computational wavelength(nm) | Maximum peak obtained at absorption spectrum in TD-DFT        |
| 66 | Oscillator Strength          | Oscillator strength of the molecules in in TD-DFT calculation |
| 67 | DRDF (eV)                    | Dye regeneration drying force of the molecules                |
| 68 | Lifetime (ns)                | Life time of the of the molecules in in TD-DFT calculation    |
| 69 | LHE (%)                      | Light Harvesting efficiency                                   |
| 70 | $\Delta G_{inject}(eV)$      | Driving force for efficient electron injection                |

**Table S2.** Comparison of data set and type of descriptor used in the literature

| Application         | Data set quantity | Descriptor quantity | R <sup>2</sup> Value (Best) | Type of Descriptors used |            |         | Reference                           |
|---------------------|-------------------|---------------------|-----------------------------|--------------------------|------------|---------|-------------------------------------|
|                     |                   |                     |                             | Experimental             | Structural | Quantum |                                     |
| DSSC                | 400               | 31                  | 0.75                        | No                       | Yes        | Yes     | 10.1002/jcc.23886                   |
| DSSC                | 600               | 6                   | 0.8                         | Some                     | 2D only    | No      | 10.1016/j.saa.2021.120387           |
| DSSC                | 223/10000         | 36                  | 0.79                        | Yes                      | Yes        | No      | 10.1002/solr.202000110              |
| DSSC                | 1200              | 14                  | 0.88                        | Some                     | 2D only    | No      | 10.1016/j.nanoen.2020.104537        |
| DSSC                | 354               | 31                  | 0.91                        | No                       | Yes        | Yes     | 10.1109/ACCESS.2018.2850048         |
| Organic Solar Cells | 566               | 13                  | 0.72                        | Yes                      | Yes        | Yes     | 10.1021/acs.chemmater.0c02325       |
| Organic Solar Cells | 54                | 970                 | 0.86                        | Yes                      | Yes        | Yes     | 10.1016/j.mtcomm.2020.101604        |
| Solar Cells         | 207               | NA                  | 0.99                        | Yes                      | No         | No      | 10.1109/ITC-Egypt52936.2021.9513898 |

|                      |         |      |      |      |     |           |                               |
|----------------------|---------|------|------|------|-----|-----------|-------------------------------|
| Solar Cell Materials | 58/1997 | 1557 | 0.87 | Some | No  | Yes       | 10.1021/acs.chemmater.9b02166 |
| Perovskite           | 333     | NA   | NA   | Yes  | No  | No        | 10.1002/aenm.201901891        |
| Perovskite           | 540     | 20+  | NA   | No   | No  | Yes       | 10.1038/s41524-019-0177-0     |
| Perovskite           | 5158    | 18   | NA   | Yes  | Yes | Simulated | 10.1016/j.nanoen.2020.105380  |
| CIGS solar cells     | 300     | 11   | 0.98 | Yes  | No  | No        | 10.1016/j.solenen.2021.09.031 |

**Table S3.** Absorption Maximum modified based on the structure

| Code of the dye | No of additional groups | Type of bond (C=C/C≡C) | Addition (nm) | Parent dye absorption maximum (nm) | New dye absorption maximum (nm) |
|-----------------|-------------------------|------------------------|---------------|------------------------------------|---------------------------------|
| d1029a          | 1                       | C=C                    | 30            | 536                                | 566                             |
| d1029b          | 2                       | C=C                    | 60            | 536                                | 596                             |
| d1029c          | 2                       | C=C                    | 60            | 536                                | 596                             |
| d1067a          | 1                       | C=C                    | 30            | 543                                | 573                             |
| d1067b          | 2                       | C≡C                    | 60            | 543                                | 603                             |
| d824a           | 1                       | C=C                    | 30            | 512                                | 542                             |
| d824b           | 2                       | C≡C                    | 60            | 512                                | 572                             |
| d1130a          | 1                       | C=C                    | 30            | 552                                | 582                             |
| d1130b          | 2                       | C≡C                    | 60            | 552                                | 612                             |
| d279a           | 0                       | NO                     | 0             | 470                                | 470                             |
| d279b           | 0                       | NO                     | 0             | 470                                | 470                             |
| d1313a          | 0                       | NO                     | 0             | 624                                | 624                             |

**Table S4.** The dependency of molar extension coefficient and oscillator strength on PCE

| Dye Name | $\epsilon$ ( $M^{-1} cm^{-1}$ ) | Oscillator strength | PCE (%) | Reference                                                                               |
|----------|---------------------------------|---------------------|---------|-----------------------------------------------------------------------------------------|
| DT1      | 63,779                          | 2.08                | 5.01    | <a href="https://doi.org/10.1016/j.dyepig.2015.10.022">10.1016/j.dyepig.2015.10.022</a> |
| DT2      | 59,430                          | 2.04                | 5.27    | <a href="https://doi.org/10.1016/j.dyepig.2015.10.022">10.1016/j.dyepig.2015.10.022</a> |
| DT3      | <b>70,802</b>                   | <b>2.17</b>         | 5.86    | <a href="https://doi.org/10.1016/j.dyepig.2015.10.022">10.1016/j.dyepig.2015.10.022</a> |

|        |                 |      |             |                                                                                         |
|--------|-----------------|------|-------------|-----------------------------------------------------------------------------------------|
| DT4    | 59,522          | 2.04 | <b>8.05</b> | <a href="https://doi.org/10.1016/j.dyepig.2015.10.022">10.1016/j.dyepig.2015.10.022</a> |
| ZL001  | <b>37,687</b>   | NA   | 12.8        | 10.1021/acsenergylett.9b00141                                                           |
| ZL003  | 29,042          | NA   | <b>13.6</b> | 10.1021/acsenergylett.9b00141                                                           |
| ND01   | <b>46,700</b>   | NA   | 7.46        | <a href="https://doi.org/10.1039/C4CC08539F">10.1039/C4CC08539F</a>                     |
| ND02   | 39,600          | NA   | <b>8.3</b>  | <a href="https://doi.org/10.1039/C4CC08539F">10.1039/C4CC08539F</a>                     |
| ND03   | 31,700          | NA   | 6.69        | <a href="https://doi.org/10.1039/C4CC08539F">10.1039/C4CC08539F</a>                     |
| ND04   | 38,200          | NA   | 7.01        | <a href="https://doi.org/10.1039/C4CC08539F">10.1039/C4CC08539F</a>                     |
| K1     | 46,300          | 0.39 | 4.25        | <a href="https://doi.org/10.1039/C5TA03807C">10.1039/C5TA03807C</a>                     |
| K2     | 57,400          | 0.47 | 4.69        | <a href="https://doi.org/10.1039/C5TA03807C">10.1039/C5TA03807C</a>                     |
| K3     | 86,100          | 0.7  | 4.78        | <a href="https://doi.org/10.1039/C5TA03807C">10.1039/C5TA03807C</a>                     |
| K4     | 75,400          | 0.6  | 4.82        | <a href="https://doi.org/10.1039/C5TA03807C">10.1039/C5TA03807C</a>                     |
| K5     | 82,100          | 0.56 | 3.95        | <a href="https://doi.org/10.1039/C5TA03807C">10.1039/C5TA03807C</a>                     |
| K6     | <b>1,38,600</b> | 0.49 | 3.82        | <a href="https://doi.org/10.1039/C5TA03807C">10.1039/C5TA03807C</a>                     |
| K7     | 1,21,100        | 0.55 | <b>5.1</b>  | <a href="https://doi.org/10.1039/C5TA03807C">10.1039/C5TA03807C</a>                     |
| K8     | 49,200          | 0.31 | 5.15        | <a href="https://doi.org/10.1039/C5TA03807C">10.1039/C5TA03807C</a>                     |
| YR6    | 2,79,000        | NA   | <b>6.5</b>  | <a href="https://doi.org/10.1021/cm5045946">10.1021/cm5045946</a>                       |
| T-PA   | <b>3,11,000</b> | NA   | 4.6         | <a href="https://doi.org/10.1021/cm5045946">10.1021/cm5045946</a>                       |
| TS3    | 1,60,000        | NA   | 5.6         | <a href="https://doi.org/10.1021/cm5045946">10.1021/cm5045946</a>                       |
| DTP-PA | 2,04,000        | NA   | 2.8         | <a href="https://doi.org/10.1021/cm5045946">10.1021/cm5045946</a>                       |
| DTT-CA | 2,31,000        | NA   | 6           | <a href="https://doi.org/10.1021/cm5045946">10.1021/cm5045946</a>                       |
| DTT-PA | <b>2,59,000</b> | NA   | 1.8         | <a href="https://doi.org/10.1021/cm5045946">10.1021/cm5045946</a>                       |
| DTS-CA | 2,57,000        | NA   | <b>8.9</b>  | <a href="https://doi.org/10.1021/cm5045946">10.1021/cm5045946</a>                       |
| DTS-PA | 2,14,000        | NA   | 5           | <a href="https://doi.org/10.1021/cm5045946">10.1021/cm5045946</a>                       |

**BOX S1.** The QSAR model equation of the LR algorithm in ML

$$\begin{aligned}
\text{PCE(\%)} = & -1.5121 * \text{ATSC3c} + 0.3734 * \text{ATSC4c} + -0.3759 * \text{ATSC7c} + -0.5806 * \text{AATSC5i} \\
& + 0.4958 * \text{AATSC8i} + 0.1775 * \text{AATSC0s} + 2.6998 * \text{MATS3c} + 1.4004 * \text{MATS7c} + 1.3417 \\
& * \text{GATS6c} + 1.9504 * \text{GATS4v} + -1.2119 * \text{GATS4p} + 0.8015 * \text{GATS6i} + -1.3404 * \text{GATS3s} \\
& + -0.6374 * \text{GATS4s} + 0.0169 * \text{CrippenLogP} + 0.2303 * \text{SHCsatu} + 0.619 * \text{SsNH2} + \\
& -0.2324 * \text{minHBint4} + 0.4864 * \text{minHsOH} + -1.0607 * \text{minHCs} + 0.2218 * \text{maxtsC} + -0.0406 \\
& * \text{maxtN} + 8.2954 * \text{ETA_Epsilon} + -29.561 * \text{ETA_Epsilo} + -15.3294 * \text{ETA_dEps} + -0.5072 * \\
& \text{n4Ring} + -0.3997 * \text{nF11Ring} + 0.1697 * \text{nF12Ring} + -0.5072 * \text{nT4Ring} + -0.3997 * \\
& \text{nT11Ring} + 0.9832 * \text{nF11HeteroRi} + -0.6378 * \text{Active Area} + 0.0156 * \text{Coabsorbent} + 0.0362 \\
& * \text{Active layer} + -0.1234 * \text{Sctering_lay} + 0.0128 * \text{Exp_Time} + 0.0026 * \text{Absorpt Max} + 0.0049 \\
& * \text{Emission Max} + -0.1897 * \text{OsciStreg} + 0.6017 * \text{LHE(\%)} + -0.0822 * \text{Ginject (eV)} + 0.0102 \\
& * \text{VOC (V)} + 0.0147 * \text{JSC (mA)} + -1.3612
\end{aligned}$$
